# Supplementary material
Source: Research Square preprint supplement (doi:10.21203/rs.3.rs-9169974/v1)
Supplement: Supplementary file 3 [file 35e1d703da8803ceded11fd4.xlsx]

## Sheet: Supplementary Table S1
Supplementary Table S1 Full dataset with prediction results from 32 in silico tools
Gene	#AlleleID	Type	Name	GeneID	GeneSymbol	HGNC_ID	ClinicalSignificance	ClinSigSimple	LastEvaluated	RS# (dbSNP)	nsv/esv (dbVar)	RCVaccession	PhenotypeIDS	PhenotypeList	Origin	OriginSimple	Assembly	ChromosomeAccession	Chromosome	Start	Stop	ReferenceAllele	AlternateAllele	Cytogenetic	ReviewStatus	NumberSubmitters	Guidelines	TestedInGTR	OtherIDs	SubmitterCategories	VariationID	PositionVCF	ReferenceAlleleVCF	AlternateAlleleVCF	SNV_Baseinfo_AAChange_refGene	SIFT_score	SIFT_pred	SIFT4G_score	SIFT4G_pred	PolyPhen2_HD_score	PolyPhen2_HD_pred	PolyPhen2_HV_score	PolyPhen2_HV_pred	MutationAssessor_score	MutationAssessor_pred	MutationTaster_score	MutationTaster_pred	FATHMM_score	FATHMM_pred
HFE	15058	single nucleotide variant	NM_000410.4(HFE):c.848A>C (p.Gln283Pro)	3077	HFE	HGNC:4886	Pathogenic/Likely pathogenic	1	Jul 03, 2023	111033563	-	RCV000000036|RCV001050090	MONDO:MONDO:0021001,MedGen:C3469186,OMIM:235200,Orphanet:139498,Orphanet:465508|MONDO:MONDO:0006507,MedGen:C0392514,OMIM:PS235200	Hemochromatosis type 1|Hereditary hemochromatosis	germline	germline	GRCh37	NC_000006.11	6	26093144	26093144	na	na	6p22.2	criteria provided, multiple submitters, no conflicts	3	ACMG2021,ACMG2022	N	ClinGen:CA280949,UniProtKB:Q30201#VAR_037304,OMIM:613609.0011	3	19	26093144	A	C	HFE:NM_139010:exon2:c.A308C:p.Q103P,HFE:NM_139003:exon3:c.A530C:p.Q177P,HFE:NM_139004:exon3:c.A572C:p.Q191P,HFE:NM_139007:exon3:c.A584C:p.Q195P,HFE:NM_139008:exon3:c.A542C:p.Q181P,HFE:NM_000410:exon4:c.A848C:p.Q283P,HFE:NM_001300749:exon4:c.A848C:p.Q283P,HFE:NM_139006:exon4:c.A806C:p.Q269P,HFE:NM_139009:exon4:c.A779C:p.Q260P	0.004	pathogenic	0.01	pathogenic	0.998	pathogenic	0.931	pathogenic	3.68	pathogenic	0.97	pathogenic	4.03	benign
SLC29A3	15602	single nucleotide variant	NM_018344.6(SLC29A3):c.1279G>A (p.Gly427Ser)	55315	SLC29A3	HGNC:23096	Pathogenic	1	Jun 12, 2022	121912583	-	RCV000000593|RCV002272004	MONDO:MONDO:0011273,MedGen:C1864445,OMIM:602782,Orphanet:168569|MedGen:CN517202	H syndrome|not provided	germline	germline	GRCh37	NC_000010.10	10	73122216	73122216	na	na	10q22.1	criteria provided, multiple submitters, no conflicts	4	-	N	ClinGen:CA114349,UniProtKB:Q9BZD2#VAR_057884,OMIM:612373.0001	3	563	73122216	G	A	SLC29A3:NM_001363518:exon6:c.G1045A:p.G349S,SLC29A3:NM_018344:exon6:c.G1279A:p.G427S	0.0	pathogenic	-	-	1.0	pathogenic	1.0	pathogenic	3.445	pathogenic	-	-	-2.3	pathogenic
SLC29A3	15604	single nucleotide variant	NM_018344.6(SLC29A3):c.1309G>A (p.Gly437Arg)	55315	SLC29A3	HGNC:23096	Pathogenic	1	Aug 23, 2022	121912584	-	RCV000000595|RCV000414664	MONDO:MONDO:0011273,MedGen:C1864445,OMIM:602782,Orphanet:168569|MedGen:CN517202	H syndrome|not provided	germline;unknown	germline	GRCh37	NC_000010.10	10	73122246	73122246	na	na	10q22.1	criteria provided, multiple submitters, no conflicts	5	-	N	ClinGen:CA114352,UniProtKB:Q9BZD2#VAR_057885,OMIM:612373.0002	3	565	73122246	G	A	SLC29A3:NM_001363518:exon6:c.G1075A:p.G359R,SLC29A3:NM_018344:exon6:c.G1309A:p.G437R	0.001	pathogenic	-	-	1.0	pathogenic	0.999	pathogenic	3.285	pathogenic	-	-	-0.14	benign
SLC29A3	15607	single nucleotide variant	NM_018344.6(SLC29A3):c.347T>G (p.Met116Arg)	55315	SLC29A3	HGNC:23096	Likely pathogenic	1	Sep 19, 2022	267607057	-	RCV000000598	MONDO:MONDO:0011273,MedGen:C1864445,OMIM:602782,Orphanet:168569	H syndrome	germline	germline	GRCh37	NC_000010.10	10	73104012	73104012	na	na	10q22.1	criteria provided, single submitter	2	-	N	ClinGen:CA114353,UniProtKB:Q9BZD2#VAR_067801,OMIM:612373.0006	3	568	73104012	T	G	SLC29A3:NM_001174098:exon3:c.T347G:p.M116R,SLC29A3:NM_001363518:exon3:c.T113G:p.M38R,SLC29A3:NM_018344:exon3:c.T347G:p.M116R	0.001	pathogenic	-	-	0.08	benign	0.02	benign	0.345	benign	-	-	0.46	benign
SLC29A3	15608	single nucleotide variant	NM_018344.6(SLC29A3):c.1346C>G (p.Thr449Arg)	55315	SLC29A3	HGNC:23096	Pathogenic	1	Aug 08, 2023	267607058	-	RCV000000599|RCV003398400	MONDO:MONDO:0011273,MedGen:C1864445,OMIM:602782,Orphanet:168569|	H syndrome|SLC29A3-related condition	germline	germline	GRCh37	NC_000010.10	10	73122283	73122283	na	na	10q22.1	criteria provided, single submitter	2	-	N	ClinGen:CA114354,UniProtKB:Q9BZD2#VAR_067809,OMIM:612373.0007	3	569	73122283	C	G	SLC29A3:NM_001363518:exon6:c.C1112G:p.T371R,SLC29A3:NM_018344:exon6:c.C1346G:p.T449R	0.003	pathogenic	-	-	0.984	pathogenic	0.928	pathogenic	2.43	pathogenic	-	-	-0.04	benign
F5	15688	single nucleotide variant	NM_000130.5(F5):c.5189A>G (p.Tyr1730Cys)	2153	F5	HGNC:3542	Pathogenic	1	Jan 11, 2019	118203907	-	RCV000000683	Human Phenotype Ontology:HP:0003225,MONDO:MONDO:0020586,MedGen:C4317320,Orphanet:326	Reduced coagulation factor V activity	germline	germline	GRCh37	NC_000001.10	1	169500043	169500043	na	na	1q24.2	criteria provided, single submitter	2	-	N	ClinGen:CA251551,UniProtKB:P12259#VAR_032700,OMIM:612309.0007	3	649	169500043	T	C	F5:NM_000130:exon15:c.A5189G:p.Y1730C	0.0	pathogenic	0.002	pathogenic	1.0	pathogenic	0.999	pathogenic	4.255	pathogenic	0.95	pathogenic	-5.45	pathogenic
F5	15693	single nucleotide variant	NM_000130.5(F5):c.6304C>T (p.Arg2102Cys)	2153	F5	HGNC:3542	Likely pathogenic	1	Feb 01, 2019	118203910	-	RCV000000688	Human Phenotype Ontology:HP:0003225,MONDO:MONDO:0020586,MedGen:C4317320,Orphanet:326	Reduced coagulation factor V activity	germline;unknown	germline	GRCh37	NC_000001.10	1	169487691	169487691	na	na	1q24.2	criteria provided, single submitter	2	-	N	ClinGen:CA251559,UniProtKB:P12259#VAR_032701,OMIM:612309.0012	3	654	169487691	G	A	F5:NM_000130:exon23:c.C6304T:p.R2102C	0.0	pathogenic	0.001	pathogenic	1.0	pathogenic	0.999	pathogenic	4.28	pathogenic	0.84	pathogenic	-4.99	pathogenic
APC	15836	single nucleotide variant	NM_000038.6(APC):c.1240C>T (p.Arg414Cys)	324	APC	HGNC:583	Benign	1	Feb 18, 2023	137854567	-	RCV000000833|RCV000034380|RCV000115067|RCV000120052|RCV000122757|RCV000315386	MONDO:MONDO:0019336,MedGen:C0017097,Orphanet:79665|MedGen:C3661900|MONDO:MONDO:0015356,MeSH:D009386,MedGen:C0027672,Orphanet:140162|MedGen:CN169374|MONDO:MONDO:0021056,MedGen:C2713442,OMIM:175100|MedGen:CN239210	Gardner syndrome|not provided|Hereditary cancer-predisposing syndrome|not specified|Familial adenomatous polyposis 1|APC-Associated Polyposis Disorders	germline;unknown	germline	GRCh37	NC_000005.9	5	112154969	112154969	na	na	5q22.2	reviewed by expert panel	26	ACMG2013,ACMG2016,ACMG2021,ACMG2022	N	ClinGen:CA004103,UniProtKB:P25054#VAR_005033,OMIM:611731.0005	3	797	112154969	C	T	APC:NM_001127511:exon8:c.C1186T:p.R396C,APC:NM_001354897:exon9:c.C1270T:p.R424C,APC:NM_001354899:exon9:c.C1156T:p.R386C,APC:NM_001354900:exon9:c.C1063T:p.R355C,APC:NM_001354901:exon9:c.C1063T:p.R355C,APC:NM_001354902:exon9:c.C967T:p.R323C,APC:NM_001354905:exon9:c.C760T:p.R254C,APC:NM_000038:exon10:c.C1240T:p.R414C,APC:NM_001354895:exon10:c.C1240T:p.R414C,APC:NM_001354896:exon10:c.C1240T:p.R414C,A…	0.0	pathogenic	0.001	pathogenic	1.0	pathogenic	0.999	pathogenic	1.965	pathogenic	0.92	pathogenic	-0.09	benign
APC	15868	single nucleotide variant	NM_000038.6(APC):c.3949G>C (p.Glu1317Gln)	324	APC	HGNC:583	Benign/Likely benign	1	Sep 01, 2023	1801166	-	RCV000000872|RCV000034389|RCV000035073|RCV000322880|RCV000579405|RCV001353725|RCV002286387	MONDO:MONDO:0021056,MedGen:C2713442,OMIM:175100|MedGen:C3661900|MedGen:CN169374|MedGen:CN239210|MONDO:MONDO:0015356,MeSH:D009386,MedGen:C0027672,Orphanet:140162|MONDO:MONDO:0002032,MedGen:C0699790|MONDO:MONDO:0021056,MedGen:C2713442,OMIM:175100	Familial adenomatous polyposis 1|not provided|not specified|APC-Associated Polyposis Disorders|Hereditary cancer-predisposing syndrome|Carcinoma of colon|Familial adenomatous polyposis 1	germline;unknown	germline	GRCh37	NC_000005.9	5	112175240	112175240	na	na	5q22.2	criteria provided, multiple submitters, no conflicts	27	ACMG2013,ACMG2016,ACMG2021,ACMG2022	N	ClinGen:CA008815,UniProtKB:P25054#VAR_009617,OMIM:611731.0036	3	829	112175240	G	C	APC:NM_001127511:exon14:c.G3895C:p.E1299Q,APC:NM_001354897:exon15:c.G3979C:p.E1327Q,APC:NM_001354899:exon15:c.G3865C:p.E1289Q,APC:NM_001354901:exon15:c.G3772C:p.E1258Q,APC:NM_001354902:exon15:c.G3676C:p.E1226Q,APC:NM_001354905:exon15:c.G3469C:p.E1157Q,APC:NM_000038:exon16:c.G3949C:p.E1317Q,APC:NM_001354895:exon16:c.G3949C:p.E1317Q,APC:NM_001354898:exon16:c.G3874C:p.E1292Q,APC:NM_001354900:exon16:…	0.154	benign	0.11	benign	0.001	benign	0.003	benign	1.24	pathogenic	0.08	benign	-2.65	pathogenic
G6PC3	16076	single nucleotide variant	NM_138387.4(G6PC3):c.758G>A (p.Arg253His)	92579	G6PC3	HGNC:24861	Pathogenic	1	Jun 01, 2023	118203968	-	RCV000001092|RCV003311633	MONDO:MONDO:0012930,MedGen:C2751630,OMIM:612541,Orphanet:331176|MedGen:C3661900	Autosomal recessive severe congenital neutropenia due to G6PC3 deficiency|not provided	germline	germline	GRCh37	NC_000017.10	17	42153128	42153128	na	na	17q21.31	criteria provided, multiple submitters, no conflicts	4	-	N	ClinGen:CA339863,UniProtKB:Q9BUM1#VAR_055157,OMIM:611045.0001	3	1037	42153128	G	A	G6PC3:NM_138387:exon6:c.G758A:p.R253H	0.002	pathogenic	0.003	pathogenic	1.0	pathogenic	0.997	pathogenic	2.165	pathogenic	0.69	pathogenic	-1.48	benign
CYP11B1	16210	single nucleotide variant	NM_000497.4(CYP11B1):c.1343G>A (p.Arg448His)	1584	CYP11B1	HGNC:2591	Pathogenic/Likely pathogenic	1	Oct 20, 2022	28934586	-	RCV000001230|RCV000791917|RCV001199200|RCV002496223	MONDO:MONDO:0008729,MedGen:C0268292,OMIM:202010,Orphanet:90795|MedGen:CN517202|MONDO:MONDO:0007080,MedGen:C3838731,OMIM:103900,Orphanet:403|MONDO:MONDO:0008729,MedGen:C0268292,OMIM:202010,Orphanet:90795;MONDO:MONDO:0007080,MedGen:C3838731,OMIM:103900,Orphanet:403	Deficiency of steroid 11-beta-monooxygenase|not provided|Glucocorticoid-remediable aldosteronism|Deficiency of steroid 11-beta-monooxygenase;Glucocorticoid-remediable aldosteronism	germline;unknown	germline	GRCh37	NC_000008.10	8	143956428	143956428	na	na	8q24.3	criteria provided, multiple submitters, no conflicts	5	-	N	ClinGen:CA339875,UniProtKB:P15538#VAR_001265,OMIM:610613.0001	3	1171	143956428	C	T	CYP11B1:NM_000497:exon8:c.G1343A:p.R448H	0.0	pathogenic	0.001	pathogenic	1.0	pathogenic	1.0	pathogenic	3.215	pathogenic	0.89	pathogenic	-1.81	pathogenic
CYP11B1	16212	single nucleotide variant	NM_000497.4(CYP11B1):c.953C>T (p.Thr318Met)	1584	CYP11B1	HGNC:2591	Pathogenic	1	May 18, 2022	104894061	-	RCV000001232|RCV001066246|RCV002504733	MONDO:MONDO:0008729,MedGen:C0268292,OMIM:202010,Orphanet:90795|MedGen:CN517202|MONDO:MONDO:0008729,MedGen:C0268292,OMIM:202010,Orphanet:90795;MONDO:MONDO:0007080,MedGen:C3838731,OMIM:103900,Orphanet:403	Deficiency of steroid 11-beta-monooxygenase|not provided|Deficiency of steroid 11-beta-monooxygenase;Glucocorticoid-remediable aldosteronism	germline;inherited;unknown	germline	GRCh37	NC_000008.10	8	143957658	143957658	na	na	8q24.3	criteria provided, multiple submitters, no conflicts	6	-	N	ClinGen:CA339876,UniProtKB:P15538#VAR_001262,OMIM:610613.0003	3	1173	143957658	G	A	CYP11B1:NM_000497:exon5:c.C953T:p.T318M,CYP11B1:NM_001026213:exon5:c.C953T:p.T318M	0.0	pathogenic	0.001	pathogenic	1.0	pathogenic	1.0	pathogenic	3.2	pathogenic	0.92	pathogenic	-2.32	pathogenic
CYP11B1	16213	single nucleotide variant	NM_000497.4(CYP11B1):c.1121G>A (p.Arg374Gln)	1584	CYP11B1	HGNC:2591	Likely pathogenic	1	Oct 08, 2022	104894062	-	RCV000001233|RCV001851528	MONDO:MONDO:0008729,MedGen:C0268292,OMIM:202010,Orphanet:90795|MedGen:CN517202	Deficiency of steroid 11-beta-monooxygenase|not provided	germline	germline	GRCh37	NC_000008.10	8	143957128	143957128	na	na	8q24.3	criteria provided, single submitter	2	-	N	ClinGen:CA339877,UniProtKB:P15538#VAR_001264,OMIM:610613.0004	3	1174	143957128	C	T	CYP11B1:NM_000497:exon6:c.G1121A:p.R374Q,CYP11B1:NM_001026213:exon6:c.G1121A:p.R374Q	0.0	pathogenic	0.0	pathogenic	1.0	pathogenic	0.996	pathogenic	3.21	pathogenic	0.82	pathogenic	-0.98	benign
CYP11B1	16217	single nucleotide variant	NM_000497.4(CYP11B1):c.956C>T (p.Thr319Met)	1584	CYP11B1	HGNC:2591	Pathogenic/Likely pathogenic	1	Feb 23, 2023	104894068	-	RCV000001237|RCV001781159|RCV002247232|RCV002496224	MONDO:MONDO:0008729,MedGen:C0268292,OMIM:202010,Orphanet:90795|MedGen:CN517202|MONDO:MONDO:0007080,MedGen:C3838731,OMIM:103900,Orphanet:403|MONDO:MONDO:0008729,MedGen:C0268292,OMIM:202010,Orphanet:90795;MONDO:MONDO:0007080,MedGen:C3838731,OMIM:103900,Orphanet:403	Deficiency of steroid 11-beta-monooxygenase|not provided|Glucocorticoid-remediable aldosteronism|Deficiency of steroid 11-beta-monooxygenase;Glucocorticoid-remediable aldosteronism	germline;unknown	germline	GRCh37	NC_000008.10	8	143957293	143957293	na	na	8q24.3	criteria provided, multiple submitters, no conflicts	5	-	N	ClinGen:CA339881,UniProtKB:P15538#VAR_001263,OMIM:610613.0008	3	1178	143957293	G	A	CYP11B1:NM_000497:exon6:c.C956T:p.T319M,CYP11B1:NM_001026213:exon6:c.C956T:p.T319M	0.0	pathogenic	0.001	pathogenic	1.0	pathogenic	0.999	pathogenic	3.165	pathogenic	0.64	pathogenic	-1.17	benign
CYP11B1	16218	single nucleotide variant	NM_000497.4(CYP11B1):c.124C>T (p.Pro42Ser)	1584	CYP11B1	HGNC:2591	Pathogenic/Likely pathogenic	1	Oct 05, 2022	104894069	-	RCV000001238|RCV000029642|RCV001851529|RCV002476907	MONDO:MONDO:0008729,MedGen:C0268292,OMIM:202010,Orphanet:90795|Human Phenotype Ontology:HP:0008258,MONDO:MONDO:0018479,MedGen:C0001627,Orphanet:418|MedGen:CN517202|MONDO:MONDO:0008729,MedGen:C0268292,OMIM:202010,Orphanet:90795;MONDO:MONDO:0007080,MedGen:C3838731,OMIM:103900,Orphanet:403	Deficiency of steroid 11-beta-monooxygenase|Congenital adrenal hyperplasia|not provided|Deficiency of steroid 11-beta-monooxygenase;Glucocorticoid-remediable aldosteronism	germline;unknown	germline	GRCh37	NC_000008.10	8	143961106	143961106	na	na	8q24.3	criteria provided, multiple submitters, no conflicts	4	-	N	ClinGen:CA213660,UniProtKB:P15538#VAR_001260,OMIM:610613.0009	3	1179	143961106	G	A	CYP11B1:NM_000497:exon1:c.C124T:p.P42S,CYP11B1:NM_001026213:exon1:c.C124T:p.P42S	0.002	pathogenic	0.012	pathogenic	1.0	pathogenic	1.0	pathogenic	2.97	pathogenic	0.93	pathogenic	-1.77	pathogenic
CYP11B1	16225	single nucleotide variant	NM_000497.4(CYP11B1):c.281C>T (p.Pro94Leu)	1584	CYP11B1	HGNC:2591	Pathogenic	1	May 25, 2022	104894070	-	RCV000001245|RCV000029646|RCV000517938|RCV002490289	MONDO:MONDO:0008729,MedGen:C0268292,OMIM:202010,Orphanet:90795|Human Phenotype Ontology:HP:0008258,MONDO:MONDO:0018479,MedGen:C0001627,Orphanet:418|MedGen:CN517202|MONDO:MONDO:0008729,MedGen:C0268292,OMIM:202010,Orphanet:90795;MONDO:MONDO:0007080,MedGen:C3838731,OMIM:103900,Orphanet:403	Deficiency of steroid 11-beta-monooxygenase|Congenital adrenal hyperplasia|not provided|Deficiency of steroid 11-beta-monooxygenase;Glucocorticoid-remediable aldosteronism	germline;unknown	germline	GRCh37	NC_000008.10	8	143960562	143960562	na	na	8q24.3	criteria provided, multiple submitters, no conflicts	6	-	N	UniProtKB:P15538#VAR_065666,OMIM:610613.0016,ClinGen:CA213667	3	1186	143960562	G	A	CYP11B1:NM_000497:exon2:c.C281T:p.P94L,CYP11B1:NM_001026213:exon2:c.C281T:p.P94L	0.0	pathogenic	0.0	pathogenic	1.0	pathogenic	1.0	pathogenic	3.18	pathogenic	0.92	pathogenic	-0.6	benign
BBS10	16370	single nucleotide variant	NM_024685.4(BBS10):c.931T>G (p.Ser311Ala)	79738	BBS10	HGNC:26291	Pathogenic	1	May 05, 2022	137852837	-	RCV000001394|RCV001093324|RCV001328242	MONDO:MONDO:0014438,MedGen:C1859568,OMIM:615987,Orphanet:110|MedGen:C3661900|MONDO:MONDO:0015229,MedGen:C0752166,OMIM:PS209900,Orphanet:110	Bardet-Biedl syndrome 10|not provided|Bardet-Biedl syndrome	germline;unknown	germline	GRCh37	NC_000012.11	12	76740834	76740834	na	na	12q21.2	criteria provided, multiple submitters, no conflicts	4	-	N	ClinGen:CA251748,UniProtKB:Q8TAM1#VAR_026399,OMIM:610148.0004	3	1331	76740834	A	C	BBS10:NM_024685:exon2:c.T931G:p.S311A	-	-	-	-	0.955	pathogenic	0.759	pathogenic	2.84	pathogenic	-	-	-1.79	pathogenic
NLRP7	16625	single nucleotide variant	NM_001127255.2(NLRP7):c.2077C>T (p.Arg693Trp)	199713	NLRP7	HGNC:22947	Pathogenic	1	Apr 28, 2017	104895506	-	RCV000001653	MONDO:MONDO:0009273,MedGen:C3463897,OMIM:231090,Orphanet:254688,Orphanet:99927	Hydatidiform mole, recurrent, 1	germline	germline	GRCh37	NC_000019.9	19	55449464	55449464	na	na	19q13.42	criteria provided, single submitter	3	-	N	ClinGen:CA115075,UniProtKB:Q8WX94#VAR_026712,OMIM:609661.0003	3	1586	55449464	G	A	NLRP7:NM_001127255:exon5:c.C2077T:p.R693W,NLRP7:NM_139176:exon5:c.C1993T:p.R665W,NLRP7:NM_206828:exon5:c.C2077T:p.R693W	0.002	pathogenic	0.001	pathogenic	1.0	pathogenic	0.971	pathogenic	2.525	pathogenic	0.96	pathogenic	0.57	benign
NLRP7	16627	single nucleotide variant	NM_001127255.2(NLRP7):c.2738A>G (p.Asn913Ser)	199713	NLRP7	HGNC:22947	Likely pathogenic	1	Oct 12, 2021	104895503	-	RCV000001655	MONDO:MONDO:0009273,MedGen:C3463897,OMIM:231090,Orphanet:254688,Orphanet:99927	Hydatidiform mole, recurrent, 1	germline;unknown	germline	GRCh37	NC_000019.9	19	55441939	55441939	na	na	19q13.42	criteria provided, single submitter	3	-	N	ClinGen:CA115081,UniProtKB:Q8WX94#VAR_026713,OMIM:609661.0005	3	1588	55441939	T	C	NLRP7:NM_001127255:exon9:c.A2738G:p.N913S,NLRP7:NM_139176:exon9:c.A2654G:p.N885S,NLRP7:NM_206828:exon9:c.A2738G:p.N913S	0.0	pathogenic	0.052	benign	0.997	pathogenic	0.955	pathogenic	2.47	pathogenic	1.0	pathogenic	-0.25	benign
NLRP7	16630	single nucleotide variant	NM_001127255.2(NLRP7):c.2078G>A (p.Arg693Gln)	199713	NLRP7	HGNC:22947	Pathogenic	1	Dec 27, 2019	104895502	-	RCV000001658	MONDO:MONDO:0009273,MedGen:C3463897,OMIM:231090,Orphanet:254688,Orphanet:99927	Hydatidiform mole, recurrent, 1	germline	germline	GRCh37	NC_000019.9	19	55449463	55449463	na	na	19q13.42	criteria provided, single submitter	3	-	N	ClinGen:CA115087,UniProtKB:Q8WX94#VAR_059037,OMIM:609661.0008	3	1591	55449463	C	T	NLRP7:NM_001127255:exon5:c.G2078A:p.R693Q,NLRP7:NM_139176:exon5:c.G1994A:p.R665Q,NLRP7:NM_206828:exon5:c.G2078A:p.R693Q	0.235	benign	0.13	benign	0.76	pathogenic	0.074	benign	1.975	pathogenic	1.0	pathogenic	0.66	benign
MSH2	16792	single nucleotide variant	NM_000251.3(MSH2):c.1865C>T (p.Pro622Leu)	4436	MSH2	HGNC:7325	Pathogenic	1	Sep 05, 2013	28929483	-	RCV000001823|RCV000076307|RCV000566777|RCV000630204|RCV002460877	MONDO:MONDO:0007356,MedGen:C2936783,OMIM:120435,Orphanet:144|MONDO:MONDO:0005835,MedGen:C4552100,Orphanet:144|MONDO:MONDO:0015356,MeSH:D009386,MedGen:C0027672,Orphanet:140162|MeSH:D003123,MedGen:C0009405|MedGen:C3661900	Lynch syndrome 1|Lynch syndrome|Hereditary cancer-predisposing syndrome|Hereditary nonpolyposis colorectal neoplasms|not provided	germline	germline	GRCh37	NC_000002.11	2	47702269	47702269	na	na	2p21	reviewed by expert panel	6	ACMG2013,ACMG2016,ACMG2021,ACMG2022	N	ClinGen:CA019478,UniProtKB:P43246#VAR_004482,OMIM:609309.0001	3	1753	47702269	C	T	MSH2:NM_000251:exon12:c.C1865T:p.P622L,MSH2:NM_001258281:exon13:c.C1667T:p.P556L	0.0	pathogenic	0.0	pathogenic	1.0	pathogenic	1.0	pathogenic	4.925	pathogenic	0.95	pathogenic	-4.22	pathogenic
MSH2	16795	single nucleotide variant	NM_000251.3(MSH2):c.1915C>T (p.His639Tyr)	4436	MSH2	HGNC:7325	Pathogenic	1	Sep 05, 2013	28929484	-	RCV000001826|RCV000030246|RCV000202104|RCV000491611|RCV001204094	MONDO:MONDO:0007356,MedGen:C2936783,OMIM:120435,Orphanet:144|MONDO:MONDO:0005835,MedGen:C4552100,Orphanet:144|MedGen:C3661900|MONDO:MONDO:0015356,MeSH:D009386,MedGen:C0027672,Orphanet:140162|MeSH:D003123,MedGen:C0009405	Lynch syndrome 1|Lynch syndrome|not provided|Hereditary cancer-predisposing syndrome|Hereditary nonpolyposis colorectal neoplasms	germline;unknown	germline	GRCh37	NC_000002.11	2	47702319	47702319	na	na	2p21	reviewed by expert panel	7	ACMG2013,ACMG2016,ACMG2021,ACMG2022	N	ClinGen:CA019553,UniProtKB:P43246#VAR_004483,OMIM:609309.0004	3	1756	47702319	C	T	MSH2:NM_000251:exon12:c.C1915T:p.H639Y,MSH2:NM_001258281:exon13:c.C1717T:p.H573Y	0.0	pathogenic	0.0	pathogenic	1.0	pathogenic	1.0	pathogenic	4.385	pathogenic	0.96	pathogenic	-3.07	pathogenic
MSH2	16798	single nucleotide variant	NM_000251.3(MSH2):c.1571G>C (p.Arg524Pro)	4436	MSH2	HGNC:7325	Likely pathogenic	1	Jun 21, 2019	63751207	-	RCV000001829|RCV000076197|RCV000165648|RCV000256140|RCV000531855|RCV001251063	MONDO:MONDO:0007356,MedGen:C2936783,OMIM:120435,Orphanet:144|MONDO:MONDO:0005835,MedGen:C4552100,Orphanet:144|MONDO:MONDO:0015356,MeSH:D009386,MedGen:C0027672,Orphanet:140162|MedGen:C3661900|MeSH:D003123,MedGen:C0009405|MONDO:MONDO:0018630,MedGen:C1333990,OMIM:PS120435,Orphanet:443909	Lynch syndrome 1|Lynch syndrome|Hereditary cancer-predisposing syndrome|not provided|Hereditary nonpolyposis colorectal neoplasms|Hereditary nonpolyposis colon cancer	germline	germline	GRCh37	NC_000002.11	2	47693857	47693857	na	na	2p21	reviewed by expert panel	10	ACMG2013,ACMG2016,ACMG2021,ACMG2022	N	OMIM:609309.0007,ClinGen:CA018643,UniProtKB:P43246#VAR_004479	3	1759	47693857	G	C	MSH2:NM_000251:exon10:c.G1571C:p.R524P,MSH2:NM_001258281:exon11:c.G1373C:p.R458P	0.0	pathogenic	0.002	pathogenic	1.0	pathogenic	0.999	pathogenic	3.295	pathogenic	1.0	pathogenic	-2.69	pathogenic
MSH2	16801	single nucleotide variant	NM_000251.3(MSH2):c.965G>A (p.Gly322Asp)	4436	MSH2	HGNC:7325	Benign	0	Sep 05, 2013	4987188	-	RCV000001832|RCV000030257|RCV000034561|RCV000121567|RCV000144615|RCV000157760|RCV001083998|RCV001262750|RCV001353916	|MONDO:MONDO:0005835,MedGen:C4552100,Orphanet:144|MedGen:C3661900|MedGen:CN169374|MONDO:MONDO:0007356,MedGen:C2936783,OMIM:120435,Orphanet:144|MONDO:MONDO:0015356,MeSH:D009386,MedGen:C0027672,Orphanet:140162|MeSH:D003123,MedGen:C0009405|Human Phenotype Ontology:HP:0003002,MONDO:MONDO:0004989,MedGen:C0678222|MONDO:MONDO:0002032,MedGen:C0699790	MSH2 POLYMORPHISM|Lynch syndrome|not provided|not specified|Lynch syndrome 1|Hereditary cancer-predisposing syndrome|Hereditary nonpolyposis colorectal neoplasms|Breast carcinoma|Carcinoma of colon	germline;unknown	germline	GRCh37	NC_000002.11	2	47643457	47643457	na	na	2p21	reviewed by expert panel	30	ACMG2013,ACMG2016,ACMG2021,ACMG2022	N	ClinGen:CA022645,UniProtKB:P43246#VAR_004477,OMIM:609309.0010	3	1762	47643457	G	A	MSH2:NM_000251:exon6:c.G965A:p.G322D,MSH2:NM_001258281:exon7:c.G767A:p.G256D	0.107	benign	0.218	benign	0.714	pathogenic	0.34	benign	2.2	pathogenic	0.16	benign	-2.65	pathogenic
MSH2	16803	single nucleotide variant	NM_000251.3(MSH2):c.1906G>C (p.Ala636Pro)	4436	MSH2	HGNC:7325	Pathogenic	1	Sep 05, 2013	63750875	-	RCV000030245|RCV000130428|RCV000202220|RCV000376757|RCV000524366|RCV000763493|RCV001353396	MONDO:MONDO:0005835,MedGen:C4552100,Orphanet:144|MONDO:MONDO:0015356,MeSH:D009386,MedGen:C0027672,Orphanet:140162|MedGen:C3661900|MONDO:MONDO:0007356,MedGen:C2936783,OMIM:120435,Orphanet:144|MeSH:D003123,MedGen:C0009405|MONDO:MONDO:0008018,MedGen:C1321489,OMIM:158320,Orphanet:587;MONDO:MONDO:0010159,MedGen:C5399763,OMIM:276300,Orphanet:252202;MONDO:MONDO:0007356,MedGen:C2936783,OMIM:120435,Orphan…	Lynch syndrome|Hereditary cancer-predisposing syndrome|not provided|Lynch syndrome 1|Hereditary nonpolyposis colorectal neoplasms|Muir-Torré syndrome;Turcot syndrome;Lynch syndrome 1|Carcinoma of colon	germline;unknown	germline	GRCh37	NC_000002.11	2	47702310	47702310	na	na	2p21	reviewed by expert panel	18	ACMG2013,ACMG2016,ACMG2021,ACMG2022	N	OMIM:609309.0012,ClinGen:CA019533,UniProtKB:P43246#VAR_012944	3	1764	47702310	G	C	MSH2:NM_000251:exon12:c.G1906C:p.A636P,MSH2:NM_001258281:exon13:c.G1708C:p.A570P	0.056	benign	0.149	benign	0.845	pathogenic	0.566	pathogenic	2.62	pathogenic	0.96	pathogenic	-2.0	pathogenic
CYP17A1	16819	single nucleotide variant	NM_000102.4(CYP17A1):c.316T>C (p.Ser106Pro)	1586	CYP17A1	HGNC:2593	Pathogenic	1	Aug 12, 2019	104894135	-	RCV000001852|RCV000288112|RCV000763211	MONDO:MONDO:0800379,MedGen:CN042980|MedGen:CN517202|MONDO:MONDO:0008730,MedGen:C0268285,OMIM:202110,Orphanet:90793	17-alpha-hydroxylase/17,20-lyase deficiency, combined complete|not provided|Deficiency of steroid 17-alpha-monooxygenase	germline;unknown	germline	GRCh37	NC_000010.10	10	104595131	104595131	na	na	10q24.32	criteria provided, multiple submitters, no conflicts	4	-	N	ClinGen:CA115179,UniProtKB:P05093#VAR_001272,OMIM:609300.0004	3	1780	104595131	A	G	CYP17A1:NM_000102:exon2:c.T316C:p.S106P	0.003	pathogenic	0.005	pathogenic	1.0	pathogenic	0.995	pathogenic	3.36	pathogenic	0.45	benign	-1.24	benign
CYP17A1	16824	single nucleotide variant	NM_000102.4(CYP17A1):c.286C>T (p.Arg96Trp)	1586	CYP17A1	HGNC:2593	Pathogenic	1	Mar 24, 2023	104894138	-	RCV000001858|RCV000255053|RCV000501502|RCV003114170	MONDO:MONDO:0800379,MedGen:CN042980|MedGen:C3661900|MONDO:MONDO:0008730,MedGen:C0268285,OMIM:202110,Orphanet:90793|Human Phenotype Ontology:HP:0008258,MONDO:MONDO:0018479,MedGen:C0001627,Orphanet:418	17-alpha-hydroxylase/17,20-lyase deficiency, combined complete|not provided|Deficiency of steroid 17-alpha-monooxygenase|Congenital adrenal hyperplasia	germline;unknown	germline	GRCh37	NC_000010.10	10	104596833	104596833	na	na	10q24.32	criteria provided, multiple submitters, no conflicts	7	-	N	OMIM:609300.0009,ClinGen:CA115183,UniProtKB:P05093#VAR_022746	3	1785	104596833	G	A	CYP17A1:NM_000102:exon1:c.C286T:p.R96W	0.0	pathogenic	0.0	pathogenic	1.0	pathogenic	1.0	pathogenic	4.28	pathogenic	0.75	pathogenic	-1.7	pathogenic
CYP17A1	16826	single nucleotide variant	NM_000102.4(CYP17A1):c.1040G>A (p.Arg347His)	1586	CYP17A1	HGNC:2593	Pathogenic	1	Nov 17, 2021	61754278	-	RCV000001860|RCV000185577|RCV001387555	MONDO:MONDO:0800378,MedGen:C3277849|MONDO:MONDO:0008730,MedGen:C0268285,OMIM:202110,Orphanet:90793|MedGen:CN517202	17,20-lyase deficiency, isolated|Deficiency of steroid 17-alpha-monooxygenase|not provided	germline;unknown	germline	GRCh37	NC_000010.10	10	104592367	104592367	na	na	10q24.32	criteria provided, multiple submitters, no conflicts	6	-	N	ClinGen:CA115184,UniProtKB:P05093#VAR_001275,OMIM:609300.0012	3	1787	104592367	C	T	CYP17A1:NM_000102:exon6:c.G1040A:p.R347H	0.001	pathogenic	0.015	pathogenic	1.0	pathogenic	0.989	pathogenic	4.14	pathogenic	0.89	pathogenic	-0.46	benign
CYP17A1	16827	single nucleotide variant	NM_000102.4(CYP17A1):c.1073G>A (p.Arg358Gln)	1586	CYP17A1	HGNC:2593	Pathogenic/Likely pathogenic	1	Aug 20, 2022	104894139	-	RCV000001861|RCV001804710|RCV001851566	MONDO:MONDO:0800378,MedGen:C3277849|Human Phenotype Ontology:HP:0008258,MONDO:MONDO:0018479,MedGen:C0001627,Orphanet:418|MedGen:CN517202	17,20-lyase deficiency, isolated|Congenital adrenal hyperplasia|not provided	germline	germline	GRCh37	NC_000010.10	10	104592334	104592334	na	na	10q24.32	criteria provided, multiple submitters, no conflicts	3	-	N	ClinGen:CA115185,UniProtKB:P05093#VAR_001276,OMIM:609300.0013	3	1788	104592334	C	T	CYP17A1:NM_000102:exon6:c.G1073A:p.R358Q	0.019	pathogenic	0.094	benign	1.0	pathogenic	0.986	pathogenic	2.075	pathogenic	0.81	pathogenic	-0.34	benign
CYP17A1	16833	single nucleotide variant	NM_000102.4(CYP17A1):c.1039C>T (p.Arg347Cys)	1586	CYP17A1	HGNC:2593	Pathogenic/Likely pathogenic	1	Dec 15, 2021	104894149	-	RCV000001867|RCV001804711|RCV002221463	MONDO:MONDO:0800380,MedGen:C4017190|Human Phenotype Ontology:HP:0008258,MONDO:MONDO:0018479,MedGen:C0001627,Orphanet:418|MONDO:MONDO:0008730,MedGen:C0268285,OMIM:202110,Orphanet:90793	17-alpha-hydroxylase/17,20-lyase deficiency, combined partial|Congenital adrenal hyperplasia|Deficiency of steroid 17-alpha-monooxygenase	germline;unknown	germline	GRCh37	NC_000010.10	10	104592368	104592368	na	na	10q24.32	criteria provided, multiple submitters, no conflicts	3	-	N	UniProtKB:P05093#VAR_022752,OMIM:609300.0021,ClinGen:CA115191	3	1794	104592368	G	A	CYP17A1:NM_000102:exon6:c.C1039T:p.R347C	0.0	pathogenic	0.005	pathogenic	1.0	pathogenic	0.996	pathogenic	3.795	pathogenic	0.97	pathogenic	-0.47	benign
CYP17A1	16835	single nucleotide variant	NM_000102.4(CYP17A1):c.1084C>T (p.Arg362Cys)	1586	CYP17A1	HGNC:2593	Pathogenic	1	Apr 25, 2023	104894142	-	RCV000001869|RCV000810182|RCV001831505|RCV003114171|RCV003415624	MONDO:MONDO:0800379,MedGen:CN042980|MedGen:C3661900|MONDO:MONDO:0008730,MedGen:C0268285,OMIM:202110,Orphanet:90793|Human Phenotype Ontology:HP:0008258,MONDO:MONDO:0018479,MedGen:C0001627,Orphanet:418|	17-alpha-hydroxylase/17,20-lyase deficiency, combined complete|not provided|Deficiency of steroid 17-alpha-monooxygenase|Congenital adrenal hyperplasia|CYP17A1-related condition	germline	germline	GRCh37	NC_000010.10	10	104592323	104592323	na	na	10q24.32	criteria provided, multiple submitters, no conflicts	5	-	N	OMIM:609300.0023,ClinGen:CA115192,UniProtKB:P05093#VAR_022753	3	1796	104592323	G	A	CYP17A1:NM_000102:exon6:c.C1084T:p.R362C	0.0	pathogenic	0.044	pathogenic	1.0	pathogenic	1.0	pathogenic	4.38	pathogenic	0.92	pathogenic	-4.41	pathogenic
CYP17A1	16836	single nucleotide variant	NM_000102.4(CYP17A1):c.1216T>C (p.Trp406Arg)	1586	CYP17A1	HGNC:2593	Pathogenic	1	Jul 13, 2022	104894143	-	RCV000001870|RCV001851567	MONDO:MONDO:0800379,MedGen:CN042980|MedGen:CN517202	17-alpha-hydroxylase/17,20-lyase deficiency, combined complete|not provided	germline	germline	GRCh37	NC_000010.10	10	104591292	104591292	na	na	10q24.32	criteria provided, single submitter	2	-	N	ClinGen:CA115193,UniProtKB:P05093#VAR_022754,OMIM:609300.0024	3	1797	104591292	A	G	CYP17A1:NM_000102:exon7:c.T1216C:p.W406R	0.0	pathogenic	0.011	pathogenic	1.0	pathogenic	1.0	pathogenic	4.355	pathogenic	0.96	pathogenic	-0.87	benign
CYP17A1	16838	single nucleotide variant	NM_000102.4(CYP17A1):c.1283C>T (p.Pro428Leu)	1586	CYP17A1	HGNC:2593	Pathogenic	1	Sep 23, 2022	104894145	-	RCV000001872|RCV001220851|RCV001831506	MONDO:MONDO:0800379,MedGen:CN042980|MedGen:CN517202|MONDO:MONDO:0008730,MedGen:C0268285,OMIM:202110,Orphanet:90793	17-alpha-hydroxylase/17,20-lyase deficiency, combined complete|not provided|Deficiency of steroid 17-alpha-monooxygenase	germline	germline	GRCh37	NC_000010.10	10	104590703	104590703	na	na	10q24.32	criteria provided, single submitter	3	-	N	ClinGen:CA115195,UniProtKB:P05093#VAR_022756,OMIM:609300.0026	3	1799	104590703	G	A	CYP17A1:NM_000102:exon8:c.C1283T:p.P428L	0.003	pathogenic	0.004	pathogenic	1.0	pathogenic	0.997	pathogenic	1.97	pathogenic	0.9	pathogenic	-0.34	benign
CYP17A1	16841	single nucleotide variant	NM_000102.4(CYP17A1):c.287G>A (p.Arg96Gln)	1586	CYP17A1	HGNC:2593	Pathogenic	1	Oct 08, 2022	104894153	-	RCV000001875|RCV001067683|RCV002298430	MONDO:MONDO:0800379,MedGen:CN042980|MedGen:CN517202|Human Phenotype Ontology:HP:0008258,MONDO:MONDO:0018479,MedGen:C0001627,Orphanet:418	17-alpha-hydroxylase/17,20-lyase deficiency, combined complete|not provided|Congenital adrenal hyperplasia	germline	germline	GRCh37	NC_000010.10	10	104596832	104596832	na	na	10q24.32	criteria provided, multiple submitters, no conflicts	3	-	N	OMIM:609300.0029,ClinGen:CA115200,UniProtKB:P05093#VAR_073043	3	1802	104596832	C	T	CYP17A1:NM_000102:exon1:c.G287A:p.R96Q	0.0	pathogenic	0.0	pathogenic	1.0	pathogenic	1.0	pathogenic	4.28	pathogenic	0.94	pathogenic	-1.67	pathogenic
CYP17A1	16842	single nucleotide variant	NM_000102.4(CYP17A1):c.374G>A (p.Arg125Gln)	1586	CYP17A1	HGNC:2593	Pathogenic	1	Sep 24, 2022	104894154	-	RCV000001876|RCV001376810|RCV001826403	MONDO:MONDO:0800379,MedGen:CN042980|MedGen:CN517202|MONDO:MONDO:0008730,MedGen:C0268285,OMIM:202110,Orphanet:90793	17-alpha-hydroxylase/17,20-lyase deficiency, combined complete|not provided|Deficiency of steroid 17-alpha-monooxygenase	germline	germline	GRCh37	NC_000010.10	10	104595073	104595073	na	na	10q24.32	criteria provided, single submitter	3	-	N	ClinGen:CA115201,OMIM:609300.0030	3	1803	104595073	C	T	CYP17A1:NM_000102:exon2:c.G374A:p.R125Q	0.003	pathogenic	0.0	pathogenic	1.0	pathogenic	0.997	pathogenic	3.37	pathogenic	0.71	pathogenic	-3.1	pathogenic
CYP17A1	16843	single nucleotide variant	NM_000102.4(CYP17A1):c.1247G>A (p.Arg416His)	1586	CYP17A1	HGNC:2593	Pathogenic/Likely pathogenic	1	Dec 29, 2022	104894155	-	RCV000001877|RCV000822737|RCV003225015|RCV003398415	MONDO:MONDO:0800379,MedGen:CN042980|MedGen:C3661900|MONDO:MONDO:0008730,MedGen:C0268285,OMIM:202110,Orphanet:90793|	17-alpha-hydroxylase/17,20-lyase deficiency, combined complete|not provided|Deficiency of steroid 17-alpha-monooxygenase|CYP17A1-related condition	germline	germline	GRCh37	NC_000010.10	10	104590739	104590739	na	na	10q24.32	criteria provided, multiple submitters, no conflicts	4	-	N	ClinGen:CA115203,OMIM:609300.0031	3	1804	104590739	C	T	CYP17A1:NM_000102:exon8:c.G1247A:p.R416H	0.0	pathogenic	0.0	pathogenic	1.0	pathogenic	1.0	pathogenic	2.24	pathogenic	0.87	pathogenic	-3.33	pathogenic
CHD7	17061	single nucleotide variant	NM_017780.4(CHD7):c.3082A>G (p.Ile1028Val)	55636	CHD7	HGNC:20626	Pathogenic/Likely pathogenic	1	Mar 02, 2023	121434338	-	RCV000002100|RCV000081828|RCV000763598|RCV002287316	MONDO:MONDO:0008965,MedGen:C0265354,OMIM:214800,Orphanet:138|MedGen:C3661900|MONDO:MONDO:0012880,MedGen:C3552553,OMIM:612370,Orphanet:478;MONDO:MONDO:0008965,MedGen:C0265354,OMIM:214800,Orphanet:138|Human Phenotype Ontology:HP:0000044,Human Phenotype Ontology:HP:0003335,Human Phenotype Ontology:HP:0008224,MONDO:MONDO:0018555,MedGen:C0271623,OMIM:PS147950,Orphanet:432	CHARGE association|not provided|Hypogonadotropic hypogonadism 5 with or without anosmia;CHARGE association|Hypogonadotropic hypogonadism	germline;unknown	germline	GRCh37	NC_000008.10	8	61735186	61735186	na	na	8q12.2	criteria provided, multiple submitters, no conflicts	7	-	N	ClinGen:CA223285,UniProtKB:Q9P2D1#VAR_021059,OMIM:608892.0001	3	2022	61735186	A	G	CHD7:NM_017780:exon12:c.A3082G:p.I1028V	0.041	pathogenic	0.0	pathogenic	0.752	pathogenic	0.894	pathogenic	-0.04	benign	0.93	pathogenic	-3.22	pathogenic
SETX	17327	single nucleotide variant	NM_015046.7(SETX):c.994C>T (p.Arg332Trp)	23064	SETX	HGNC:445	Pathogenic/Likely pathogenic	1	Feb 08, 2023	29001665	-	RCV000002378|RCV000269785	MONDO:MONDO:0018996,MedGen:C1853761,OMIM:606002,Orphanet:64753|MedGen:CN517202	Spinocerebellar ataxia, autosomal recessive, with axonal neuropathy 2|not provided	germline	germline	GRCh37	NC_000009.11	9	135206680	135206680	na	na	9q34.13	criteria provided, multiple submitters, no conflicts	5	-	N	OMIM:608465.0005,ClinGen:CA252181,UniProtKB:Q7Z333#VAR_018778	3	2288	135206680	G	A	SETX:NM_001351527:exon8:c.C994T:p.R332W,SETX:NM_001351528:exon8:c.C994T:p.R332W,SETX:NM_015046:exon8:c.C994T:p.R332W	0.0	pathogenic	0.001	pathogenic	1.0	pathogenic	0.998	pathogenic	1.04	pathogenic	0.97	pathogenic	-0.13	benign
SETX	17328	single nucleotide variant	NM_015046.7(SETX):c.1166T>C (p.Leu389Ser)	23064	SETX	HGNC:445	Pathogenic	1	Mar 02, 2023	29001584	-	RCV000002379|RCV000644828|RCV000724322|RCV000789615|RCV003233065	MONDO:MONDO:0011223,MedGen:C1865409,OMIM:602433,Orphanet:357043|MONDO:MONDO:0018996,MedGen:C1853761,OMIM:606002,Orphanet:64753;MONDO:MONDO:0011223,MedGen:C1865409,OMIM:602433,Orphanet:357043|MedGen:CN517202|MONDO:MONDO:0018894,MedGen:C0393541,Orphanet:53739|MONDO:MONDO:0018996,MedGen:C1853761,OMIM:606002,Orphanet:64753	Amyotrophic lateral sclerosis type 4|Spinocerebellar ataxia, autosomal recessive, with axonal neuropathy 2;Amyotrophic lateral sclerosis type 4|not provided|Distal spinal muscular atrophy|Spinocerebellar ataxia, autosomal recessive, with axonal neuropathy 2	germline	germline	GRCh37	NC_000009.11	9	135205819	135205819	na	na	9q34.13	criteria provided, multiple submitters, no conflicts	7	-	N	ClinGen:CA252183,UniProtKB:Q7Z333#VAR_018779,OMIM:608465.0006	3	2289	135205819	A	G	SETX:NM_001351527:exon10:c.T1166C:p.L389S,SETX:NM_001351528:exon10:c.T1166C:p.L389S,SETX:NM_015046:exon10:c.T1166C:p.L389S	0.0	pathogenic	0.0	pathogenic	1.0	pathogenic	0.997	pathogenic	1.04	pathogenic	0.91	pathogenic	-2.24	pathogenic
SETX	17329	single nucleotide variant	NM_015046.7(SETX):c.8C>T (p.Thr3Ile)	23064	SETX	HGNC:445	Likely pathogenic	1	Aug 02, 2016	28941475	-	RCV000002380|RCV000414273|RCV000789614	MONDO:MONDO:0011223,MedGen:C1865409,OMIM:602433,Orphanet:357043|MedGen:CN517202|MONDO:MONDO:0018894,MedGen:C0393541,Orphanet:53739	Amyotrophic lateral sclerosis type 4|not provided|Distal spinal muscular atrophy	germline	germline	GRCh37	NC_000009.11	9	135224808	135224808	na	na	9q34.13	criteria provided, single submitter	5	-	N	OMIM:608465.0007,ClinGen:CA252185,UniProtKB:Q7Z333#VAR_018776	3	2290	135224808	G	A	SETX:NM_001351527:exon3:c.C8T:p.T3I,SETX:NM_001351528:exon3:c.C8T:p.T3I,SETX:NM_015046:exon3:c.C8T:p.T3I	0.002	pathogenic	0.071	benign	0.995	pathogenic	0.911	pathogenic	0.895	pathogenic	0.97	pathogenic	-2.21	pathogenic
SETX	17331	single nucleotide variant	NM_015046.7(SETX):c.5927T>G (p.Leu1976Arg)	23064	SETX	HGNC:445	Pathogenic	1	Apr 28, 2022	121434379	-	RCV000002382|RCV001781169	MONDO:MONDO:0018996,MedGen:C1853761,OMIM:606002,Orphanet:64753|MedGen:CN517202	Spinocerebellar ataxia, autosomal recessive, with axonal neuropathy 2|not provided	germline	germline	GRCh37	NC_000009.11	9	135172296	135172296	na	na	9q34.13	criteria provided, multiple submitters, no conflicts	4	-	N	ClinGen:CA252189,UniProtKB:Q7Z333#VAR_072588,OMIM:608465.0009	3	2292	135172296	A	C	SETX:NM_001351527:exon14:c.T5927G:p.L1976R,SETX:NM_001351528:exon14:c.T5927G:p.L1976R,SETX:NM_015046:exon14:c.T5927G:p.L1976R	0.0	pathogenic	0.001	pathogenic	0.999	pathogenic	0.983	pathogenic	3.915	pathogenic	0.98	pathogenic	-1.4	benign
SETX	17332	single nucleotide variant	NM_015046.7(SETX):c.1807A>G (p.Asn603Asp)	23064	SETX	HGNC:445	Benign/Likely benign	0	Oct 01, 2023	116205032	-	RCV000644848|RCV001085644|RCV001848884|RCV003233662|RCV003233663	MedGen:C3661900|MONDO:MONDO:0018996,MedGen:C1853761,OMIM:606002,Orphanet:64753;MONDO:MONDO:0011223,MedGen:C1865409,OMIM:602433,Orphanet:357043|MONDO:MONDO:0019064,MedGen:C0037773,OMIM:PS303350,Orphanet:685|MONDO:MONDO:0018996,MedGen:C1853761,OMIM:606002,Orphanet:64753|MONDO:MONDO:0011223,MedGen:C1865409,OMIM:602433,Orphanet:357043	not provided|Spinocerebellar ataxia, autosomal recessive, with axonal neuropathy 2;Amyotrophic lateral sclerosis type 4|Hereditary spastic paraplegia|Spinocerebellar ataxia, autosomal recessive, with axonal neuropathy 2|Amyotrophic lateral sclerosis type 4	germline	germline	GRCh37	NC_000009.11	9	135205178	135205178	na	na	9q34.13	criteria provided, multiple submitters, no conflicts	6	-	N	ClinGen:CA026956,UniProtKB:Q7Z333#VAR_036647,OMIM:608465.0010,ClinVar:441280	2	446186	135205178	T	C	SETX:NM_001351527:exon10:c.A1807G:p.N603D,SETX:NM_001351528:exon10:c.A1807G:p.N603D,SETX:NM_015046:exon10:c.A1807G:p.N603D	0.009	pathogenic	0.027	pathogenic	0.156	benign	0.026	benign	1.245	pathogenic	0.18	benign	-2.09	pathogenic
SETX	17334	single nucleotide variant	NM_015046.7(SETX):c.5929C>T (p.Leu1977Phe)	23064	SETX	HGNC:445	Likely pathogenic	1	Feb 08, 2023	121434380	-	RCV000002385|RCV001288413	MONDO:MONDO:0018996,MedGen:C1853761,OMIM:606002,Orphanet:64753|MedGen:CN517202	Spinocerebellar ataxia, autosomal recessive, with axonal neuropathy 2|not provided	germline;unknown	germline	GRCh37	NC_000009.11	9	135172294	135172294	na	na	9q34.13	criteria provided, multiple submitters, no conflicts	4	-	N	ClinGen:CA252191,OMIM:608465.0012	3	2295	135172294	G	A	SETX:NM_001351527:exon14:c.C5929T:p.L1977F,SETX:NM_001351528:exon14:c.C5929T:p.L1977F,SETX:NM_015046:exon14:c.C5929T:p.L1977F	0.0	pathogenic	0.0	pathogenic	1.0	pathogenic	0.999	pathogenic	2.56	pathogenic	0.92	pathogenic	-1.7	pathogenic
SOX9	17553	single nucleotide variant	NM_000346.4(SOX9):c.227C>A (p.Ala76Glu)	6662	SOX9	HGNC:11204	Pathogenic	1	Jun 05, 2018	137853128	-	RCV000002621|RCV001266938	MedGen:C1861923|MeSH:D030342,MedGen:C0950123	Acampomelic campomelic dysplasia|Inborn genetic diseases	germline	germline	GRCh37	NC_000017.10	17	70117759	70117759	na	na	17q24.3	criteria provided, single submitter	2	-	N	ClinGen:CA115587,UniProtKB:P48436#VAR_063642,OMIM:608160.0009	3	2514	70117759	C	A	SOX9:NM_000346:exon1:c.C227A:p.A76E	0.0	pathogenic	0.001	pathogenic	1.0	pathogenic	0.999	pathogenic	2.865	pathogenic	0.95	pathogenic	-2.98	pathogenic
SOX9	17556	single nucleotide variant	NM_000346.4(SOX9):c.472G>A (p.Ala158Thr)	6662	SOX9	HGNC:11204	Likely pathogenic	1	Aug 20, 2021	137853130	-	RCV000002624|RCV001851587	MedGen:C1842462|MONDO:MONDO:0007251,MedGen:C1861922,OMIM:114290,Orphanet:140	Campomelic dysplasia with autosomal sex reversal|Camptomelic dysplasia	germline	germline	GRCh37	NC_000017.10	17	70118900	70118900	na	na	17q24.3	criteria provided, single submitter	2	-	N	ClinGen:CA115588,UniProtKB:P48436#VAR_008530,OMIM:608160.0012	3	2517	70118900	G	A	SOX9:NM_000346:exon2:c.G472A:p.A158T	0.007	pathogenic	0.008	pathogenic	0.896	pathogenic	0.575	pathogenic	4.29	pathogenic	0.98	pathogenic	-3.83	pathogenic
ATM	18062	single nucleotide variant	NM_000051.4(ATM):c.7271T>G (p.Val2424Gly)	472	ATM	HGNC:795	Pathogenic	1	Mar 09, 2022	28904921	-	RCV000003160|RCV000003161|RCV000003159|RCV000115244|RCV000168223|RCV000212060|RCV000417259|RCV000515429|RCV000709707|RCV003149562	MONDO:MONDO:0019468,MedGen:C2363142,Orphanet:86871|MedGen:C3469522|MONDO:MONDO:0018266,MedGen:C1876175,Orphanet:370109|MONDO:MONDO:0015356,MeSH:D009386,MedGen:C0027672,Orphanet:140162|MONDO:MONDO:0008840,MedGen:C0004135,OMIM:208900,Orphanet:100|MedGen:C3661900|Human Phenotype Ontology:HP:0010623,Human Phenotype Ontology:HP:0100013,MONDO:MONDO:0021100,MeSH:D001943,MedGen:C1458155|MONDO:MONDO:00088…	T-cell prolymphocytic leukemia|Breast cancer, susceptibility to|Ataxia - telangiectasia variant|Hereditary cancer-predisposing syndrome|Ataxia-telangiectasia syndrome|not provided|Breast neoplasm|Ataxia-telangiectasia syndrome;Familial cancer of breast|Familial cancer of breast|Breast and/or ovarian cancer	germline;paternal;somatic;unknown	germline/somatic	GRCh37	NC_000011.9	11	108199929	108199929	na	na	11q22.3	reviewed by expert panel	28	-	N	ClinGen:CA115930,UniProtKB:Q13315#VAR_010854,OMIM:607585.0005	3	3023	108199929	T	G	ATM:NM_000051:exon49:c.T7271G:p.V2424G,ATM:NM_001351834:exon50:c.T7271G:p.V2424G	0.001	pathogenic	0.001	pathogenic	1.0	pathogenic	0.996	pathogenic	2.535	pathogenic	0.97	pathogenic	-0.81	benign
ATM	18066	single nucleotide variant	NM_000051.4(ATM):c.3118A>G (p.Met1040Val)	472	ATM	HGNC:795	Benign	1	Mar 09, 2022	3092857	-	RCV000003166|RCV000116423|RCV000123734|RCV000203947|RCV000224788|RCV001797989|RCV002221465|RCV002225257	MONDO:MONDO:0015759,MedGen:CN228979,Orphanet:171915|MedGen:CN169374|MONDO:MONDO:0015356,MeSH:D009386,MedGen:C0027672,Orphanet:140162|MONDO:MONDO:0008840,MedGen:C0004135,OMIM:208900,Orphanet:100|MedGen:C3661900|MedGen:CN221562|MONDO:MONDO:0016419,MedGen:C0346153,OMIM:114480,Orphanet:227535|MONDO:MONDO:0003582,MeSH:D061325,MedGen:C0677776,Orphanet:145	B-cell non-Hodgkin lymphoma|not specified|Hereditary cancer-predisposing syndrome|Ataxia-telangiectasia syndrome|not provided|Breast and/or ovarian cancer|Familial cancer of breast|Hereditary breast ovarian cancer syndrome	germline;somatic;unknown	germline/somatic	GRCh37	NC_000011.9	11	108143299	108143299	na	na	11q22.3	reviewed by expert panel	27	-	N	ClinGen:CA151920,UniProtKB:Q13315#VAR_010817,OMIM:607585.0010	3	3027	108143299	A	G	ATM:NM_000051:exon21:c.A3118G:p.M1040V,ATM:NM_001351834:exon22:c.A3118G:p.M1040V	1.0	benign	1.0	benign	0.0	benign	0.0	benign	0.49	benign	0.01	benign	-0.34	benign
ATM	18087	single nucleotide variant	NM_000051.4(ATM):c.146C>G (p.Ser49Cys)	472	ATM	HGNC:795	Benign	0	Mar 09, 2022	1800054	-	RCV000003189|RCV000128940|RCV000122818|RCV000176968|RCV000224620|RCV001357240|RCV001353116|RCV002221467|RCV002225258	MedGen:C3469522|MONDO:MONDO:0015356,MeSH:D009386,MedGen:C0027672,Orphanet:140162|MONDO:MONDO:0008840,MedGen:C0004135,OMIM:208900,Orphanet:100|MedGen:CN169374|MedGen:C3661900|MONDO:MONDO:0007254,MedGen:C0006142|Human Phenotype Ontology:HP:0002394,Human Phenotype Ontology:HP:0030051,Human Phenotype Ontology:HP:0040083,MedGen:C0427144|MONDO:MONDO:0016419,MedGen:C0346153,OMIM:114480,Orphanet:227535|M…	Breast cancer, susceptibility to|Hereditary cancer-predisposing syndrome|Ataxia-telangiectasia syndrome|not specified|not provided|Malignant tumor of breast|Tip-toe gait|Familial cancer of breast|Hereditary breast ovarian cancer syndrome	germline;unknown	germline	GRCh37	NC_000011.9	11	108098576	108098576	na	na	11q22.3	reviewed by expert panel	33	-	N	ClinGen:CA202190,UniProtKB:Q13315#VAR_010798,OMIM:607585.0032	3	3048	108098576	C	G	ATM:NM_000051:exon3:c.C146G:p.S49C,ATM:NM_001351835:exon3:c.C146G:p.S49C,ATM:NM_001351836:exon3:c.C146G:p.S49C,ATM:NM_001351834:exon4:c.C146G:p.S49C	0.002	pathogenic	0.004	pathogenic	0.98	pathogenic	0.739	pathogenic	2.28	pathogenic	0.06	benign	4.44	benign
LRPPRC	18149	single nucleotide variant	NM_133259.4(LRPPRC):c.1061C>T (p.Ala354Val)	10128	LRPPRC	HGNC:15714	Pathogenic	1	Sep 07, 2022	119466000	-	RCV000003257|RCV000796281	MONDO:MONDO:0009069,MedGen:C1857355,OMIM:220111,Orphanet:70472|MedGen:CN517202	Congenital lactic acidosis, Saguenay-Lac-Saint-Jean type|not provided	germline;unknown	germline	GRCh37	NC_000002.11	2	44201383	44201383	na	na	2p21	criteria provided, multiple submitters, no conflicts	8	-	N	ClinGen:CA210483,UniProtKB:P42704#VAR_018656,OMIM:607544.0001	3	3110	44201383	G	A	LRPPRC:NM_133259:exon9:c.C1061T:p.A354V	0.003	pathogenic	0.005	pathogenic	0.998	pathogenic	0.646	pathogenic	3.09	pathogenic	0.89	pathogenic	0.11	benign
MC2R	18297	single nucleotide variant	NM_000529.2(MC2R):c.221G>T (p.Ser74Ile)	4158	MC2R	HGNC:6930	Pathogenic	1	Jan 07, 2023	104894658	-	RCV000003414|RCV000583288|RCV002512707	MONDO:MONDO:0024536,MedGen:C4049650,OMIM:202200,Orphanet:361|MedGen:C1955741|MedGen:C3661900	Glucocorticoid deficiency 1|Glucocorticoid Deficiency|not provided	germline;unknown	germline	GRCh37	NC_000018.9	18	13885297	13885297	na	na	18p11.21	criteria provided, multiple submitters, no conflicts	7	-	N	ClinGen:CA116116,UniProtKB:Q01718#VAR_003510,OMIM:607397.0001	3	3258	13885297	C	A	MC2R:NM_000529:exon2:c.G221T:p.S74I,MC2R:NM_001291911:exon2:c.G221T:p.S74I	0.0	pathogenic	0.001	pathogenic	1.0	pathogenic	0.995	pathogenic	3.3	pathogenic	0.92	pathogenic	1.13	benign
MC2R	18304	single nucleotide variant	NM_000529.2(MC2R):c.409C>T (p.Arg137Trp)	4158	MC2R	HGNC:6930	Pathogenic	1	Sep 02, 2021	104894660	-	RCV000003421|RCV000584506|RCV001851615	MONDO:MONDO:0024536,MedGen:C4049650,OMIM:202200,Orphanet:361|MedGen:C1955741|MedGen:CN517202	Glucocorticoid deficiency 1|Glucocorticoid Deficiency|not provided	germline	germline	GRCh37	NC_000018.9	18	13885109	13885109	na	na	18p11.21	criteria provided, single submitter	3	-	N	ClinGen:CA116123,UniProtKB:Q01718#VAR_010703,OMIM:607397.0008	3	3265	13885109	G	A	MC2R:NM_000529:exon2:c.C409T:p.R137W,MC2R:NM_001291911:exon2:c.C409T:p.R137W	0.0	pathogenic	0.0	pathogenic	0.994	pathogenic	0.851	pathogenic	2.76	pathogenic	0.77	pathogenic	0.99	benign
AIRE	18347	single nucleotide variant	NM_000383.4(AIRE):c.247A>G (p.Lys83Glu)	326	AIRE	HGNC:360	Likely pathogenic	1	Jun 23, 2022	121434255	-	RCV000003471	MONDO:MONDO:0009411,MedGen:C0085859,OMIM:240300,Orphanet:3453	Polyglandular autoimmune syndrome, type 1	germline	germline	GRCh37	NC_000021.8	21	45706554	45706554	na	na	21q22.3	criteria provided, single submitter	2	-	N	ClinGen:CA116137,UniProtKB:O43918#VAR_005005,OMIM:607358.0002	3	3308	45706554	A	G	AIRE:NM_000383:exon2:c.A247G:p.K83E	0.095	benign	0.0	pathogenic	0.999	pathogenic	0.995	pathogenic	2.16	pathogenic	0.37	benign	-3.44	pathogenic
AIRE	18353	single nucleotide variant	NM_000383.4(AIRE):c.1A>T (p.Met1Leu)	326	AIRE	HGNC:360	Pathogenic	1	Apr 14, 2022	121434258	-	RCV000003478|RCV001091469	MONDO:MONDO:0009411,MedGen:C0085859,OMIM:240300,Orphanet:3453|MedGen:C3661900	Polyglandular autoimmune syndrome, type 1|not provided	germline;unknown	germline	GRCh37	NC_000021.8	21	45705890	45705890	na	na	21q22.3	criteria provided, multiple submitters, no conflicts	5	-	N	ClinGen:CA116147,OMIM:607358.0008	3	3314	45705890	A	T	AIRE:NM_000383:exon1:c.A1T:p.M1L	1.0	benign	1.0	benign	0.002	benign	0.002	benign	-	-	0.965	pathogenic	-3.29	pathogenic
SRD5A2	18376	single nucleotide variant	NM_000348.4(SRD5A2):c.736C>T (p.Arg246Trp)	6716	SRD5A2	HGNC:11285	Pathogenic	1	Aug 27, 2022	121434244	-	RCV000003501|RCV001574452	MONDO:MONDO:0009923,MedGen:C0268297,OMIM:264600,Orphanet:753|MedGen:CN517202	3-Oxo-5 alpha-steroid delta 4-dehydrogenase deficiency|not provided	germline	germline	GRCh37	NC_000002.11	2	31751295	31751295	na	na	2p23.1	criteria provided, multiple submitters, no conflicts	3	-	N	ClinGen:CA340064,OMIM:607306.0002	3	3337	31751295	G	A	SRD5A2:NM_000348:exon5:c.C736T:p.R246W	-	-	0.0	pathogenic	0.998	pathogenic	0.975	pathogenic	3.49	pathogenic	-	-	-	-
SRD5A2	18378	single nucleotide variant	NM_000348.4(SRD5A2):c.164T>A (p.Leu55Gln)	6716	SRD5A2	HGNC:11285	Pathogenic/Likely pathogenic	1	Jul 10, 2021	121434245	-	RCV000003503|RCV001269601|RCV001813943	MONDO:MONDO:0009923,MedGen:C0268297,OMIM:264600,Orphanet:753|MedGen:CN517202|Human Phenotype Ontology:HP:0000119,Human Phenotype Ontology:HP:0008658,Human Phenotype Ontology:HP:0008688,Human Phenotype Ontology:HP:0008704,Human Phenotype Ontology:HP:0008713,MedGen:C0042063	3-Oxo-5 alpha-steroid delta 4-dehydrogenase deficiency|not provided|Abnormality of the genitourinary system	germline	germline	GRCh37	NC_000002.11	2	31805807	31805807	na	na	2p23.1	criteria provided, multiple submitters, no conflicts	4	-	N	ClinGen:CA340068,OMIM:607306.0004	3	3339	31805807	A	T	SRD5A2:NM_000348:exon1:c.T164A:p.L55Q	-	-	0.002	pathogenic	1.0	pathogenic	0.95	pathogenic	2.85	pathogenic	-	-	-	-
SRD5A2	18379	single nucleotide variant	NM_000348.4(SRD5A2):c.344G>A (p.Gly115Asp)	6716	SRD5A2	HGNC:11285	Pathogenic/Likely pathogenic	1	Aug 31, 2021	121434246	-	RCV000003504	MONDO:MONDO:0009923,MedGen:C0268297,OMIM:264600,Orphanet:753	3-Oxo-5 alpha-steroid delta 4-dehydrogenase deficiency	germline;unknown	germline	GRCh37	NC_000002.11	2	31758774	31758774	na	na	2p23.1	criteria provided, multiple submitters, no conflicts	4	-	N	ClinGen:CA340070,OMIM:607306.0005	3	3340	31758774	C	T	SRD5A2:NM_000348:exon2:c.G344A:p.G115D	-	-	0.035	pathogenic	0.999	pathogenic	0.979	pathogenic	3.18	pathogenic	-	-	-	-
SRD5A2	18380	single nucleotide variant	NM_000348.4(SRD5A2):c.547G>A (p.Gly183Ser)	6716	SRD5A2	HGNC:11285	Pathogenic	1	Aug 24, 2021	121434247	-	RCV000003505	MONDO:MONDO:0009923,MedGen:C0268297,OMIM:264600,Orphanet:753	3-Oxo-5 alpha-steroid delta 4-dehydrogenase deficiency	germline	germline	GRCh37	NC_000002.11	2	31756441	31756441	na	na	2p23.1	criteria provided, single submitter	3	-	N	ClinGen:CA340072,OMIM:607306.0006	3	3341	31756441	C	T	SRD5A2:NM_000348:exon3:c.G547A:p.G183S	-	-	0.0	pathogenic	1.0	pathogenic	1.0	pathogenic	3.25	pathogenic	-	-	-	-
SRD5A2	18383	single nucleotide variant	NM_000348.4(SRD5A2):c.682G>A (p.Ala228Thr)	6716	SRD5A2	HGNC:11285	Pathogenic	1	Aug 12, 2021	121434249	-	RCV000003508|RCV001270015	MONDO:MONDO:0009923,MedGen:C0268297,OMIM:264600,Orphanet:753|MedGen:CN517202	3-Oxo-5 alpha-steroid delta 4-dehydrogenase deficiency|not provided	germline	germline	GRCh37	NC_000002.11	2	31754393	31754393	na	na	2p23.1	criteria provided, multiple submitters, no conflicts	7	-	N	OMIM:607306.0009,ClinGen:CA340077	3	3344	31754393	C	T	SRD5A2:NM_000348:exon4:c.G682A:p.A228T	-	-	0.003	pathogenic	1.0	pathogenic	1.0	pathogenic	4.485	pathogenic	-	-	-	-
SRD5A2	18385	single nucleotide variant	NM_000348.4(SRD5A2):c.692A>G (p.His231Arg)	6716	SRD5A2	HGNC:11285	Pathogenic	1	Oct 21, 2022	121434251	-	RCV000003510|RCV001552751	MONDO:MONDO:0009923,MedGen:C0268297,OMIM:264600,Orphanet:753|MedGen:CN517202	3-Oxo-5 alpha-steroid delta 4-dehydrogenase deficiency|not provided	germline	germline	GRCh37	NC_000002.11	2	31754383	31754383	na	na	2p23.1	criteria provided, multiple submitters, no conflicts	7	-	N	ClinGen:CA340081,OMIM:607306.0011	3	3346	31754383	T	C	SRD5A2:NM_000348:exon4:c.A692G:p.H231R	-	-	0.0	pathogenic	1.0	pathogenic	1.0	pathogenic	3.55	pathogenic	-	-	-	-
SRD5A2	18386	single nucleotide variant	NM_000348.4(SRD5A2):c.145G>A (p.Ala49Thr)	6716	SRD5A2	HGNC:11285	Benign	1	Nov 01, 2022	9282858	-	RCV000003511|RCV000083640|RCV000531645	|MedGen:CN517202|MONDO:MONDO:0009923,MedGen:C0268297,OMIM:264600,Orphanet:753	STEROID 5-ALPHA-REDUCTASE POLYMORPHISM|not provided|3-Oxo-5 alpha-steroid delta 4-dehydrogenase deficiency	germline	germline	GRCh37	NC_000002.11	2	31805826	31805826	na	na	2p23.1	criteria provided, multiple submitters, no conflicts	5	-	N	ClinGen:CA116154,OMIM:607306.0012	3	3347	31805826	C	T	SRD5A2:NM_000348:exon1:c.G145A:p.A49T	-	-	0.005	pathogenic	0.981	pathogenic	0.564	pathogenic	2.98	pathogenic	-	-	-	-
SRD5A2	18387	single nucleotide variant	NM_000348.4(SRD5A2):c.635C>G (p.Pro212Arg)	6716	SRD5A2	HGNC:11285	Pathogenic	1	Aug 13, 2021	121434252	-	RCV000003512	MONDO:MONDO:0009923,MedGen:C0268297,OMIM:264600,Orphanet:753	3-Oxo-5 alpha-steroid delta 4-dehydrogenase deficiency	germline	germline	GRCh37	NC_000002.11	2	31754440	31754440	na	na	2p23.1	criteria provided, single submitter	3	-	N	ClinGen:CA340083,OMIM:607306.0013	3	3348	31754440	G	C	SRD5A2:NM_000348:exon4:c.C635G:p.P212R	-	-	0.026	pathogenic	1.0	pathogenic	0.997	pathogenic	3.29	pathogenic	-	-	-	-
SRD5A2	18388	single nucleotide variant	NM_000348.4(SRD5A2):c.591G>T (p.Glu197Asp)	6716	SRD5A2	HGNC:11285	Pathogenic	1	Jul 07, 2022	121434253	-	RCV000003513	MONDO:MONDO:0009923,MedGen:C0268297,OMIM:264600,Orphanet:753	3-Oxo-5 alpha-steroid delta 4-dehydrogenase deficiency	germline	germline	GRCh37	NC_000002.11	2	31754484	31754484	na	na	2p23.1	criteria provided, single submitter	2	-	N	ClinGen:CA340085,OMIM:607306.0014	3	3349	31754484	C	A	SRD5A2:NM_000348:exon4:c.G591T:p.E197D	-	-	0.0	pathogenic	1.0	pathogenic	0.999	pathogenic	4.58	pathogenic	-	-	-	-
SRD5A2	18390	single nucleotide variant	NM_000348.4(SRD5A2):c.680G>A (p.Arg227Gln)	6716	SRD5A2	HGNC:11285	Pathogenic/Likely pathogenic	1	Oct 26, 2022	9332964	-	RCV000003515|RCV000083663|RCV000288398|RCV003313913	Human Phenotype Ontology:HP:0000038,Human Phenotype Ontology:HP:0000054,MedGen:C4551492|MedGen:CN517202|MONDO:MONDO:0009923,MedGen:C0268297,OMIM:264600,Orphanet:753|MONDO:MONDO:0005258,MeSH:D000067877,MedGen:C1510586,Orphanet:106	Micropenis|not provided|3-Oxo-5 alpha-steroid delta 4-dehydrogenase deficiency|Autism spectrum disorder	germline;inherited;unknown	germline	GRCh37	NC_000002.11	2	31754395	31754395	na	na	2p23.1	criteria provided, multiple submitters, no conflicts	12	-	N	ClinGen:CA116158,OMIM:607306.0016,ClinVar:427837,ClinVar:427841	3	3351	31754395	C	T	SRD5A2:NM_000348:exon4:c.G680A:p.R227Q	-	-	0.044	pathogenic	0.956	pathogenic	0.519	pathogenic	3.16	pathogenic	-	-	-	-
PAX6	18509	single nucleotide variant	NM_001368894.2(PAX6):c.424C>T (p.Arg142Cys)	5080	PAX6	HGNC:8620	Pathogenic	1	Sep 28, 2022	121907918	-	RCV000003635|RCV000984410|RCV001851621	MONDO:MONDO:0007628,MedGen:C3805604,OMIM:136520,Orphanet:2253|MONDO:MONDO:0024507,MedGen:C0344542,OMIM:106210,Orphanet:250923|Human Phenotype Ontology:HP:0000659,MONDO:MONDO:0011414,MedGen:C0344559,OMIM:604229,Orphanet:708;MONDO:MONDO:0024507,MedGen:C0344542,OMIM:106210,Orphanet:250923	Foveal hypoplasia 1|Aniridia 1|Irido-corneo-trabecular dysgenesis;Aniridia 1	germline;inherited	germline	GRCh37	NC_000011.9	11	31822380	31822380	na	na	11p13	criteria provided, single submitter	3	-	N	ClinGen:CA116221,UniProtKB:P26367#VAR_003814,OMIM:607108.0012	3	3470	31822380	G	A	PAX6:NM_001310159:exon5:c.C382T:p.R128C,PAX6:NM_001368911:exon5:c.C427T:p.R143C,PAX6:NM_001258465:exon6:c.C382T:p.R128C,PAX6:NM_001368889:exon6:c.C382T:p.R128C,PAX6:NM_001368891:exon6:c.C382T:p.R128C,PAX6:NM_001368916:exon6:c.C382T:p.R128C,PAX6:NM_001368920:exon6:c.C457T:p.R153C,PAX6:NM_001368928:exon6:c.C181T:p.R61C,PAX6:NM_000280:exon7:c.C382T:p.R128C,PAX6:NM_001127612:exon7:c.C382T:p.R128C,PAX…	0.0	pathogenic	0.0	pathogenic	0.999	pathogenic	0.913	pathogenic	3.535	pathogenic	1.0	pathogenic	-6.38	pathogenic
PAX6	18510	single nucleotide variant	NM_001368894.2(PAX6):c.419T>A (p.Val140Asp)	5080	PAX6	HGNC:8620	Likely pathogenic	1	Jul 18, 2022	121907919	-	RCV000003636|RCV002512714	MedGen:C4017066|MONDO:MONDO:0024507,MedGen:C0344542,OMIM:106210,Orphanet:250923;Human Phenotype Ontology:HP:0000659,MONDO:MONDO:0011414,MedGen:C0344559,OMIM:604229,Orphanet:708	Aniridia, atypical|Aniridia 1;Irido-corneo-trabecular dysgenesis	germline	germline	GRCh37	NC_000011.9	11	31822385	31822385	na	na	11p13	criteria provided, single submitter	2	-	N	ClinGen:CA116224,UniProtKB:P26367#VAR_008705,OMIM:607108.0013	3	3471	31822385	A	T	PAX6:NM_001310159:exon5:c.T377A:p.V126D,PAX6:NM_001368911:exon5:c.T422A:p.V141D,PAX6:NM_001258465:exon6:c.T377A:p.V126D,PAX6:NM_001368889:exon6:c.T377A:p.V126D,PAX6:NM_001368891:exon6:c.T377A:p.V126D,PAX6:NM_001368916:exon6:c.T377A:p.V126D,PAX6:NM_001368920:exon6:c.T452A:p.V151D,PAX6:NM_001368928:exon6:c.T176A:p.V59D,PAX6:NM_000280:exon7:c.T377A:p.V126D,PAX6:NM_001127612:exon7:c.T377A:p.V126D,PAX…	0.0	pathogenic	0.0	pathogenic	0.999	pathogenic	0.928	pathogenic	2.74	pathogenic	1.0	pathogenic	-6.03	pathogenic
PAX6	18520	single nucleotide variant	NM_001368894.2(PAX6):c.399C>A (p.Ser133Arg)	5080	PAX6	HGNC:8620	Likely pathogenic	1	Jan 20, 2023	121907928	-	RCV000003650|RCV003105769	MONDO:MONDO:0024507,MedGen:C0344542,OMIM:106210,Orphanet:250923|MedGen:C3661900	Aniridia 1|not provided	germline	germline	GRCh37	NC_000011.9	11	31823109	31823109	na	na	11p13	criteria provided, single submitter	2	-	N	ClinGen:CA252805,UniProtKB:P26367#VAR_008704,OMIM:607108.0023	3	3481	31823109	G	T	PAX6:NM_001310159:exon4:c.C357A:p.S119R,PAX6:NM_001368911:exon4:c.C402A:p.S134R,PAX6:NM_001258465:exon5:c.C357A:p.S119R,PAX6:NM_001368889:exon5:c.C357A:p.S119R,PAX6:NM_001368891:exon5:c.C357A:p.S119R,PAX6:NM_001368916:exon5:c.C357A:p.S119R,PAX6:NM_001368920:exon5:c.C432A:p.S144R,PAX6:NM_000280:exon6:c.C357A:p.S119R,PAX6:NM_001127612:exon6:c.C357A:p.S119R,PAX6:NM_001258464:exon6:c.C357A:p.S119R,PA…	0.0	pathogenic	0.001	pathogenic	1.0	pathogenic	1.0	pathogenic	3.18	pathogenic	0.99	pathogenic	-6.31	pathogenic
WT1	18526	single nucleotide variant	NM_024426.6(WT1):c.1399C>T (p.Arg467Trp)	7490	WT1	HGNC:12796	Pathogenic	1	Feb 01, 2023	121907900	-	RCV000003656|RCV000003658|RCV000003657|RCV000467701|RCV000484426|RCV001003819|RCV001290016|RCV002293973|RCV002482821	MONDO:MONDO:0008682,MedGen:C0950121,OMIM:194080,Orphanet:220|MONDO:MONDO:0009733,MedGen:C3151568,OMIM:256370,Orphanet:656|MONDO:MONDO:0012164,MedGen:C1837026,OMIM:608978,Orphanet:3097|MONDO:MONDO:0007635,MeSH:D052159,MedGen:C0950122,OMIM:136680,Orphanet:347;MONDO:MONDO:0008682,MedGen:C0950121,OMIM:194080,Orphanet:220;MONDO:MONDO:0008679,MedGen:CN033288,OMIM:194070,Orphanet:654;MONDO:MONDO:0008681…	Drash syndrome|Nephrotic syndrome, type 4|Meacham syndrome|Frasier syndrome;Drash syndrome;Wilms tumor 1;11p partial monosomy syndrome|not provided|Nephrotic range proteinuria;Steroid-resistant nephrotic syndrome|Wilms tumor 1|Kidney disorder|8 conditions	germline;unknown	germline	GRCh37	NC_000011.9	11	32413566	32413566	na	na	11p13	criteria provided, multiple submitters, no conflicts	12	ACMG2013,ACMG2016,ACMG2021,ACMG2022	N	ClinGen:CA016324,OMIM:607102.0003	3	3487	32413566	G	A	WT1:NM_001367854:exon5:c.C211T:p.R71W,WT1:NM_000378:exon8:c.C1348T:p.R450W,WT1:NM_001198552:exon8:c.C697T:p.R233W,WT1:NM_001198551:exon9:c.C748T:p.R250W,WT1:NM_024424:exon9:c.C1399T:p.R467W,WT1:NM_024426:exon9:c.C1399T:p.R467W	0.0	pathogenic	0.0	pathogenic	1.0	pathogenic	1.0	pathogenic	1.7	pathogenic	0.93	pathogenic	3.19	benign
WT1	18527	single nucleotide variant	NM_024426.6(WT1):c.1316G>A (p.Arg439His)	7490	WT1	HGNC:12796	Pathogenic	1	Jan 17, 2022	121907901	-	RCV000003659|RCV000484493|RCV001250546|RCV001851622|RCV002243617|RCV002496247|RCV003147274	MONDO:MONDO:0008682,MedGen:C0950121,OMIM:194080,Orphanet:220|MedGen:C3661900|MONDO:MONDO:0007635,MeSH:D052159,MedGen:C0950122,OMIM:136680,Orphanet:347;MONDO:MONDO:0008682,MedGen:C0950121,OMIM:194080,Orphanet:220;MONDO:MONDO:0008679,MedGen:CN033288,OMIM:194070,Orphanet:654;MONDO:MONDO:0009733,MedGen:C3151568,OMIM:256370,Orphanet:656|MONDO:MONDO:0007635,MeSH:D052159,MedGen:C0950122,OMIM:136680,Orph…	Drash syndrome|not provided|Frasier syndrome;Drash syndrome;Wilms tumor 1;Nephrotic syndrome, type 4|Frasier syndrome;Drash syndrome;Wilms tumor 1;11p partial monosomy syndrome|Nephrotic syndrome, type 4|8 conditions|Wilms tumor 1	germline;unknown	germline	GRCh37	NC_000011.9	11	32414250	32414250	na	na	11p13	criteria provided, multiple submitters, no conflicts	9	ACMG2013,ACMG2016,ACMG2021,ACMG2022	N	ClinGen:CA016285,OMIM:607102.0004	3	3488	32414250	C	T	WT1:NM_001367854:exon4:c.G128A:p.R43H,WT1:NM_000378:exon7:c.G1265A:p.R422H,WT1:NM_001198552:exon7:c.G614A:p.R205H,WT1:NM_001198551:exon8:c.G665A:p.R222H,WT1:NM_024424:exon8:c.G1316A:p.R439H,WT1:NM_024426:exon8:c.G1316A:p.R439H	0.0	pathogenic	0.034	pathogenic	1.0	pathogenic	0.999	pathogenic	1.26	pathogenic	0.9	pathogenic	1.28	benign
WT1	18528	single nucleotide variant	NM_024426.6(WT1):c.1406A>G (p.Asp469Gly)	7490	WT1	HGNC:12796	Likely pathogenic	1	Jul 14, 2021	121907902	-	RCV000003660|RCV001376854	MONDO:MONDO:0008682,MedGen:C0950121,OMIM:194080,Orphanet:220|MONDO:MONDO:0007635,MeSH:D052159,MedGen:C0950122,OMIM:136680,Orphanet:347;MONDO:MONDO:0008682,MedGen:C0950121,OMIM:194080,Orphanet:220;MONDO:MONDO:0008679,MedGen:CN033288,OMIM:194070,Orphanet:654;MONDO:MONDO:0008681,MedGen:C0206115,OMIM:194072,Orphanet:893	Drash syndrome|Frasier syndrome;Drash syndrome;Wilms tumor 1;11p partial monosomy syndrome	germline	germline	GRCh37	NC_000011.9	11	32413559	32413559	na	na	11p13	criteria provided, single submitter	2	ACMG2013,ACMG2016,ACMG2021,ACMG2022	N	ClinGen:CA016344,OMIM:607102.0005	3	3489	32413559	T	C	WT1:NM_001367854:exon5:c.A218G:p.D73G,WT1:NM_000378:exon8:c.A1355G:p.D452G,WT1:NM_001198552:exon8:c.A704G:p.D235G,WT1:NM_001198551:exon9:c.A755G:p.D252G,WT1:NM_024424:exon9:c.A1406G:p.D469G,WT1:NM_024426:exon9:c.A1406G:p.D469G	0.0	pathogenic	0.122	benign	0.158	benign	0.3	benign	0.91	pathogenic	0.97	pathogenic	3.18	benign
WT1	18529	single nucleotide variant	NM_024426.6(WT1):c.1405G>A (p.Asp469Asn)	7490	WT1	HGNC:12796	Pathogenic	1	Aug 15, 2023	28941778	-	RCV000003661|RCV000003662|RCV003322746	MONDO:MONDO:0008682,MedGen:C0950121,OMIM:194080,Orphanet:220|MONDO:MONDO:0009733,MedGen:C3151568,OMIM:256370,Orphanet:656|MedGen:CN517202	Drash syndrome|Nephrotic syndrome, type 4|not provided	germline	germline	GRCh37	NC_000011.9	11	32413560	32413560	na	na	11p13	criteria provided, multiple submitters, no conflicts	3	ACMG2013,ACMG2016,ACMG2021,ACMG2022	N	ClinGen:CA016338,OMIM:607102.0006	3	3490	32413560	C	T	WT1:NM_001367854:exon5:c.G217A:p.D73N,WT1:NM_000378:exon8:c.G1354A:p.D452N,WT1:NM_001198552:exon8:c.G703A:p.D235N,WT1:NM_001198551:exon9:c.G754A:p.D252N,WT1:NM_024424:exon9:c.G1405A:p.D469N,WT1:NM_024426:exon9:c.G1405A:p.D469N	0.0	pathogenic	0.01	pathogenic	0.999	pathogenic	0.977	pathogenic	1.065	pathogenic	0.93	pathogenic	3.18	benign
WT1	18530	single nucleotide variant	NM_024426.6(WT1):c.1400G>C (p.Arg467Pro)	7490	WT1	HGNC:12796	Pathogenic	1	Oct 06, 2022	121907903	-	RCV000003663|RCV003398433	MONDO:MONDO:0008682,MedGen:C0950121,OMIM:194080,Orphanet:220|	Drash syndrome|WT1-related condition	germline	germline	GRCh37	NC_000011.9	11	32413565	32413565	na	na	11p13	criteria provided, single submitter	2	ACMG2013,ACMG2016,ACMG2021,ACMG2022	N	ClinGen:CA016330,OMIM:607102.0007	3	3491	32413565	C	G	WT1:NM_001367854:exon5:c.G212C:p.R71P,WT1:NM_000378:exon8:c.G1349C:p.R450P,WT1:NM_001198552:exon8:c.G698C:p.R233P,WT1:NM_001198551:exon9:c.G749C:p.R250P,WT1:NM_024424:exon9:c.G1400C:p.R467P,WT1:NM_024426:exon9:c.G1400C:p.R467P	0.0	pathogenic	0.001	pathogenic	1.0	pathogenic	1.0	pathogenic	2.635	pathogenic	1.0	pathogenic	3.19	benign
WT1	18534	single nucleotide variant	NM_024426.6(WT1):c.1348C>T (p.His450Tyr)	7490	WT1	HGNC:12796	Pathogenic/Likely pathogenic	1	Oct 09, 2022	28942089	-	RCV000003667|RCV000003668|RCV002512715	MONDO:MONDO:0008682,MedGen:C0950121,OMIM:194080,Orphanet:220|MONDO:MONDO:0009733,MedGen:C3151568,OMIM:256370,Orphanet:656|MONDO:MONDO:0007635,MeSH:D052159,MedGen:C0950122,OMIM:136680,Orphanet:347;MONDO:MONDO:0008682,MedGen:C0950121,OMIM:194080,Orphanet:220;MONDO:MONDO:0008679,MedGen:CN033288,OMIM:194070,Orphanet:654;MONDO:MONDO:0008681,MedGen:C0206115,OMIM:194072,Orphanet:893	Drash syndrome|Nephrotic syndrome, type 4|Frasier syndrome;Drash syndrome;Wilms tumor 1;11p partial monosomy syndrome	germline	germline	GRCh37	NC_000011.9	11	32414218	32414218	na	na	11p13	criteria provided, multiple submitters, no conflicts	3	ACMG2013,ACMG2016,ACMG2021,ACMG2022	N	ClinGen:CA016298,OMIM:607102.0012	3	3495	32414218	G	A	WT1:NM_001367854:exon4:c.C160T:p.H54Y,WT1:NM_000378:exon7:c.C1297T:p.H433Y,WT1:NM_001198552:exon7:c.C646T:p.H216Y,WT1:NM_001198551:exon8:c.C697T:p.H233Y,WT1:NM_024424:exon8:c.C1348T:p.H450Y,WT1:NM_024426:exon8:c.C1348T:p.H450Y	0.0	pathogenic	0.0	pathogenic	1.0	pathogenic	0.999	pathogenic	3.665	pathogenic	0.95	pathogenic	-0.27	benign
WT1	18535	single nucleotide variant	NM_024426.6(WT1):c.1297T>G (p.Cys433Gly)	7490	WT1	HGNC:12796	Likely pathogenic	1	Apr 11, 2022	121907905	-	RCV000003669|RCV002512716	MONDO:MONDO:0008682,MedGen:C0950121,OMIM:194080,Orphanet:220|MONDO:MONDO:0007635,MeSH:D052159,MedGen:C0950122,OMIM:136680,Orphanet:347;MONDO:MONDO:0008682,MedGen:C0950121,OMIM:194080,Orphanet:220;MONDO:MONDO:0008679,MedGen:CN033288,OMIM:194070,Orphanet:654;MONDO:MONDO:0008681,MedGen:C0206115,OMIM:194072,Orphanet:893	Drash syndrome|Frasier syndrome;Drash syndrome;Wilms tumor 1;11p partial monosomy syndrome	germline	germline	GRCh37	NC_000011.9	11	32414269	32414269	na	na	11p13	criteria provided, single submitter	2	ACMG2013,ACMG2016,ACMG2021,ACMG2022	N	ClinGen:CA016265,OMIM:607102.0013	3	3496	32414269	A	C	WT1:NM_001367854:exon4:c.T109G:p.C37G,WT1:NM_000378:exon7:c.T1246G:p.C416G,WT1:NM_001198552:exon7:c.T595G:p.C199G,WT1:NM_001198551:exon8:c.T646G:p.C216G,WT1:NM_024424:exon8:c.T1297G:p.C433G,WT1:NM_024426:exon8:c.T1297G:p.C433G	0.001	pathogenic	0.0	pathogenic	0.996	pathogenic	0.988	pathogenic	4.09	pathogenic	0.99	pathogenic	-2.04	pathogenic
WT1	18544	single nucleotide variant	NM_024426.6(WT1):c.1315C>T (p.Arg439Cys)	7490	WT1	HGNC:12796	Pathogenic	1	Jun 18, 2020	121907910	-	RCV000003680|RCV001288153	MONDO:MONDO:0012164,MedGen:C1837026,OMIM:608978,Orphanet:3097|MedGen:CN517202	Meacham syndrome|not provided	germline;unknown	germline	GRCh37	NC_000011.9	11	32414251	32414251	na	na	11p13	criteria provided, multiple submitters, no conflicts	3	ACMG2013,ACMG2016,ACMG2021,ACMG2022	N	ClinGen:CA016279,OMIM:607102.0026	3	3505	32414251	G	A	WT1:NM_001367854:exon4:c.C127T:p.R43C,WT1:NM_000378:exon7:c.C1264T:p.R422C,WT1:NM_001198552:exon7:c.C613T:p.R205C,WT1:NM_001198551:exon8:c.C664T:p.R222C,WT1:NM_024424:exon8:c.C1315T:p.R439C,WT1:NM_024426:exon8:c.C1315T:p.R439C	0.0	pathogenic	0.0	pathogenic	1.0	pathogenic	1.0	pathogenic	1.86	pathogenic	0.96	pathogenic	1.26	benign
MTHFR	18558	single nucleotide variant	NM_005957.5(MTHFR):c.470G>A (p.Arg157Gln)	4524	MTHFR	HGNC:7436	Pathogenic/Likely pathogenic	1	Oct 24, 2022	121434295	-	RCV001382824|RCV002476918	MONDO:MONDO:0009353,MedGen:C1856058,OMIM:236250,Orphanet:395|Human Phenotype Ontology:HP:0100753,MONDO:MONDO:0005090,MedGen:C0036341,OMIM:181500;MONDO:MONDO:0009353,MedGen:C1856058,OMIM:236250,Orphanet:395;MONDO:MONDO:0008559,MedGen:C3160733,OMIM:188050;MONDO:MONDO:0011120,MedGen:C1866558,OMIM:601634,Orphanet:823	Homocystinuria due to methylene tetrahydrofolate reductase deficiency|Schizophrenia;Homocystinuria due to methylene tetrahydrofolate reductase deficiency;Thrombophilia due to thrombin defect;Neural tube defects, folate-sensitive	germline;unknown	germline	GRCh37	NC_000001.10	1	11861223	11861223	na	na	1p36.22	criteria provided, multiple submitters, no conflicts	4	-	N	ClinGen:CA278053,UniProtKB:P42898#VAR_004320,OMIM:607093.0002	3	3519	11861223	C	T	MTHFR:NM_001330358:exon3:c.G593A:p.R198Q,MTHFR:NM_005957:exon3:c.G470A:p.R157Q	0.0	pathogenic	0.003	pathogenic	1.0	pathogenic	0.996	pathogenic	4.7	pathogenic	0.92	pathogenic	-3.44	pathogenic
MTHFR	18561	single nucleotide variant	NM_005957.5(MTHFR):c.971A>G (p.Asn324Ser)	4524	MTHFR	HGNC:7436	Likely pathogenic	1	Apr 22, 2022	267606887	-	RCV002225067	MONDO:MONDO:0009353,MedGen:C1856058,OMIM:236250,Orphanet:395	Homocystinuria due to methylene tetrahydrofolate reductase deficiency	germline	germline	GRCh37	NC_000001.10	1	11855215	11855215	na	na	1p36.22	criteria provided, single submitter	2	-	N	OMIM:607093.0005,ClinGen:CA278055,UniProtKB:P42898#VAR_009532	3	3522	11855215	T	C	MTHFR:NM_001330358:exon6:c.A1094G:p.N365S,MTHFR:NM_005957:exon6:c.A971G:p.N324S	0.0	pathogenic	0.0	pathogenic	0.983	pathogenic	0.968	pathogenic	3.535	pathogenic	1.0	pathogenic	-3.35	pathogenic
MTHFR	18562	single nucleotide variant	NM_005957.5(MTHFR):c.1015T>G (p.Trp339Gly)	4524	MTHFR	HGNC:7436	Pathogenic	1	Oct 14, 2021	267606886	-	RCV001851626	MONDO:MONDO:0009353,MedGen:C1856058,OMIM:236250,Orphanet:395	Homocystinuria due to methylene tetrahydrofolate reductase deficiency	germline	germline	GRCh37	NC_000001.10	1	11855171	11855171	na	na	1p36.22	criteria provided, single submitter	2	-	N	ClinGen:CA278057,UniProtKB:P42898#VAR_009533,OMIM:607093.0006	3	3523	11855171	A	C	MTHFR:NM_001330358:exon6:c.T1138G:p.W380G,MTHFR:NM_005957:exon6:c.T1015G:p.W339G	0.027	pathogenic	0.047	pathogenic	0.006	benign	0.017	benign	2.875	pathogenic	1.0	pathogenic	-2.95	pathogenic
MTHFR	18568	single nucleotide variant	NM_005957.5(MTHFR):c.968T>C (p.Leu323Pro)	4524	MTHFR	HGNC:7436	Likely pathogenic	1	Feb 08, 2022	121434297	-	RCV002512718	MONDO:MONDO:0009353,MedGen:C1856058,OMIM:236250,Orphanet:395	Homocystinuria due to methylene tetrahydrofolate reductase deficiency	germline	germline	GRCh37	NC_000001.10	1	11855218	11855218	na	na	1p36.22	criteria provided, single submitter	2	-	N	OMIM:607093.0012,ClinGen:CA278061,UniProtKB:P42898#VAR_009531	3	3529	11855218	A	G	MTHFR:NM_001330358:exon6:c.T1091C:p.L364P,MTHFR:NM_005957:exon6:c.T968C:p.L323P	0.0	pathogenic	0.001	pathogenic	1.0	pathogenic	0.999	pathogenic	4.655	pathogenic	1.0	pathogenic	-3.64	pathogenic
GALT	18648	single nucleotide variant	NM_000155.4(GALT):c.425T>A (p.Met142Lys)	2592	GALT	HGNC:4135	Pathogenic	1	Oct 20, 2022	111033695	-	RCV000003793|RCV000185916|RCV001826409|RCV003398436	MONDO:MONDO:0009258,MedGen:C0268151,OMIM:230400,Orphanet:352,Orphanet:79239|MedGen:C3661900|Human Phenotype Ontology:HP:0004919,MONDO:MONDO:0018116,MedGen:C0016952,OMIM:PS230400,Orphanet:352|	Deficiency of UDPglucose-hexose-1-phosphate uridylyltransferase|not provided|Galactose intolerance|GALT-related condition	germline;unknown	germline	GRCh37	NC_000009.11	9	34647876	34647876	na	na	9p13.3	criteria provided, multiple submitters, no conflicts	10	-	N	ClinGen:CA252843,UniProtKB:P07902#VAR_002574,OMIM:606999.0001	3	3609	34647876	T	A	GALT:NM_001258332:exon3:c.T98A:p.M33K,GALT:NM_000155:exon5:c.T425A:p.M142K	0.0	pathogenic	0.0	pathogenic	0.998	pathogenic	0.979	pathogenic	3.63	pathogenic	0.99	pathogenic	-6.04	pathogenic
GALT	18649	single nucleotide variant	NM_000155.4(GALT):c.997C>T (p.Arg333Trp)	2592	GALT	HGNC:4135	Pathogenic/Likely pathogenic	1	Oct 07, 2022	111033800	-	RCV000003794|RCV000723400|RCV001826410	MONDO:MONDO:0009258,MedGen:C0268151,OMIM:230400,Orphanet:352,Orphanet:79239|MedGen:C3661900|Human Phenotype Ontology:HP:0004919,MONDO:MONDO:0018116,MedGen:C0016952,OMIM:PS230400,Orphanet:352	Deficiency of UDPglucose-hexose-1-phosphate uridylyltransferase|not provided|Galactose intolerance	germline;unknown	germline	GRCh37	NC_000009.11	9	34649499	34649499	na	na	9p13.3	criteria provided, multiple submitters, no conflicts	12	-	N	UniProtKB:P07902#VAR_002627,OMIM:606999.0002,ClinGen:CA252844	3	3610	34649499	C	T	GALT:NM_001258332:exon8:c.C670T:p.R224W,GALT:NM_000155:exon10:c.C997T:p.R333W	0.0	pathogenic	0.0	pathogenic	1.0	pathogenic	0.999	pathogenic	3.82	pathogenic	0.93	pathogenic	-5.87	pathogenic
GALT	18654	single nucleotide variant	NM_000155.4(GALT):c.221T>C (p.Leu74Pro)	2592	GALT	HGNC:4135	Pathogenic/Likely pathogenic	1	Jun 24, 2022	111033663	-	RCV000003799|RCV000723459|RCV001826411	MONDO:MONDO:0009258,MedGen:C0268151,OMIM:230400,Orphanet:352,Orphanet:79239|MedGen:C3661900|Human Phenotype Ontology:HP:0004919,MONDO:MONDO:0018116,MedGen:C0016952,OMIM:PS230400,Orphanet:352	Deficiency of UDPglucose-hexose-1-phosphate uridylyltransferase|not provided|Galactose intolerance	germline;unknown	germline	GRCh37	NC_000009.11	9	34647224	34647224	na	na	9p13.3	criteria provided, multiple submitters, no conflicts	5	-	N	ClinGen:CA252846,UniProtKB:P07902#VAR_002557,OMIM:606999.0007	3	3615	34647224	T	C	GALT:NM_000155:exon2:c.T221C:p.L74P,GALT:NM_001258332:exon2:c.T19C:p.C7R	0.02	pathogenic	0.082	benign	-	-	-	-	-	-	0.79	pathogenic	-7.06	pathogenic
GALT	18655	single nucleotide variant	NM_000155.4(GALT):c.512T>C (p.Phe171Ser)	2592	GALT	HGNC:4135	Pathogenic/Likely pathogenic	1	Oct 04, 2022	111033715	-	RCV000003800|RCV000723392|RCV001831509	MONDO:MONDO:0009258,MedGen:C0268151,OMIM:230400,Orphanet:352,Orphanet:79239|MedGen:C3661900|Human Phenotype Ontology:HP:0004919,MONDO:MONDO:0018116,MedGen:C0016952,OMIM:PS230400,Orphanet:352	Deficiency of UDPglucose-hexose-1-phosphate uridylyltransferase|not provided|Galactose intolerance	germline;unknown	germline	GRCh37	NC_000009.11	9	34648116	34648116	na	na	9p13.3	criteria provided, multiple submitters, no conflicts	8	-	Y	UniProtKB:P07902#VAR_002583,OMIM:606999.0008,ClinGen:CA340106	3	3616	34648116	T	C	GALT:NM_001258332:exon4:c.T185C:p.F62S,GALT:NM_000155:exon6:c.T512C:p.F171S	0.0	pathogenic	0.0	pathogenic	1.0	pathogenic	1.0	pathogenic	-	-	1.0	pathogenic	-6.57	pathogenic
GALT	18656	single nucleotide variant	NM_000155.4(GALT):c.957C>A (p.His319Gln)	2592	GALT	HGNC:4135	Pathogenic/Likely pathogenic	1	Jun 12, 2022	111033792	-	RCV000003801|RCV000727567	MONDO:MONDO:0009258,MedGen:C0268151,OMIM:230400,Orphanet:352,Orphanet:79239|MedGen:C3661900	Deficiency of UDPglucose-hexose-1-phosphate uridylyltransferase|not provided	germline;unknown	germline	GRCh37	NC_000009.11	9	34649459	34649459	na	na	9p13.3	criteria provided, multiple submitters, no conflicts	6	-	N	ClinGen:CA252847,UniProtKB:P07902#VAR_002616,OMIM:606999.0009	3	3617	34649459	C	A	GALT:NM_001258332:exon8:c.C630A:p.H210Q,GALT:NM_000155:exon10:c.C957A:p.H319Q	0.0	pathogenic	0.001	pathogenic	1.0	pathogenic	0.999	pathogenic	4.015	pathogenic	0.93	pathogenic	-7.39	pathogenic
GALT	18657	single nucleotide variant	NM_000155.4(GALT):c.404C>T (p.Ser135Leu)	2592	GALT	HGNC:4135	Pathogenic/Likely pathogenic	1	Nov 01, 2022	111033690	-	RCV000003802|RCV000185915|RCV001826412|RCV002251865|RCV002512724	MONDO:MONDO:0009258,MedGen:C0268151,OMIM:230400,Orphanet:352,Orphanet:79239|MedGen:C3661900|Human Phenotype Ontology:HP:0004919,MONDO:MONDO:0018116,MedGen:C0016952,OMIM:PS230400,Orphanet:352||MeSH:D030342,MedGen:C0950123	Deficiency of UDPglucose-hexose-1-phosphate uridylyltransferase|not provided|Galactose intolerance|See cases|Inborn genetic diseases	germline;unknown	germline	GRCh37	NC_000009.11	9	34647855	34647855	na	na	9p13.3	criteria provided, multiple submitters, no conflicts	23	-	Y	ClinGen:CA312565,UniProtKB:P07902#VAR_002571,OMIM:606999.0010	3	3618	34647855	C	T	GALT:NM_001258332:exon3:c.C77T:p.S26L,GALT:NM_000155:exon5:c.C404T:p.S135L	0.003	pathogenic	0.012	pathogenic	0.94	pathogenic	0.46	benign	2.65	pathogenic	1.0	pathogenic	-5.77	pathogenic
GALT	18660	single nucleotide variant	NM_000155.4(GALT):c.855G>T (p.Lys285Asn)	2592	GALT	HGNC:4135	Pathogenic	1	Aug 14, 2023	111033773	-	RCV000003805|RCV000224446|RCV001831510	MONDO:MONDO:0009258,MedGen:C0268151,OMIM:230400,Orphanet:352,Orphanet:79239|MedGen:C3661900|Human Phenotype Ontology:HP:0004919,MONDO:MONDO:0018116,MedGen:C0016952,OMIM:PS230400,Orphanet:352	Deficiency of UDPglucose-hexose-1-phosphate uridylyltransferase|not provided|Galactose intolerance	germline;unknown	germline	GRCh37	NC_000009.11	9	34649029	34649029	na	na	9p13.3	criteria provided, multiple submitters, no conflicts	21	-	Y	ClinGen:CA340107,UniProtKB:P07902#VAR_002609,OMIM:606999.0013	3	3621	34649029	G	T	GALT:NM_001258332:exon7:c.G528T:p.K176N,GALT:NM_000155:exon9:c.G855T:p.K285N	0.001	pathogenic	0.004	pathogenic	0.996	pathogenic	0.972	pathogenic	3.755	pathogenic	0.96	pathogenic	-5.86	pathogenic
GALT	18662	single nucleotide variant	NM_000155.4(GALT):c.997C>G (p.Arg333Gly)	2592	GALT	HGNC:4135	Pathogenic	1	Aug 16, 2022	111033800	-	RCV000003807|RCV001831511	MONDO:MONDO:0009258,MedGen:C0268151,OMIM:230400,Orphanet:352,Orphanet:79239|Human Phenotype Ontology:HP:0004919,MONDO:MONDO:0018116,MedGen:C0016952,OMIM:PS230400,Orphanet:352	Deficiency of UDPglucose-hexose-1-phosphate uridylyltransferase|Galactose intolerance	germline;unknown	germline	GRCh37	NC_000009.11	9	34649499	34649499	na	na	9p13.3	criteria provided, multiple submitters, no conflicts	5	-	N	OMIM:606999.0015,ClinGen:CA340109,UniProtKB:P07902#VAR_002625	3	3623	34649499	C	G	GALT:NM_001258332:exon8:c.C670G:p.R224G,GALT:NM_000155:exon10:c.C997G:p.R333G	0.0	pathogenic	0.013	pathogenic	0.958	pathogenic	0.735	pathogenic	3.47	pathogenic	0.96	pathogenic	-5.52	pathogenic
EIF2B2	19375	single nucleotide variant	NM_014239.4(EIF2B2):c.638A>G (p.Glu213Gly)	8892	EIF2B2	HGNC:3258	Pathogenic	1	Aug 13, 2022	104894425	-	RCV000004583|RCV001847578|RCV002251875|RCV003221399	MONDO:MONDO:0800448,MedGen:C1858991,OMIM:PS603896,Orphanet:135,Orphanet:99853|MedGen:C3661900||MedGen:C5830404,OMIM:620312	Vanishing white matter disease|not provided|See cases|Leukoencephalopathy with vanishing white matter 2	germline;maternal	germline	GRCh37	NC_000014.8	14	75472609	75472609	na	na	14q24.3	criteria provided, multiple submitters, no conflicts	12	-	N	ClinGen:CA116769,UniProtKB:P49770#VAR_012289,OMIM:606454.0001	3	4336	75472609	A	G	EIF2B2:NM_014239:exon5:c.A638G:p.E213G	0.001	pathogenic	0.028	pathogenic	0.952	pathogenic	0.826	pathogenic	2.755	pathogenic	0.96	pathogenic	-3.9	pathogenic
EIF2B2	19376	single nucleotide variant	NM_014239.4(EIF2B2):c.947T>A (p.Val316Asp)	8892	EIF2B2	HGNC:3258	Likely pathogenic	1	Feb 27, 2023	104894426	-	RCV000004585|RCV000995207|RCV003221400	MONDO:MONDO:0800448,MedGen:C1858991,OMIM:PS603896,Orphanet:135,Orphanet:99853|MedGen:C3661900|MedGen:C5830404,OMIM:620312	Vanishing white matter disease|not provided|Leukoencephalopathy with vanishing white matter 2	germline	germline	GRCh37	NC_000014.8	14	75475782	75475782	na	na	14q24.3	criteria provided, multiple submitters, no conflicts	3	-	N	ClinGen:CA340227,UniProtKB:P49770#VAR_012290,OMIM:606454.0002	3	4337	75475782	T	A	EIF2B2:NM_014239:exon8:c.T947A:p.V316D	0.0	pathogenic	0.0	pathogenic	1.0	pathogenic	0.995	pathogenic	3.315	pathogenic	0.96	pathogenic	-4.14	pathogenic
EIF2B3	19476	single nucleotide variant	NM_020365.5(EIF2B3):c.674G>A (p.Arg225Gln)	8891	EIF2B3	HGNC:3259	Likely pathogenic	1	Dec 24, 2021	113994024	-	RCV003221404|RCV002512762	MedGen:C5830405,OMIM:620313|MedGen:C3661900	Leukoencephalopathy with vanishing white matter 3|not provided	germline	germline	GRCh37	NC_000001.10	1	45347394	45347394	na	na	1p34.1	criteria provided, single submitter	2	-	N	ClinGen:CA340256,UniProtKB:Q9NR50#VAR_015410,OMIM:606273.0001	3	4437	45347394	C	T	EIF2B3:NM_001166588:exon7:c.G674A:p.R225Q,EIF2B3:NM_001261418:exon7:c.G674A:p.R225Q,EIF2B3:NM_020365:exon7:c.G674A:p.R225Q	0.01	pathogenic	0.013	pathogenic	1.0	pathogenic	0.949	pathogenic	2.455	pathogenic	0.8	pathogenic	-1.99	pathogenic
WFS1	19551	single nucleotide variant	NM_006005.3(WFS1):c.1511C>T (p.Pro504Leu)	7466	WFS1	HGNC:12762	Pathogenic/Likely pathogenic	1	Oct 09, 2023	28937892	-	RCV000004770|RCV001387727|RCV002243622|RCV002496259	MONDO:MONDO:0009101,MedGen:C4551693,OMIM:222300,Orphanet:3463|MedGen:C3661900|MONDO:MONDO:0013673,MedGen:C3280358,OMIM:614296,Orphanet:411590;MONDO:MONDO:0009101,MedGen:C4551693,OMIM:222300,Orphanet:3463|MONDO:MONDO:0013673,MedGen:C3280358,OMIM:614296,Orphanet:411590;Human Phenotype Ontology:HP:0005965,Human Phenotype Ontology:HP:0005978,Human Phenotype Ontology:HP:0100652,MONDO:MONDO:0005148,MeS…	Wolfram syndrome 1|not provided|Wolfram-like syndrome;Wolfram syndrome 1|Wolfram-like syndrome;Type II diabetes mellitus;Autosomal dominant nonsyndromic hearing loss 6;Wolfram syndrome 1;Cataract 41	germline;unknown	germline	GRCh37	NC_000004.11	4	6303033	6303033	na	na	4p16.1	criteria provided, multiple submitters, no conflicts	6	-	N	ClinGen:CA253190,UniProtKB:O76024#VAR_005842,OMIM:606201.0006	3	4512	6303033	C	T	WFS1:NM_001145853:exon8:c.C1511T:p.P504L,WFS1:NM_006005:exon8:c.C1511T:p.P504L	0.052	benign	0.0	pathogenic	0.991	pathogenic	0.811	pathogenic	2.83	pathogenic	1.0	pathogenic	-2.69	pathogenic
WFS1	19559	single nucleotide variant	NM_006005.3(WFS1):c.2146G>A (p.Ala716Thr)	7466	WFS1	HGNC:12762	Pathogenic/Likely pathogenic	1	Jul 12, 2023	28937893	-	RCV000004778|RCV000522349|RCV000599627	MONDO:MONDO:0010963,MedGen:C1833021,OMIM:600965,Orphanet:90635|MedGen:CN517202|MedGen:CN826980,Orphanet:96210	Autosomal dominant nonsyndromic hearing loss 6|not provided|Rare genetic deafness	germline	germline	GRCh37	NC_000004.11	4	6303668	6303668	na	na	4p16.1	criteria provided, multiple submitters, no conflicts	4	-	N	ClinGen:CA253197,UniProtKB:O76024#VAR_032965,OMIM:606201.0014	3	4520	6303668	G	A	WFS1:NM_001145853:exon8:c.G2146A:p.A716T,WFS1:NM_006005:exon8:c.G2146A:p.A716T	0.115	benign	0.108	benign	0.998	pathogenic	0.808	pathogenic	2.52	pathogenic	0.73	pathogenic	-4.15	pathogenic
WFS1	19560	single nucleotide variant	NM_006005.3(WFS1):c.2486T>C (p.Leu829Pro)	7466	WFS1	HGNC:12762	Pathogenic/Likely pathogenic	1	May 01, 2023	104893883	-	RCV000004779|RCV000726781|RCV001267554|RCV003155015	MONDO:MONDO:0010963,MedGen:C1833021,OMIM:600965,Orphanet:90635|MedGen:CN517202|MeSH:D030342,MedGen:C0950123|MONDO:MONDO:0009101,MedGen:C4551693,OMIM:222300,Orphanet:3463	Autosomal dominant nonsyndromic hearing loss 6|not provided|Inborn genetic diseases|Wolfram syndrome 1	germline	germline	GRCh37	NC_000004.11	4	6304008	6304008	na	na	4p16.1	criteria provided, multiple submitters, no conflicts	6	-	N	ClinGen:CA253199,UniProtKB:O76024#VAR_032967,OMIM:606201.0015	3	4521	6304008	T	C	WFS1:NM_001145853:exon8:c.T2486C:p.L829P,WFS1:NM_006005:exon8:c.T2486C:p.L829P	0.001	pathogenic	0.0	pathogenic	1.0	pathogenic	1.0	pathogenic	2.42	pathogenic	0.85	pathogenic	-3.66	pathogenic
WFS1	19565	single nucleotide variant	NM_006005.3(WFS1):c.2590G>A (p.Glu864Lys)	7466	WFS1	HGNC:12762	Pathogenic/Likely pathogenic	1	Jun 27, 2022	74315205	-	RCV000004784|RCV000020637|RCV000523215|RCV000599631|RCV001528145|RCV001544536	MONDO:MONDO:0013673,MedGen:C3280358,OMIM:614296,Orphanet:411590|MONDO:MONDO:0010963,MedGen:C1833021,OMIM:600965,Orphanet:90635|MedGen:C3661900|MedGen:CN826980,Orphanet:96210|MONDO:MONDO:0009101,MedGen:C4551693,OMIM:222300,Orphanet:3463|MONDO:MONDO:0019497,MedGen:CN043648,Orphanet:87884	Wolfram-like syndrome|Autosomal dominant nonsyndromic hearing loss 6|not provided|Rare genetic deafness|Wolfram syndrome 1|Nonsyndromic genetic hearing loss	germline;unknown	germline	GRCh37	NC_000004.11	4	6304112	6304112	na	na	4p16.1	criteria provided, multiple submitters, no conflicts	10	-	N	ClinGen:CA116903,UniProtKB:O76024#VAR_032969,OMIM:606201.0020	3	4526	6304112	G	A	WFS1:NM_001145853:exon8:c.G2590A:p.E864K,WFS1:NM_006005:exon8:c.G2590A:p.E864K	0.045	pathogenic	0.0	pathogenic	1.0	pathogenic	0.998	pathogenic	2.51	pathogenic	0.84	pathogenic	-3.27	pathogenic
TWNK	19657	single nucleotide variant	NM_021830.5(TWNK):c.1075G>A (p.Ala359Thr)	56652	TWNK	HGNC:1160	Pathogenic/Likely pathogenic	1	May 03, 2022	111033573	-	RCV000004881|RCV000508874|RCV002512779	MONDO:MONDO:0012241,MedGen:C1836439,OMIM:609286|MONDO:MONDO:0044970,MedGen:C0751651,Orphanet:68380|MedGen:CN517202	Progressive external ophthalmoplegia with mitochondrial DNA deletions, autosomal dominant 3|Mitochondrial disease|not provided	germline;unknown	germline	GRCh37	NC_000010.10	10	102749042	102749042	na	na	10q24.31	criteria provided, multiple submitters, no conflicts	5	-	N	ClinGen:CA116959,UniProtKB:Q96RR1#VAR_023654,OMIM:606075.0003	3	4618	102749042	G	A	TWNK:NM_001163812:exon1:c.G1075A:p.A359T,TWNK:NM_021830:exon1:c.G1075A:p.A359T	0.003	pathogenic	0.006	pathogenic	0.994	pathogenic	0.67	pathogenic	3.305	pathogenic	0.83	pathogenic	-4.24	pathogenic
TWNK	19662	single nucleotide variant	NM_021830.5(TWNK):c.1001G>A (p.Arg334Gln)	56652	TWNK	HGNC:1160	Pathogenic/Likely pathogenic	1	Sep 12, 2022	28937887	-	RCV000004886|RCV000508769|RCV001093424|RCV001542762|RCV002288465	MedGen:C1868097|MONDO:MONDO:0044970,MedGen:C0751651,Orphanet:68380|MedGen:C3661900|MONDO:MONDO:0010060,MedGen:C1849096,OMIM:271245,Orphanet:1186|MONDO:MONDO:0012241,MedGen:C1836439,OMIM:609286	Progressive external ophthalmoplegia with mitochondrial DNA deletions, digenic|Mitochondrial disease|not provided|Infantile onset spinocerebellar ataxia|Progressive external ophthalmoplegia with mitochondrial DNA deletions, autosomal dominant 3	germline	germline	GRCh37	NC_000010.10	10	102748968	102748968	na	na	10q24.31	criteria provided, multiple submitters, no conflicts	6	-	N	ClinGen:CA116965,UniProtKB:Q96RR1#VAR_023651,OMIM:606075.0008	3	4623	102748968	G	A	TWNK:NM_001163812:exon1:c.G1001A:p.R334Q,TWNK:NM_021830:exon1:c.G1001A:p.R334Q	0.057	benign	0.09	benign	0.999	pathogenic	0.889	pathogenic	2.055	pathogenic	0.28	benign	-3.4	pathogenic
TWNK	19666	single nucleotide variant	NM_021830.5(TWNK):c.1523A>G (p.Tyr508Cys)	56652	TWNK	HGNC:1160	Pathogenic/Likely pathogenic	1	May 22, 2022	80356540	-	RCV000020865|RCV000199894	MONDO:MONDO:0010060,MedGen:C1849096,OMIM:271245,Orphanet:1186|MedGen:C3661900	Infantile onset spinocerebellar ataxia|not provided	germline;paternal	germline	GRCh37	NC_000010.10	10	102750231	102750231	na	na	10q24.31	criteria provided, multiple submitters, no conflicts	7	-	N	ClinGen:CA324445,UniProtKB:Q96RR1#VAR_043797,OMIM:606075.0012	3	4627	102750231	A	G	TWNK:NM_001163812:exon3:c.A1523G:p.Y508C,TWNK:NM_001163813:exon3:c.A161G:p.Y54C,TWNK:NM_001163814:exon3:c.A161G:p.Y54C,TWNK:NM_001368275:exon3:c.A161G:p.Y54C,TWNK:NM_021830:exon3:c.A1523G:p.Y508C	0.005	pathogenic	0.017	pathogenic	1.0	pathogenic	0.982	pathogenic	2.77	pathogenic	0.92	pathogenic	-3.36	pathogenic
TWNK	19668	single nucleotide variant	NM_021830.5(TWNK):c.1120C>T (p.Arg374Trp)	56652	TWNK	HGNC:1160	Likely pathogenic	1	Aug 18, 2023	267606682	-	RCV000004892|RCV000523637	MONDO:MONDO:0012241,MedGen:C1836439,OMIM:609286|MedGen:CN517202	Progressive external ophthalmoplegia with mitochondrial DNA deletions, autosomal dominant 3|not provided	germline	germline	GRCh37	NC_000010.10	10	102749087	102749087	na	na	10q24.31	criteria provided, multiple submitters, no conflicts	3	-	N	ClinGen:CA116970,OMIM:606075.0014	3	4629	102749087	C	T	TWNK:NM_001163812:exon1:c.C1120T:p.R374W,TWNK:NM_021830:exon1:c.C1120T:p.R374W	0.0	pathogenic	0.001	pathogenic	1.0	pathogenic	0.993	pathogenic	3.43	pathogenic	0.83	pathogenic	-3.74	pathogenic
TWNK	19669	single nucleotide variant	NM_021830.5(TWNK):c.952G>A (p.Ala318Thr)	56652	TWNK	HGNC:1160	Pathogenic	1	Aug 14, 2020	80356542	-	RCV000020866|RCV002251876	MONDO:MONDO:0010060,MedGen:C1849096,OMIM:271245,Orphanet:1186|	Infantile onset spinocerebellar ataxia|See cases	germline	germline	GRCh37	NC_000010.10	10	102748919	102748919	na	na	10q24.31	criteria provided, single submitter	3	-	N	ClinGen:CA342356,UniProtKB:Q96RR1#VAR_065104,OMIM:606075.0015	3	4630	102748919	G	A	TWNK:NM_001163812:exon1:c.G952A:p.A318T,TWNK:NM_021830:exon1:c.G952A:p.A318T	0.005	pathogenic	0.01	pathogenic	0.99	pathogenic	0.607	pathogenic	3.08	pathogenic	0.91	pathogenic	-3.07	pathogenic
MRPS22	19792	single nucleotide variant	NM_020191.4(MRPS22):c.509G>A (p.Arg170His)	56945	MRPS22	HGNC:14508	Pathogenic/Likely pathogenic	1	Apr 13, 2023	119478059	-	RCV000005019|RCV000799575|RCV002496263	MONDO:MONDO:0012718,MedGen:C2673642,OMIM:611719,Orphanet:137908|MedGen:CN517202|MONDO:MONDO:0012718,MedGen:C2673642,OMIM:611719,Orphanet:137908;MONDO:MONDO:0020857,MedGen:C4748263,OMIM:618117	Hypotonia with lactic acidemia and hyperammonemia|not provided|Hypotonia with lactic acidemia and hyperammonemia;Ovarian dysgenesis 7	germline;maternal;unknown	germline	GRCh37	NC_000003.11	3	139069025	139069025	na	na	3q23	criteria provided, multiple submitters, no conflicts	5	-	N	ClinGen:CA117061,UniProtKB:P82650#VAR_042733,OMIM:605810.0001	3	4753	139069025	G	A	MRPS22:NM_001363857:exon4:c.G386A:p.R129H,MRPS22:NM_001363893:exon4:c.G506A:p.R169H,MRPS22:NM_020191:exon4:c.G509A:p.R170H	0.0	pathogenic	0.0	pathogenic	1.0	pathogenic	1.0	pathogenic	3.195	pathogenic	0.94	pathogenic	-2.63	pathogenic
HSD17B3	19911	single nucleotide variant	NM_000197.2(HSD17B3):c.695C>T (p.Ser232Leu)	3293	HSD17B3	HGNC:5212	Pathogenic	1	Aug 16, 2022	28939085	-	RCV000005148|RCV002512796	MONDO:MONDO:0009916,MedGen:C0268296,OMIM:264300,Orphanet:752|MedGen:CN517202	Testosterone 17-beta-dehydrogenase deficiency|not provided	germline	germline	GRCh37	NC_000009.11	9	99003167	99003167	na	na	9q22.32	criteria provided, multiple submitters, no conflicts	3	-	N	ClinGen:CA117110,UniProtKB:P37058#VAR_006956,OMIM:605573.0001	3	4872	99003167	G	A	HSD17B3:NM_000197:exon10:c.C695T:p.S232L	0.005	pathogenic	0.004	pathogenic	1.0	pathogenic	0.982	pathogenic	3.34	pathogenic	0.24	benign	-3.08	pathogenic
HSD17B3	19913	single nucleotide variant	NM_000197.2(HSD17B3):c.239G>A (p.Arg80Gln)	3293	HSD17B3	HGNC:5212	Pathogenic	1	Mar 07, 2022	119481075	-	RCV000005150|RCV000255553|RCV000581347	MONDO:MONDO:0009916,MedGen:C0268296,OMIM:264300,Orphanet:752|MedGen:CN517202|MONDO:MONDO:0005518,MedGen:C0033804	Testosterone 17-beta-dehydrogenase deficiency|not provided|Pseudohermaphroditism	germline;unknown	germline	GRCh37	NC_000009.11	9	99017188	99017188	na	na	9q22.32	criteria provided, multiple submitters, no conflicts	6	-	N	ClinGen:CA117112,UniProtKB:P37058#VAR_006953,OMIM:605573.0003,ClinVar:424781	3	4874	99017188	C	T	HSD17B3:NM_000197:exon3:c.G239A:p.R80Q	0.002	pathogenic	0.005	pathogenic	1.0	pathogenic	0.995	pathogenic	3.91	pathogenic	0.87	pathogenic	-2.96	pathogenic
HSD17B3	19914	single nucleotide variant	NM_000197.2(HSD17B3):c.608C>T (p.Ala203Val)	3293	HSD17B3	HGNC:5212	Pathogenic	1	May 30, 2023	119481076	-	RCV000005151|RCV000584321|RCV000623499|RCV001804713	MONDO:MONDO:0009916,MedGen:C0268296,OMIM:264300,Orphanet:752|MONDO:MONDO:0005518,MedGen:C0033804|MeSH:D030342,MedGen:C0950123|MedGen:CN517202	Testosterone 17-beta-dehydrogenase deficiency|Pseudohermaphroditism|Inborn genetic diseases|not provided	germline	germline	GRCh37	NC_000009.11	9	99006675	99006675	na	na	9q22.32	criteria provided, multiple submitters, no conflicts	5	-	N	ClinGen:CA117113,UniProtKB:P37058#VAR_006955,OMIM:605573.0004	3	4875	99006675	G	A	HSD17B3:NM_000197:exon9:c.C608T:p.A203V	0.196	benign	0.257	benign	0.711	pathogenic	0.351	benign	3.15	pathogenic	0.21	benign	-2.71	pathogenic
HSD17B3	19916	single nucleotide variant	NM_000197.2(HSD17B3):c.238C>T (p.Arg80Trp)	3293	HSD17B3	HGNC:5212	Pathogenic/Likely pathogenic	1	Sep 01, 2022	119481077	-	RCV000005153|RCV000514552|RCV000584139	MONDO:MONDO:0009916,MedGen:C0268296,OMIM:264300,Orphanet:752|MedGen:CN517202|MONDO:MONDO:0005518,MedGen:C0033804	Testosterone 17-beta-dehydrogenase deficiency|not provided|Pseudohermaphroditism	germline	germline	GRCh37	NC_000009.11	9	99017189	99017189	na	na	9q22.32	criteria provided, multiple submitters, no conflicts	6	-	N	ClinGen:CA117114,UniProtKB:P37058#VAR_006954,OMIM:605573.0007	3	4877	99017189	G	A	HSD17B3:NM_000197:exon3:c.C238T:p.R80W	0.0	pathogenic	0.0	pathogenic	1.0	pathogenic	1.0	pathogenic	4.715	pathogenic	0.89	pathogenic	-3.0	pathogenic
HSD17B3	19919	single nucleotide variant	NM_000197.2(HSD17B3):c.389A>G (p.Asn130Ser)	3293	HSD17B3	HGNC:5212	Likely pathogenic	1	Sep 28, 2020	119481079	-	RCV000005156|RCV001818138	MONDO:MONDO:0009916,MedGen:C0268296,OMIM:264300,Orphanet:752|MedGen:CN517202	Testosterone 17-beta-dehydrogenase deficiency|not provided	germline	germline	GRCh37	NC_000009.11	9	99013764	99013764	na	na	9q22.32	criteria provided, single submitter	2	-	N	ClinGen:CA117116,UniProtKB:P37058#VAR_016069,OMIM:605573.0009	3	4880	99013764	T	C	HSD17B3:NM_000197:exon5:c.A389G:p.N130S	0.0	pathogenic	0.0	pathogenic	1.0	pathogenic	1.0	pathogenic	3.875	pathogenic	0.89	pathogenic	-2.56	pathogenic
OPA1	20123	single nucleotide variant	NM_130837.3(OPA1):c.1034G>A (p.Arg345Gln)	4976	OPA1	HGNC:8140	Pathogenic/Likely pathogenic	1	Aug 25, 2022	121908375	-	RCV000005389|RCV000790668|RCV001336297	MONDO:MONDO:0008134,MedGen:C0338508,OMIM:165500,Orphanet:98673|MedGen:C3661900|MONDO:MONDO:0007429,MedGen:C3276549,OMIM:125250	Autosomal dominant optic atrophy classic form|not provided|Optic atrophy with or without deafness, ophthalmoplegia, myopathy, ataxia, and neuropathy	germline;maternal;unknown	germline	GRCh37	NC_000003.11	3	193355069	193355069	na	na	3q29	criteria provided, multiple submitters, no conflicts	9	-	N	ClinGen:CA223219,UniProtKB:O60313#VAR_011483,OMIM:605290.0005	3	5084	193355069	G	A	OPA1:NM_130831:exon7:c.G761A:p.R254Q,OPA1:NM_015560:exon8:c.G869A:p.R290Q,OPA1:NM_130832:exon8:c.G815A:p.R272Q,OPA1:NM_130833:exon8:c.G872A:p.R291Q,OPA1:NM_001354663:exon9:c.G500A:p.R167Q,OPA1:NM_001354664:exon9:c.G497A:p.R166Q,OPA1:NM_130834:exon9:c.G923A:p.R308Q,OPA1:NM_130835:exon9:c.G926A:p.R309Q,OPA1:NM_130836:exon9:c.G980A:p.R327Q,OPA1:NM_130837:exon10:c.G1034A:p.R345Q	0.037	pathogenic	0.0	pathogenic	1.0	pathogenic	0.992	pathogenic	0.355	benign	0.79	pathogenic	-3.74	pathogenic
OPA1	20130	single nucleotide variant	NM_130837.3(OPA1):c.1499G>A (p.Arg500His)	4976	OPA1	HGNC:8140	Pathogenic	1	Mar 01, 2023	80356529	-	RCV000005396|RCV000081749|RCV000508953|RCV003137493	MONDO:MONDO:0007429,MedGen:C3276549,OMIM:125250|MedGen:C3661900|MONDO:MONDO:0044970,MedGen:C0751651,Orphanet:68380|MONDO:MONDO:0008134,MedGen:C0338508,OMIM:165500,Orphanet:98673	Optic atrophy with or without deafness, ophthalmoplegia, myopathy, ataxia, and neuropathy|not provided|Mitochondrial disease|Autosomal dominant optic atrophy classic form	germline;unknown	germline	GRCh37	NC_000003.11	3	193361785	193361785	na	na	3q29	criteria provided, multiple submitters, no conflicts	9	-	N	ClinGen:CA275012,UniProtKB:O60313#VAR_015741,OMIM:605290.0011	3	5091	193361785	G	A	OPA1:NM_130831:exon13:c.G1226A:p.R409H,OPA1:NM_015560:exon14:c.G1334A:p.R445H,OPA1:NM_130832:exon14:c.G1280A:p.R427H,OPA1:NM_130833:exon14:c.G1337A:p.R446H,OPA1:NM_001354663:exon15:c.G965A:p.R322H,OPA1:NM_001354664:exon15:c.G962A:p.R321H,OPA1:NM_130834:exon15:c.G1388A:p.R463H,OPA1:NM_130835:exon15:c.G1391A:p.R464H,OPA1:NM_130836:exon15:c.G1445A:p.R482H,OPA1:NM_130837:exon16:c.G1499A:p.R500H	0.0	pathogenic	0.001	pathogenic	1.0	pathogenic	0.966	pathogenic	2.855	pathogenic	0.99	pathogenic	-4.21	pathogenic
TSC1	20138	single nucleotide variant	NM_000368.5(TSC1):c.1760A>G (p.Lys587Arg)	7248	TSC1	HGNC:12362	Benign	0	Oct 20, 2022	118203576	-	RCV000005405|RCV000042078|RCV000118691|RCV000163265|RCV000224245|RCV000303027	MONDO:MONDO:0008612,MedGen:C1854465,OMIM:191100,Orphanet:805|MONDO:MONDO:0001734,MedGen:C0041341,OMIM:PS191100,Orphanet:805|MedGen:CN169374|MONDO:MONDO:0015356,MeSH:D009386,MedGen:C0027672,Orphanet:140162|MedGen:C3661900|Human Phenotype Ontology:HP:0032051,MONDO:MONDO:0011818,MedGen:C1846385,OMIM:607341,Orphanet:268994	Tuberous sclerosis 1|Tuberous sclerosis syndrome|not specified|Hereditary cancer-predisposing syndrome|not provided|Isolated focal cortical dysplasia type II	germline;unknown	germline	GRCh37	NC_000009.11	9	135781205	135781205	na	na	9q34.13	criteria provided, multiple submitters, no conflicts	23	ACMG2013,ACMG2016,ACMG2021,ACMG2022	N	ClinGen:CA005376,UniProtKB:Q92574#VAR_009406,Tuberous sclerosis database (TSC1):TSC1_00108,OMIM:605284.0003	3	5099	135781205	T	C	TSC1:NM_001162427:exon14:c.A1607G:p.K536R,TSC1:NM_001362177:exon14:c.A1397G:p.K466R,TSC1:NM_000368:exon15:c.A1760G:p.K587R,TSC1:NM_001162426:exon15:c.A1757G:p.K586R	0.045	pathogenic	0.586	benign	0.01	benign	0.023	benign	1.5	pathogenic	0.02	benign	-2.15	pathogenic
TSC1	20143	single nucleotide variant	NM_000368.5(TSC1):c.671T>G (p.Met224Arg)	7248	TSC1	HGNC:12362	Likely pathogenic	1	Sep 01, 2021	118203426	-	RCV000005411|RCV000042336	MONDO:MONDO:0008612,MedGen:C1854465,OMIM:191100,Orphanet:805|MONDO:MONDO:0001734,MedGen:C0041341,OMIM:PS191100,Orphanet:805	Tuberous sclerosis 1|Tuberous sclerosis syndrome	germline	germline	GRCh37	NC_000009.11	9	135796816	135796816	na	na	9q34.13	criteria provided, single submitter	3	ACMG2013,ACMG2016,ACMG2021,ACMG2022	N	ClinGen:CA008014,UniProtKB:Q92574#VAR_009401,Tuberous sclerosis database (TSC1):TSC1_00036,OMIM:605284.0008	3	5104	135796816	A	C	TSC1:NM_001162427:exon7:c.T518G:p.M173R,TSC1:NM_001362177:exon7:c.T308G:p.M103R,TSC1:NM_000368:exon8:c.T671G:p.M224R,TSC1:NM_001162426:exon8:c.T671G:p.M224R	0.001	pathogenic	0.003	pathogenic	0.994	pathogenic	0.933	pathogenic	2.34	pathogenic	0.88	pathogenic	-2.21	pathogenic
TRIM37	20285	single nucleotide variant	NM_015294.6(TRIM37):c.860G>A (p.Ser287Asn)	4591	TRIM37	HGNC:7523	Likely pathogenic	1	Nov 03, 2017	386834008	-	RCV000005558|RCV000729885	MONDO:MONDO:0009664,MedGen:C0524582,OMIM:253250,Orphanet:2576|MedGen:CN517202	Mulibrey nanism syndrome|not provided	germline	germline	GRCh37	NC_000017.10	17	57141716	57141716	na	na	17q22	criteria provided, single submitter	3	-	N	ClinGen:CA117351,OMIM:605073.0007	3	5246	57141716	C	T	TRIM37:NM_001353085:exon8:c.G398A:p.S133N,TRIM37:NM_001320987:exon9:c.G758A:p.S253N,TRIM37:NM_001353082:exon9:c.G758A:p.S253N,TRIM37:NM_001005207:exon10:c.G860A:p.S287N,TRIM37:NM_001320988:exon10:c.G860A:p.S287N,TRIM37:NM_001320989:exon10:c.G860A:p.S287N,TRIM37:NM_001353083:exon10:c.G125A:p.S42N,TRIM37:NM_001353084:exon10:c.G860A:p.S287N,TRIM37:NM_015294:exon10:c.G860A:p.S287N,TRIM37:NM_001320990…	0.016	pathogenic	0.091	benign	0.642	pathogenic	0.574	pathogenic	3.29	pathogenic	1.0	pathogenic	0.43	benign
POLG2	20315	single nucleotide variant	NM_007215.4(POLG2):c.1352G>A (p.Gly451Glu)	11232	POLG2	HGNC:9180	Likely pathogenic	1	Aug 23, 2023	104894632	-	RCV000005594|RCV003330384	MONDO:MONDO:0012415,MedGen:C1864668,OMIM:610131|	Progressive external ophthalmoplegia with mitochondrial DNA deletions, autosomal dominant 4|POLG2-Related Disorders	germline	germline	GRCh37	NC_000017.10	17	62474046	62474046	na	na	17q23.3	criteria provided, single submitter	2	-	N	ClinGen:CA117371,UniProtKB:Q9UHN1#VAR_029364,OMIM:604983.0001	3	5276	62474046	C	T	POLG2:NM_007215:exon8:c.G1352A:p.G451E	0.003	pathogenic	0.0	pathogenic	1.0	pathogenic	1.0	pathogenic	2.95	pathogenic	1.0	pathogenic	-2.38	pathogenic
NEUROG3	20361	single nucleotide variant	NM_020999.4(NEUROG3):c.319C>A (p.Arg107Ser)	50674	NEUROG3	HGNC:13806	Pathogenic/Likely pathogenic	1	Aug 29, 2022	121917837	-	RCV000005648|RCV003407280	MONDO:MONDO:0012479,MedGen:C1835888,OMIM:610370,Orphanet:83620|	Congenital malabsorptive diarrhea 4|NEUROG3-related condition	germline	germline	GRCh37	NC_000010.10	10	71332481	71332481	na	na	10q22.1	criteria provided, multiple submitters, no conflicts	3	-	N	ClinGen:CA117407,UniProtKB:Q9Y4Z2#VAR_029004,OMIM:604882.0001	3	5322	71332481	G	T	NEUROG3:NM_020999:exon2:c.C319A:p.R107S	0.0	pathogenic	0.0	pathogenic	1.0	pathogenic	0.998	pathogenic	3.83	pathogenic	0.95	pathogenic	-5.05	pathogenic
NEUROG3	20362	single nucleotide variant	NM_020999.4(NEUROG3):c.278G>T (p.Arg93Leu)	50674	NEUROG3	HGNC:13806	Pathogenic/Likely pathogenic	1	Aug 30, 2021	121917838	-	RCV000005649|RCV001851676	MONDO:MONDO:0012479,MedGen:C1835888,OMIM:610370,Orphanet:83620|MedGen:CN517202	Congenital malabsorptive diarrhea 4|not provided	germline;maternal	germline	GRCh37	NC_000010.10	10	71332522	71332522	na	na	10q22.1	criteria provided, multiple submitters, no conflicts	4	-	N	ClinGen:CA117408,UniProtKB:Q9Y4Z2#VAR_029003,OMIM:604882.0002	3	5323	71332522	C	A	NEUROG3:NM_020999:exon2:c.G278T:p.R93L	0.0	pathogenic	0.0	pathogenic	1.0	pathogenic	1.0	pathogenic	4.255	pathogenic	0.94	pathogenic	-3.34	pathogenic
CHEK2	20631	single nucleotide variant	NM_007194.4(CHEK2):c.433C>T (p.Arg145Trp)	11200	CHEK2	HGNC:16627	Likely pathogenic	1	Nov 22, 2023	137853007	-	RCV000005940|RCV000120554|RCV000116016|RCV000197612|RCV000381571|RCV000505730|RCV000587420|RCV001358124|RCV003162212|RCV003149565|RCV003224854	MedGen:C1836482,OMIM:609265,Orphanet:524|MedGen:CN169374|MONDO:MONDO:0015356,MeSH:D009386,MedGen:C0027672,Orphanet:140162|MONDO:MONDO:0016419,MedGen:C0346153,OMIM:114480,Orphanet:227535|MedGen:CN239278|MedGen:C3661900|MONDO:MONDO:0018875,MedGen:C0085390,OMIM:PS151623,Orphanet:524|MONDO:MONDO:0007254,MedGen:C0006142|Human Phenotype Ontology:HP:0012126,MONDO:MONDO:0001056,MeSH:D013274,MedGen:C00246…	Li-Fraumeni syndrome 2|not specified|Hereditary cancer-predisposing syndrome|Familial cancer of breast|CHEK2-Related Cancer Susceptibility|not provided|Li-Fraumeni syndrome|Malignant tumor of breast|Stomach cancer|Breast and/or ovarian cancer|Li-Fraumeni syndrome 1	germline;unknown	germline	GRCh37	NC_000022.10	22	29121242	29121242	na	na	22q12.1	criteria provided, multiple submitters, no conflicts	28	-	N	ClinGen:CA117632,UniProtKB:O96017#VAR_008554,OMIM:604373.0003	3	5592	29121242	G	A	CHEK2:NM_001349956:exon3:c.C433T:p.R145W,CHEK2:NM_007194:exon3:c.C433T:p.R145W,CHEK2:NM_145862:exon3:c.C433T:p.R145W,CHEK2:NM_001005735:exon4:c.C562T:p.R188W	0.001	pathogenic	0.001	pathogenic	1.0	pathogenic	0.999	pathogenic	2.855	pathogenic	1.0	pathogenic	-2.26	pathogenic
TINF2	20663	single nucleotide variant	NM_001099274.3(TINF2):c.838A>G (p.Lys280Glu)	26277	TINF2	HGNC:11824	Pathogenic	1	Oct 04, 2023	121918543	-	RCV000005977|RCV000032165|RCV003441705	MONDO:MONDO:0013522,MedGen:C3151445,OMIM:613990|MONDO:MONDO:0007485,MedGen:C4551974,OMIM:127550,Orphanet:1775|MedGen:C3661900	Dyskeratosis congenita, autosomal dominant 3|Dyskeratosis congenita, autosomal dominant 1|not provided	germline;unknown	germline	GRCh37	NC_000014.8	14	24709848	24709848	na	na	14q12	criteria provided, single submitter	3	-	N	ClinGen:CA117650,UniProtKB:Q9BSI4#VAR_043914,OMIM:604319.0001	3	5624	24709848	T	C	TINF2:NM_001363668:exon5:c.A733G:p.K245E,TINF2:NM_001099274:exon6:c.A838G:p.K280E,TINF2:NM_012461:exon6:c.A838G:p.K280E	0.0	pathogenic	0.0	pathogenic	1.0	pathogenic	0.997	pathogenic	1.975	pathogenic	0.95	pathogenic	-2.77	pathogenic
TINF2	20664	single nucleotide variant	NM_001099274.3(TINF2):c.845G>A (p.Arg282His)	26277	TINF2	HGNC:11824	Pathogenic	1	Apr 02, 2022	121918544	-	RCV000005978|RCV000005979|RCV001509450|RCV001382425|RCV002490324	MONDO:MONDO:0013522,MedGen:C3151445,OMIM:613990|MONDO:MONDO:0009990,MedGen:C1327916,OMIM:268130,Orphanet:3088|MedGen:CN517202|MONDO:MONDO:0015780,MedGen:C0265965,OMIM:PS127550,Orphanet:1775|MONDO:MONDO:0013522,MedGen:C3151445,OMIM:613990;MONDO:MONDO:0007485,MedGen:C4551974,OMIM:127550,Orphanet:1775;MONDO:MONDO:0009990,MedGen:C1327916,OMIM:268130,Orphanet:3088	Dyskeratosis congenita, autosomal dominant 3|Revesz syndrome|not provided|Dyskeratosis congenita|Dyskeratosis congenita, autosomal dominant 3;Dyskeratosis congenita, autosomal dominant 1;Revesz syndrome	de novo;germline;unknown	germline	GRCh37	NC_000014.8	14	24709841	24709841	na	na	14q12	criteria provided, multiple submitters, no conflicts	8	-	N	ClinGen:CA117651,UniProtKB:Q9BSI4#VAR_043915,OMIM:604319.0002	3	5625	24709841	C	T	TINF2:NM_001363668:exon5:c.G740A:p.R247H,TINF2:NM_001099274:exon6:c.G845A:p.R282H,TINF2:NM_012461:exon6:c.G845A:p.R282H	0.0	pathogenic	0.0	pathogenic	0.76	pathogenic	0.147	benign	1.975	pathogenic	0.99	pathogenic	-2.96	pathogenic
TINF2	20665	single nucleotide variant	NM_001099274.3(TINF2):c.844C>A (p.Arg282Ser)	26277	TINF2	HGNC:11824	Pathogenic	1	Aug 13, 2021	121918545	-	RCV000005980|RCV000032168|RCV001382426	MONDO:MONDO:0013522,MedGen:C3151445,OMIM:613990|MONDO:MONDO:0007485,MedGen:C4551974,OMIM:127550,Orphanet:1775|MONDO:MONDO:0015780,MedGen:C0265965,OMIM:PS127550,Orphanet:1775	Dyskeratosis congenita, autosomal dominant 3|Dyskeratosis congenita, autosomal dominant 1|Dyskeratosis congenita	germline;unknown	germline	GRCh37	NC_000014.8	14	24709842	24709842	na	na	14q12	criteria provided, single submitter	3	-	N	ClinGen:CA117652,UniProtKB:Q9BSI4#VAR_043916,OMIM:604319.0003	3	5626	24709842	G	T	TINF2:NM_001363668:exon5:c.C739A:p.R247S,TINF2:NM_001099274:exon6:c.C844A:p.R282S,TINF2:NM_012461:exon6:c.C844A:p.R282S	0.0	pathogenic	0.0	pathogenic	0.997	pathogenic	0.917	pathogenic	1.975	pathogenic	1.0	pathogenic	-2.94	pathogenic
TINF2	20666	single nucleotide variant	NM_001099274.3(TINF2):c.844C>T (p.Arg282Cys)	26277	TINF2	HGNC:11824	Pathogenic	1	Sep 01, 2022	121918545	-	RCV000005981|RCV000032169|RCV000434257|RCV001054196	MONDO:MONDO:0013522,MedGen:C3151445,OMIM:613990|MONDO:MONDO:0007485,MedGen:C4551974,OMIM:127550,Orphanet:1775|MedGen:CN517202|MONDO:MONDO:0015780,MedGen:C0265965,OMIM:PS127550,Orphanet:1775	Dyskeratosis congenita, autosomal dominant 3|Dyskeratosis congenita, autosomal dominant 1|not provided|Dyskeratosis congenita	germline;unknown	germline	GRCh37	NC_000014.8	14	24709842	24709842	na	na	14q12	criteria provided, multiple submitters, no conflicts	7	-	N	ClinGen:CA117653,OMIM:604319.0004	3	5627	24709842	G	A	TINF2:NM_001363668:exon5:c.C739T:p.R247C,TINF2:NM_001099274:exon6:c.C844T:p.R282C,TINF2:NM_012461:exon6:c.C844T:p.R282C	0.0	pathogenic	0.0	pathogenic	1.0	pathogenic	0.963	pathogenic	1.975	pathogenic	1.0	pathogenic	-2.97	pathogenic
KISS1R	20798	single nucleotide variant	NM_032551.5(KISS1R):c.305T>C (p.Leu102Pro)	84634	KISS1R	HGNC:4510	Pathogenic/Likely pathogenic	1	Nov 02, 2021	104894703	-	RCV000030882|RCV001197427|RCV001311147	MedGen:C4016875|MONDO:MONDO:0008302,MedGen:C3805879,OMIM:176400,Orphanet:759|MedGen:C3661900	Hypogonadotropic hypogonadism 8 without anosmia|Centra precocious puberty 1|not provided	germline;unknown	germline	GRCh37	NC_000019.9	19	918604	918604	na	na	19p13.3	criteria provided, multiple submitters, no conflicts	5	-	N	ClinGen:CA130187,UniProtKB:Q969F8#VAR_043906,OMIM:604161.0005	3	5759	918604	T	C	KISS1R:NM_032551:exon2:c.T305C:p.L102P	0.041	pathogenic	0.122	benign	0.949	pathogenic	0.853	pathogenic	2.46	pathogenic	0.89	pathogenic	1.13	benign
EIF2B5	20981	single nucleotide variant	NM_003907.3(EIF2B5):c.271A>G (p.Thr91Ala)	8893	EIF2B5	HGNC:3261	Pathogenic/Likely pathogenic	1	Sep 13, 2022	28939717	-	RCV000006305|RCV000255738|RCV003221408	MONDO:MONDO:0800448,MedGen:C1858991,OMIM:PS603896,Orphanet:135,Orphanet:99853|MedGen:C3661900|MedGen:C5779973,OMIM:620315	Vanishing white matter disease|not provided|Leukoencephalopathy with vanishing white matter 5	germline;unknown	germline	GRCh37	NC_000003.11	3	183854475	183854475	na	na	3q27.1	criteria provided, multiple submitters, no conflicts	10	-	N	ClinGen:CA340473,UniProtKB:Q13144#VAR_012291,OMIM:603945.0001	3	5942	183854475	A	G	EIF2B5:NM_003907:exon2:c.A271G:p.T91A	0.066	benign	0.0	pathogenic	0.997	pathogenic	0.985	pathogenic	0.955	pathogenic	0.91	pathogenic	-3.29	pathogenic
EIF2B5	20984	single nucleotide variant	NM_003907.3(EIF2B5):c.338G>A (p.Arg113His)	8893	EIF2B5	HGNC:3261	Pathogenic	1	Jul 27, 2023	113994049	-	RCV000006308|RCV000254893|RCV001420331|RCV003221411	MONDO:MONDO:0800448,MedGen:C1858991,OMIM:PS603896,Orphanet:135,Orphanet:99853|MedGen:C3661900||MedGen:C5779973,OMIM:620315	Vanishing white matter disease|not provided|See cases|Leukoencephalopathy with vanishing white matter 5	germline;maternal;paternal;unknown	germline	GRCh37	NC_000003.11	3	183855425	183855425	na	na	3q27.1	criteria provided, multiple submitters, no conflicts	21	-	N	ClinGen:CA117878,UniProtKB:Q13144#VAR_012292,OMIM:603945.0004	3	5945	183855425	G	A	EIF2B5:NM_003907:exon3:c.G338A:p.R113H	-	-	-	-	0.002	benign	0.003	benign	2.215	pathogenic	-	-	-4.65	pathogenic
EIF2B5	20985	single nucleotide variant	NM_003907.3(EIF2B5):c.584G>A (p.Arg195His)	8893	EIF2B5	HGNC:3261	Pathogenic	1	Sep 14, 2022	113994054	-	RCV000006310|RCV001064868|RCV003221412	MONDO:MONDO:0800448,MedGen:C1858991,OMIM:PS603896,Orphanet:135,Orphanet:99853|MedGen:C3661900|MedGen:C5779973,OMIM:620315	Vanishing white matter disease|not provided|Leukoencephalopathy with vanishing white matter 5	germline	germline	GRCh37	NC_000003.11	3	183855763	183855763	na	na	3q27.1	criteria provided, single submitter	4	-	N	ClinGen:CA340476,UniProtKB:Q13144#VAR_016846,OMIM:603945.0005	3	5946	183855763	G	A	EIF2B5:NM_003907:exon4:c.G584A:p.R195H	-	-	-	-	1.0	pathogenic	0.998	pathogenic	3.195	pathogenic	-	-	-5.0	pathogenic
EIF2B5	20987	single nucleotide variant	NM_003907.3(EIF2B5):c.583C>T (p.Arg195Cys)	8893	EIF2B5	HGNC:3261	Likely pathogenic	1	Jun 17, 2022	113994055	-	RCV002512827|RCV003221414	MedGen:C3661900|MedGen:C5779973,OMIM:620315	not provided|Leukoencephalopathy with vanishing white matter 5	germline	germline	GRCh37	NC_000003.11	3	183855762	183855762	na	na	3q27.1	criteria provided, single submitter	2	-	N	ClinGen:CA117879,UniProtKB:Q13144#VAR_016845,OMIM:603945.0007	3	5948	183855762	C	T	EIF2B5:NM_003907:exon4:c.C583T:p.R195C	-	-	-	-	1.0	pathogenic	0.999	pathogenic	3.54	pathogenic	-	-	-5.02	pathogenic
EIF2B5	20988	single nucleotide variant	NM_003907.3(EIF2B5):c.545C>T (p.Thr182Met)	8893	EIF2B5	HGNC:3261	Pathogenic/Likely pathogenic	1	Mar 09, 2022	113994053	-	RCV000416181|RCV003221415	MedGen:C3661900|MedGen:C5779973,OMIM:620315	not provided|Leukoencephalopathy with vanishing white matter 5	germline	germline	GRCh37	NC_000003.11	3	183855724	183855724	na	na	3q27.1	criteria provided, multiple submitters, no conflicts	3	-	N	ClinGen:CA340479,OMIM:603945.0008	3	5949	183855724	C	T	EIF2B5:NM_003907:exon4:c.C545T:p.T182M	-	-	-	-	1.0	pathogenic	0.998	pathogenic	3.46	pathogenic	-	-	-3.26	pathogenic
EIF2B5	20989	single nucleotide variant	NM_003907.3(EIF2B5):c.944G>A (p.Arg315His)	8893	EIF2B5	HGNC:3261	Pathogenic/Likely pathogenic	1	Dec 13, 2022	113994064	-	RCV000006314|RCV001070077|RCV003221416	MONDO:MONDO:0800448,MedGen:C1858991,OMIM:PS603896,Orphanet:135,Orphanet:99853|MedGen:C3661900|MedGen:C5779973,OMIM:620315	Vanishing white matter disease|not provided|Leukoencephalopathy with vanishing white matter 5	germline;unknown	germline	GRCh37	NC_000003.11	3	183858306	183858306	na	na	3q27.1	criteria provided, multiple submitters, no conflicts	5	-	N	ClinGen:CA340481,UniProtKB:Q13144#VAR_012327,OMIM:603945.0009	3	5950	183858306	G	A	EIF2B5:NM_003907:exon7:c.G944A:p.R315H	-	-	-	-	0.071	benign	0.009	benign	1.165	pathogenic	-	-	-3.92	pathogenic
EIF2B5	20990	single nucleotide variant	NM_003907.3(EIF2B5):c.166T>G (p.Phe56Val)	8893	EIF2B5	HGNC:3261	Likely pathogenic	1	Aug 12, 2021	113994043	-	RCV001851695|RCV003221417	MedGen:C3661900|MedGen:C5779973,OMIM:620315	not provided|Leukoencephalopathy with vanishing white matter 5	germline	germline	GRCh37	NC_000003.11	3	183853339	183853339	na	na	3q27.1	criteria provided, single submitter	2	-	N	ClinGen:CA340482,OMIM:603945.0010	3	5951	183853339	T	G	EIF2B5:NM_003907:exon1:c.T166G:p.F56V	0.002	pathogenic	0.0	pathogenic	0.999	pathogenic	0.991	pathogenic	2.795	pathogenic	0.93	pathogenic	-3.46	pathogenic
ZFPM2	21166	single nucleotide variant	NM_012082.4(ZFPM2):c.1969A>G (p.Ser657Gly)	23414	ZFPM2	HGNC:16700	Benign/Likely benign	1	Apr 10, 2023	28374544	-	RCV000006501|RCV000467901|RCV003230349	Human Phenotype Ontology:HP:0001636,MONDO:MONDO:0008542,MedGen:C0039685,OMIM:187500,Orphanet:3303|MONDO:MONDO:0014480,MedGen:C4015129,OMIM:616067,Orphanet:251510|MedGen:CN169374	Tetralogy of Fallot|46,XY sex reversal 9|not specified	germline;unknown	germline	GRCh37	NC_000008.10	8	106814279	106814279	na	na	8q23.1	criteria provided, multiple submitters, no conflicts	4	-	N	ClinGen:CA248602,UniProtKB:Q8WW38#VAR_017943,OMIM:603693.0001	3	6127	106814279	A	G	ZFPM2:NM_001362836:exon7:c.A1810G:p.S604G,ZFPM2:NM_001362837:exon8:c.A1573G:p.S525G,ZFPM2:NM_012082:exon8:c.A1969G:p.S657G	0.234	benign	0.206	benign	0.02	benign	0.014	benign	0.895	pathogenic	0.02	benign	2.02	benign
ZFPM2	21167	single nucleotide variant	NM_012082.4(ZFPM2):c.89A>G (p.Glu30Gly)	23414	ZFPM2	HGNC:16700	Benign/Likely benign	1	Aug 01, 2023	121908601	-	RCV000006502|RCV000032713|RCV000172841|RCV000461090|RCV001007696|RCV001573801|RCV001818141	Human Phenotype Ontology:HP:0001636,MONDO:MONDO:0008542,MedGen:C0039685,OMIM:187500,Orphanet:3303|Human Phenotype Ontology:HP:0001719,MONDO:MONDO:0018089,MedGen:C0013069,Orphanet:3426|MONDO:MONDO:0012431,MedGen:C1857781,OMIM:610187,Orphanet:2140|MONDO:MONDO:0014480,MedGen:C4015129,OMIM:616067,Orphanet:251510|MONDO:MONDO:0013066,MedGen:C3489793,OMIM:612965|MedGen:C3661900|MedGen:CN169374	Tetralogy of Fallot|Double outlet right ventricle|Diaphragmatic hernia 3|46,XY sex reversal 9|46,XY sex reversal 3|not provided|not specified	germline	germline	GRCh37	NC_000008.10	8	106431420	106431420	na	na	8q23.1	criteria provided, multiple submitters, no conflicts	7	-	N	ClinGen:CA130351,UniProtKB:Q8WW38#VAR_017942,OMIM:603693.0002	3	6128	106431420	A	G	ZFPM2:NM_012082:exon2:c.A89G:p.E30G	0.011	pathogenic	0.054	benign	0.888	pathogenic	0.537	pathogenic	1.155	pathogenic	0.4	benign	1.95	benign
ZFPM2	21169	single nucleotide variant	NM_012082.4(ZFPM2):c.2107A>C (p.Met703Leu)	23414	ZFPM2	HGNC:16700	Benign/Likely benign	1	Aug 19, 2023	121908603	-	RCV000006504|RCV000032715|RCV001007705|RCV000861889|RCV001529320|RCV003330385	MONDO:MONDO:0012431,MedGen:C1857781,OMIM:610187,Orphanet:2140|Human Phenotype Ontology:HP:0001719,MONDO:MONDO:0018089,MedGen:C0013069,Orphanet:3426|MONDO:MONDO:0013066,MedGen:C3489793,OMIM:612965|MONDO:MONDO:0014480,MedGen:C4015129,OMIM:616067,Orphanet:251510|MedGen:CN517202|MedGen:CN169374	Diaphragmatic hernia 3|Double outlet right ventricle|46,XY sex reversal 3|46,XY sex reversal 9|not provided|not specified	germline	germline	GRCh37	NC_000008.10	8	106814417	106814417	na	na	8q23.1	criteria provided, multiple submitters, no conflicts	7	-	N	ClinGen:CA117963,OMIM:603693.0004	3	6130	106814417	A	C	ZFPM2:NM_001362836:exon7:c.A1948C:p.M650L,ZFPM2:NM_001362837:exon8:c.A1711C:p.M571L,ZFPM2:NM_012082:exon8:c.A2107C:p.M703L	0.073	benign	0.201	benign	0.927	pathogenic	0.945	pathogenic	1.275	pathogenic	0.99	pathogenic	1.64	benign
EPAS1	21508	single nucleotide variant	NM_001430.5(EPAS1):c.1609G>A (p.Gly537Arg)	2034	EPAS1	HGNC:3374	Pathogenic	1	Oct 13, 2022	137853036	-	RCV000006842|RCV001532400	MONDO:MONDO:0012729,MedGen:C2673187,OMIM:611783,Orphanet:247511|MedGen:C3661900	Erythrocytosis, familial, 4|not provided	germline	germline	GRCh37	NC_000002.11	2	46607420	46607420	na	na	2p21	criteria provided, multiple submitters, no conflicts	4	-	N	ClinGen:CA118291,UniProtKB:Q99814#VAR_067361,OMIM:603349.0002	3	6469	46607420	G	A	EPAS1:NM_001430:exon12:c.G1609A:p.G537R	0.0	pathogenic	0.0	pathogenic	1.0	pathogenic	1.0	pathogenic	2.125	pathogenic	0.54	pathogenic	0.44	benign
TP63	21566	single nucleotide variant	NM_003722.5(TP63):c.727C>T (p.Arg243Trp)	8626	TP63	HGNC:15979	Pathogenic	1	Apr 01, 2023	121908835	-	RCV000006900|RCV000394306|RCV000812084|RCV002283440	MONDO:MONDO:0011428,MedGen:C1858562,OMIM:604292,Orphanet:1896|MedGen:C3661900|MedGen:CN239305|MONDO:MONDO:0007508,MedGen:C1785148,OMIM:129400,Orphanet:3022	Ectrodactyly, ectodermal dysplasia, and cleft lip-palate syndrome 3|not provided|TP63-Related Spectrum Disorders|Rapp-Hodgkin ectodermal dysplasia syndrome	germline;unknown	germline	GRCh37	NC_000003.11	3	189582168	189582168	na	na	3q28	criteria provided, multiple submitters, no conflicts	8	-	N	ClinGen:CA118334,UniProtKB:Q9H3D4#VAR_020871,OMIM:603273.0001	3	6527	189582168	C	T	TP63:NM_001329146:exon2:c.C190T:p.R64W,TP63:NM_001329150:exon2:c.C190T:p.R64W,TP63:NM_001114980:exon3:c.C445T:p.R149W,TP63:NM_001114981:exon3:c.C445T:p.R149W,TP63:NM_001114982:exon3:c.C445T:p.R149W,TP63:NM_001329145:exon3:c.C445T:p.R149W,TP63:NM_001329149:exon3:c.C445T:p.R149W,TP63:NM_001114978:exon5:c.C727T:p.R243W,TP63:NM_001114979:exon5:c.C727T:p.R243W,TP63:NM_001329144:exon5:c.C727T:p.R243W,T…	0.0	pathogenic	0.0	pathogenic	1.0	pathogenic	1.0	pathogenic	2.835	pathogenic	1.0	pathogenic	-7.58	pathogenic
TP63	21567	single nucleotide variant	NM_003722.5(TP63):c.728G>A (p.Arg243Gln)	8626	TP63	HGNC:15979	Pathogenic	1	May 22, 2022	121908836	-	RCV000006901|RCV000705452|RCV001804714|RCV002250454	MONDO:MONDO:0011428,MedGen:C1858562,OMIM:604292,Orphanet:1896|MedGen:CN239305|MedGen:CN517202|MONDO:MONDO:0011535,MedGen:C1854442,OMIM:605289,Orphanet:2440	Ectrodactyly, ectodermal dysplasia, and cleft lip-palate syndrome 3|TP63-Related Spectrum Disorders|not provided|Split hand-foot malformation 4	germline	germline	GRCh37	NC_000003.11	3	189582169	189582169	na	na	3q28	criteria provided, multiple submitters, no conflicts	4	-	N	ClinGen:CA118335,UniProtKB:Q9H3D4#VAR_020870,OMIM:603273.0002	3	6528	189582169	G	A	TP63:NM_001329146:exon2:c.G191A:p.R64Q,TP63:NM_001329150:exon2:c.G191A:p.R64Q,TP63:NM_001114980:exon3:c.G446A:p.R149Q,TP63:NM_001114981:exon3:c.G446A:p.R149Q,TP63:NM_001114982:exon3:c.G446A:p.R149Q,TP63:NM_001329145:exon3:c.G446A:p.R149Q,TP63:NM_001329149:exon3:c.G446A:p.R149Q,TP63:NM_001114978:exon5:c.G728A:p.R243Q,TP63:NM_001114979:exon5:c.G728A:p.R243Q,TP63:NM_001329144:exon5:c.G728A:p.R243Q,T…	0.009	pathogenic	0.015	pathogenic	1.0	pathogenic	0.987	pathogenic	2.835	pathogenic	1.0	pathogenic	-7.52	pathogenic
TP63	21571	single nucleotide variant	NM_003722.5(TP63):c.955C>T (p.Arg319Cys)	8626	TP63	HGNC:15979	Pathogenic	1	Jul 05, 2022	121908839	-	RCV000006905|RCV001280776|RCV002512857|RCV003162215	MONDO:MONDO:0011535,MedGen:C1854442,OMIM:605289,Orphanet:2440|MedGen:CN517202|MedGen:CN239305|MONDO:MONDO:0011428,MedGen:C1858562,OMIM:604292,Orphanet:1896	Split hand-foot malformation 4|not provided|TP63-Related Spectrum Disorders|Ectrodactyly, ectodermal dysplasia, and cleft lip-palate syndrome 3	germline	germline	GRCh37	NC_000003.11	3	189585694	189585694	na	na	3q28	criteria provided, multiple submitters, no conflicts	7	-	N	ClinGen:CA118338,UniProtKB:Q9H3D4#VAR_020874,OMIM:603273.0006	3	6532	189585694	C	T	TP63:NM_001329146:exon4:c.C418T:p.R140C,TP63:NM_001329150:exon4:c.C418T:p.R140C,TP63:NM_001114980:exon5:c.C673T:p.R225C,TP63:NM_001114981:exon5:c.C673T:p.R225C,TP63:NM_001114982:exon5:c.C673T:p.R225C,TP63:NM_001329145:exon5:c.C673T:p.R225C,TP63:NM_001329149:exon5:c.C673T:p.R225C,TP63:NM_001114978:exon7:c.C955T:p.R319C,TP63:NM_001114979:exon7:c.C955T:p.R319C,TP63:NM_001329144:exon7:c.C955T:p.R319C…	0.0	pathogenic	0.0	pathogenic	1.0	pathogenic	0.997	pathogenic	2.825	pathogenic	1.0	pathogenic	-7.34	pathogenic
TP63	21572	single nucleotide variant	NM_003722.5(TP63):c.953G>A (p.Arg318His)	8626	TP63	HGNC:15979	Pathogenic/Likely pathogenic	1	Sep 08, 2022	121908840	-	RCV000006906|RCV000006907|RCV000478736|RCV000548176	MONDO:MONDO:0011428,MedGen:C1858562,OMIM:604292,Orphanet:1896|MONDO:MONDO:0007508,MedGen:C1785148,OMIM:129400,Orphanet:3022|MedGen:CN517202|MedGen:CN239305	Ectrodactyly, ectodermal dysplasia, and cleft lip-palate syndrome 3|Rapp-Hodgkin ectodermal dysplasia syndrome|not provided|TP63-Related Spectrum Disorders	de novo;germline	germline	GRCh37	NC_000003.11	3	189585692	189585692	na	na	3q28	criteria provided, multiple submitters, no conflicts	6	-	N	ClinGen:CA118339,UniProtKB:Q9H3D4#VAR_020873,OMIM:603273.0007	3	6533	189585692	G	A	TP63:NM_001329146:exon4:c.G416A:p.R139H,TP63:NM_001329150:exon4:c.G416A:p.R139H,TP63:NM_001114980:exon5:c.G671A:p.R224H,TP63:NM_001114981:exon5:c.G671A:p.R224H,TP63:NM_001114982:exon5:c.G671A:p.R224H,TP63:NM_001329145:exon5:c.G671A:p.R224H,TP63:NM_001329149:exon5:c.G671A:p.R224H,TP63:NM_001114978:exon7:c.G953A:p.R318H,TP63:NM_001114979:exon7:c.G953A:p.R318H,TP63:NM_001329144:exon7:c.G953A:p.R318H…	0.0	pathogenic	0.001	pathogenic	1.0	pathogenic	0.987	pathogenic	2.935	pathogenic	1.0	pathogenic	-7.32	pathogenic
TP63	21573	single nucleotide variant	NM_003722.5(TP63):c.1028G>A (p.Arg343Gln)	8626	TP63	HGNC:15979	Pathogenic/Likely pathogenic	1	Jul 01, 2023	121908841	-	RCV000006908|RCV000276670|RCV000655484|RCV001266717	MONDO:MONDO:0011428,MedGen:C1858562,OMIM:604292,Orphanet:1896|MedGen:C3661900|MedGen:CN239305|MeSH:D030342,MedGen:C0950123	Ectrodactyly, ectodermal dysplasia, and cleft lip-palate syndrome 3|not provided|TP63-Related Spectrum Disorders|Inborn genetic diseases	germline	germline	GRCh37	NC_000003.11	3	189586404	189586404	na	na	3q28	criteria provided, multiple submitters, no conflicts	6	-	N	ClinGen:CA118340,UniProtKB:Q9H3D4#VAR_020876,OMIM:603273.0008	3	6534	189586404	G	A	TP63:NM_001329146:exon5:c.G491A:p.R164Q,TP63:NM_001329150:exon5:c.G491A:p.R164Q,TP63:NM_001114980:exon6:c.G746A:p.R249Q,TP63:NM_001114981:exon6:c.G746A:p.R249Q,TP63:NM_001114982:exon6:c.G746A:p.R249Q,TP63:NM_001329145:exon6:c.G746A:p.R249Q,TP63:NM_001329149:exon6:c.G746A:p.R249Q,TP63:NM_001114978:exon8:c.G1028A:p.R343Q,TP63:NM_001114979:exon8:c.G1028A:p.R343Q,TP63:NM_001329144:exon8:c.G1028A:p.R3…	0.0	pathogenic	0.0	pathogenic	1.0	pathogenic	0.986	pathogenic	2.89	pathogenic	1.0	pathogenic	-7.28	pathogenic
TP63	21575	single nucleotide variant	NM_003722.5(TP63):c.1681T>G (p.Cys561Gly)	8626	TP63	HGNC:15979	Likely pathogenic	1	Sep 01, 2021	121908843	-	RCV000006910|RCV001067605	MONDO:MONDO:0007124,MedGen:C0406709,OMIM:106260,Orphanet:1071|MedGen:CN239305	Ankyloblepharon-ectodermal defects-cleft lip/palate syndrome|TP63-Related Spectrum Disorders	germline	germline	GRCh37	NC_000003.11	3	189608606	189608606	na	na	3q28	criteria provided, single submitter	2	-	N	ClinGen:CA253875,UniProtKB:Q9H3D4#VAR_020881,OMIM:603273.0010	3	6536	189608606	T	G	TP63:NM_001329146:exon10:c.T1144G:p.C382G,TP63:NM_001114980:exon11:c.T1399G:p.C467G,TP63:NM_001329148:exon13:c.T1669G:p.C557G,TP63:NM_001329964:exon13:c.T1675G:p.C559G,TP63:NM_003722:exon13:c.T1681G:p.C561G	0.003	pathogenic	0.002	pathogenic	0.999	pathogenic	0.988	pathogenic	2.125	pathogenic	0.99	pathogenic	-1.98	pathogenic
TP63	21579	single nucleotide variant	NM_003722.5(TP63):c.1010G>A (p.Arg337Gln)	8626	TP63	HGNC:15979	Pathogenic/Likely pathogenic	1	Aug 22, 2022	113993967	-	RCV000006914|RCV000794231|RCV001781195	MONDO:MONDO:0007072,MedGen:C1863204,OMIM:103285,Orphanet:978|MedGen:CN239305|MedGen:CN517202	ADULT syndrome|TP63-Related Spectrum Disorders|not provided	germline	germline	GRCh37	NC_000003.11	3	189586386	189586386	na	na	3q28	criteria provided, multiple submitters, no conflicts	3	-	N	ClinGen:CA340599,UniProtKB:Q9H3D4#VAR_020875,OMIM:603273.0014	3	6540	189586386	G	A	TP63:NM_001329146:exon5:c.G473A:p.R158Q,TP63:NM_001329150:exon5:c.G473A:p.R158Q,TP63:NM_001114980:exon6:c.G728A:p.R243Q,TP63:NM_001114981:exon6:c.G728A:p.R243Q,TP63:NM_001114982:exon6:c.G728A:p.R243Q,TP63:NM_001329145:exon6:c.G728A:p.R243Q,TP63:NM_001329149:exon6:c.G728A:p.R243Q,TP63:NM_001114978:exon8:c.G1010A:p.R337Q,TP63:NM_001114979:exon8:c.G1010A:p.R337Q,TP63:NM_001329144:exon8:c.G1010A:p.R3…	0.0	pathogenic	0.038	pathogenic	1.0	pathogenic	0.99	pathogenic	2.825	pathogenic	1.0	pathogenic	-7.28	pathogenic
TP63	21580	single nucleotide variant	NM_003722.5(TP63):c.1052A>G (p.Asp351Gly)	8626	TP63	HGNC:15979	Pathogenic	1	May 18, 2016	121908844	-	RCV000006915|RCV000326964	MONDO:MONDO:0011428,MedGen:C1858562,OMIM:604292,Orphanet:1896|MedGen:CN517202	Ectrodactyly, ectodermal dysplasia, and cleft lip-palate syndrome 3|not provided	germline	germline	GRCh37	NC_000003.11	3	189586428	189586428	na	na	3q28	criteria provided, single submitter	2	-	N	ClinGen:CA118341,UniProtKB:Q9H3D4#VAR_020878,OMIM:603273.0015	3	6541	189586428	A	G	TP63:NM_001329146:exon5:c.A515G:p.D172G,TP63:NM_001329150:exon5:c.A515G:p.D172G,TP63:NM_001114980:exon6:c.A770G:p.D257G,TP63:NM_001114981:exon6:c.A770G:p.D257G,TP63:NM_001114982:exon6:c.A770G:p.D257G,TP63:NM_001329145:exon6:c.A770G:p.D257G,TP63:NM_001329149:exon6:c.A770G:p.D257G,TP63:NM_001114978:exon8:c.A1052G:p.D351G,TP63:NM_001114979:exon8:c.A1052G:p.D351G,TP63:NM_001329144:exon8:c.A1052G:p.D3…	0.0	pathogenic	0.004	pathogenic	0.999	pathogenic	0.997	pathogenic	2.845	pathogenic	1.0	pathogenic	-7.35	pathogenic
TP63	21587	single nucleotide variant	NM_003722.5(TP63):c.1009C>G (p.Arg337Gly)	8626	TP63	HGNC:15979	Pathogenic	1	Oct 19, 2020	113993966	-	RCV000006923|RCV001280741	MONDO:MONDO:0007072,MedGen:C1863204,OMIM:103285,Orphanet:978|MedGen:CN517202	ADULT syndrome|not provided	germline	germline	GRCh37	NC_000003.11	3	189586385	189586385	na	na	3q28	criteria provided, single submitter	2	-	N	ClinGen:CA340600,OMIM:603273.0022	3	6548	189586385	C	G	TP63:NM_001329146:exon5:c.C472G:p.R158G,TP63:NM_001329150:exon5:c.C472G:p.R158G,TP63:NM_001114980:exon6:c.C727G:p.R243G,TP63:NM_001114981:exon6:c.C727G:p.R243G,TP63:NM_001114982:exon6:c.C727G:p.R243G,TP63:NM_001329145:exon6:c.C727G:p.R243G,TP63:NM_001329149:exon6:c.C727G:p.R243G,TP63:NM_001114978:exon8:c.C1009G:p.R337G,TP63:NM_001114979:exon8:c.C1009G:p.R337G,TP63:NM_001329144:exon8:c.C1009G:p.R3…	0.001	pathogenic	0.001	pathogenic	0.999	pathogenic	0.992	pathogenic	2.825	pathogenic	1.0	pathogenic	-7.31	pathogenic
TP63	21589	single nucleotide variant	NM_003722.5(TP63):c.797G>A (p.Arg266Gln)	8626	TP63	HGNC:15979	Pathogenic/Likely pathogenic	1	Aug 07, 2022	121908849	-	RCV000006925|RCV000006926|RCV000413620|RCV001390108	MONDO:MONDO:0011428,MedGen:C1858562,OMIM:604292,Orphanet:1896|MONDO:MONDO:0007072,MedGen:C1863204,OMIM:103285,Orphanet:978|MedGen:CN517202|MedGen:CN239305	Ectrodactyly, ectodermal dysplasia, and cleft lip-palate syndrome 3|ADULT syndrome|not provided|TP63-Related Spectrum Disorders	germline	germline	GRCh37	NC_000003.11	3	189584501	189584501	na	na	3q28	criteria provided, multiple submitters, no conflicts	6	-	N	ClinGen:CA118348,UniProtKB:Q9H3D4#VAR_032738,OMIM:603273.0024	3	6550	189584501	G	A	TP63:NM_001329146:exon3:c.G260A:p.R87Q,TP63:NM_001329150:exon3:c.G260A:p.R87Q,TP63:NM_001114980:exon4:c.G515A:p.R172Q,TP63:NM_001114981:exon4:c.G515A:p.R172Q,TP63:NM_001114982:exon4:c.G515A:p.R172Q,TP63:NM_001329145:exon4:c.G515A:p.R172Q,TP63:NM_001329149:exon4:c.G515A:p.R172Q,TP63:NM_001114978:exon6:c.G797A:p.R266Q,TP63:NM_001114979:exon6:c.G797A:p.R266Q,TP63:NM_001329144:exon6:c.G797A:p.R266Q,T…	0.0	pathogenic	0.017	pathogenic	0.982	pathogenic	0.487	benign	2.02	pathogenic	1.0	pathogenic	-7.28	pathogenic
BMPR1B	21595	single nucleotide variant	NM_001203.3(BMPR1B):c.1456C>T (p.Arg486Trp)	658	BMPR1B	HGNC:1077	Pathogenic	1	Dec 12, 2022	121434418	-	RCV000006934|RCV003233066	Human Phenotype Ontology:HP:0009372,MONDO:MONDO:0007216,MedGen:C1832702,OMIM:112600,Orphanet:93396|MedGen:C3661900	Brachydactyly type A2|not provided	germline	germline	GRCh37	NC_000004.11	4	96075771	96075771	na	na	4q22.3	criteria provided, single submitter	2	-	N	ClinGen:CA118354,UniProtKB:O00238#VAR_023820,OMIM:603248.0002	3	6556	96075771	C	T	BMPR1B:NM_001256792:exon11:c.C1456T:p.R486W,BMPR1B:NM_001256793:exon11:c.C1546T:p.R516W,BMPR1B:NM_001256794:exon11:c.C1456T:p.R486W,BMPR1B:NM_001203:exon13:c.C1456T:p.R486W	0.0	pathogenic	0.0	pathogenic	1.0	pathogenic	1.0	pathogenic	2.995	pathogenic	0.99	pathogenic	-3.24	pathogenic
BMPR1B	21597	single nucleotide variant	NM_001203.3(BMPR1B):c.1457G>A (p.Arg486Gln)	658	BMPR1B	HGNC:1077	Likely pathogenic	1	Aug 16, 2023	121434419	-	RCV000006936|RCV003398455	Human Phenotype Ontology:HP:0009372,MONDO:MONDO:0007216,MedGen:C1832702,OMIM:112600,Orphanet:93396|	Brachydactyly type A2|BMPR1B-related condition	germline	germline	GRCh37	NC_000004.11	4	96075772	96075772	na	na	4q22.3	criteria provided, single submitter	2	-	N	ClinGen:CA118355,UniProtKB:O00238#VAR_037967,OMIM:603248.0004	3	6558	96075772	G	A	BMPR1B:NM_001256792:exon11:c.G1457A:p.R486Q,BMPR1B:NM_001256793:exon11:c.G1547A:p.R516Q,BMPR1B:NM_001256794:exon11:c.G1457A:p.R486Q,BMPR1B:NM_001203:exon13:c.G1457A:p.R486Q	0.0	pathogenic	0.0	pathogenic	1.0	pathogenic	0.999	pathogenic	0.735	benign	1.0	pathogenic	-3.05	pathogenic
DYSF	21707	single nucleotide variant	NM_001130987.2(DYSF):c.6241C>T (p.Arg2081Cys)	8291	DYSF	HGNC:3097	Pathogenic/Likely pathogenic	1	Aug 22, 2022	121908955	-	RCV000007052|RCV000007051|RCV000080320|RCV000815134|RCV001813961	MONDO:MONDO:0009676,MedGen:C1850889,OMIM:253601,Orphanet:268|MONDO:MONDO:0024545,MedGen:C4551973,OMIM:254130,Orphanet:45448|MedGen:C3661900|MONDO:MONDO:0016145,MedGen:C2931687,Orphanet:207073|Human Phenotype Ontology:HP:0003011,Human Phenotype Ontology:HP:0003197,Human Phenotype Ontology:HP:0003708,MedGen:C4021745	Autosomal recessive limb-girdle muscular dystrophy type 2B|Miyoshi muscular dystrophy 1|not provided|Qualitative or quantitative defects of dysferlin|Abnormality of the musculature	germline;unknown	germline	GRCh37	NC_000002.11	2	71909727	71909727	na	na	2p13.2	criteria provided, multiple submitters, no conflicts	11	-	N	ClinGen:CA222203,UniProtKB:O75923#VAR_012311,OMIM:603009.0004	3	6668	71909727	C	T	DYSF:NM_001130976:exon53:c.C6082T:p.R2028C,DYSF:NM_001130986:exon53:c.C6085T:p.R2029C,DYSF:NM_001130455:exon54:c.C6127T:p.R2043C,DYSF:NM_001130977:exon54:c.C6145T:p.R2049C,DYSF:NM_001130980:exon54:c.C6175T:p.R2059C,DYSF:NM_001130984:exon54:c.C6148T:p.R2050C,DYSF:NM_001130985:exon54:c.C6178T:p.R2060C,DYSF:NM_003494:exon54:c.C6124T:p.R2042C,DYSF:NM_001130978:exon55:c.C6187T:p.R2063C,DYSF:NM_0011309…	0.0	pathogenic	0.001	pathogenic	1.0	pathogenic	0.999	pathogenic	3.155	pathogenic	1.0	pathogenic	-1.78	pathogenic
DYSF	21710	single nucleotide variant	NM_001130987.2(DYSF):c.2426C>G (p.Pro809Arg)	8291	DYSF	HGNC:3097	Pathogenic	1	Apr 20, 2022	121908956	-	RCV000007055|RCV000007056|RCV000807968|RCV000790785	MONDO:MONDO:0009676,MedGen:C1850889,OMIM:253601,Orphanet:268|MONDO:MONDO:0024545,MedGen:C4551973,OMIM:254130,Orphanet:45448|MONDO:MONDO:0016145,MedGen:C2931687,Orphanet:207073|MedGen:C3661900	Autosomal recessive limb-girdle muscular dystrophy type 2B|Miyoshi muscular dystrophy 1|Qualitative or quantitative defects of dysferlin|not provided	germline	germline	GRCh37	NC_000002.11	2	71791204	71791204	na	na	2p13.2	criteria provided, multiple submitters, no conflicts	3	-	N	ClinGen:CA222139,UniProtKB:O75923#VAR_012308,OMIM:603009.0007	3	6671	71791204	C	G	DYSF:NM_001130976:exon23:c.C2330G:p.P777R,DYSF:NM_001130977:exon23:c.C2330G:p.P777R,DYSF:NM_001130984:exon23:c.C2333G:p.P778R,DYSF:NM_001130986:exon23:c.C2333G:p.P778R,DYSF:NM_001130455:exon24:c.C2375G:p.P792R,DYSF:NM_001130978:exon24:c.C2372G:p.P791R,DYSF:NM_001130980:exon24:c.C2423G:p.P808R,DYSF:NM_001130981:exon24:c.C2423G:p.P808R,DYSF:NM_001130983:exon24:c.C2375G:p.P792R,DYSF:NM_001130985:exo…	0.0	pathogenic	0.001	pathogenic	1.0	pathogenic	1.0	pathogenic	3.475	pathogenic	1.0	pathogenic	-1.52	pathogenic
DYSF	21713	single nucleotide variant	NM_001130987.2(DYSF):c.3051G>T (p.Trp1017Cys)	8291	DYSF	HGNC:3097	Pathogenic	1	Aug 30, 2022	28937581	-	RCV000007059|RCV000176869|RCV000790765|RCV001232546	MONDO:MONDO:0024545,MedGen:C4551973,OMIM:254130,Orphanet:45448|MONDO:MONDO:0009676,MedGen:C1850889,OMIM:253601,Orphanet:268|MedGen:C3661900|MONDO:MONDO:0016145,MedGen:C2931687,Orphanet:207073	Miyoshi muscular dystrophy 1|Autosomal recessive limb-girdle muscular dystrophy type 2B|not provided|Qualitative or quantitative defects of dysferlin	germline;paternal;unknown	germline	GRCh37	NC_000002.11	2	71797430	71797430	na	na	2p13.2	criteria provided, multiple submitters, no conflicts	7	-	N	ClinGen:CA222147,UniProtKB:O75923#VAR_057857,OMIM:603009.0010	3	6674	71797430	G	T	DYSF:NM_001130976:exon27:c.G2955T:p.W985C,DYSF:NM_001130977:exon27:c.G2955T:p.W985C,DYSF:NM_001130984:exon27:c.G2958T:p.W986C,DYSF:NM_001130986:exon27:c.G2958T:p.W986C,DYSF:NM_001130455:exon28:c.G3000T:p.W1000C,DYSF:NM_001130978:exon28:c.G2997T:p.W999C,DYSF:NM_001130980:exon28:c.G3048T:p.W1016C,DYSF:NM_001130981:exon28:c.G3048T:p.W1016C,DYSF:NM_001130983:exon28:c.G3000T:p.W1000C,DYSF:NM_001130985…	0.0	pathogenic	0.0	pathogenic	1.0	pathogenic	1.0	pathogenic	3.615	pathogenic	1.0	pathogenic	-7.61	pathogenic
DYSF	21714	single nucleotide variant	NM_001130987.2(DYSF):c.3191G>A (p.Arg1064His)	8291	DYSF	HGNC:3097	Pathogenic/Likely pathogenic	1	Oct 04, 2022	121908958	-	RCV000007060|RCV000176936|RCV000763088|RCV000790688|RCV001229764	MONDO:MONDO:0024545,MedGen:C4551973,OMIM:254130,Orphanet:45448|MONDO:MONDO:0009676,MedGen:C1850889,OMIM:253601,Orphanet:268|MONDO:MONDO:0011721,MedGen:C1847532,OMIM:606768,Orphanet:178400;MONDO:MONDO:0009676,MedGen:C1850889,OMIM:253601,Orphanet:268;MONDO:MONDO:0024545,MedGen:C4551973,OMIM:254130,Orphanet:45448|MedGen:C3661900|MONDO:MONDO:0016145,MedGen:C2931687,Orphanet:207073	Miyoshi muscular dystrophy 1|Autosomal recessive limb-girdle muscular dystrophy type 2B|Distal myopathy with anterior tibial onset;Autosomal recessive limb-girdle muscular dystrophy type 2B;Miyoshi muscular dystrophy 1|not provided|Qualitative or quantitative defects of dysferlin	germline;unknown	germline	GRCh37	NC_000002.11	2	71797834	71797834	na	na	2p13.2	criteria provided, multiple submitters, no conflicts	8	-	N	ClinGen:CA222152,UniProtKB:O75923#VAR_024863,OMIM:603009.0011	3	6675	71797834	G	A	DYSF:NM_001130976:exon28:c.G3095A:p.R1032H,DYSF:NM_001130977:exon28:c.G3095A:p.R1032H,DYSF:NM_001130984:exon28:c.G3098A:p.R1033H,DYSF:NM_001130986:exon28:c.G3098A:p.R1033H,DYSF:NM_001130455:exon29:c.G3140A:p.R1047H,DYSF:NM_001130978:exon29:c.G3137A:p.R1046H,DYSF:NM_001130980:exon29:c.G3188A:p.R1063H,DYSF:NM_001130981:exon29:c.G3188A:p.R1063H,DYSF:NM_001130983:exon29:c.G3140A:p.R1047H,DYSF:NM_0011…	0.002	pathogenic	0.026	pathogenic	1.0	pathogenic	1.0	pathogenic	2.91	pathogenic	1.0	pathogenic	-2.7	pathogenic
DYSF	21720	single nucleotide variant	NM_001130987.2(DYSF):c.991G>A (p.Gly331Arg)	8291	DYSF	HGNC:3097	Pathogenic	1	May 30, 2023	121908963	-	RCV000007068|RCV000726614|RCV001388966	MONDO:MONDO:0009676,MedGen:C1850889,OMIM:253601,Orphanet:268|MedGen:C3661900|MONDO:MONDO:0016145,MedGen:C2931687,Orphanet:207073	Autosomal recessive limb-girdle muscular dystrophy type 2B|not provided|Qualitative or quantitative defects of dysferlin	germline;unknown	germline	GRCh37	NC_000002.11	2	71744158	71744158	na	na	2p13.2	criteria provided, multiple submitters, no conflicts	6	-	N	ClinGen:CA253916,UniProtKB:O75923#VAR_057840,OMIM:603009.0017	3	6681	71744158	G	A	DYSF:NM_001130455:exon9:c.G898A:p.G300R,DYSF:NM_001130976:exon9:c.G895A:p.G299R,DYSF:NM_001130977:exon9:c.G895A:p.G299R,DYSF:NM_001130978:exon9:c.G895A:p.G299R,DYSF:NM_001130983:exon9:c.G898A:p.G300R,DYSF:NM_001130984:exon9:c.G898A:p.G300R,DYSF:NM_001130986:exon9:c.G898A:p.G300R,DYSF:NM_003494:exon9:c.G895A:p.G299R,DYSF:NM_001130979:exon10:c.G988A:p.G330R,DYSF:NM_001130980:exon10:c.G988A:p.G330R,…	0.001	pathogenic	0.002	pathogenic	1.0	pathogenic	1.0	pathogenic	3.355	pathogenic	1.0	pathogenic	-4.2	pathogenic
DYSF	21721	single nucleotide variant	NM_001130987.2(DYSF):c.991G>T (p.Gly331Trp)	8291	DYSF	HGNC:3097	Pathogenic/Likely pathogenic	1	Mar 31, 2023	121908963	-	RCV000007069|RCV000594920|RCV003159090	MONDO:MONDO:0024545,MedGen:C4551973,OMIM:254130,Orphanet:45448|MedGen:CN517202|MONDO:MONDO:0009676,MedGen:C1850889,OMIM:253601,Orphanet:268	Miyoshi muscular dystrophy 1|not provided|Autosomal recessive limb-girdle muscular dystrophy type 2B	germline	germline	GRCh37	NC_000002.11	2	71744158	71744158	na	na	2p13.2	criteria provided, multiple submitters, no conflicts	4	-	N	ClinGen:CA253918,UniProtKB:O75923#VAR_057841,OMIM:603009.0018	3	6682	71744158	G	T	DYSF:NM_001130455:exon9:c.G898T:p.G300W,DYSF:NM_001130976:exon9:c.G895T:p.G299W,DYSF:NM_001130977:exon9:c.G895T:p.G299W,DYSF:NM_001130978:exon9:c.G895T:p.G299W,DYSF:NM_001130983:exon9:c.G898T:p.G300W,DYSF:NM_001130984:exon9:c.G898T:p.G300W,DYSF:NM_001130986:exon9:c.G898T:p.G300W,DYSF:NM_003494:exon9:c.G895T:p.G299W,DYSF:NM_001130979:exon10:c.G988T:p.G330W,DYSF:NM_001130980:exon10:c.G988T:p.G330W,…	0.001	pathogenic	0.001	pathogenic	1.0	pathogenic	1.0	pathogenic	3.355	pathogenic	1.0	pathogenic	-4.2	pathogenic
NOG	21730	single nucleotide variant	NM_005450.6(NOG):c.665A>G (p.Tyr222Cys)	9241	NOG	HGNC:7866	Likely pathogenic	1	May 16, 2022	104894602	-	RCV000007079|RCV000007087|RCV002247256	MONDO:MONDO:0020733,MedGen:C3714899,OMIM:185800,Orphanet:3250|MONDO:MONDO:0008521,MedGen:C1861305,OMIM:186570,Orphanet:1412|MedGen:CN517202	Proximal symphalangism 1A|Tarsal-carpal coalition syndrome|not provided	germline	germline	GRCh37	NC_000017.10	17	54672249	54672249	na	na	17q22	criteria provided, single submitter	2	-	N	ClinGen:CA118425,UniProtKB:Q13253#VAR_011365,OMIM:602991.0001,OMIM:602991.0008	3	6691	54672249	A	G	NOG:NM_005450:exon1:c.A665G:p.Y222C	0.038	pathogenic	0.0	pathogenic	0.791	pathogenic	0.328	benign	3.2	pathogenic	0.96	pathogenic	-5.68	pathogenic
NOG	21736	single nucleotide variant	NM_005450.6(NOG):c.104C>G (p.Pro35Arg)	9241	NOG	HGNC:7866	Pathogenic	1	Nov 06, 2023	104894611	-	RCV000007085|RCV000049267|RCV002512863	MONDO:MONDO:0008521,MedGen:C1861305,OMIM:186570,Orphanet:1412|MONDO:MONDO:0020733,MedGen:C3714899,OMIM:185800,Orphanet:3250|MedGen:C3661900	Tarsal-carpal coalition syndrome|Proximal symphalangism 1A|not provided	germline	germline	GRCh37	NC_000017.10	17	54671688	54671688	na	na	17q22	criteria provided, multiple submitters, no conflicts	3	-	N	ClinGen:CA118431,UniProtKB:Q13253#VAR_011361,OMIM:602991.0007	3	6697	54671688	C	G	NOG:NM_005450:exon1:c.C104G:p.P35R	0.004	pathogenic	0.0	pathogenic	1.0	pathogenic	1.0	pathogenic	3.055	pathogenic	0.84	pathogenic	-5.48	pathogenic
BUB1B	21797	single nucleotide variant	NM_001211.6(BUB1B):c.119C>T (p.Thr40Met)	701	BUB1B	HGNC:1149	Benign/Likely benign	1	Nov 04, 2022	56079734	-	RCV000007150|RCV000120422|RCV000989284|RCV001594817|RCV002482837	MONDO:MONDO:0002032,MedGen:C0699790|MedGen:CN169374|MONDO:MONDO:0009759,MedGen:C1850343,OMIM:257300,Orphanet:1052|MedGen:CN517202|MONDO:MONDO:0005575,MedGen:C0346629,OMIM:114500;MONDO:MONDO:0008304,MedGen:C1864389,OMIM:176430;MONDO:MONDO:0009759,MedGen:C1850343,OMIM:257300,Orphanet:1052	Carcinoma of colon|not specified|Mosaic variegated aneuploidy syndrome 1|not provided|Colorectal cancer;Premature chromatid separation trait;Mosaic variegated aneuploidy syndrome 1	germline;somatic;unknown	germline/somatic	GRCh37	NC_000015.9	15	40457337	40457337	na	na	15q15.1	criteria provided, multiple submitters, no conflicts	7	-	N	ClinGen:CA157765,UniProtKB:O60566#VAR_040402,OMIM:602860.0001	3	6758	40457337	C	T	BUB1B:NM_001211:exon2:c.C119T:p.T40M	0.008	pathogenic	0.005	pathogenic	1.0	pathogenic	0.971	pathogenic	1.895	pathogenic	0.02	benign	2.44	benign
BUB1B	21803	single nucleotide variant	NM_001211.6(BUB1B):c.2441G>A (p.Arg814His)	701	BUB1B	HGNC:1149	Pathogenic/Likely pathogenic	1	May 14, 2022	28989182	-	RCV000007161|RCV000007160	MONDO:MONDO:0008304,MedGen:C1864389,OMIM:176430|MONDO:MONDO:0009759,MedGen:C1850343,OMIM:257300,Orphanet:1052	Premature chromatid separation trait|Mosaic variegated aneuploidy syndrome 1	germline;maternal	germline	GRCh37	NC_000015.9	15	40504755	40504755	na	na	15q15.1	criteria provided, multiple submitters, no conflicts	3	-	N	ClinGen:CA118494,UniProtKB:O60566#VAR_028924,OMIM:602860.0007	3	6764	40504755	G	A	BUB1B:NM_001211:exon19:c.G2441A:p.R814H	0.0	pathogenic	0.0	pathogenic	1.0	pathogenic	1.0	pathogenic	2.71	pathogenic	0.96	pathogenic	2.0	benign
BUB1B	21805	single nucleotide variant	NM_001211.6(BUB1B):c.1649G>A (p.Arg550Gln)	701	BUB1B	HGNC:1149	Benign/Likely benign	1	Nov 01, 2022	28989187	-	RCV000007164|RCV000007165	MONDO:MONDO:0009759,MedGen:C1850343,OMIM:257300,Orphanet:1052|MONDO:MONDO:0008304,MedGen:C1864389,OMIM:176430	Mosaic variegated aneuploidy syndrome 1|Premature chromatid separation trait	germline;unknown	germline	GRCh37	NC_000015.9	15	40494810	40494810	na	na	15q15.1	criteria provided, multiple submitters, no conflicts	3	-	N	ClinGen:CA118500,UniProtKB:O60566#VAR_028923,OMIM:602860.0009	3	6766	40494810	G	A	BUB1B:NM_001211:exon14:c.G1649A:p.R550Q	1.0	benign	0.587	benign	0.001	benign	0.001	benign	-1.095	benign	0.01	benign	2.6	benign
TUBB3	22002	single nucleotide variant	NM_006086.4(TUBB3):c.784C>T (p.Arg262Cys)	10381	TUBB3	HGNC:20772	Pathogenic	1	Jun 20, 2023	267607162	-	RCV000007378|RCV000254974	MONDO:MONDO:0010912,MedGen:C2748801,OMIM:600638|MedGen:C3661900	Fibrosis of extraocular muscles, congenital, 3A, with or without extraocular involvement|not provided	germline;maternal	germline	GRCh37	NC_000016.9	16	90001643	90001643	na	na	16q24.3	criteria provided, multiple submitters, no conflicts	6	-	N	ClinGen:CA340618,UniProtKB:Q13509#VAR_062759,OMIM:602661.0001	3	6963	90001643	C	T	TUBB3:NM_001197181:exon4:c.C568T:p.R190C,TUBB3:NM_006086:exon4:c.C784T:p.R262C	0.0	pathogenic	0.025	pathogenic	1.0	pathogenic	0.991	pathogenic	4.39	pathogenic	0.97	pathogenic	-1.9	pathogenic
TUBB3	22003	single nucleotide variant	NM_006086.4(TUBB3):c.904G>A (p.Ala302Thr)	10381	TUBB3	HGNC:20772	Pathogenic	1	Mar 22, 2022	267607163	-	RCV000007379|RCV000386199	MONDO:MONDO:0010912,MedGen:C2748801,OMIM:600638|MedGen:C3661900	Fibrosis of extraocular muscles, congenital, 3A, with or without extraocular involvement|not provided	germline	germline	GRCh37	NC_000016.9	16	90001763	90001763	na	na	16q24.3	criteria provided, multiple submitters, no conflicts	6	-	N	ClinGen:CA340620,UniProtKB:Q13509#VAR_062761,OMIM:602661.0002	3	6964	90001763	G	A	TUBB3:NM_001197181:exon4:c.G688A:p.A230T,TUBB3:NM_006086:exon4:c.G904A:p.A302T	0.0	pathogenic	0.016	pathogenic	0.989	pathogenic	0.932	pathogenic	3.155	pathogenic	0.9	pathogenic	-1.55	pathogenic
TUBB3	22005	single nucleotide variant	NM_006086.4(TUBB3):c.1249G>A (p.Asp417Asn)	10381	TUBB3	HGNC:20772	Pathogenic	1	Aug 14, 2021	267607164	-	RCV000007381|RCV001851720	MONDO:MONDO:0010912,MedGen:C2748801,OMIM:600638|MedGen:C3661900	Fibrosis of extraocular muscles, congenital, 3A, with or without extraocular involvement|not provided	germline	germline	GRCh37	NC_000016.9	16	90002108	90002108	na	na	16q24.3	criteria provided, single submitter	3	-	N	ClinGen:CA340624,UniProtKB:Q13509#VAR_062765,OMIM:602661.0004	3	6966	90002108	G	A	TUBB3:NM_001197181:exon4:c.G1033A:p.D345N,TUBB3:NM_006086:exon4:c.G1249A:p.D417N	0.001	pathogenic	0.016	pathogenic	1.0	pathogenic	0.905	pathogenic	1.835	pathogenic	0.95	pathogenic	-0.69	benign
TUBB3	22006	single nucleotide variant	NM_006086.4(TUBB3):c.1228G>A (p.Glu410Lys)	10381	TUBB3	HGNC:20772	Pathogenic	1	May 10, 2023	267607165	-	RCV000007382|RCV000194090|RCV001267650|RCV001539529|RCV003398458	MONDO:MONDO:0010912,MedGen:C2748801,OMIM:600638|MONDO:MONDO:0013541,MedGen:C3808397,OMIM:614039,Orphanet:300570||MedGen:C3661900|	Fibrosis of extraocular muscles, congenital, 3A, with or without extraocular involvement|Complex cortical dysplasia with other brain malformations 1|TUBB3-Releated Disorders|not provided|TUBB3-related condition	de novo;germline;unknown	germline	GRCh37	NC_000016.9	16	90002087	90002087	na	na	16q24.3	criteria provided, multiple submitters, no conflicts	8	-	N	ClinGen:CA213335,UniProtKB:Q13509#VAR_062763,OMIM:602661.0005	3	6967	90002087	G	A	TUBB3:NM_001197181:exon4:c.G1012A:p.E338K,TUBB3:NM_006086:exon4:c.G1228A:p.E410K	0.002	pathogenic	0.004	pathogenic	0.909	pathogenic	0.14	benign	3.14	pathogenic	0.98	pathogenic	-2.35	pathogenic
CFTR	22147	single nucleotide variant	NM_000492.4(CFTR):c.328G>C (p.Asp110His)	1080	CFTR	HGNC:1884	Pathogenic; drug response	1	Mar 24, 2021	113993958	-	RCV000007527|RCV000058930|RCV000660769|RCV000780153|RCV001009392|RCV001004427|RCV001835624|RCV002247259	MONDO:MONDO:0009061,MedGen:C0010674,OMIM:219700,Orphanet:586|MedGen:CN517202|MedGen:CN322735|MedGen:CN169374|MONDO:MONDO:0009061,MedGen:C0010674,OMIM:219700,Orphanet:586;|MONDO:MONDO:0009061,MedGen:C0010674,OMIM:219700,Orphanet:586;MONDO:MONDO:0010178,MedGen:C0403814,OMIM:277180,Orphanet:48||MONDO:MONDO:0008185,MedGen:C0238339,OMIM:167800,Orphanet:676	Cystic fibrosis|not provided|ivacaftor response - Efficacy|not specified|Cystic fibrosis;CFTR-related disorders|Cystic fibrosis;Congenital bilateral aplasia of vas deferens from CFTR mutation|CFTR-related disorders|Hereditary pancreatitis	germline;unknown	germline	GRCh37	NC_000007.13	7	117171007	117171007	na	na	7q31.2	reviewed by expert panel	16	-	N	ClinGen:CA284835,UniProtKB:P13569#VAR_000119,OMIM:602421.0004	3	7108	117171007	G	C	CFTR:NM_000492:exon4:c.G328C:p.D110H	0.002	pathogenic	0.0	pathogenic	0.999	pathogenic	0.988	pathogenic	2.095	pathogenic	0.99	pathogenic	-6.89	pathogenic
CFTR	22148	single nucleotide variant	NM_000492.4(CFTR):c.350G>A (p.Arg117His)	1080	CFTR	HGNC:1884	Pathogenic	1	Mar 03, 2004	78655421	-	RCV000007529|RCV000007528|RCV000078997|RCV000417156|RCV000763151|RCV000826137|RCV001009478|RCV001642199	MONDO:MONDO:0010178,MedGen:C0403814,OMIM:277180,Orphanet:48|MONDO:MONDO:0009061,MedGen:C0010674,OMIM:219700,Orphanet:586|MedGen:C3661900|MedGen:CN322735|MONDO:MONDO:0010178,MedGen:C0403814,OMIM:277180,Orphanet:48;MONDO:MONDO:0008185,MedGen:C0238339,OMIM:167800,Orphanet:676;MONDO:MONDO:0009061,MedGen:C0010674,OMIM:219700,Orphanet:586;MONDO:MONDO:0008887,MedGen:C2749757,OMIM:211400,Orphanet:60033|M…	Congenital bilateral aplasia of vas deferens from CFTR mutation|Cystic fibrosis|not provided|ivacaftor response - Efficacy|Congenital bilateral aplasia of vas deferens from CFTR mutation;Hereditary pancreatitis;Cystic fibrosis;Bronchiectasis with or without elevated sweat chloride 1|Congenital bilateral aplasia of vas deferens from CFTR mutation;Cystic fibrosis|CFTR-related disorders|Obstructive …	germline;maternal;paternal;unknown	germline	GRCh37	NC_000007.13	7	117171029	117171029	na	na	7q31.2	practice guideline	36	-	Y	ClinGen:CA221026,UniProtKB:P13569#VAR_000122,OMIM:602421.0005,ClinVar:209047	3	7109	117171029	G	A	CFTR:NM_000492:exon4:c.G350A:p.R117H	0.0	pathogenic	0.0	pathogenic	1.0	pathogenic	1.0	pathogenic	2.075	pathogenic	0.7	pathogenic	-6.83	pathogenic
CFTR	22149	single nucleotide variant	NM_000492.4(CFTR):c.1040G>C (p.Arg347Pro)	1080	CFTR	HGNC:1884	Pathogenic	1	Mar 03, 2004	77932196	-	RCV000007530|RCV001004251|RCV001530124|RCV001831520|RCV002504761	MONDO:MONDO:0009061,MedGen:C0010674,OMIM:219700,Orphanet:586|MONDO:MONDO:0010178,MedGen:C0403814,OMIM:277180,Orphanet:48;MONDO:MONDO:0009061,MedGen:C0010674,OMIM:219700,Orphanet:586|MedGen:C3661900||MONDO:MONDO:0010178,MedGen:C0403814,OMIM:277180,Orphanet:48;MONDO:MONDO:0008185,MedGen:C0238339,OMIM:167800,Orphanet:676;MONDO:MONDO:0009061,MedGen:C0010674,OMIM:219700,Orphanet:586;MONDO:MONDO:000888…	Cystic fibrosis|Congenital bilateral aplasia of vas deferens from CFTR mutation;Cystic fibrosis|not provided|CFTR-related disorders|Congenital bilateral aplasia of vas deferens from CFTR mutation;Hereditary pancreatitis;Cystic fibrosis;Bronchiectasis with or without elevated sweat chloride 1	germline;unknown	germline	GRCh37	NC_000007.13	7	117180324	117180324	na	na	7q31.2	practice guideline	19	-	Y	ClinGen:CA340630,UniProtKB:P13569#VAR_000155,OMIM:602421.0006	3	7110	117180324	G	C	CFTR:NM_000492:exon8:c.G1040C:p.R347P	0.062	benign	0.0	pathogenic	1.0	pathogenic	1.0	pathogenic	2.93	pathogenic	0.99	pathogenic	-2.87	pathogenic
CFTR	22150	single nucleotide variant	NM_000492.4(CFTR):c.1364C>A (p.Ala455Glu)	1080	CFTR	HGNC:1884	Pathogenic	1	Mar 03, 2004	74551128	-	RCV000007531|RCV000660853|RCV000763569|RCV001004446|RCV001530091|RCV001826427	MONDO:MONDO:0009061,MedGen:C0010674,OMIM:219700,Orphanet:586|MedGen:CN322735|MONDO:MONDO:0010178,MedGen:C0403814,OMIM:277180,Orphanet:48;MONDO:MONDO:0008185,MedGen:C0238339,OMIM:167800,Orphanet:676;MONDO:MONDO:0008887,MedGen:C2749757,OMIM:211400,Orphanet:60033;MONDO:MONDO:0009061,MedGen:C0010674,OMIM:219700,Orphanet:586|MONDO:MONDO:0010178,MedGen:C0403814,OMIM:277180,Orphanet:48;MONDO:MONDO:00090…	Cystic fibrosis|ivacaftor response - Efficacy|Congenital bilateral aplasia of vas deferens from CFTR mutation;Hereditary pancreatitis;Bronchiectasis with or without elevated sweat chloride 1;Cystic fibrosis|Congenital bilateral aplasia of vas deferens from CFTR mutation;Cystic fibrosis|not provided|CFTR-related disorders	germline;unknown	germline	GRCh37	NC_000007.13	7	117188849	117188849	na	na	7q31.2	practice guideline	21	-	Y	ClinGen:CA340631,UniProtKB:P13569#VAR_000160,OMIM:602421.0007	3	7111	117188849	C	A	CFTR:NM_000492:exon10:c.C1364A:p.A455E	0.003	pathogenic	0.001	pathogenic	1.0	pathogenic	0.99	pathogenic	3.565	pathogenic	0.94	pathogenic	-3.33	pathogenic
CFTR	22152	single nucleotide variant	NM_000492.4(CFTR):c.1679G>C (p.Arg560Thr)	1080	CFTR	HGNC:1884	Pathogenic	1	Mar 03, 2004	80055610	-	RCV000007533|RCV000224789|RCV000780134|RCV001004262|RCV001831521|RCV002504762|RCV003407293	MONDO:MONDO:0009061,MedGen:C0010674,OMIM:219700,Orphanet:586|MedGen:C3661900|MedGen:CN169374|MONDO:MONDO:0010178,MedGen:C0403814,OMIM:277180,Orphanet:48;MONDO:MONDO:0009061,MedGen:C0010674,OMIM:219700,Orphanet:586||MONDO:MONDO:0010178,MedGen:C0403814,OMIM:277180,Orphanet:48;MONDO:MONDO:0008185,MedGen:C0238339,OMIM:167800,Orphanet:676;MONDO:MONDO:0009061,MedGen:C0010674,OMIM:219700,Orphanet:586;MO…	Cystic fibrosis|not provided|not specified|Congenital bilateral aplasia of vas deferens from CFTR mutation;Cystic fibrosis|CFTR-related disorders|Congenital bilateral aplasia of vas deferens from CFTR mutation;Hereditary pancreatitis;Cystic fibrosis;Bronchiectasis with or without elevated sweat chloride 1|CFTR-related condition	germline;unknown	germline	GRCh37	NC_000007.13	7	117227887	117227887	na	na	7q31.2	practice guideline	19	-	Y	ClinGen:CA340633,UniProtKB:P13569#VAR_000186,OMIM:602421.0016	3	7113	117227887	G	C	CFTR:NM_000492:exon12:c.G1679C:p.R560T	0.0	pathogenic	0.005	pathogenic	1.0	pathogenic	1.0	pathogenic	3.605	pathogenic	1.0	pathogenic	-3.71	pathogenic
CFTR	22153	single nucleotide variant	NM_000492.4(CFTR):c.1687T>A (p.Tyr563Asn)	1080	CFTR	HGNC:1884	Pathogenic	1	Dec 08, 2017	121909006	-	RCV000007534|RCV001004266|RCV001009533|RCV002254258	MONDO:MONDO:0009061,MedGen:C0010674,OMIM:219700,Orphanet:586|MONDO:MONDO:0010178,MedGen:C0403814,OMIM:277180,Orphanet:48;MONDO:MONDO:0009061,MedGen:C0010674,OMIM:219700,Orphanet:586|;MONDO:MONDO:0009061,MedGen:C0010674,OMIM:219700,Orphanet:586|MedGen:CN517202	Cystic fibrosis|Congenital bilateral aplasia of vas deferens from CFTR mutation;Cystic fibrosis|CFTR-related disorders;Cystic fibrosis|not provided	germline;unknown	germline	GRCh37	NC_000007.13	7	117230414	117230414	na	na	7q31.2	reviewed by expert panel	10	-	N	ClinGen:CA325520,UniProtKB:P13569#VAR_000189,OMIM:602421.0017	3	7114	117230414	T	A	CFTR:NM_000492:exon13:c.T1687A:p.Y563N	0.0	pathogenic	0.005	pathogenic	1.0	pathogenic	1.0	pathogenic	2.86	pathogenic	0.98	pathogenic	-3.28	pathogenic
CFTR	22155	single nucleotide variant	NM_000492.4(CFTR):c.1646G>A (p.Ser549Asn)	1080	CFTR	HGNC:1884	Pathogenic; drug response	1	Mar 24, 2021	121908755	-	RCV000007536|RCV000211264|RCV000727629|RCV001004465|RCV001831522|RCV002247260|RCV002496296|RCV003421910	MONDO:MONDO:0009061,MedGen:C0010674,OMIM:219700,Orphanet:586|MedGen:CN322735|MedGen:C3661900|MONDO:MONDO:0010178,MedGen:C0403814,OMIM:277180,Orphanet:48;MONDO:MONDO:0009061,MedGen:C0010674,OMIM:219700,Orphanet:586||MONDO:MONDO:0008185,MedGen:C0238339,OMIM:167800,Orphanet:676|MONDO:MONDO:0010178,MedGen:C0403814,OMIM:277180,Orphanet:48;MONDO:MONDO:0008185,MedGen:C0238339,OMIM:167800,Orphanet:676;MO…	Cystic fibrosis|ivacaftor response - Efficacy|not provided|Congenital bilateral aplasia of vas deferens from CFTR mutation;Cystic fibrosis|CFTR-related disorders|Hereditary pancreatitis|Congenital bilateral aplasia of vas deferens from CFTR mutation;Hereditary pancreatitis;Cystic fibrosis;Bronchiectasis with or without elevated sweat chloride 1|CFTR-related condition	germline;unknown	germline	GRCh37	NC_000007.13	7	117227854	117227854	na	na	7q31.2	reviewed by expert panel	23	-	Y	PharmGKB Clinical Annotation:1183960318,ClinGen:CA325521,UniProtKB:P13569#VAR_000176,OMIM:602421.0010	3	7116	117227854	G	A	CFTR:NM_000492:exon12:c.G1646A:p.S549N	0.0	pathogenic	0.0	pathogenic	1.0	pathogenic	0.999	pathogenic	4.735	pathogenic	0.87	pathogenic	-5.18	pathogenic
CFTR	22157	single nucleotide variant	NM_000492.4(CFTR):c.1647T>G (p.Ser549Arg)	1080	CFTR	HGNC:1884	Pathogenic; drug response	1	Mar 24, 2021	121909005	-	RCV000056350|RCV000211129|RCV000508411|RCV000763573|RCV001004466|RCV001826538	MONDO:MONDO:0009061,MedGen:C0010674,OMIM:219700,Orphanet:586|MedGen:CN322735|MedGen:C3661900|MONDO:MONDO:0008887,MedGen:C2749757,OMIM:211400,Orphanet:60033;MONDO:MONDO:0010178,MedGen:C0403814,OMIM:277180,Orphanet:48;MONDO:MONDO:0009061,MedGen:C0010674,OMIM:219700,Orphanet:586;MONDO:MONDO:0008185,MedGen:C0238339,OMIM:167800,Orphanet:676|MONDO:MONDO:0010178,MedGen:C0403814,OMIM:277180,Orphanet:48;M…	Cystic fibrosis|ivacaftor response - Efficacy|not provided|Bronchiectasis with or without elevated sweat chloride 1;Congenital bilateral aplasia of vas deferens from CFTR mutation;Cystic fibrosis;Hereditary pancreatitis|Congenital bilateral aplasia of vas deferens from CFTR mutation;Cystic fibrosis|CFTR-related disorders	germline;unknown	germline	GRCh37	NC_000007.13	7	117227855	117227855	na	na	7q31.2	reviewed by expert panel	17	-	Y	UniProtKB:P13569#VAR_000178,OMIM:602421.0012,PharmGKB Clinical Annotation:1183960775,ClinGen:CA254107	3	40190	117227855	T	G	CFTR:NM_000492:exon12:c.T1647G:p.S549R	0.0	pathogenic	0.0	pathogenic	1.0	pathogenic	1.0	pathogenic	5.085	pathogenic	0.98	pathogenic	-5.18	pathogenic
CFTR	22158	single nucleotide variant	NM_000492.4(CFTR):c.1721C>A (p.Pro574His)	1080	CFTR	HGNC:1884	Pathogenic	1	Dec 08, 2017	121908758	-	RCV000007539|RCV001004269|RCV001009367|RCV001831523|RCV002254259|RCV002490333	MONDO:MONDO:0009061,MedGen:C0010674,OMIM:219700,Orphanet:586|MONDO:MONDO:0010178,MedGen:C0403814,OMIM:277180,Orphanet:48;MONDO:MONDO:0009061,MedGen:C0010674,OMIM:219700,Orphanet:586|;MONDO:MONDO:0009061,MedGen:C0010674,OMIM:219700,Orphanet:586||MedGen:CN517202|MONDO:MONDO:0008185,MedGen:C0238339,OMIM:167800,Orphanet:676;MONDO:MONDO:0008887,MedGen:C2749757,OMIM:211400,Orphanet:60033;MONDO:MONDO:00…	Cystic fibrosis|Congenital bilateral aplasia of vas deferens from CFTR mutation;Cystic fibrosis|CFTR-related disorders;Cystic fibrosis|CFTR-related disorders|not provided|Hereditary pancreatitis;Bronchiectasis with or without elevated sweat chloride 1;Congenital bilateral aplasia of vas deferens from CFTR mutation;Cystic fibrosis	germline;unknown	germline	GRCh37	NC_000007.13	7	117230448	117230448	na	na	7q31.2	reviewed by expert panel	11	-	N	ClinGen:CA325523,UniProtKB:P13569#VAR_000195,OMIM:602421.0018	3	7119	117230448	C	A	CFTR:NM_000492:exon13:c.C1721A:p.P574H	0.002	pathogenic	0.0	pathogenic	1.0	pathogenic	1.0	pathogenic	3.66	pathogenic	0.98	pathogenic	-4.09	pathogenic
CFTR	22159	single nucleotide variant	NM_000492.4(CFTR):c.1652G>A (p.Gly551Asp)	1080	CFTR	HGNC:1884	Pathogenic	1	Mar 03, 2004	75527207	-	RCV000007540|RCV000119040|RCV000211289|RCV000301838|RCV000763574|RCV001004467|RCV001831524|RCV003415670	MONDO:MONDO:0009061,MedGen:C0010674,OMIM:219700,Orphanet:586|MONDO:MONDO:0008185,MedGen:C0238339,OMIM:167800,Orphanet:676|MedGen:CN322735|MedGen:C3661900|MONDO:MONDO:0010178,MedGen:C0403814,OMIM:277180,Orphanet:48;MONDO:MONDO:0008185,MedGen:C0238339,OMIM:167800,Orphanet:676;MONDO:MONDO:0009061,MedGen:C0010674,OMIM:219700,Orphanet:586;MONDO:MONDO:0008887,MedGen:C2749757,OMIM:211400,Orphanet:60033|…	Cystic fibrosis|Hereditary pancreatitis|ivacaftor response - Efficacy|not provided|Congenital bilateral aplasia of vas deferens from CFTR mutation;Hereditary pancreatitis;Cystic fibrosis;Bronchiectasis with or without elevated sweat chloride 1|Congenital bilateral aplasia of vas deferens from CFTR mutation;Cystic fibrosis|CFTR-related disorders|CFTR-related condition	germline;maternal;unknown	germline	GRCh37	NC_000007.13	7	117227860	117227860	na	na	7q31.2	practice guideline	28	-	Y	PharmGKB Clinical Annotation:981755803,ClinGen:CA340634,UniProtKB:P13569#VAR_000179,OMIM:602421.0013	3	7120	117227860	G	A	CFTR:NM_000492:exon12:c.G1652A:p.G551D	0.0	pathogenic	0.0	pathogenic	1.0	pathogenic	1.0	pathogenic	4.255	pathogenic	1.0	pathogenic	-5.8	pathogenic
CFTR	22162	single nucleotide variant	NM_000492.4(CFTR):c.1675G>A (p.Ala559Thr)	1080	CFTR	HGNC:1884	Pathogenic	1	Mar 17, 2017	75549581	-	RCV000007543|RCV000521321|RCV001004261|RCV001826429|RCV002476941|RCV003415672	MONDO:MONDO:0009061,MedGen:C0010674,OMIM:219700,Orphanet:586|MedGen:C3661900|MONDO:MONDO:0010178,MedGen:C0403814,OMIM:277180,Orphanet:48;MONDO:MONDO:0009061,MedGen:C0010674,OMIM:219700,Orphanet:586||MONDO:MONDO:0008887,MedGen:C2749757,OMIM:211400,Orphanet:60033;MONDO:MONDO:0010178,MedGen:C0403814,OMIM:277180,Orphanet:48;MONDO:MONDO:0008185,MedGen:C0238339,OMIM:167800,Orphanet:676;MONDO:MONDO:0009…	Cystic fibrosis|not provided|Congenital bilateral aplasia of vas deferens from CFTR mutation;Cystic fibrosis|CFTR-related disorders|Bronchiectasis with or without elevated sweat chloride 1;Congenital bilateral aplasia of vas deferens from CFTR mutation;Hereditary pancreatitis;Cystic fibrosis|CFTR-related condition	germline;unknown	germline	GRCh37	NC_000007.13	7	117227883	117227883	na	na	7q31.2	reviewed by expert panel	16	-	Y	ClinGen:CA340637,UniProtKB:P13569#VAR_000183,OMIM:602421.0015	3	7123	117227883	G	A	CFTR:NM_000492:exon12:c.G1675A:p.A559T	0.0	pathogenic	0.008	pathogenic	1.0	pathogenic	1.0	pathogenic	3.47	pathogenic	0.99	pathogenic	-3.92	pathogenic
CFTR	22167	single nucleotide variant	NM_000492.4(CFTR):c.2738A>G (p.Tyr913Cys)	1080	CFTR	HGNC:1884	Pathogenic/Likely pathogenic	1	Sep 05, 2022	121909008	-	RCV000007548|RCV001004485	MONDO:MONDO:0009061,MedGen:C0010674,OMIM:219700,Orphanet:586|MONDO:MONDO:0010178,MedGen:C0403814,OMIM:277180,Orphanet:48;MONDO:MONDO:0009061,MedGen:C0010674,OMIM:219700,Orphanet:586	Cystic fibrosis|Congenital bilateral aplasia of vas deferens from CFTR mutation;Cystic fibrosis	germline;unknown	germline	GRCh37	NC_000007.13	7	117243666	117243666	na	na	7q31.2	criteria provided, multiple submitters, no conflicts	6	-	N	ClinGen:CA325529,UniProtKB:P13569#VAR_000223,OMIM:602421.0027	3	7128	117243666	A	G	CFTR:NM_000492:exon17:c.A2738G:p.Y913C	0.001	pathogenic	0.0	pathogenic	0.992	pathogenic	0.949	pathogenic	2.78	pathogenic	0.92	pathogenic	-3.49	pathogenic
CFTR	22169	single nucleotide variant	NM_000492.4(CFTR):c.1408G>A (p.Val470Met)	1080	CFTR	HGNC:1884	Benign/Likely benign	0	Nov 30, 2022	213950	-	RCV000007550|RCV000036517|RCV001095216|RCV001810835	MONDO:MONDO:0009061,MedGen:C0010674,OMIM:219700,Orphanet:586|MedGen:CN169374||MedGen:C3661900	Cystic fibrosis|not specified|CFTR-related disorders|not provided	germline	germline	GRCh37	NC_000007.13	7	117199533	117199533	na	na	7q31.2	criteria provided, multiple submitters, no conflicts	19	-	N	ClinGen:CA132747,UniProtKB:P13569#VAR_000164,OMIM:602421.0023	3	7130	117199533	G	A	CFTR:NM_000492:exon11:c.G1408A:p.V470M	-	-	-	-	-	-	-	-	-	-	-	-	-3.39	pathogenic
CFTR	22175	single nucleotide variant	NM_000492.4(CFTR):c.3909C>G (p.Asn1303Lys)	1080	CFTR	HGNC:1884	Pathogenic	1	Mar 03, 2004	80034486	-	RCV000007556|RCV000224445|RCV001004513|RCV001831530|RCV002255995|RCV002287325	MONDO:MONDO:0009061,MedGen:C0010674,OMIM:219700,Orphanet:586|MedGen:C3661900|MONDO:MONDO:0010178,MedGen:C0403814,OMIM:277180,Orphanet:48;MONDO:MONDO:0009061,MedGen:C0010674,OMIM:219700,Orphanet:586||MONDO:MONDO:0008185,MedGen:C0238339,OMIM:167800,Orphanet:676|MONDO:MONDO:0010767,MedGen:C1839071,OMIM:415000,Orphanet:1646	Cystic fibrosis|not provided|Congenital bilateral aplasia of vas deferens from CFTR mutation;Cystic fibrosis|CFTR-related disorders|Hereditary pancreatitis|Spermatogenic failure, Y-linked, 2	germline;inherited;unknown	germline	GRCh37	NC_000007.13	7	117292931	117292931	na	na	7q31.2	practice guideline	35	-	Y	ClinGen:CA340641,UniProtKB:P13569#VAR_000267,OMIM:602421.0032	3	7136	117292931	C	G	CFTR:NM_000492:exon24:c.C3909G:p.N1303K	0.0	pathogenic	0.003	pathogenic	1.0	pathogenic	1.0	pathogenic	3.88	pathogenic	0.83	pathogenic	-3.45	pathogenic
CFTR	22178	single nucleotide variant	NM_000492.4(CFTR):c.1000C>T (p.Arg334Trp)	1080	CFTR	HGNC:1884	Pathogenic	1	Mar 03, 2004	121909011	-	RCV000007559|RCV000224060|RCV000763567|RCV001000033|RCV001004246|RCV001826431|RCV003407295	MONDO:MONDO:0009061,MedGen:C0010674,OMIM:219700,Orphanet:586|MedGen:C3661900|MONDO:MONDO:0008887,MedGen:C2749757,OMIM:211400,Orphanet:60033;MONDO:MONDO:0010178,MedGen:C0403814,OMIM:277180,Orphanet:48;MONDO:MONDO:0008185,MedGen:C0238339,OMIM:167800,Orphanet:676;MONDO:MONDO:0009061,MedGen:C0010674,OMIM:219700,Orphanet:586|MedGen:CN169374|MONDO:MONDO:0010178,MedGen:C0403814,OMIM:277180,Orphanet:48;M…	Cystic fibrosis|not provided|Bronchiectasis with or without elevated sweat chloride 1;Congenital bilateral aplasia of vas deferens from CFTR mutation;Hereditary pancreatitis;Cystic fibrosis|not specified|Congenital bilateral aplasia of vas deferens from CFTR mutation;Cystic fibrosis|CFTR-related disorders|CFTR-related condition	germline;inherited;unknown	germline	GRCh37	NC_000007.13	7	117180284	117180284	na	na	7q31.2	practice guideline	27	-	Y	ClinGen:CA340644,UniProtKB:P13569#VAR_000148,OMIM:602421.0034	3	7139	117180284	C	T	CFTR:NM_000492:exon8:c.C1000T:p.R334W	0.005	pathogenic	0.0	pathogenic	1.0	pathogenic	1.0	pathogenic	2.075	pathogenic	0.84	pathogenic	-2.56	pathogenic
CFTR	22181	single nucleotide variant	NM_000492.4(CFTR):c.1651G>A (p.Gly551Ser)	1080	CFTR	HGNC:1884	Pathogenic; drug response	1	Mar 24, 2021	121909013	-	RCV000007562|RCV000211256|RCV000224595|RCV001831533|RCV002247261	MONDO:MONDO:0009061,MedGen:C0010674,OMIM:219700,Orphanet:586|MedGen:CN322735|MedGen:CN517202||MONDO:MONDO:0008185,MedGen:C0238339,OMIM:167800,Orphanet:676	Cystic fibrosis|ivacaftor response - Efficacy|not provided|CFTR-related disorders|Hereditary pancreatitis	germline;unknown	germline	GRCh37	NC_000007.13	7	117227859	117227859	na	na	7q31.2	reviewed by expert panel	12	-	N	PharmGKB Clinical Annotation:1183960780,ClinGen:CA325536,UniProtKB:P13569#VAR_000180,OMIM:602421.0037	3	7142	117227859	G	A	CFTR:NM_000492:exon12:c.G1651A:p.G551S	0.0	pathogenic	0.0	pathogenic	0.999	pathogenic	0.999	pathogenic	3.675	pathogenic	0.99	pathogenic	-5.77	pathogenic
CFTR	22182	single nucleotide variant	NM_000492.4(CFTR):c.254G>A (p.Gly85Glu)	1080	CFTR	HGNC:1884	Pathogenic	1	Mar 03, 2004	75961395	-	RCV000007563|RCV000224170|RCV001004234|RCV001831534|RCV002490334	MONDO:MONDO:0009061,MedGen:C0010674,OMIM:219700,Orphanet:586|MedGen:C3661900|MONDO:MONDO:0010178,MedGen:C0403814,OMIM:277180,Orphanet:48;MONDO:MONDO:0009061,MedGen:C0010674,OMIM:219700,Orphanet:586||MONDO:MONDO:0010178,MedGen:C0403814,OMIM:277180,Orphanet:48;MONDO:MONDO:0008185,MedGen:C0238339,OMIM:167800,Orphanet:676;MONDO:MONDO:0009061,MedGen:C0010674,OMIM:219700,Orphanet:586;MONDO:MONDO:000888…	Cystic fibrosis|not provided|Congenital bilateral aplasia of vas deferens from CFTR mutation;Cystic fibrosis|CFTR-related disorders|Congenital bilateral aplasia of vas deferens from CFTR mutation;Hereditary pancreatitis;Cystic fibrosis;Bronchiectasis with or without elevated sweat chloride 1	de novo;germline;unknown	germline	GRCh37	NC_000007.13	7	117149177	117149177	na	na	7q31.2	practice guideline	22	-	Y	ClinGen:CA340647,UniProtKB:P13569#VAR_000112,OMIM:602421.0038	3	7143	117149177	G	A	CFTR:NM_000492:exon3:c.G254A:p.G85E	0.0	pathogenic	0.0	pathogenic	0.995	pathogenic	0.973	pathogenic	3.015	pathogenic	1.0	pathogenic	-7.43	pathogenic
CFTR	22189	single nucleotide variant	NM_000492.4(CFTR):c.1558G>T (p.Val520Phe)	1080	CFTR	HGNC:1884	Pathogenic	1	Mar 17, 2017	77646904	-	RCV000007570|RCV000781233|RCV001004460|RCV001528232|RCV001826436|RCV003415674	MONDO:MONDO:0009061,MedGen:C0010674,OMIM:219700,Orphanet:586|MedGen:CN169374|MONDO:MONDO:0010178,MedGen:C0403814,OMIM:277180,Orphanet:48;MONDO:MONDO:0009061,MedGen:C0010674,OMIM:219700,Orphanet:586|MedGen:C3661900||	Cystic fibrosis|not specified|Congenital bilateral aplasia of vas deferens from CFTR mutation;Cystic fibrosis|not provided|CFTR-related disorders|CFTR-related condition	germline;unknown	germline	GRCh37	NC_000007.13	7	117199683	117199683	na	na	7q31.2	reviewed by expert panel	12	-	Y	ClinGen:CA325545,UniProtKB:P13569#VAR_000174,OMIM:602421.0046	3	7150	117199683	G	T	CFTR:NM_000492:exon11:c.G1558T:p.V520F	0.001	pathogenic	0.005	pathogenic	1.0	pathogenic	0.992	pathogenic	2.34	pathogenic	0.97	pathogenic	-2.81	pathogenic
CFTR	22192	single nucleotide variant	NM_000492.4(CFTR):c.933C>G (p.Phe311Leu)	1080	CFTR	HGNC:1884	Pathogenic	1	Dec 08, 2017	121909016	-	RCV000007573|RCV001642201	MONDO:MONDO:0009061,MedGen:C0010674,OMIM:219700,Orphanet:586|Human Phenotype Ontology:HP:0011962,MedGen:C4023106	Cystic fibrosis|Obstructive azoospermia	germline	germline	GRCh37	NC_000007.13	7	117180217	117180217	na	na	7q31.2	reviewed by expert panel	6	-	N	ClinGen:CA325549,UniProtKB:P13569#VAR_000144,OMIM:602421.0049	3	7153	117180217	C	G	CFTR:NM_000492:exon8:c.C933G:p.F311L	0.11	benign	0.0	pathogenic	0.747	pathogenic	0.863	pathogenic	2.295	pathogenic	0.98	pathogenic	-2.44	pathogenic
CFTR	22194	single nucleotide variant	NM_000492.4(CFTR):c.1475C>T (p.Ser492Phe)	1080	CFTR	HGNC:1884	Pathogenic	1	Mar 17, 2017	121909017	-	RCV000007575|RCV000763571|RCV001004455|RCV001810836	MONDO:MONDO:0009061,MedGen:C0010674,OMIM:219700,Orphanet:586|MONDO:MONDO:0010178,MedGen:C0403814,OMIM:277180,Orphanet:48;MONDO:MONDO:0008185,MedGen:C0238339,OMIM:167800,Orphanet:676;MONDO:MONDO:0009061,MedGen:C0010674,OMIM:219700,Orphanet:586;MONDO:MONDO:0008887,MedGen:C2749757,OMIM:211400,Orphanet:60033|MONDO:MONDO:0010178,MedGen:C0403814,OMIM:277180,Orphanet:48;MONDO:MONDO:0009061,MedGen:C00106…	Cystic fibrosis|Congenital bilateral aplasia of vas deferens from CFTR mutation;Hereditary pancreatitis;Cystic fibrosis;Bronchiectasis with or without elevated sweat chloride 1|Congenital bilateral aplasia of vas deferens from CFTR mutation;Cystic fibrosis|not provided	germline;unknown	germline	GRCh37	NC_000007.13	7	117199600	117199600	na	na	7q31.2	reviewed by expert panel	12	-	N	ClinGen:CA325551,UniProtKB:P13569#VAR_000166,OMIM:602421.0051	3	7155	117199600	C	T	CFTR:NM_000492:exon11:c.C1475T:p.S492F	0.019	pathogenic	0.09	benign	0.993	pathogenic	0.951	pathogenic	0.755	benign	0.91	pathogenic	-3.25	pathogenic
CFTR	22195	single nucleotide variant	NM_000492.4(CFTR):c.1679G>A (p.Arg560Lys)	1080	CFTR	HGNC:1884	Pathogenic	1	Mar 17, 2017	80055610	-	RCV000007576	MONDO:MONDO:0009061,MedGen:C0010674,OMIM:219700,Orphanet:586	Cystic fibrosis	germline;unknown	germline	GRCh37	NC_000007.13	7	117227887	117227887	na	na	7q31.2	reviewed by expert panel	7	-	N	ClinGen:CA325552,UniProtKB:P13569#VAR_000184,OMIM:602421.0052	3	7156	117227887	G	A	CFTR:NM_000492:exon12:c.G1679A:p.R560K	0.0	pathogenic	0.012	pathogenic	1.0	pathogenic	0.999	pathogenic	3.08	pathogenic	0.97	pathogenic	-3.55	pathogenic
CFTR	22197	single nucleotide variant	NM_000492.4(CFTR):c.3197G>A (p.Arg1066His)	1080	CFTR	HGNC:1884	Pathogenic	1	Mar 17, 2017	121909019	-	RCV000007578|RCV000506781|RCV000592350|RCV001004299|RCV001831538|RCV002496297	MONDO:MONDO:0009061,MedGen:C0010674,OMIM:219700,Orphanet:586|MedGen:CN169374|MedGen:C3661900|MONDO:MONDO:0010178,MedGen:C0403814,OMIM:277180,Orphanet:48;MONDO:MONDO:0009061,MedGen:C0010674,OMIM:219700,Orphanet:586||MONDO:MONDO:0010178,MedGen:C0403814,OMIM:277180,Orphanet:48;MONDO:MONDO:0008185,MedGen:C0238339,OMIM:167800,Orphanet:676;MONDO:MONDO:0009061,MedGen:C0010674,OMIM:219700,Orphanet:586;MO…	Cystic fibrosis|not specified|not provided|Congenital bilateral aplasia of vas deferens from CFTR mutation;Cystic fibrosis|CFTR-related disorders|Congenital bilateral aplasia of vas deferens from CFTR mutation;Hereditary pancreatitis;Cystic fibrosis;Bronchiectasis with or without elevated sweat chloride 1	germline;unknown	germline	GRCh37	NC_000007.13	7	117251692	117251692	na	na	7q31.2	reviewed by expert panel	14	-	N	ClinGen:CA325555,UniProtKB:P13569#VAR_000237,OMIM:602421.0054	3	7158	117251692	G	A	CFTR:NM_000492:exon20:c.G3197A:p.R1066H	0.0	pathogenic	0.0	pathogenic	0.998	pathogenic	0.978	pathogenic	3.28	pathogenic	0.96	pathogenic	-3.73	pathogenic
CFTR	22201	single nucleotide variant	NM_000492.4(CFTR):c.3196C>T (p.Arg1066Cys)	1080	CFTR	HGNC:1884	Pathogenic	1	Mar 17, 2017	78194216	-	RCV000007582|RCV000723839|RCV001004298|RCV001001063|RCV001831541|RCV002496299	MONDO:MONDO:0009061,MedGen:C0010674,OMIM:219700,Orphanet:586|MedGen:C3661900|MONDO:MONDO:0010178,MedGen:C0403814,OMIM:277180,Orphanet:48;MONDO:MONDO:0009061,MedGen:C0010674,OMIM:219700,Orphanet:586|MedGen:CN169374||MONDO:MONDO:0010178,MedGen:C0403814,OMIM:277180,Orphanet:48;MONDO:MONDO:0008185,MedGen:C0238339,OMIM:167800,Orphanet:676;MONDO:MONDO:0009061,MedGen:C0010674,OMIM:219700,Orphanet:586;MO…	Cystic fibrosis|not provided|Congenital bilateral aplasia of vas deferens from CFTR mutation;Cystic fibrosis|not specified|CFTR-related disorders|Congenital bilateral aplasia of vas deferens from CFTR mutation;Hereditary pancreatitis;Cystic fibrosis;Bronchiectasis with or without elevated sweat chloride 1	germline;unknown	germline	GRCh37	NC_000007.13	7	117251691	117251691	na	na	7q31.2	reviewed by expert panel	22	-	Y	ClinGen:CA325558,UniProtKB:P13569#VAR_000236,OMIM:602421.0058	3	7162	117251691	C	T	CFTR:NM_000492:exon20:c.C3196T:p.R1066C	0.0	pathogenic	0.0	pathogenic	1.0	pathogenic	1.0	pathogenic	4.32	pathogenic	0.93	pathogenic	-3.76	pathogenic
CFTR	22206	single nucleotide variant	NM_000492.4(CFTR):c.3848G>T (p.Arg1283Met)	1080	CFTR	HGNC:1884	Pathogenic	1	Dec 08, 2017	77902683	-	RCV000007587|RCV001831542	MONDO:MONDO:0009061,MedGen:C0010674,OMIM:219700,Orphanet:586|	Cystic fibrosis|CFTR-related disorders	germline	germline	GRCh37	NC_000007.13	7	117282622	117282622	na	na	7q31.2	reviewed by expert panel	3	-	N	ClinGen:CA325559,UniProtKB:P13569#VAR_000262,OMIM:602421.0063,ClinVar:1300168	3	7167	117282622	G	T	CFTR:NM_000492:exon23:c.G3848T:p.R1283M	0.0	pathogenic	0.004	pathogenic	1.0	pathogenic	1.0	pathogenic	3.51	pathogenic	0.95	pathogenic	-3.56	pathogenic
CFTR	22210	single nucleotide variant	NM_000492.4(CFTR):c.1040G>T (p.Arg347Leu)	1080	CFTR	HGNC:1884	Pathogenic/Likely pathogenic	1	Aug 14, 2023	77932196	-	RCV000007591|RCV001004252	MONDO:MONDO:0009061,MedGen:C0010674,OMIM:219700,Orphanet:586|MONDO:MONDO:0010178,MedGen:C0403814,OMIM:277180,Orphanet:48;MONDO:MONDO:0009061,MedGen:C0010674,OMIM:219700,Orphanet:586	Cystic fibrosis|Congenital bilateral aplasia of vas deferens from CFTR mutation;Cystic fibrosis	germline;unknown	germline	GRCh37	NC_000007.13	7	117180324	117180324	na	na	7q31.2	criteria provided, multiple submitters, no conflicts	6	-	N	ClinGen:CA325561,UniProtKB:P13569#VAR_000154,OMIM:602421.0067	3	7171	117180324	G	T	CFTR:NM_000492:exon8:c.G1040T:p.R347L	0.003	pathogenic	0.0	pathogenic	1.0	pathogenic	0.999	pathogenic	2.93	pathogenic	0.98	pathogenic	-2.49	pathogenic
CFTR	22220	single nucleotide variant	NM_000492.4(CFTR):c.274G>A (p.Glu92Lys)	1080	CFTR	HGNC:1884	Pathogenic	1	Mar 17, 2017	121908751	-	RCV000007601|RCV001009395|RCV001093484|RCV001831545	MONDO:MONDO:0009061,MedGen:C0010674,OMIM:219700,Orphanet:586|MONDO:MONDO:0009061,MedGen:C0010674,OMIM:219700,Orphanet:586;|MedGen:C3661900|	Cystic fibrosis|Cystic fibrosis;CFTR-related disorders|not provided|CFTR-related disorders	germline;unknown	germline	GRCh37	NC_000007.13	7	117170953	117170953	na	na	7q31.2	reviewed by expert panel	11	-	N	ClinGen:CA325572,UniProtKB:P13569#VAR_000115,OMIM:602421.0077	3	7181	117170953	G	A	CFTR:NM_000492:exon4:c.G274A:p.E92K	0.0	pathogenic	0.0	pathogenic	0.999	pathogenic	0.998	pathogenic	2.545	pathogenic	0.99	pathogenic	-6.65	pathogenic
CFTR	22221	single nucleotide variant	NM_000492.4(CFTR):c.1040G>A (p.Arg347His)	1080	CFTR	HGNC:1884	Pathogenic	1	Mar 17, 2017	77932196	-	RCV000007602|RCV000224726|RCV000508504|RCV001004250|RCV001009366|RCV001027909|RCV003421911	MONDO:MONDO:0009061,MedGen:C0010674,OMIM:219700,Orphanet:586|MedGen:C3661900|MedGen:CN169374|MONDO:MONDO:0010178,MedGen:C0403814,OMIM:277180,Orphanet:48;MONDO:MONDO:0009061,MedGen:C0010674,OMIM:219700,Orphanet:586|MONDO:MONDO:0009061,MedGen:C0010674,OMIM:219700,Orphanet:586;||	Cystic fibrosis|not provided|not specified|Congenital bilateral aplasia of vas deferens from CFTR mutation;Cystic fibrosis|Cystic fibrosis;CFTR-related disorders|CFTR-related disorders|CFTR-related condition	germline;unknown	germline	GRCh37	NC_000007.13	7	117180324	117180324	na	na	7q31.2	reviewed by expert panel	19	-	Y	ClinGen:CA340652,UniProtKB:P13569#VAR_000153,OMIM:602421.0078	3	7182	117180324	G	A	CFTR:NM_000492:exon8:c.G1040A:p.R347H	0.003	pathogenic	0.0	pathogenic	1.0	pathogenic	0.999	pathogenic	2.93	pathogenic	0.86	pathogenic	-2.88	pathogenic
CFTR	22222	single nucleotide variant	NM_000492.4(CFTR):c.271G>A (p.Gly91Arg)	1080	CFTR	HGNC:1884	Pathogenic	1	Aug 31, 2018	121908750	-	RCV000007603|RCV001831546	MONDO:MONDO:0009061,MedGen:C0010674,OMIM:219700,Orphanet:586|	Cystic fibrosis|CFTR-related disorders	germline	germline	GRCh37	NC_000007.13	7	117149194	117149194	na	na	7q31.2	reviewed by expert panel	5	-	N	ClinGen:CA325573,UniProtKB:P13569#VAR_000114,OMIM:602421.0079	3	7183	117149194	G	A	CFTR:NM_000492:exon3:c.G271A:p.G91R	0.004	pathogenic	0.0	pathogenic	0.951	pathogenic	0.939	pathogenic	1.265	pathogenic	0.86	pathogenic	-6.15	pathogenic
CFTR	22226	single nucleotide variant	NM_000492.4(CFTR):c.1438G>T (p.Gly480Cys)	1080	CFTR	HGNC:1884	Pathogenic/Likely pathogenic	1	Sep 05, 2022	79282516	-	RCV000007607|RCV000790782|RCV001004453	MONDO:MONDO:0009061,MedGen:C0010674,OMIM:219700,Orphanet:586|MedGen:C3661900|MONDO:MONDO:0010178,MedGen:C0403814,OMIM:277180,Orphanet:48;MONDO:MONDO:0009061,MedGen:C0010674,OMIM:219700,Orphanet:586	Cystic fibrosis|not provided|Congenital bilateral aplasia of vas deferens from CFTR mutation;Cystic fibrosis	germline;unknown	germline	GRCh37	NC_000007.13	7	117199563	117199563	na	na	7q31.2	criteria provided, multiple submitters, no conflicts	9	-	N	ClinGen:CA221007,UniProtKB:P13569#VAR_000165,OMIM:602421.0083	3	7187	117199563	G	T	CFTR:NM_000492:exon11:c.G1438T:p.G480C	0.0	pathogenic	0.0	pathogenic	1.0	pathogenic	1.0	pathogenic	4.615	pathogenic	0.98	pathogenic	-5.11	pathogenic
CFTR	22229	single nucleotide variant	NM_000492.4(CFTR):c.617T>G (p.Leu206Trp)	1080	CFTR	HGNC:1884	Pathogenic; drug response	1	Mar 24, 2021	121908752	-	RCV000007611|RCV000079011|RCV000660772|RCV000763156|RCV001004443|RCV001009388|RCV001831547	MONDO:MONDO:0009061,MedGen:C0010674,OMIM:219700,Orphanet:586|MedGen:C3661900|MedGen:CN322735|MONDO:MONDO:0010178,MedGen:C0403814,OMIM:277180,Orphanet:48;MONDO:MONDO:0008185,MedGen:C0238339,OMIM:167800,Orphanet:676;MONDO:MONDO:0009061,MedGen:C0010674,OMIM:219700,Orphanet:586;MONDO:MONDO:0008887,MedGen:C2749757,OMIM:211400,Orphanet:60033|MONDO:MONDO:0010178,MedGen:C0403814,OMIM:277180,Orphanet:48;M…	Cystic fibrosis|not provided|ivacaftor response - Efficacy|Congenital bilateral aplasia of vas deferens from CFTR mutation;Hereditary pancreatitis;Cystic fibrosis;Bronchiectasis with or without elevated sweat chloride 1|Congenital bilateral aplasia of vas deferens from CFTR mutation;Cystic fibrosis|Cystic fibrosis;CFTR-related disorders|CFTR-related disorders	germline;paternal;unknown	germline	GRCh37	NC_000007.13	7	117175339	117175339	na	na	7q31.2	reviewed by expert panel	27	-	Y	ClinGen:CA221035,UniProtKB:P13569#VAR_000136,OMIM:602421.0084	3	7190	117175339	T	G	CFTR:NM_000492:exon6:c.T617G:p.L206W	0.002	pathogenic	0.0	pathogenic	1.0	pathogenic	0.999	pathogenic	2.785	pathogenic	0.95	pathogenic	-2.88	pathogenic
CFTR	22231	single nucleotide variant	NM_000492.4(CFTR):c.3763T>C (p.Ser1255Pro)	1080	CFTR	HGNC:1884	Pathogenic; drug response	1	Mar 24, 2021	121909041	-	RCV000007613|RCV001787320|RCV002247264	MONDO:MONDO:0009061,MedGen:C0010674,OMIM:219700,Orphanet:586|MedGen:CN322735|MONDO:MONDO:0008185,MedGen:C0238339,OMIM:167800,Orphanet:676	Cystic fibrosis|ivacaftor response - Efficacy|Hereditary pancreatitis	germline;unknown	germline	GRCh37	NC_000007.13	7	117282537	117282537	na	na	7q31.2	reviewed by expert panel	9	-	Y	PharmGKB Clinical Annotation:1183960785,ClinGen:CA325580,UniProtKB:P13569#VAR_000259,OMIM:602421.0113	3	7192	117282537	T	C	CFTR:NM_000492:exon23:c.T3763C:p.S1255P	0.044	pathogenic	0.023	pathogenic	0.744	pathogenic	0.529	pathogenic	3.185	pathogenic	0.81	pathogenic	-3.34	pathogenic
CFTR	22232	single nucleotide variant	NM_000492.4(CFTR):c.1013C>T (p.Thr338Ile)	1080	CFTR	HGNC:1884	Pathogenic	1	Mar 17, 2017	77409459	-	RCV000007614|RCV000506655|RCV001009472|RCV001269654	MONDO:MONDO:0009061,MedGen:C0010674,OMIM:219700,Orphanet:586|MedGen:CN169374||MedGen:CN517202	Cystic fibrosis|not specified|CFTR-related disorders|not provided	germline;unknown	germline	GRCh37	NC_000007.13	7	117180297	117180297	na	na	7q31.2	reviewed by expert panel	11	-	N	ClinGen:CA325581,UniProtKB:P13569#VAR_000151,OMIM:602421.0087	3	7193	117180297	C	T	CFTR:NM_000492:exon8:c.C1013T:p.T338I	0.008	pathogenic	0.0	pathogenic	0.999	pathogenic	0.997	pathogenic	1.565	pathogenic	0.97	pathogenic	-2.79	pathogenic
CFTR	22236	single nucleotide variant	NM_000492.4(CFTR):c.326A>G (p.Tyr109Cys)	1080	CFTR	HGNC:1884	Pathogenic	1	Aug 23, 2022	121909031	-	RCV000007618	MONDO:MONDO:0009061,MedGen:C0010674,OMIM:219700,Orphanet:586	Cystic fibrosis	germline;unknown	germline	GRCh37	NC_000007.13	7	117171005	117171005	na	na	7q31.2	criteria provided, multiple submitters, no conflicts	3	-	N	ClinGen:CA325582,UniProtKB:P13569#VAR_000118,OMIM:602421.0091	3	7197	117171005	A	G	CFTR:NM_000492:exon4:c.A326G:p.Y109C	0.0	pathogenic	0.0	pathogenic	1.0	pathogenic	0.992	pathogenic	1.845	pathogenic	0.97	pathogenic	-6.1	pathogenic
CFTR	22237	single nucleotide variant	NM_000492.4(CFTR):c.1055G>A (p.Arg352Gln)	1080	CFTR	HGNC:1884	Pathogenic; drug response	1	Mar 24, 2021	121908753	-	RCV000007619|RCV000660773|RCV000763568|RCV000985669|RCV001004254|RCV001826444	MONDO:MONDO:0009061,MedGen:C0010674,OMIM:219700,Orphanet:586|MedGen:CN322735|MONDO:MONDO:0010178,MedGen:C0403814,OMIM:277180,Orphanet:48;MONDO:MONDO:0008887,MedGen:C2749757,OMIM:211400,Orphanet:60033;MONDO:MONDO:0008185,MedGen:C0238339,OMIM:167800,Orphanet:676;MONDO:MONDO:0009061,MedGen:C0010674,OMIM:219700,Orphanet:586|MedGen:CN517202|MONDO:MONDO:0010178,MedGen:C0403814,OMIM:277180,Orphanet:48;M…	Cystic fibrosis|ivacaftor response - Efficacy|Congenital bilateral aplasia of vas deferens from CFTR mutation;Bronchiectasis with or without elevated sweat chloride 1;Hereditary pancreatitis;Cystic fibrosis|not provided|Congenital bilateral aplasia of vas deferens from CFTR mutation;Cystic fibrosis|CFTR-related disorders	germline;unknown	germline	GRCh37	NC_000007.13	7	117180339	117180339	na	na	7q31.2	reviewed by expert panel	18	-	N	ClinGen:CA325583,UniProtKB:P13569#VAR_000156,OMIM:602421.0092	3	7198	117180339	G	A	CFTR:NM_000492:exon8:c.G1055A:p.R352Q	0.007	pathogenic	0.0	pathogenic	1.0	pathogenic	0.995	pathogenic	1.95	pathogenic	0.86	pathogenic	-2.88	pathogenic
CFTR	22247	single nucleotide variant	NM_000492.4(CFTR):c.3194T>C (p.Leu1065Pro)	1080	CFTR	HGNC:1884	Pathogenic	1	Mar 17, 2017	121909036	-	RCV000007629|RCV000311326|RCV001004297|RCV001831550	MONDO:MONDO:0009061,MedGen:C0010674,OMIM:219700,Orphanet:586|MedGen:CN517202|MONDO:MONDO:0010178,MedGen:C0403814,OMIM:277180,Orphanet:48;MONDO:MONDO:0009061,MedGen:C0010674,OMIM:219700,Orphanet:586|	Cystic fibrosis|not provided|Congenital bilateral aplasia of vas deferens from CFTR mutation;Cystic fibrosis|CFTR-related disorders	germline;unknown	germline	GRCh37	NC_000007.13	7	117251689	117251689	na	na	7q31.2	reviewed by expert panel	10	-	N	ClinGen:CA325596,UniProtKB:P13569#VAR_000234,OMIM:602421.0103	3	7208	117251689	T	C	CFTR:NM_000492:exon20:c.T3194C:p.L1065P	0.001	pathogenic	0.0	pathogenic	0.996	pathogenic	0.982	pathogenic	2.545	pathogenic	0.98	pathogenic	-2.66	pathogenic
CFTR	22249	single nucleotide variant	NM_000492.4(CFTR):c.3254A>G (p.His1085Arg)	1080	CFTR	HGNC:1884	Pathogenic/Likely pathogenic	1	Sep 05, 2022	79635528	-	RCV000007631	MONDO:MONDO:0009061,MedGen:C0010674,OMIM:219700,Orphanet:586	Cystic fibrosis	germline;unknown	germline	GRCh37	NC_000007.13	7	117251749	117251749	na	na	7q31.2	criteria provided, multiple submitters, no conflicts	5	-	N	ClinGen:CA325598,UniProtKB:P13569#VAR_000246,OMIM:602421.0105	3	7210	117251749	A	G	CFTR:NM_000492:exon20:c.A3254G:p.H1085R	0.078	benign	0.0	pathogenic	0.999	pathogenic	0.997	pathogenic	2.825	pathogenic	0.99	pathogenic	-3.43	pathogenic
CFTR	22254	single nucleotide variant	NM_000492.4(CFTR):c.3700A>G (p.Ile1234Val)	1080	CFTR	HGNC:1884	Pathogenic	1	Mar 17, 2017	75389940	-	RCV000007636|RCV001269696|RCV001831553|RCV003407298	MONDO:MONDO:0009061,MedGen:C0010674,OMIM:219700,Orphanet:586|MedGen:C3661900||	Cystic fibrosis|not provided|CFTR-related disorders|CFTR-related condition	germline;unknown	germline	GRCh37	NC_000007.13	7	117267807	117267807	na	na	7q31.2	reviewed by expert panel	15	-	N	ClinGen:CA325601,UniProtKB:P13569#VAR_000254,OMIM:602421.0110	3	7215	117267807	A	G	CFTR:NM_000492:exon22:c.A3700G:p.I1234V	0.191	benign	0.918	benign	0.001	benign	0.006	benign	0.285	benign	0.64	pathogenic	-3.25	pathogenic
CFTR	22256	single nucleotide variant	NM_000492.4(CFTR):c.3752G>A (p.Ser1251Asn)	1080	CFTR	HGNC:1884	Pathogenic; drug response	1	Mar 24, 2021	74503330	-	RCV000007638|RCV000211301|RCV000506301|RCV000780175|RCV001826447	MONDO:MONDO:0009061,MedGen:C0010674,OMIM:219700,Orphanet:586|MedGen:CN322735|MedGen:C3661900|MedGen:CN169374|	Cystic fibrosis|ivacaftor response - Efficacy|not provided|not specified|CFTR-related disorders	germline;unknown	germline	GRCh37	NC_000007.13	7	117282526	117282526	na	na	7q31.2	reviewed by expert panel	15	-	Y	PharmGKB Clinical Annotation:1183960800,ClinGen:CA325603,UniProtKB:P13569#VAR_000258,OMIM:602421.0112,ClinVar:1300167	3	7217	117282526	G	A	CFTR:NM_000492:exon23:c.G3752A:p.S1251N	0.002	pathogenic	0.001	pathogenic	0.993	pathogenic	0.965	pathogenic	4.735	pathogenic	0.95	pathogenic	-4.58	pathogenic
CFTR	22279	single nucleotide variant	NM_000492.4(CFTR):c.1682C>A (p.Ala561Glu)	1080	CFTR	HGNC:1884	Pathogenic	1	Mar 17, 2017	121909047	-	RCV000007662|RCV000759032|RCV001004265|RCV001826451	MONDO:MONDO:0009061,MedGen:C0010674,OMIM:219700,Orphanet:586|MedGen:CN517202|MONDO:MONDO:0010178,MedGen:C0403814,OMIM:277180,Orphanet:48;MONDO:MONDO:0009061,MedGen:C0010674,OMIM:219700,Orphanet:586|	Cystic fibrosis|not provided|Congenital bilateral aplasia of vas deferens from CFTR mutation;Cystic fibrosis|CFTR-related disorders	germline;unknown	germline	GRCh37	NC_000007.13	7	117230409	117230409	na	na	7q31.2	reviewed by expert panel	11	-	N	ClinGen:CA325617,OMIM:602421.0136	3	7240	117230409	C	A	CFTR:NM_000492:exon13:c.C1682A:p.A561E	0.001	pathogenic	0.002	pathogenic	1.0	pathogenic	1.0	pathogenic	3.825	pathogenic	0.84	pathogenic	-3.25	pathogenic
SOX10	22447	single nucleotide variant	NM_006941.4(SOX10):c.470C>T (p.Ala157Val)	6663	SOX10	HGNC:11190	Pathogenic	1	Feb 04, 2022	121909117	-	RCV000007833|RCV002273922	MONDO:MONDO:0013202,MedGen:C2750452,OMIM:613266,Orphanet:897|MedGen:C3661900	Waardenburg syndrome type 4C|not provided	germline	germline	GRCh37	NC_000022.10	22	38374101	38374101	na	na	22q13.1	criteria provided, single submitter	2	-	N	ClinGen:CA118779,UniProtKB:P56693#VAR_066752,OMIM:602229.0016	3	7408	38374101	G	A	SOX10:NM_006941:exon3:c.C470T:p.A157V	0.0	pathogenic	0.024	pathogenic	0.999	pathogenic	0.967	pathogenic	3.515	pathogenic	0.96	pathogenic	-3.82	pathogenic
COX10	22563	single nucleotide variant	NM_001303.4(COX10):c.674C>T (p.Pro225Leu)	1352	COX10	HGNC:2260	Likely pathogenic	1	Jan 31, 2022	104894556	-	RCV000007959	MONDO:MONDO:0033635,MedGen:C5436682,OMIM:619046	Mitochondrial complex 4 deficiency, nuclear type 3	germline	germline	GRCh37	NC_000017.10	17	14063243	14063243	na	na	17p12	criteria provided, single submitter	2	-	N	ClinGen:CA118861,UniProtKB:Q12887#VAR_026564,OMIM:602125.0003	3	7524	14063243	C	T	COX10:NM_001303:exon5:c.C674T:p.P225L	0.733	benign	0.768	benign	0.998	pathogenic	0.954	pathogenic	3.36	pathogenic	0.9	pathogenic	-5.09	pathogenic
COX10	22564	single nucleotide variant	NM_001303.4(COX10):c.1007A>T (p.Asp336Val)	1352	COX10	HGNC:2260	Pathogenic/Likely pathogenic	1	Jul 30, 2021	104894557	-	RCV000007960|RCV000995747	MONDO:MONDO:0033635,MedGen:C5436682,OMIM:619046|MONDO:MONDO:0009068,MedGen:C5435656,OMIM:220110,Orphanet:254905	Mitochondrial complex 4 deficiency, nuclear type 3|Cytochrome-c oxidase deficiency disease	germline;inherited;maternal;unknown	germline	GRCh37	NC_000017.10	17	14110205	14110205	na	na	17p12	criteria provided, multiple submitters, no conflicts	5	-	N	ClinGen:CA118862,UniProtKB:Q12887#VAR_026566,OMIM:602125.0004	3	7525	14110205	A	T	COX10:NM_001303:exon7:c.A1007T:p.D336V	0.001	pathogenic	0.002	pathogenic	1.0	pathogenic	0.997	pathogenic	4.26	pathogenic	1.0	pathogenic	-4.66	pathogenic
HSD17B4	22695	single nucleotide variant	NM_000414.4(HSD17B4):c.1369A>T (p.Asn457Tyr)	3295	HSD17B4	HGNC:5213	Pathogenic/Likely pathogenic	1	Mar 20, 2023	137853097	-	RCV000008095|RCV000385297|RCV000477799|RCV000684773|RCV001002204	MONDO:MONDO:0009855,MedGen:C0342870,OMIM:261515,Orphanet:300|MedGen:CN517202|MONDO:MONDO:0009855,MedGen:C0342870,OMIM:261515,Orphanet:300;MONDO:MONDO:0009300,MedGen:C4551721,OMIM:233400,Orphanet:2855|MONDO:MONDO:0017312,MedGen:C0685838,OMIM:PS233400,Orphanet:2855;MONDO:MONDO:0009855,MedGen:C0342870,OMIM:261515,Orphanet:300|MedGen:CN169374	Bifunctional peroxisomal enzyme deficiency|not provided|Bifunctional peroxisomal enzyme deficiency;Perrault syndrome 1|Perrault syndrome;Bifunctional peroxisomal enzyme deficiency|not specified	germline;maternal;unknown	germline	GRCh37	NC_000005.9	5	118844871	118844871	na	na	5q23.1	criteria provided, multiple submitters, no conflicts	12	-	N	ClinGen:CA118961,UniProtKB:P51659#VAR_065908,OMIM:601860.0004	3	7656	118844871	A	T	HSD17B4:NM_001199292:exon15:c.A1315T:p.N439Y,HSD17B4:NM_000414:exon16:c.A1369T:p.N457Y,HSD17B4:NM_001292028:exon16:c.A949T:p.N317Y,HSD17B4:NM_001199291:exon17:c.A1444T:p.N482Y,HSD17B4:NM_001292027:exon17:c.A1297T:p.N433Y	0.002	pathogenic	0.002	pathogenic	1.0	pathogenic	0.982	pathogenic	3.785	pathogenic	0.95	pathogenic	-1.94	pathogenic
SLC5A5	22705	single nucleotide variant	NM_000453.3(SLC5A5):c.799C>G (p.Gln267Glu)	6528	SLC5A5	HGNC:11040	Likely pathogenic	1	Feb 06, 2023	121909176	-	RCV000008105|RCV002281040	MONDO:MONDO:0020716,MedGen:C1848805,OMIM:274400,Orphanet:95716|MedGen:CN517202	Familial thyroid dyshormonogenesis 1|not provided	germline;unknown	germline	GRCh37	NC_000019.9	19	17988632	17988632	na	na	19p13.11	criteria provided, multiple submitters, no conflicts	3	-	N	ClinGen:CA118966,UniProtKB:Q92911#VAR_010265,OMIM:601843.0003	3	7666	17988632	C	G	SLC5A5:NM_000453:exon6:c.C799G:p.Q267E	0.0	pathogenic	0.002	pathogenic	1.0	pathogenic	0.999	pathogenic	3.865	pathogenic	0.84	pathogenic	-2.4	pathogenic
SLC5A5	22709	single nucleotide variant	NM_000453.3(SLC5A5):c.1183G>A (p.Gly395Arg)	6528	SLC5A5	HGNC:11040	Pathogenic	1	Jul 20, 2023	121909180	-	RCV000008109|RCV001270338	MONDO:MONDO:0020716,MedGen:C1848805,OMIM:274400,Orphanet:95716|Human Phenotype Ontology:HP:0000851,MONDO:MONDO:0018612,MedGen:C0010308,Orphanet:442	Familial thyroid dyshormonogenesis 1|Congenital hypothyroidism	germline	germline	GRCh37	NC_000019.9	19	17992969	17992969	na	na	19p13.11	criteria provided, single submitter	3	-	N	ClinGen:CA118971,UniProtKB:Q92911#VAR_010267,OMIM:601843.0007	3	7670	17992969	G	A	SLC5A5:NM_000453:exon10:c.G1183A:p.G395R	0.0	pathogenic	0.028	pathogenic	1.0	pathogenic	1.0	pathogenic	3.845	pathogenic	0.6	pathogenic	-2.36	pathogenic
PMM2	22745	single nucleotide variant	NM_000303.3(PMM2):c.422G>A (p.Arg141His)	5373	PMM2	HGNC:9115	Pathogenic/Likely pathogenic	1	May 01, 2023	28936415	-	RCV000008145|RCV000078590|RCV000624874|RCV000991177|RCV001003990|RCV001003989|RCV001003991|RCV001257998|RCV002255089	MONDO:MONDO:0008907,MedGen:C0349653,OMIM:212065,Orphanet:79318|MedGen:C3661900|MeSH:D030342,MedGen:C0950123|MONDO:MONDO:0015286,MedGen:C0282577,Orphanet:137|Human Phenotype Ontology:HP:0001251,Human Phenotype Ontology:HP:0001253,Human Phenotype Ontology:HP:0002513,Human Phenotype Ontology:HP:0007050,Human Phenotype Ontology:HP:0007157,MONDO:MONDO:0000437,MedGen:C0007758,Orphanet:102002|Human Phen…	PMM2-congenital disorder of glycosylation|not provided|Inborn genetic diseases|Congenital disorder of glycosylation|Cerebellar ataxia|Cerebellar ataxia;Diabetes mellitus;Muscular dystrophy;Congenital cerebellar hypoplasia|6 conditions|Congenital cerebellar hypoplasia|Congenital disorder of glycosylation type I	germline;inherited;unknown	germline	GRCh37	NC_000016.9	16	8905010	8905010	na	na	16p13.2	criteria provided, multiple submitters, no conflicts	51	-	N	ClinGen:CA220621,UniProtKB:O15305#VAR_006105,OMIM:601785.0001	3	7706	8905010	G	A	PMM2:NM_000303:exon5:c.G422A:p.R141H	0.031	pathogenic	0.035	pathogenic	0.993	pathogenic	0.51	pathogenic	4.07	pathogenic	0.95	pathogenic	-5.59	pathogenic
PMM2	22746	single nucleotide variant	NM_000303.3(PMM2):c.647A>T (p.Asn216Ile)	5373	PMM2	HGNC:9115	Pathogenic/Likely pathogenic	1	Sep 01, 2022	78290141	-	RCV000008146|RCV000724043	MONDO:MONDO:0008907,MedGen:C0349653,OMIM:212065,Orphanet:79318|MedGen:CN517202	PMM2-congenital disorder of glycosylation|not provided	germline	germline	GRCh37	NC_000016.9	16	8941588	8941588	na	na	16p13.2	criteria provided, multiple submitters, no conflicts	8	-	N	ClinGen:CA254229,UniProtKB:O15305#VAR_006110,OMIM:601785.0002	3	7707	8941588	A	T	PMM2:NM_000303:exon8:c.A647T:p.N216I	0.0	pathogenic	0.0	pathogenic	1.0	pathogenic	0.998	pathogenic	4.07	pathogenic	0.99	pathogenic	-6.29	pathogenic
PMM2	22747	single nucleotide variant	NM_000303.3(PMM2):c.385G>A (p.Val129Met)	5373	PMM2	HGNC:9115	Pathogenic/Likely pathogenic	1	Oct 08, 2022	104894525	-	RCV000008147|RCV000344673	MONDO:MONDO:0008907,MedGen:C0349653,OMIM:212065,Orphanet:79318|MedGen:CN517202	PMM2-congenital disorder of glycosylation|not provided	germline;unknown	germline	GRCh37	NC_000016.9	16	8904973	8904973	na	na	16p13.2	criteria provided, multiple submitters, no conflicts	10	-	N	ClinGen:CA254230,UniProtKB:O15305#VAR_006102,OMIM:601785.0003	3	7708	8904973	G	A	PMM2:NM_000303:exon5:c.G385A:p.V129M	0.001	pathogenic	0.001	pathogenic	1.0	pathogenic	0.982	pathogenic	3.72	pathogenic	0.96	pathogenic	-5.21	pathogenic
PMM2	22748	single nucleotide variant	NM_000303.3(PMM2):c.484C>T (p.Arg162Trp)	5373	PMM2	HGNC:9115	Pathogenic/Likely pathogenic	1	Oct 31, 2022	104894526	-	RCV000008148|RCV000403363	MONDO:MONDO:0008907,MedGen:C0349653,OMIM:212065,Orphanet:79318|MedGen:C3661900	PMM2-congenital disorder of glycosylation|not provided	germline;unknown	germline	GRCh37	NC_000016.9	16	8905531	8905531	na	na	16p13.2	criteria provided, multiple submitters, no conflicts	14	-	N	ClinGen:CA254231,UniProtKB:O15305#VAR_006106,OMIM:601785.0004	3	7709	8905531	C	T	PMM2:NM_000303:exon6:c.C484T:p.R162W	0.0	pathogenic	0.059	benign	0.011	benign	0.017	benign	2.86	pathogenic	0.96	pathogenic	-5.1	pathogenic
PMM2	22749	single nucleotide variant	NM_000303.3(PMM2):c.193G>T (p.Asp65Tyr)	5373	PMM2	HGNC:9115	Pathogenic	1	Feb 14, 2022	104894527	-	RCV000008149|RCV001530152	MONDO:MONDO:0008907,MedGen:C0349653,OMIM:212065,Orphanet:79318|MedGen:CN517202	PMM2-congenital disorder of glycosylation|not provided	germline;unknown	germline	GRCh37	NC_000016.9	16	8898638	8898638	na	na	16p13.2	criteria provided, multiple submitters, no conflicts	6	-	N	ClinGen:CA254232,UniProtKB:O15305#VAR_006094,OMIM:601785.0005	3	7710	8898638	G	T	PMM2:NM_000303:exon3:c.G193T:p.D65Y	0.007	pathogenic	0.009	pathogenic	0.986	pathogenic	0.873	pathogenic	3.63	pathogenic	0.91	pathogenic	-5.66	pathogenic
PMM2	22750	single nucleotide variant	NM_000303.3(PMM2):c.357C>A (p.Phe119Leu)	5373	PMM2	HGNC:9115	Pathogenic	1	Oct 09, 2022	80338701	-	RCV000008150|RCV000624449|RCV000790706	MONDO:MONDO:0008907,MedGen:C0349653,OMIM:212065,Orphanet:79318|MeSH:D030342,MedGen:C0950123|MedGen:C3661900	PMM2-congenital disorder of glycosylation|Inborn genetic diseases|not provided	germline;maternal;unknown	germline	GRCh37	NC_000016.9	16	8904945	8904945	na	na	16p13.2	criteria provided, multiple submitters, no conflicts	23	-	N	ClinGen:CA220620,UniProtKB:O15305#VAR_006100,OMIM:601785.0006,OMIM:601785.0010	3	7711	8904945	C	A	PMM2:NM_000303:exon5:c.C357A:p.F119L	0.001	pathogenic	0.001	pathogenic	1.0	pathogenic	0.994	pathogenic	4.07	pathogenic	0.96	pathogenic	-5.43	pathogenic
PMM2	22751	single nucleotide variant	NM_000303.3(PMM2):c.563A>G (p.Asp188Gly)	5373	PMM2	HGNC:9115	Pathogenic/Likely pathogenic	1	Sep 17, 2022	80338704	-	RCV000008151|RCV000790726	MONDO:MONDO:0008907,MedGen:C0349653,OMIM:212065,Orphanet:79318|MedGen:C3661900	PMM2-congenital disorder of glycosylation|not provided	germline;unknown	germline	GRCh37	NC_000016.9	16	8906887	8906887	na	na	16p13.2	criteria provided, multiple submitters, no conflicts	8	-	N	ClinGen:CA234697,UniProtKB:O15305#VAR_006108,OMIM:601785.0007	3	7712	8906887	A	G	PMM2:NM_000303:exon7:c.A563G:p.D188G	0.001	pathogenic	0.002	pathogenic	1.0	pathogenic	1.0	pathogenic	4.055	pathogenic	0.98	pathogenic	-5.14	pathogenic
PMM2	22752	single nucleotide variant	NM_000303.3(PMM2):c.349G>C (p.Gly117Arg)	5373	PMM2	HGNC:9115	Likely pathogenic	1	Dec 07, 2021	104894530	-	RCV000008152	MONDO:MONDO:0008907,MedGen:C0349653,OMIM:212065,Orphanet:79318	PMM2-congenital disorder of glycosylation	germline	germline	GRCh37	NC_000016.9	16	8904937	8904937	na	na	16p13.2	criteria provided, single submitter	2	-	N	ClinGen:CA254233,UniProtKB:O15305#VAR_006099,OMIM:601785.0008	3	7713	8904937	G	C	PMM2:NM_000303:exon5:c.G349C:p.G117R	0.0	pathogenic	0.001	pathogenic	1.0	pathogenic	1.0	pathogenic	4.065	pathogenic	1.0	pathogenic	-5.94	pathogenic
PMM2	22755	single nucleotide variant	NM_000303.3(PMM2):c.710C>G (p.Thr237Arg)	5373	PMM2	HGNC:9115	Pathogenic/Likely pathogenic	1	Nov 03, 2022	80338708	-	RCV000008155|RCV000790820|RCV002251889|RCV002512893	MONDO:MONDO:0008907,MedGen:C0349653,OMIM:212065,Orphanet:79318|MedGen:C3661900||MeSH:D030342,MedGen:C0950123	PMM2-congenital disorder of glycosylation|not provided|See cases|Inborn genetic diseases	germline;unknown	germline	GRCh37	NC_000016.9	16	8941651	8941651	na	na	16p13.2	criteria provided, multiple submitters, no conflicts	20	-	N	ClinGen:CA220629,UniProtKB:O15305#VAR_022508,OMIM:601785.0011	3	7716	8941651	C	G	PMM2:NM_000303:exon8:c.C710G:p.T237R	0.0	pathogenic	0.0	pathogenic	1.0	pathogenic	1.0	pathogenic	4.055	pathogenic	1.0	pathogenic	-5.15	pathogenic
PMM2	22756	single nucleotide variant	NM_000303.3(PMM2):c.722G>C (p.Cys241Ser)	5373	PMM2	HGNC:9115	Pathogenic	1	Jul 20, 2023	80338709	-	RCV000008156|RCV000153745|RCV000623621	MONDO:MONDO:0008907,MedGen:C0349653,OMIM:212065,Orphanet:79318|MedGen:C3661900|MeSH:D030342,MedGen:C0950123	PMM2-congenital disorder of glycosylation|not provided|Inborn genetic diseases	germline;unknown	germline	GRCh37	NC_000016.9	16	8941663	8941663	na	na	16p13.2	criteria provided, multiple submitters, no conflicts	17	-	N	ClinGen:CA234698,UniProtKB:O15305#VAR_022510,OMIM:601785.0012	3	7717	8941663	G	C	PMM2:NM_000303:exon8:c.G722C:p.C241S	0.016	pathogenic	0.12	benign	0.987	pathogenic	0.982	pathogenic	3.145	pathogenic	0.97	pathogenic	-4.87	pathogenic
PMM2	22757	single nucleotide variant	NM_000303.3(PMM2):c.395T>C (p.Ile132Thr)	5373	PMM2	HGNC:9115	Pathogenic	1	Jul 12, 2022	80338702	-	RCV000008157	MONDO:MONDO:0008907,MedGen:C0349653,OMIM:212065,Orphanet:79318	PMM2-congenital disorder of glycosylation	germline;unknown	germline	GRCh37	NC_000016.9	16	8904983	8904983	na	na	16p13.2	criteria provided, multiple submitters, no conflicts	7	-	N	ClinGen:CA340689,UniProtKB:O15305#VAR_006104,OMIM:601785.0013	3	7718	8904983	T	C	PMM2:NM_000303:exon5:c.T395C:p.I132T	0.001	pathogenic	0.003	pathogenic	0.955	pathogenic	0.988	pathogenic	3.74	pathogenic	0.94	pathogenic	-5.1	pathogenic
PMM2	22758	single nucleotide variant	NM_000303.3(PMM2):c.691G>A (p.Val231Met)	5373	PMM2	HGNC:9115	Pathogenic	1	Apr 11, 2023	80338707	-	RCV000008158|RCV000790822	MONDO:MONDO:0008907,MedGen:C0349653,OMIM:212065,Orphanet:79318|MedGen:C3661900	PMM2-congenital disorder of glycosylation|not provided	germline;unknown	germline	GRCh37	NC_000016.9	16	8941632	8941632	na	na	16p13.2	criteria provided, multiple submitters, no conflicts	18	-	N	ClinGen:CA220628,UniProtKB:O15305#VAR_006113,OMIM:601785.0014	3	7719	8941632	G	A	PMM2:NM_000303:exon8:c.G691A:p.V231M	0.0	pathogenic	0.001	pathogenic	1.0	pathogenic	0.991	pathogenic	4.065	pathogenic	0.97	pathogenic	-5.49	pathogenic
PMM2	22759	single nucleotide variant	NM_000303.3(PMM2):c.26G>A (p.Cys9Tyr)	5373	PMM2	HGNC:9115	Pathogenic/Likely pathogenic	1	Apr 23, 2018	104894532	-	RCV000008159	MONDO:MONDO:0008907,MedGen:C0349653,OMIM:212065,Orphanet:79318	PMM2-congenital disorder of glycosylation	germline;unknown	germline	GRCh37	NC_000016.9	16	8891765	8891765	na	na	16p13.2	criteria provided, multiple submitters, no conflicts	3	-	N	ClinGen:CA254235,UniProtKB:O15305#VAR_022469,OMIM:601785.0015	3	7720	8891765	G	A	PMM2:NM_000303:exon1:c.G26A:p.C9Y	0.002	pathogenic	0.002	pathogenic	0.368	benign	0.113	benign	2.31	pathogenic	0.94	pathogenic	-4.96	pathogenic
PMM2	22761	single nucleotide variant	NM_000303.3(PMM2):c.677C>G (p.Thr226Ser)	5373	PMM2	HGNC:9115	Pathogenic/Likely pathogenic	1	Apr 01, 2022	80338706	-	RCV000008161	MONDO:MONDO:0008907,MedGen:C0349653,OMIM:212065,Orphanet:79318	PMM2-congenital disorder of glycosylation	germline;unknown	germline	GRCh37	NC_000016.9	16	8941618	8941618	na	na	16p13.2	criteria provided, multiple submitters, no conflicts	4	-	N	UniProtKB:O15305#VAR_022505,OMIM:601785.0017,ClinGen:CA340691	3	7722	8941618	C	G	PMM2:NM_000303:exon8:c.C677G:p.T226S	0.0	pathogenic	0.002	pathogenic	0.973	pathogenic	0.853	pathogenic	3.985	pathogenic	0.91	pathogenic	-5.06	pathogenic
PMM2	22762	single nucleotide variant	NM_000303.3(PMM2):c.338C>T (p.Pro113Leu)	5373	PMM2	HGNC:9115	Pathogenic	1	Sep 18, 2022	80338700	-	RCV000008162|RCV000790784|RCV001003988	MONDO:MONDO:0008907,MedGen:C0349653,OMIM:212065,Orphanet:79318|MedGen:C3661900|6 conditions	PMM2-congenital disorder of glycosylation|not provided|6 conditions	germline;unknown	germline	GRCh37	NC_000016.9	16	8900255	8900255	na	na	16p13.2	criteria provided, multiple submitters, no conflicts	15	-	N	ClinGen:CA220619,UniProtKB:O15305#VAR_006098,OMIM:601785.0018	3	7723	8900255	C	T	PMM2:NM_000303:exon4:c.C338T:p.P113L	0.0	pathogenic	0.002	pathogenic	1.0	pathogenic	0.997	pathogenic	4.07	pathogenic	0.96	pathogenic	-5.81	pathogenic
PMM2	22764	single nucleotide variant	NM_000303.3(PMM2):c.131T>C (p.Val44Ala)	5373	PMM2	HGNC:9115	Pathogenic/Likely pathogenic	1	Aug 06, 2021	104894534	-	RCV000008164	MONDO:MONDO:0008907,MedGen:C0349653,OMIM:212065,Orphanet:79318	PMM2-congenital disorder of glycosylation	germline;unknown	germline	GRCh37	NC_000016.9	16	8895720	8895720	na	na	16p13.2	criteria provided, multiple submitters, no conflicts	5	-	N	ClinGen:CA254236,UniProtKB:O15305#VAR_006093,OMIM:601785.0020	3	7725	8895720	T	C	PMM2:NM_000303:exon2:c.T131C:p.V44A	0.0	pathogenic	0.0	pathogenic	1.0	pathogenic	0.992	pathogenic	4.065	pathogenic	0.96	pathogenic	-4.76	pathogenic
PROP1	23134	single nucleotide variant	NM_006261.5(PROP1):c.358C>T (p.Arg120Cys)	5626	PROP1	HGNC:9455	Pathogenic/Likely pathogenic	1	Apr 04, 2023	121917839	-	RCV000008563|RCV001389806	MONDO:MONDO:0009878,MedGen:C0878683,OMIM:262600|MedGen:C3661900	Pituitary hormone deficiency, combined, 2|not provided	germline;unknown	germline	GRCh37	NC_000005.9	5	177420033	177420033	na	na	5q35.3	criteria provided, multiple submitters, no conflicts	7	-	N	ClinGen:CA340722,UniProtKB:O75360#VAR_003770,OMIM:601538.0001	3	8095	177420033	G	A	PROP1:NM_006261:exon3:c.C358T:p.R120C	0.0	pathogenic	0.0	pathogenic	1.0	pathogenic	0.998	pathogenic	4.32	pathogenic	0.88	pathogenic	-4.45	pathogenic
PROP1	23135	single nucleotide variant	NM_006261.5(PROP1):c.349T>A (p.Phe117Ile)	5626	PROP1	HGNC:9455	Pathogenic/Likely pathogenic	1	Sep 27, 2023	121917840	-	RCV000008564|RCV001053358	MONDO:MONDO:0009878,MedGen:C0878683,OMIM:262600|MedGen:CN517202	Pituitary hormone deficiency, combined, 2|not provided	germline;unknown	germline	GRCh37	NC_000005.9	5	177420042	177420042	na	na	5q35.3	criteria provided, multiple submitters, no conflicts	6	-	N	ClinGen:CA340724,UniProtKB:O75360#VAR_003769,OMIM:601538.0003	3	8096	177420042	A	T	PROP1:NM_006261:exon3:c.T349A:p.F117I	0.0	pathogenic	0.0	pathogenic	0.999	pathogenic	0.996	pathogenic	4.455	pathogenic	0.95	pathogenic	-6.62	pathogenic
PROP1	23142	single nucleotide variant	NM_006261.5(PROP1):c.218G>A (p.Arg73His)	5626	PROP1	HGNC:9455	Pathogenic	1	Oct 05, 2022	121917842	-	RCV000008571|RCV001383203	MONDO:MONDO:0009878,MedGen:C0878683,OMIM:262600|MedGen:CN517202	Pituitary hormone deficiency, combined, 2|not provided	germline	germline	GRCh37	NC_000005.9	5	177421231	177421231	na	na	5q35.3	criteria provided, single submitter	2	-	N	OMIM:601538.0009,ClinGen:CA340731,UniProtKB:O75360#VAR_012746	3	8103	177421231	C	T	PROP1:NM_006261:exon2:c.G218A:p.R73H	0.0	pathogenic	0.084	benign	1.0	pathogenic	0.995	pathogenic	4.365	pathogenic	0.84	pathogenic	-5.51	pathogenic
PROP1	23143	single nucleotide variant	NM_006261.5(PROP1):c.217C>T (p.Arg73Cys)	5626	PROP1	HGNC:9455	Pathogenic	1	May 03, 2022	121917843	-	RCV000008572|RCV000821200	MONDO:MONDO:0009878,MedGen:C0878683,OMIM:262600|MedGen:CN517202	Pituitary hormone deficiency, combined, 2|not provided	germline;unknown	germline	GRCh37	NC_000005.9	5	177421232	177421232	na	na	5q35.3	criteria provided, multiple submitters, no conflicts	5	-	N	ClinGen:CA340733,UniProtKB:O75360#VAR_003768,OMIM:601538.0010	3	8104	177421232	G	A	PROP1:NM_006261:exon2:c.C217T:p.R73C	0.0	pathogenic	0.001	pathogenic	1.0	pathogenic	0.995	pathogenic	4.915	pathogenic	0.92	pathogenic	-5.53	pathogenic
PTCH1	23260	single nucleotide variant	NM_000264.5(PTCH1):c.1177G>A (p.Ala393Thr)	5727	PTCH1	HGNC:9585	Benign/Likely benign	1	Oct 26, 2022	199476091	-	RCV000008704|RCV000532256|RCV001010144	MONDO:MONDO:0012562,MedGen:C1835820,OMIM:610828,Orphanet:2162|MONDO:MONDO:0007187,MedGen:C0004779,OMIM:109400,Orphanet:377|MONDO:MONDO:0015356,MeSH:D009386,MedGen:C0027672,Orphanet:140162	Holoprosencephaly 7|Gorlin syndrome|Hereditary cancer-predisposing syndrome	germline	germline	GRCh37	NC_000009.11	9	98241320	98241320	na	na	9q22.32	criteria provided, multiple submitters, no conflicts	5	-	N	ClinGen:CA254347,UniProtKB:Q13635#VAR_032952,OMIM:601309.0011	3	8221	98241320	C	T	PTCH1:NM_000264:exon8:c.G1177A:p.A393T,PTCH1:NM_001083602:exon8:c.G979A:p.A327T,PTCH1:NM_001083603:exon8:c.G1174A:p.A392T,PTCH1:NM_001083604:exon8:c.G724A:p.A242T,PTCH1:NM_001083605:exon8:c.G724A:p.A242T,PTCH1:NM_001083606:exon8:c.G724A:p.A242T,PTCH1:NM_001083607:exon8:c.G724A:p.A242T,PTCH1:NM_001354918:exon8:c.G1177A:p.A393T	0.183	benign	0.211	benign	0.592	pathogenic	0.241	benign	1.735	pathogenic	1.0	pathogenic	-2.63	pathogenic
PTCH1	23261	single nucleotide variant	NM_000264.5(PTCH1):c.2183C>T (p.Thr728Met)	5727	PTCH1	HGNC:9585	Benign/Likely benign	1	May 01, 2023	115556836	-	RCV000008705|RCV000034564|RCV000078462|RCV000206005|RCV000568375|RCV002504769	MONDO:MONDO:0012562,MedGen:C1835820,OMIM:610828,Orphanet:2162|MedGen:C3661900|MedGen:CN169374|MONDO:MONDO:0007187,MedGen:C0004779,OMIM:109400,Orphanet:377|MONDO:MONDO:0015356,MeSH:D009386,MedGen:C0027672,Orphanet:140162|MONDO:MONDO:0011556,MedGen:C2751544,OMIM:605462;MONDO:MONDO:0007187,MedGen:C0004779,OMIM:109400,Orphanet:377;MONDO:MONDO:0012562,MedGen:C1835820,OMIM:610828,Orphanet:2162	Holoprosencephaly 7|not provided|not specified|Gorlin syndrome|Hereditary cancer-predisposing syndrome|Basal cell carcinoma, susceptibility to, 1;Gorlin syndrome;Holoprosencephaly 7	germline;unknown	germline	GRCh37	NC_000009.11	9	98231100	98231100	na	na	9q22.32	criteria provided, multiple submitters, no conflicts	16	-	N	ClinGen:CA145935,UniProtKB:Q13635#VAR_032954,OMIM:601309.0012	3	8222	98231100	G	A	PTCH1:NM_001354918:exon13:c.C2027T:p.T676M,PTCH1:NM_000264:exon14:c.C2183T:p.T728M,PTCH1:NM_001083602:exon14:c.C1985T:p.T662M,PTCH1:NM_001083603:exon14:c.C2180T:p.T727M,PTCH1:NM_001083604:exon14:c.C1730T:p.T577M,PTCH1:NM_001083605:exon14:c.C1730T:p.T577M,PTCH1:NM_001083606:exon14:c.C1730T:p.T577M,PTCH1:NM_001083607:exon14:c.C1730T:p.T577M	0.216	benign	0.215	benign	0.905	pathogenic	0.451	benign	1.39	pathogenic	0.1	benign	-2.08	pathogenic
PTCH1	23262	single nucleotide variant	NM_000264.5(PTCH1):c.2479A>G (p.Ser827Gly)	5727	PTCH1	HGNC:9585	Benign	1	Nov 03, 2022	199476092	-	RCV000008706|RCV000034565|RCV000121886|RCV000563051|RCV001083878	MONDO:MONDO:0012562,MedGen:C1835820,OMIM:610828,Orphanet:2162|MedGen:C3661900|MedGen:CN169374|MONDO:MONDO:0015356,MeSH:D009386,MedGen:C0027672,Orphanet:140162|MONDO:MONDO:0007187,MedGen:C0004779,OMIM:109400,Orphanet:377	Holoprosencephaly 7|not provided|not specified|Hereditary cancer-predisposing syndrome|Gorlin syndrome	germline;unknown	germline	GRCh37	NC_000009.11	9	98229479	98229479	na	na	9q22.32	criteria provided, multiple submitters, no conflicts	8	-	N	ClinGen:CA161671,UniProtKB:Q13635#VAR_032956,OMIM:601309.0013	3	8223	98229479	T	C	PTCH1:NM_001354918:exon14:c.A2323G:p.S775G,PTCH1:NM_000264:exon15:c.A2479G:p.S827G,PTCH1:NM_001083602:exon15:c.A2281G:p.S761G,PTCH1:NM_001083603:exon15:c.A2476G:p.S826G,PTCH1:NM_001083604:exon15:c.A2026G:p.S676G,PTCH1:NM_001083605:exon15:c.A2026G:p.S676G,PTCH1:NM_001083606:exon15:c.A2026G:p.S676G,PTCH1:NM_001083607:exon15:c.A2026G:p.S676G	0.393	benign	0.46	benign	0.004	benign	0.013	benign	0.325	benign	0.13	benign	-1.68	pathogenic
BMPR1A	23272	single nucleotide variant	NM_004329.3(BMPR1A):c.1013C>A (p.Ala338Asp)	657	BMPR1A	HGNC:1076	Likely pathogenic	1	Jan 12, 2017	199476086	-	RCV000566713|RCV001797978	MONDO:MONDO:0015356,MeSH:D009386,MedGen:C0027672,Orphanet:140162|MONDO:MONDO:0017380,MedGen:C0345893,OMIM:174900,Orphanet:2929	Hereditary cancer-predisposing syndrome|Juvenile polyposis syndrome	germline	germline	GRCh37	NC_000010.10	10	88679073	88679073	na	na	10q23.2	criteria provided, single submitter	2	ACMG2016,ACMG2021,ACMG2022	N	ClinGen:CA254361,UniProtKB:P36894#VAR_015534,OMIM:601299.0005	3	8233	88679073	C	A	BMPR1A:NM_004329:exon10:c.C1013A:p.A338D	0.006	pathogenic	0.01	pathogenic	0.988	pathogenic	0.952	pathogenic	2.085	pathogenic	0.93	pathogenic	-3.32	pathogenic
BMPR1A	23273	single nucleotide variant	NM_004329.3(BMPR1A):c.370T>C (p.Cys124Arg)	657	BMPR1A	HGNC:1076	Pathogenic/Likely pathogenic	1	Feb 07, 2022	199476087	-	RCV000165949|RCV001797979|RCV001836704	MONDO:MONDO:0015356,MeSH:D009386,MedGen:C0027672,Orphanet:140162|MONDO:MONDO:0017380,MedGen:C0345893,OMIM:174900,Orphanet:2929|MedGen:C3661900	Hereditary cancer-predisposing syndrome|Juvenile polyposis syndrome|not provided	germline	germline	GRCh37	NC_000010.10	10	88659587	88659587	na	na	10q23.2	criteria provided, multiple submitters, no conflicts	3	ACMG2016,ACMG2021,ACMG2022	N	ClinGen:CA194624,UniProtKB:P36894#VAR_015533,OMIM:601299.0006	3	8234	88659587	T	C	BMPR1A:NM_004329:exon6:c.T370C:p.C124R	0.0	pathogenic	0.001	pathogenic	0.996	pathogenic	0.988	pathogenic	3.205	pathogenic	0.94	pathogenic	-6.89	pathogenic
LEPR	23560	single nucleotide variant	NM_002303.6(LEPR):c.668A>G (p.Gln223Arg)	3953	LEPR	HGNC:6554	Benign	0	Nov 01, 2022	1137101	-	RCV000009047|RCV000281795|RCV000348520|RCV000518727|RCV001668124	|MedGen:CN239457|MONDO:MONDO:0013992,MedGen:C3554225,OMIM:614963,Orphanet:179494|MedGen:CN169374|MedGen:CN517202	LEPTIN RECEPTOR POLYMORPHISM|Monogenic Non-Syndromic Obesity|Obesity due to leptin receptor gene deficiency|not specified|not provided	germline	germline	GRCh37	NC_000001.10	1	66058513	66058513	na	na	1p31.3	criteria provided, multiple submitters, no conflicts	7	-	N	ClinGen:CA119663,UniProtKB:P48357#VAR_002705,OMIM:601007.0001	3	8521	66058513	A	G	LEPR:NM_001198687:exon5:c.A668G:p.Q223R,LEPR:NM_001198688:exon5:c.A668G:p.Q223R,LEPR:NM_001198689:exon5:c.A668G:p.Q223R,LEPR:NM_001003679:exon6:c.A668G:p.Q223R,LEPR:NM_001003680:exon6:c.A668G:p.Q223R,LEPR:NM_002303:exon6:c.A668G:p.Q223R	0.187	benign	0.191	benign	0.828	pathogenic	0.234	benign	1.935	pathogenic	0.05	benign	0.56	benign
LEPR	23562	single nucleotide variant	NM_002303.6(LEPR):c.326A>G (p.Lys109Arg)	3953	LEPR	HGNC:6554	Benign	0	Nov 01, 2022	1137100	-	RCV000009049|RCV000309499|RCV000366432|RCV000517666|RCV001707508	|MONDO:MONDO:0013992,MedGen:C3554225,OMIM:614963,Orphanet:179494|MedGen:CN239457|MedGen:CN169374|MedGen:CN517202	LEPTIN RECEPTOR POLYMORPHISM|Obesity due to leptin receptor gene deficiency|Monogenic Non-Syndromic Obesity|not specified|not provided	germline;unknown	germline	GRCh37	NC_000001.10	1	66036441	66036441	na	na	1p31.3	criteria provided, multiple submitters, no conflicts	8	-	N	ClinGen:CA119672,UniProtKB:P48357#VAR_002703,OMIM:601007.0004	3	8523	66036441	A	G	LEPR:NM_001198687:exon3:c.A326G:p.K109R,LEPR:NM_001198688:exon3:c.A326G:p.K109R,LEPR:NM_001198689:exon3:c.A326G:p.K109R,LEPR:NM_001003679:exon4:c.A326G:p.K109R,LEPR:NM_001003680:exon4:c.A326G:p.K109R,LEPR:NM_002303:exon4:c.A326G:p.K109R	0.321	benign	0.269	benign	0.99	pathogenic	0.851	pathogenic	2.255	pathogenic	0.0	benign	0.23	benign
LEPR	23563	single nucleotide variant	NM_002303.6(LEPR):c.1968G>C (p.Lys656Asn)	3953	LEPR	HGNC:6554	Benign/Likely benign	0	Oct 30, 2022	1805094	-	RCV000009050|RCV000266874|RCV000321944|RCV000712216|RCV000730960	|MedGen:CN239457|MONDO:MONDO:0013992,MedGen:C3554225,OMIM:614963,Orphanet:179494|MedGen:CN517202|MedGen:CN169374	LEPTIN RECEPTOR POLYMORPHISM|Monogenic Non-Syndromic Obesity|Obesity due to leptin receptor gene deficiency|not provided|not specified	germline;unknown	germline	GRCh37	NC_000001.10	1	66075952	66075952	na	na	1p31.3	criteria provided, multiple submitters, no conflicts	10	-	N	ClinGen:CA119681,UniProtKB:P48357#VAR_002706,OMIM:601007.0005	3	8524	66075952	G	C	LEPR:NM_001198687:exon13:c.G1968C:p.K656N,LEPR:NM_001198688:exon13:c.G1968C:p.K656N,LEPR:NM_001198689:exon13:c.G1968C:p.K656N,LEPR:NM_001003679:exon14:c.G1968C:p.K656N,LEPR:NM_001003680:exon14:c.G1968C:p.K656N,LEPR:NM_002303:exon14:c.G1968C:p.K656N	0.303	benign	0.101	benign	0.944	pathogenic	0.581	pathogenic	1.405	pathogenic	0.02	benign	0.41	benign
AMHR2	23668	single nucleotide variant	NM_020547.3(AMHR2):c.1217G>A (p.Arg406Gln)	269	AMHR2	HGNC:465	Likely pathogenic	1	Sep 23, 2022	137853104	-	RCV000009161|RCV002512932	MedGen:C3897940|MedGen:CN517202	Persistent mullerian duct syndrome, type II|not provided	germline	germline	GRCh37	NC_000012.11	12	53823691	53823691	na	na	12q13.13	criteria provided, single submitter	2	-	N	ClinGen:CA119789,UniProtKB:Q16671#VAR_015528,OMIM:600956.0004	3	8629	53823691	G	A	AMHR2:NM_001164690:exon9:c.G1217A:p.R406Q,AMHR2:NM_020547:exon9:c.G1217A:p.R406Q	0.123	benign	0.115	benign	0.084	benign	0.008	benign	0.945	pathogenic	0.9	pathogenic	-0.16	benign
GHR	23692	single nucleotide variant	NM_000163.5(GHR):c.508G>C (p.Asp170His)	2690	GHR	HGNC:4263	Pathogenic/Likely pathogenic	1	Dec 17, 2022	121909366	-	RCV000009185|RCV002508773	MONDO:MONDO:0009877,MedGen:C0271568,OMIM:262500,Orphanet:633|MedGen:CN517202	Laron-type isolated somatotropin defect|not provided	germline	germline	GRCh37	NC_000005.9	5	42699994	42699994	na	na	5p12	criteria provided, multiple submitters, no conflicts	4	-	N	ClinGen:CA119811,UniProtKB:P10912#VAR_002713,OMIM:600946.0021	3	8653	42699994	G	C	GHR:NM_001242460:exon4:c.G442C:p.D148H,GHR:NM_001242406:exon5:c.G508C:p.D170H,GHR:NM_001242462:exon5:c.G508C:p.D170H,GHR:NM_000163:exon6:c.G508C:p.D170H,GHR:NM_001242399:exon6:c.G529C:p.D177H,GHR:NM_001242402:exon6:c.G508C:p.D170H,GHR:NM_001242403:exon6:c.G508C:p.D170H,GHR:NM_001242404:exon6:c.G508C:p.D170H,GHR:NM_001242405:exon6:c.G508C:p.D170H,GHR:NM_001242400:exon7:c.G508C:p.D170H,GHR:NM_00124…	0.0	pathogenic	0.0	pathogenic	1.0	pathogenic	1.0	pathogenic	3.205	pathogenic	0.93	pathogenic	0.4	benign
GHR	23693	single nucleotide variant	NM_000163.5(GHR):c.512T>C (p.Ile171Thr)	2690	GHR	HGNC:4263	Likely pathogenic	1	Aug 16, 2023	121909367	-	RCV000009186|RCV003322747	MONDO:MONDO:0009877,MedGen:C0271568,OMIM:262500,Orphanet:633|MedGen:CN517202	Laron-type isolated somatotropin defect|not provided	germline	germline	GRCh37	NC_000005.9	5	42699998	42699998	na	na	5p12	criteria provided, single submitter	2	-	N	ClinGen:CA119812,UniProtKB:P10912#VAR_018431,OMIM:600946.0022	3	8654	42699998	T	C	GHR:NM_001242460:exon4:c.T446C:p.I149T,GHR:NM_001242406:exon5:c.T512C:p.I171T,GHR:NM_001242462:exon5:c.T512C:p.I171T,GHR:NM_000163:exon6:c.T512C:p.I171T,GHR:NM_001242399:exon6:c.T533C:p.I178T,GHR:NM_001242402:exon6:c.T512C:p.I171T,GHR:NM_001242403:exon6:c.T512C:p.I171T,GHR:NM_001242404:exon6:c.T512C:p.I171T,GHR:NM_001242405:exon6:c.T512C:p.I171T,GHR:NM_001242400:exon7:c.T512C:p.I171T,GHR:NM_00124…	0.0	pathogenic	0.001	pathogenic	1.0	pathogenic	0.996	pathogenic	2.955	pathogenic	0.84	pathogenic	0.26	benign
GHR	23697	single nucleotide variant	NM_000163.5(GHR):c.1630A>C (p.Ile544Leu)	2690	GHR	HGNC:4263	Benign	0	Nov 04, 2022	6180	-	RCV000009190|RCV000173652|RCV000392579|RCV001719693|RCV001701562	MONDO:MONDO:0007750,MedGen:C0745103,OMIM:143890,Orphanet:391665|MedGen:CN169374|MONDO:MONDO:0009877,MedGen:C0271568,OMIM:262500,Orphanet:633|MedGen:C3661900|MONDO:MONDO:0011420,MedGen:C1858656,OMIM:604271,Orphanet:314802,Orphanet:314811	Hypercholesterolemia, familial, 1|not specified|Laron-type isolated somatotropin defect|not provided|Short stature due to partial GHR deficiency	germline	germline	GRCh37	NC_000005.9	5	42719239	42719239	na	na	5p12	criteria provided, multiple submitters, no conflicts	10	-	N	ClinGen:CA200655,UniProtKB:P10912#VAR_013941,OMIM:600946.0028	3	8658	42719239	A	C	GHR:NM_001242460:exon8:c.A1564C:p.I522L,GHR:NM_001242406:exon9:c.A1630C:p.I544L,GHR:NM_000163:exon10:c.A1630C:p.I544L,GHR:NM_001242399:exon10:c.A1651C:p.I551L,GHR:NM_001242402:exon10:c.A1630C:p.I544L,GHR:NM_001242403:exon10:c.A1630C:p.I544L,GHR:NM_001242404:exon10:c.A1630C:p.I544L,GHR:NM_001242405:exon10:c.A1630C:p.I544L,GHR:NM_001242400:exon11:c.A1630C:p.I544L,GHR:NM_001242401:exon11:c.A1630C:p.…	0.009	pathogenic	0.126	benign	0.933	pathogenic	0.897	pathogenic	3.415	pathogenic	0.03	benign	1.3	benign
MRE11	23825	single nucleotide variant	NM_005591.4(MRE11):c.630G>C (p.Trp210Cys)	4361	MRE11	HGNC:7230	Pathogenic/Likely pathogenic	1	Nov 08, 2021	137852763	-	RCV000009331|RCV000712327	MONDO:MONDO:0024557,MedGen:C4012790,OMIM:604391,Orphanet:251347|MedGen:CN517202	Ataxia-telangiectasia-like disorder 1|not provided	germline;unknown	germline	GRCh37	NC_000011.9	11	94209484	94209484	na	na	11q21	criteria provided, multiple submitters, no conflicts	5	-	N	ClinGen:CA119930,OMIM:600814.0005	3	8786	94209484	C	G	MRE11:NM_001330347:exon7:c.G630C:p.W210C,MRE11:NM_005590:exon7:c.G630C:p.W210C,MRE11:NM_005591:exon7:c.G630C:p.W210C	0.0	pathogenic	0.0	pathogenic	1.0	pathogenic	1.0	pathogenic	3.06	pathogenic	1.0	pathogenic	-1.93	pathogenic
BMPR2	23838	single nucleotide variant	NM_001204.7(BMPR2):c.354T>G (p.Cys118Trp)	659	BMPR2	HGNC:1078	Pathogenic	1	Sep 17, 2022	137852743	-	RCV000009344|RCV001823865|RCV001851760	MONDO:MONDO:0024533,MedGen:C4552070,OMIM:178600,Orphanet:422|Human Phenotype Ontology:HP:0002092,Human Phenotype Ontology:HP:0006546,MONDO:MONDO:0015924,MeSH:D000081029,MedGen:C2973725,Orphanet:182090;MONDO:MONDO:0008347,MedGen:C5679820,Orphanet:422|MONDO:MONDO:0001999,MedGen:C0152171	Pulmonary hypertension, primary, 1|Pulmonary arterial hypertension;Idiopathic and/or familial pulmonary arterial hypertension|Primary pulmonary hypertension	germline	germline	GRCh37	NC_000002.11	2	203332348	203332348	na	na	2q33.1	criteria provided, single submitter	4	-	N	ClinGen:CA278075,UniProtKB:Q13873#VAR_013672,OMIM:600799.0005	3	8799	203332348	T	G	BMPR2:NM_001204:exon3:c.T354G:p.C118W	0.0	pathogenic	0.0	pathogenic	1.0	pathogenic	1.0	pathogenic	2.91	pathogenic	1.0	pathogenic	-9.43	pathogenic
BMPR2	23841	single nucleotide variant	NM_001204.7(BMPR2):c.1471C>T (p.Arg491Trp)	659	BMPR2	HGNC:1078	Pathogenic	1	Apr 11, 2023	137852746	-	RCV000009347|RCV000493405|RCV001003725|RCV001823867|RCV002512939|RCV003407308	MONDO:MONDO:0024533,MedGen:C4552070,OMIM:178600,Orphanet:422|MedGen:C3661900|Human Phenotype Ontology:HP:0002092,Human Phenotype Ontology:HP:0006546,MONDO:MONDO:0015924,MeSH:D000081029,MedGen:C2973725,Orphanet:182090|MONDO:MONDO:0008347,MedGen:C5679820,Orphanet:422;Human Phenotype Ontology:HP:0002092,Human Phenotype Ontology:HP:0006546,MONDO:MONDO:0015924,MeSH:D000081029,MedGen:C2973725,Orphanet:…	Pulmonary hypertension, primary, 1|not provided|Pulmonary arterial hypertension|Idiopathic and/or familial pulmonary arterial hypertension;Pulmonary arterial hypertension|Primary pulmonary hypertension|BMPR2-related condition	germline;unknown	germline	GRCh37	NC_000002.11	2	203417496	203417496	na	na	2q33.2	criteria provided, multiple submitters, no conflicts	9	-	N	ClinGen:CA278081,UniProtKB:Q13873#VAR_013681,OMIM:600799.0008	3	8802	203417496	C	T	BMPR2:NM_001204:exon11:c.C1471T:p.R491W	0.0	pathogenic	0.0	pathogenic	1.0	pathogenic	1.0	pathogenic	4.435	pathogenic	0.91	pathogenic	-5.66	pathogenic
BMPR2	23845	single nucleotide variant	NM_001204.7(BMPR2):c.1472G>A (p.Arg491Gln)	659	BMPR2	HGNC:1078	Pathogenic	1	Oct 14, 2021	137852749	-	RCV000009351|RCV001003726|RCV001823869|RCV001810840|RCV001851761|RCV003313915	MONDO:MONDO:0024533,MedGen:C4552070,OMIM:178600,Orphanet:422|Human Phenotype Ontology:HP:0002092,Human Phenotype Ontology:HP:0006546,MONDO:MONDO:0015924,MeSH:D000081029,MedGen:C2973725,Orphanet:182090|MONDO:MONDO:0008347,MedGen:C5679820,Orphanet:422;Human Phenotype Ontology:HP:0002092,Human Phenotype Ontology:HP:0006546,MONDO:MONDO:0015924,MeSH:D000081029,MedGen:C2973725,Orphanet:182090|MedGen:C3…	Pulmonary hypertension, primary, 1|Pulmonary arterial hypertension|Idiopathic and/or familial pulmonary arterial hypertension;Pulmonary arterial hypertension|not provided|Primary pulmonary hypertension|Pulmonary venoocclusive disease 1, autosomal dominant	germline;unknown	germline	GRCh37	NC_000002.11	2	203417497	203417497	na	na	2q33.2	criteria provided, multiple submitters, no conflicts	7	-	N	ClinGen:CA278089,UniProtKB:Q13873#VAR_013680,OMIM:600799.0013	3	8806	203417497	G	A	BMPR2:NM_001204:exon11:c.G1472A:p.R491Q	0.0	pathogenic	0.0	pathogenic	1.0	pathogenic	1.0	pathogenic	4.435	pathogenic	0.9	pathogenic	-5.64	pathogenic
MSH6	23970	single nucleotide variant	NM_000179.3(MSH6):c.2633T>C (p.Val878Ala)	2956	MSH6	HGNC:7329	Benign	0	Sep 05, 2013	2020912	-	RCV000009486|RCV000030264|RCV000034495|RCV000121581|RCV000148644|RCV000157763|RCV001080582|RCV001269491|RCV001353988|RCV001797998|RCV002490347	MONDO:MONDO:0013710,MedGen:C1833477,OMIM:614350,Orphanet:144|MONDO:MONDO:0005835,MedGen:C4552100,Orphanet:144|MedGen:C3661900|MedGen:CN169374|MedGen:CN221548|MONDO:MONDO:0015356,MeSH:D009386,MedGen:C0027672,Orphanet:140162|MeSH:D003123,MedGen:C0009405|MONDO:MONDO:0007254,MedGen:C0006142|MONDO:MONDO:0002032,MedGen:C0699790|MedGen:CN221562|MONDO:MONDO:0013710,MedGen:C1833477,OMIM:614350,Orphanet:14…	Lynch syndrome 5|Lynch syndrome|not provided|not specified|Colorectal / endometrial cancer|Hereditary cancer-predisposing syndrome|Hereditary nonpolyposis colorectal neoplasms|Malignant tumor of breast|Carcinoma of colon|Breast and/or ovarian cancer|Lynch syndrome 5;Endometrial carcinoma;Mismatch repair cancer syndrome 3	germline;unknown	germline	GRCh37	NC_000002.11	2	48027755	48027755	na	na	2p16.3	reviewed by expert panel	35	ACMG2013,ACMG2016,ACMG2021,ACMG2022	N	ClinGen:CA010638,UniProtKB:P52701#VAR_012964,OMIM:600678.0006	3	8931	48027755	T	C	MSH6:NM_001281492:exon2:c.T2243C:p.V748A,MSH6:NM_001281493:exon3:c.T1727C:p.V576A,MSH6:NM_000179:exon4:c.T2633C:p.V878A,MSH6:NM_001281494:exon4:c.T1727C:p.V576A	0.338	benign	0.415	benign	0.036	benign	0.026	benign	1.105	pathogenic	0.35	benign	-2.7	pathogenic
STAR	24032	single nucleotide variant	NM_000349.3(STAR):c.653C>T (p.Ala218Val)	6770	STAR	HGNC:11359	Pathogenic	1	Oct 01, 2022	137852690	-	RCV000009556|RCV001388088	MONDO:MONDO:0008725,MedGen:C0342474,OMIM:201710,Orphanet:418,Orphanet:90790|MedGen:CN517202	Congenital lipoid adrenal hyperplasia due to STAR deficency|not provided	germline	germline	GRCh37	NC_000008.10	8	38002831	38002831	na	na	8p11.23	criteria provided, multiple submitters, no conflicts	5	-	N	ClinGen:CA120040,UniProtKB:P49675#VAR_014239,OMIM:600617.0008	3	8993	38002831	G	A	STAR:NM_000349:exon6:c.C653T:p.A218V	0.003	pathogenic	0.006	pathogenic	0.993	pathogenic	0.463	benign	2.61	pathogenic	0.72	pathogenic	-1.31	benign
STAR	24034	single nucleotide variant	NM_000349.3(STAR):c.545G>A (p.Arg182His)	6770	STAR	HGNC:11359	Pathogenic/Likely pathogenic	1	May 09, 2022	104894086	-	RCV000009558|RCV000518086	MONDO:MONDO:0008725,MedGen:C0342474,OMIM:201710,Orphanet:418,Orphanet:90790|MedGen:CN517202	Congenital lipoid adrenal hyperplasia due to STAR deficency|not provided	germline;unknown	germline	GRCh37	NC_000008.10	8	38003586	38003586	na	na	8p11.23	criteria provided, multiple submitters, no conflicts	7	-	N	ClinGen:CA120041,OMIM:600617.0010	3	8995	38003586	C	T	STAR:NM_000349:exon5:c.G545A:p.R182H	0.0	pathogenic	0.002	pathogenic	1.0	pathogenic	1.0	pathogenic	3.035	pathogenic	0.89	pathogenic	-3.11	pathogenic
STAR	24035	single nucleotide variant	NM_000349.3(STAR):c.559G>A (p.Val187Met)	6770	STAR	HGNC:11359	Pathogenic/Likely pathogenic	1	Sep 01, 2021	104894089	-	RCV000009559|RCV000811531	MONDO:MONDO:0008725,MedGen:C0342474,OMIM:201710,Orphanet:418,Orphanet:90790|MedGen:CN517202	Congenital lipoid adrenal hyperplasia due to STAR deficency|not provided	germline;unknown	germline	GRCh37	NC_000008.10	8	38003572	38003572	na	na	8p11.23	criteria provided, multiple submitters, no conflicts	4	-	N	ClinGen:CA120043,OMIM:600617.0011	3	8996	38003572	C	T	STAR:NM_000349:exon5:c.G559A:p.V187M	0.001	pathogenic	0.002	pathogenic	0.998	pathogenic	0.937	pathogenic	2.93	pathogenic	0.73	pathogenic	-1.66	pathogenic
STAR	24036	single nucleotide variant	NM_000349.3(STAR):c.562C>T (p.Arg188Cys)	6770	STAR	HGNC:11359	Pathogenic	1	Feb 14, 2023	104894090	-	RCV000009560|RCV000812202	MONDO:MONDO:0008725,MedGen:C0342474,OMIM:201710,Orphanet:418,Orphanet:90790|MedGen:CN517202	Congenital lipoid adrenal hyperplasia due to STAR deficency|not provided	germline;unknown	germline	GRCh37	NC_000008.10	8	38003569	38003569	na	na	8p11.23	criteria provided, multiple submitters, no conflicts	9	-	N	ClinGen:CA120045,OMIM:600617.0012	3	8997	38003569	G	A	STAR:NM_000349:exon5:c.C562T:p.R188C	0.0	pathogenic	0.0	pathogenic	0.987	pathogenic	0.813	pathogenic	2.93	pathogenic	0.73	pathogenic	-2.57	pathogenic
GATA4	24069	single nucleotide variant	NM_001308093.3(GATA4):c.889G>A (p.Gly297Ser)	2626	GATA4	HGNC:4173	Pathogenic	1	Nov 23, 2020	104894073	-	RCV000009596|RCV001775066	MONDO:MONDO:0011938,MedGen:C1842778,OMIM:607941,Orphanet:1478|Human Phenotype Ontology:HP:0001669,MONDO:MONDO:0000153,MedGen:C0040761,Orphanet:216675	Atrial septal defect 2|Transposition of the great arteries	germline	germline	GRCh37	NC_000008.10	8	11607722	11607722	na	na	8p23.1	criteria provided, single submitter	2	-	N	ClinGen:CA212661,UniProtKB:P43694#VAR_016204,OMIM:600576.0001	3	9030	11607722	G	A	GATA4:NM_001308093:exon3:c.G889A:p.G297S,GATA4:NM_001308094:exon4:c.G268A:p.G90S,GATA4:NM_002052:exon4:c.G886A:p.G296S	0.0	pathogenic	0.0	pathogenic	1.0	pathogenic	1.0	pathogenic	3.93	pathogenic	0.96	pathogenic	-6.95	pathogenic
BRCA2	24368	single nucleotide variant	NM_000059.4(BRCA2):c.1114A>C (p.Asn372His)	675	BRCA2	HGNC:1101	Benign	0	Jan 12, 2015	144848	-	RCV000009916|RCV000034427|RCV000130720|RCV000120303|RCV000207052|RCV000320173|RCV000260146|RCV000468776|RCV000768560|RCV002476952	MONDO:MONDO:0012933,MedGen:C2675520,OMIM:612555,Orphanet:145|MedGen:C3661900|MONDO:MONDO:0015356,MeSH:D009386,MedGen:C0027672,Orphanet:140162|MedGen:CN169374|MedGen:C1527349|MONDO:MONDO:0003582,MeSH:D061325,MedGen:C0677776,Orphanet:145|MONDO:MONDO:0011584,MedGen:C1838457,OMIM:605724,Orphanet:319462|MONDO:MONDO:0016419,MedGen:C0346153,OMIM:114480,Orphanet:227535|Human Phenotype Ontology:HP:0003002…	Breast-ovarian cancer, familial, susceptibility to, 2|not provided|Hereditary cancer-predisposing syndrome|not specified|Ductal breast carcinoma|Hereditary breast ovarian cancer syndrome|Fanconi anemia complementation group D1|Familial cancer of breast|Breast carcinoma|8 conditions	germline;unknown	germline	GRCh37	NC_000013.10	13	32906729	32906729	na	na	13q13.1	reviewed by expert panel	36	ACMG2013,ACMG2016,ACMG2021,ACMG2022	N	ClinGen:CA010835,OMIM:600185.0013	3	9329	32906729	A	C	BRCA2:NM_000059:exon10:c.A1114C:p.N372H	0.139	benign	0.335	benign	-	-	-	-	-	-	0.01	benign	5.79	benign
BRCA2	24379	single nucleotide variant	NM_000059.4(BRCA2):c.8165C>G (p.Thr2722Arg)	675	BRCA2	HGNC:1101	Pathogenic	1	Aug 10, 2015	80359062	-	RCV000031723|RCV000163026|RCV000405476|RCV000414368|RCV001193120	MONDO:MONDO:0012933,MedGen:C2675520,OMIM:612555,Orphanet:145|MONDO:MONDO:0015356,MeSH:D009386,MedGen:C0027672,Orphanet:140162|MedGen:CN239275|MedGen:C3661900|MONDO:MONDO:0003582,MeSH:D061325,MedGen:C0677776,Orphanet:145	Breast-ovarian cancer, familial, susceptibility to, 2|Hereditary cancer-predisposing syndrome|BRCA2-Related Disorders|not provided|Hereditary breast ovarian cancer syndrome	germline	germline	GRCh37	NC_000013.10	13	32937504	32937504	na	na	13q13.1	reviewed by expert panel	16	ACMG2013,ACMG2016,ACMG2021,ACMG2022	N	ClinGen:CA025480,OMIM:600185.0025	3	9340	32937504	C	G	BRCA2:NM_000059:exon18:c.C8165G:p.T2722R	0.0	pathogenic	0.0	pathogenic	1.0	pathogenic	1.0	pathogenic	3.81	pathogenic	1.0	pathogenic	-1.78	pathogenic
BRCA2	24384	single nucleotide variant	NM_000059.4(BRCA2):c.7529T>C (p.Leu2510Pro)	675	BRCA2	HGNC:1101	Pathogenic	1	Jul 13, 2023	80358979	-	RCV000009936|RCV000113772|RCV000478444|RCV000509658|RCV001290186	MONDO:MONDO:0011584,MedGen:C1838457,OMIM:605724,Orphanet:319462|MONDO:MONDO:0012933,MedGen:C2675520,OMIM:612555,Orphanet:145|MedGen:C3661900|MONDO:MONDO:0015356,MeSH:D009386,MedGen:C0027672,Orphanet:140162|MONDO:MONDO:0003582,MeSH:D061325,MedGen:C0677776,Orphanet:145	Fanconi anemia complementation group D1|Breast-ovarian cancer, familial, susceptibility to, 2|not provided|Hereditary cancer-predisposing syndrome|Hereditary breast ovarian cancer syndrome	germline	germline	GRCh37	NC_000013.10	13	32930658	32930658	na	na	13q13.1	criteria provided, multiple submitters, no conflicts	6	ACMG2013,ACMG2016,ACMG2021,ACMG2022	N	ClinGen:CA025134,OMIM:600185.0030	3	9345	32930658	T	C	BRCA2:NM_000059:exon15:c.T7529C:p.L2510P	0.0	pathogenic	0.0	pathogenic	1.0	pathogenic	1.0	pathogenic	2.965	pathogenic	0.98	pathogenic	-2.89	pathogenic
SRY	24778	single nucleotide variant	NM_003140.3(SRY):c.178G>C (p.Val60Leu)	6736	SRY	HGNC:11311	Pathogenic	1	May 24, 2022	104894957	-	RCV000010392|RCV002460889	MONDO:MONDO:0020712,MedGen:C2748896,OMIM:400044,Orphanet:242|MedGen:CN517202	46,XY sex reversal 1|not provided	germline	germline	GRCh37	NC_000024.9	Y	2655467	2655467	na	na	Yp11.2	criteria provided, single submitter	2	-	N	ClinGen:CA254866,UniProtKB:Q05066#VAR_003719,OMIM:480000.0004	3	9739	2655467	C	G	SRY:NM_003140:exon1:c.G178C:p.V60L	0.001	pathogenic	0.003	pathogenic	0.82	pathogenic	0.883	pathogenic	3.74	pathogenic	0.75	pathogenic	-5.66	pathogenic
SRY	24785	single nucleotide variant	NM_003140.3(SRY):c.203T>C (p.Ile68Thr)	6736	SRY	HGNC:11311	Pathogenic	1	Sep 01, 2021	104894968	-	RCV000010400	MONDO:MONDO:0020712,MedGen:C2748896,OMIM:400044,Orphanet:242	46,XY sex reversal 1	germline	germline	GRCh37	NC_000024.9	Y	2655442	2655442	na	na	Yp11.2	criteria provided, single submitter	2	-	N	ClinGen:CA254874,UniProtKB:Q05066#VAR_003722,OMIM:480000.0011	3	9746	2655442	A	G	SRY:NM_003140:exon1:c.T203C:p.I68T	0.001	pathogenic	0.001	pathogenic	0.594	pathogenic	0.7	pathogenic	2.72	pathogenic	0.87	pathogenic	-4.82	pathogenic
AR	24843	single nucleotide variant	NM_000044.6(AR):c.2323C>T (p.Arg775Cys)	367	AR	HGNC:644	Pathogenic	1	Dec 16, 2021	137852562	-	RCV000010478|RCV001056795|RCV001818149	MONDO:MONDO:0019154,MedGen:C0039585,OMIM:300068,Orphanet:754,Orphanet:99429|MONDO:MONDO:0019154,MedGen:C0039585,OMIM:300068,Orphanet:754,Orphanet:99429;MONDO:MONDO:0010735,MedGen:C1839259,OMIM:313200,Orphanet:481|MedGen:C3661900	Androgen resistance syndrome|Androgen resistance syndrome;Kennedy disease|not provided	germline	germline	GRCh37	NC_000023.10	X	66941679	66941679	na	na	Xq12	criteria provided, multiple submitters, no conflicts	5	-	N	ClinGen:CA120701,UniProtKB:P10275#VAR_004709,OMIM:313700.0003,OMIM:313700.0010	3	9804	66941679	C	T	AR:NM_000044:exon6:c.C2323T:p.R775C,AR:NM_001011645:exon7:c.C727T:p.R243C	0.0	pathogenic	0.0	pathogenic	-	-	-	-	-	-	0.94	pathogenic	-4.13	pathogenic
AR	24845	single nucleotide variant	NM_000044.6(AR):c.2599G>A (p.Val867Met)	367	AR	HGNC:644	Pathogenic	1	Jan 19, 2023	137852564	-	RCV000010480|RCV000763628|RCV001381188|RCV003421916	MONDO:MONDO:0019154,MedGen:C0039585,OMIM:300068,Orphanet:754,Orphanet:99429|MONDO:MONDO:0010720,MedGen:C0268301,OMIM:312300,Orphanet:90797;Human Phenotype Ontology:HP:0012125,MONDO:MONDO:0008315,MedGen:C0376358,OMIM:176807,Orphanet:1331;MONDO:MONDO:0010735,MedGen:C1839259,OMIM:313200,Orphanet:481;MONDO:MONDO:0010384,MedGen:C2678098,OMIM:300633,Orphanet:440;MONDO:MONDO:0019154,MedGen:C0039585,OMIM…	Androgen resistance syndrome|Partial androgen insensitivity syndrome;Malignant tumor of prostate;Kennedy disease;Hypospadias 1, X-linked;Androgen resistance syndrome|Kennedy disease;Androgen resistance syndrome|AR-related condition	germline;unknown	germline	GRCh37	NC_000023.10	X	66942818	66942818	na	na	Xq12	criteria provided, multiple submitters, no conflicts	6	-	N	ClinGen:CA120683,UniProtKB:P10275#VAR_004730,OMIM:313700.0005,OMIM:313700.0017	3	9806	66942818	G	A	AR:NM_000044:exon7:c.G2599A:p.V867M,AR:NM_001011645:exon8:c.G1003A:p.V335M	0.635	benign	0.401	benign	-	-	-	-	-	-	0.62	pathogenic	-6.73	pathogenic
AR	24852	single nucleotide variant	NM_000044.6(AR):c.1789G>A (p.Ala597Thr)	367	AR	HGNC:644	Pathogenic	1	Jul 14, 2021	137852569	-	RCV000010487|RCV000640478|RCV001269612	MONDO:MONDO:0010720,MedGen:C0268301,OMIM:312300,Orphanet:90797|MONDO:MONDO:0019154,MedGen:C0039585,OMIM:300068,Orphanet:754,Orphanet:99429;MONDO:MONDO:0010735,MedGen:C1839259,OMIM:313200,Orphanet:481|MedGen:CN517202	Partial androgen insensitivity syndrome|Androgen resistance syndrome;Kennedy disease|not provided	germline	germline	GRCh37	NC_000023.10	X	66905872	66905872	na	na	Xq12	criteria provided, multiple submitters, no conflicts	3	-	N	ClinGen:CA120703,UniProtKB:P10275#VAR_009743,OMIM:313700.0011	3	9813	66905872	G	A	AR:NM_001348064:exon2:c.G1706A:p.R569H,AR:NM_000044:exon3:c.G1789A:p.A597T,AR:NM_001348061:exon3:c.G1789A:p.A597T,AR:NM_001348063:exon3:c.G1789A:p.A597T,AR:NM_001011645:exon4:c.G193A:p.A65T	0.0	pathogenic	0.001	pathogenic	-	-	-	-	-	-	1.0	pathogenic	-4.29	pathogenic
AR	24856	single nucleotide variant	NM_000044.6(AR):c.2191G>A (p.Val731Met)	367	AR	HGNC:644	Pathogenic	1	May 04, 2022	137852571	-	RCV000010491|RCV002247310	MedGen:C4015779|Human Phenotype Ontology:HP:0012125,MONDO:MONDO:0008315,MedGen:C0376358,OMIM:176807,Orphanet:1331	Prostate cancer, somatic|Malignant tumor of prostate	germline;somatic	germline/somatic	GRCh37	NC_000023.10	X	66937337	66937337	na	na	Xq12	criteria provided, single submitter	2	-	N	ClinGen:CA120709,UniProtKB:P10275#VAR_004695,OMIM:313700.0013	3	9817	66937337	G	A	AR:NM_000044:exon5:c.G2191A:p.V731M,AR:NM_001011645:exon6:c.G595A:p.V199M	0.011	pathogenic	0.035	pathogenic	-	-	-	-	-	-	0.39	benign	-4.08	pathogenic
AR	24858	single nucleotide variant	NM_000044.6(AR):c.2324G>A (p.Arg775His)	367	AR	HGNC:644	Pathogenic	1	Jul 29, 2022	137852572	-	RCV000010493|RCV001384255|RCV001781214	MONDO:MONDO:0019154,MedGen:C0039585,OMIM:300068,Orphanet:754,Orphanet:99429|MONDO:MONDO:0010735,MedGen:C1839259,OMIM:313200,Orphanet:481;MONDO:MONDO:0019154,MedGen:C0039585,OMIM:300068,Orphanet:754,Orphanet:99429|MedGen:CN517202	Androgen resistance syndrome|Kennedy disease;Androgen resistance syndrome|not provided	germline	germline	GRCh37	NC_000023.10	X	66941680	66941680	na	na	Xq12	criteria provided, multiple submitters, no conflicts	3	-	N	ClinGen:CA120712,UniProtKB:P10275#VAR_004708,OMIM:313700.0015	3	9819	66941680	G	A	AR:NM_000044:exon6:c.G2324A:p.R775H,AR:NM_001011645:exon7:c.G728A:p.R243H	0.0	pathogenic	0.001	pathogenic	-	-	-	-	-	-	0.87	pathogenic	-4.07	pathogenic
AR	24859	single nucleotide variant	NM_000044.6(AR):c.1823G>A (p.Arg608Gln)	367	AR	HGNC:644	Pathogenic/Likely pathogenic	1	Sep 17, 2021	137852573	-	RCV000010494|RCV000382955|RCV000806067	MONDO:MONDO:0010720,MedGen:C0268301,OMIM:312300,Orphanet:90797|MedGen:CN517202|MONDO:MONDO:0019154,MedGen:C0039585,OMIM:300068,Orphanet:754,Orphanet:99429;MONDO:MONDO:0010735,MedGen:C1839259,OMIM:313200,Orphanet:481	Partial androgen insensitivity syndrome|not provided|Androgen resistance syndrome;Kennedy disease	germline	germline	GRCh37	NC_000023.10	X	66905906	66905906	na	na	Xq12	criteria provided, multiple submitters, no conflicts	4	-	N	ClinGen:CA120715,UniProtKB:P10275#VAR_004684,OMIM:313700.0016	3	9820	66905906	G	A	AR:NM_000044:exon3:c.G1823A:p.R608Q,AR:NM_001348061:exon3:c.G1823A:p.R608Q,AR:NM_001348063:exon3:c.G1823A:p.R608Q,AR:NM_001011645:exon4:c.G227A:p.R76Q	0.0	pathogenic	0.002	pathogenic	-	-	-	-	-	-	0.97	pathogenic	-4.28	pathogenic
AR	24862	single nucleotide variant	NM_000044.6(AR):c.2567G>A (p.Arg856His)	367	AR	HGNC:644	Pathogenic	1	Mar 01, 2022	9332971	-	RCV000010497|RCV000532628|RCV000582251	MONDO:MONDO:0010720,MedGen:C0268301,OMIM:312300,Orphanet:90797|MONDO:MONDO:0019154,MedGen:C0039585,OMIM:300068,Orphanet:754,Orphanet:99429;MONDO:MONDO:0010735,MedGen:C1839259,OMIM:313200,Orphanet:481|MONDO:MONDO:0019154,MedGen:C0039585,OMIM:300068,Orphanet:754,Orphanet:99429	Partial androgen insensitivity syndrome|Androgen resistance syndrome;Kennedy disease|Androgen resistance syndrome	germline	germline	GRCh37	NC_000023.10	X	66942786	66942786	na	na	Xq12	criteria provided, single submitter	3	-	N	ClinGen:CA120721,UniProtKB:P10275#VAR_004726,OMIM:313700.0019,OMIM:313700.0040	3	9823	66942786	G	A	AR:NM_000044:exon7:c.G2567A:p.R856H,AR:NM_001011645:exon8:c.G971A:p.R324H	0.005	pathogenic	0.0	pathogenic	-	-	-	-	-	-	0.81	pathogenic	-5.25	pathogenic
AR	24868	single nucleotide variant	NM_000044.6(AR):c.2522G>A (p.Arg841His)	367	AR	HGNC:644	Pathogenic	1	Aug 13, 2021	9332969	-	RCV000010503|RCV000582333|RCV000814875|RCV001269861	MONDO:MONDO:0010720,MedGen:C0268301,OMIM:312300,Orphanet:90797|MONDO:MONDO:0019154,MedGen:C0039585,OMIM:300068,Orphanet:754,Orphanet:99429|MONDO:MONDO:0019154,MedGen:C0039585,OMIM:300068,Orphanet:754,Orphanet:99429;MONDO:MONDO:0010735,MedGen:C1839259,OMIM:313200,Orphanet:481|MedGen:CN517202	Partial androgen insensitivity syndrome|Androgen resistance syndrome|Androgen resistance syndrome;Kennedy disease|not provided	germline;unknown	germline	GRCh37	NC_000023.10	X	66942741	66942741	na	na	Xq12	criteria provided, multiple submitters, no conflicts	6	-	N	ClinGen:CA120731,UniProtKB:P10275#VAR_004723,OMIM:313700.0025	3	9829	66942741	G	A	AR:NM_000044:exon7:c.G2522A:p.R841H,AR:NM_001011645:exon8:c.G926A:p.R309H	0.015	pathogenic	0.051	benign	-	-	-	-	-	-	0.91	pathogenic	-4.12	pathogenic
AR	24869	single nucleotide variant	NM_000044.6(AR):c.2521C>T (p.Arg841Cys)	367	AR	HGNC:644	Pathogenic	1	Oct 25, 2022	137852577	-	RCV000010504|RCV000010529|RCV000640474|RCV001269809	MONDO:MONDO:0010720,MedGen:C0268301,OMIM:312300,Orphanet:90797|MONDO:MONDO:0019154,MedGen:C0039585,OMIM:300068,Orphanet:754,Orphanet:99429|MONDO:MONDO:0019154,MedGen:C0039585,OMIM:300068,Orphanet:754,Orphanet:99429;MONDO:MONDO:0010735,MedGen:C1839259,OMIM:313200,Orphanet:481|MedGen:CN517202	Partial androgen insensitivity syndrome|Androgen resistance syndrome|Androgen resistance syndrome;Kennedy disease|not provided	germline	germline	GRCh37	NC_000023.10	X	66942740	66942740	na	na	Xq12	criteria provided, multiple submitters, no conflicts	5	-	N	ClinGen:CA120734,UniProtKB:P10275#VAR_004721,OMIM:313700.0026,OMIM:313700.0054	3	9830	66942740	C	T	AR:NM_000044:exon7:c.C2521T:p.R841C,AR:NM_001011645:exon8:c.C925T:p.R309C	0.0	pathogenic	0.0	pathogenic	-	-	-	-	-	-	0.97	pathogenic	-4.16	pathogenic
AR	24886	single nucleotide variant	NM_000044.6(AR):c.2423T>C (p.Met808Thr)	367	AR	HGNC:644	Likely pathogenic	1	Jul 05, 2022	137852592	-	RCV000010521|RCV003133116	MONDO:MONDO:0010720,MedGen:C0268301,OMIM:312300,Orphanet:90797|MedGen:CN517202	Partial androgen insensitivity syndrome|not provided	germline	germline	GRCh37	NC_000023.10	X	66941779	66941779	na	na	Xq12	criteria provided, single submitter	2	-	N	ClinGen:CA120777,UniProtKB:P10275#VAR_009827,OMIM:313700.0044	3	9847	66941779	T	C	AR:NM_000044:exon6:c.T2423C:p.M808T,AR:NM_001011645:exon7:c.T827C:p.M276T	0.001	pathogenic	0.002	pathogenic	-	-	-	-	-	-	0.97	pathogenic	-6.94	pathogenic
AR	24888	single nucleotide variant	NM_000044.6(AR):c.2180G>T (p.Arg727Leu)	367	AR	HGNC:644	Pathogenic	1	May 04, 2022	137852593	-	RCV000010523|RCV002247312	MedGen:C3469524|Human Phenotype Ontology:HP:0012125,MONDO:MONDO:0008315,MedGen:C0376358,OMIM:176807,Orphanet:1331	Prostate cancer susceptibility|Malignant tumor of prostate	germline	germline	GRCh37	NC_000023.10	X	66937326	66937326	na	na	Xq12	criteria provided, single submitter	2	-	N	ClinGen:CA120780,UniProtKB:P10275#VAR_009789,OMIM:313700.0047	3	9849	66937326	G	T	AR:NM_000044:exon5:c.G2180T:p.R727L,AR:NM_001011645:exon6:c.G584T:p.R195L	0.0	pathogenic	0.001	pathogenic	-	-	-	-	-	-	0.79	pathogenic	-4.21	pathogenic
AR	24896	single nucleotide variant	NM_000044.6(AR):c.2231G>T (p.Gly744Val)	367	AR	HGNC:644	Pathogenic	1	Sep 01, 2021	137852600	-	RCV000010531|RCV000010532|RCV001851781	MONDO:MONDO:0010720,MedGen:C0268301,OMIM:312300,Orphanet:90797|MONDO:MONDO:0019154,MedGen:C0039585,OMIM:300068,Orphanet:754,Orphanet:99429|MONDO:MONDO:0019154,MedGen:C0039585,OMIM:300068,Orphanet:754,Orphanet:99429;MONDO:MONDO:0010735,MedGen:C1839259,OMIM:313200,Orphanet:481	Partial androgen insensitivity syndrome|Androgen resistance syndrome|Androgen resistance syndrome;Kennedy disease	germline	germline	GRCh37	NC_000023.10	X	66937377	66937377	na	na	Xq12	criteria provided, single submitter	2	-	N	ClinGen:CA120786,UniProtKB:P10275#VAR_004699,OMIM:313700.0056	3	9857	66937377	G	T	AR:NM_000044:exon5:c.G2231T:p.G744V,AR:NM_001011645:exon6:c.G635T:p.G212V	0.008	pathogenic	0.005	pathogenic	-	-	-	-	-	-	0.9	pathogenic	-6.6	pathogenic
AR	24900	single nucleotide variant	NM_000044.6(AR):c.1937C>A (p.Ala646Asp)	367	AR	HGNC:644	Benign/Likely benign	1	Nov 01, 2022	1800053	-	RCV000010536|RCV000613283|RCV000824699|RCV000995934|RCV002512959	MONDO:MONDO:0010720,MedGen:C0268301,OMIM:312300,Orphanet:90797|MedGen:CN169374|MONDO:MONDO:0018702,MedGen:C4552543,Orphanet:457077|MedGen:C3661900|MONDO:MONDO:0010735,MedGen:C1839259,OMIM:313200,Orphanet:481;MONDO:MONDO:0019154,MedGen:C0039585,OMIM:300068,Orphanet:754,Orphanet:99429	Partial androgen insensitivity syndrome|not specified|Castleman-Kojima disease|not provided|Kennedy disease;Androgen resistance syndrome	germline	germline	GRCh37	NC_000023.10	X	66931295	66931295	na	na	Xq12	criteria provided, multiple submitters, no conflicts	8	-	N	ClinGen:CA120795,UniProtKB:P10275#VAR_004686,OMIM:313700.0060	3	9861	66931295	C	A	AR:NM_000044:exon4:c.C1937A:p.A646D,AR:NM_001011645:exon5:c.C341A:p.A114D	0.035	pathogenic	0.339	benign	-	-	-	-	-	-	0.12	benign	-2.38	pathogenic
SHOX	24917	single nucleotide variant	NM_000451.4(SHOX):c.517C>T (p.Arg173Cys)	6473	SHOX	HGNC:10853	Pathogenic	1	Jan 07, 2023	137852556	-	RCV000010554|RCV000394044	MONDO:MONDO:0007481,MedGen:C0265309,OMIM:127300,Orphanet:240|MedGen:C3661900	Leri-Weill dyschondrosteosis|not provided	de novo;germline	germline	GRCh37	NC_000023.10	X	601586	601586	na	na	Xp22.33;Yp11.2	criteria provided, multiple submitters, no conflicts	4	-	N	ClinGen:CA254920,UniProtKB:O15266#VAR_012346,OMIM:312865.0007	3	9878	601586	C	T	SHOX:NM_000451:exon4:c.C517T:p.R173C,SHOX:NM_006883:exon4:c.C517T:p.R173C	0.0	pathogenic	0.0	pathogenic	1.0	pathogenic	1.0	pathogenic	4.84	pathogenic	-	-	-4.48	pathogenic
F8	25137	single nucleotide variant	NM_000132.4(F8):c.6683G>A (p.Arg2228Gln)	2157	F8	HGNC:3546	Pathogenic	1	May 01, 2021	137852358	-	RCV000010810|RCV000852189	MONDO:MONDO:0010602,MedGen:C0019069,OMIM:306700,Orphanet:98878|MONDO:MONDO:0010604,MeSH:D002836,MedGen:C0008533,OMIM:306900,Orphanet:98879	Hereditary factor VIII deficiency disease|Hereditary factor IX deficiency disease	germline;unknown	germline	GRCh37	NC_000023.10	X	154090033	154090033	na	na	Xq28	criteria provided, multiple submitters, no conflicts	3	-	N	ClinGen:CA255016,UniProtKB:P00451#VAR_001203,OMIM:300841.0014	3	10098	154090033	C	T	F8:NM_019863:exon3:c.G278A:p.R93Q,F8:NM_000132:exon24:c.G6683A:p.R2228Q	0.0	pathogenic	0.0	pathogenic	1.0	pathogenic	1.0	pathogenic	3.985	pathogenic	0.9	pathogenic	-4.97	pathogenic
F8	25149	single nucleotide variant	NM_000132.4(F8):c.5879G>A (p.Arg1960Gln)	2157	F8	HGNC:3546	Pathogenic/Likely pathogenic	1	Jul 08, 2021	28937294	-	RCV000010822|RCV000756109	MONDO:MONDO:0010602,MedGen:C0019069,OMIM:306700,Orphanet:98878|MedGen:CN517202	Hereditary factor VIII deficiency disease|not provided	germline	germline	GRCh37	NC_000023.10	X	154132300	154132300	na	na	Xq28	criteria provided, multiple submitters, no conflicts	3	-	N	ClinGen:CA255019,UniProtKB:P00451#VAR_001170,OMIM:300841.0026	3	10110	154132300	C	T	F8:NM_000132:exon18:c.G5879A:p.R1960Q	0.021	pathogenic	0.008	pathogenic	1.0	pathogenic	0.999	pathogenic	2.175	pathogenic	0.79	pathogenic	-6.36	pathogenic
F8	25150	single nucleotide variant	NM_000132.4(F8):c.1172G>A (p.Arg391His)	2157	F8	HGNC:3546	Pathogenic	1	Nov 05, 2019	28935499	-	RCV000010823|RCV000757254|RCV000852002	|MONDO:MONDO:0010602,MedGen:C0019069,OMIM:306700,Orphanet:98878|MONDO:MONDO:0010604,MeSH:D002836,MedGen:C0008533,OMIM:306900,Orphanet:98879	FACTOR VIII (OKAYAMA)|Hereditary factor VIII deficiency disease|Hereditary factor IX deficiency disease	germline;unknown	germline	GRCh37	NC_000023.10	X	154194800	154194800	na	na	Xq28	criteria provided, multiple submitters, no conflicts	4	-	N	ClinGen:CA120918,UniProtKB:P00451#VAR_001090,OMIM:300841.0027	3	10111	154194800	C	T	F8:NM_000132:exon8:c.G1172A:p.R391H	0.013	pathogenic	0.0	pathogenic	1.0	pathogenic	0.998	pathogenic	3.07	pathogenic	0.91	pathogenic	-5.16	pathogenic
F8	25153	single nucleotide variant	NM_000132.4(F8):c.5122C>T (p.Arg1708Cys)	2157	F8	HGNC:3546	Pathogenic	1	Nov 20, 2020	111033613	-	RCV000010827|RCV000010826|RCV001092277	|MONDO:MONDO:0010602,MedGen:C0019069,OMIM:306700,Orphanet:98878|MedGen:C3661900	FACTOR VIII (EAST HARTFORD)|Hereditary factor VIII deficiency disease|not provided	germline;unknown	germline	GRCh37	NC_000023.10	X	154156943	154156943	na	na	Xq28	criteria provided, multiple submitters, no conflicts	7	-	N	ClinGen:CA120919,UniProtKB:P00451#VAR_001140,OMIM:300841.0030	3	10114	154156943	G	A	F8:NM_000132:exon14:c.C5122T:p.R1708C	0.0	pathogenic	0.001	pathogenic	1.0	pathogenic	1.0	pathogenic	2.11	pathogenic	0.93	pathogenic	-5.82	pathogenic
F8	25154	single nucleotide variant	NM_000132.4(F8):c.5096A>T (p.Tyr1699Phe)	2157	F8	HGNC:3546	Pathogenic	1	Jun 28, 2022	28935203	-	RCV000010828|RCV002508187	MONDO:MONDO:0010602,MedGen:C0019069,OMIM:306700,Orphanet:98878|MedGen:CN517202	Hereditary factor VIII deficiency disease|not provided	germline	germline	GRCh37	NC_000023.10	X	154156969	154156969	na	na	Xq28	criteria provided, multiple submitters, no conflicts	4	-	N	ClinGen:CA255022,UniProtKB:P00451#VAR_001139,OMIM:300841.0031	3	10115	154156969	T	A	F8:NM_000132:exon14:c.A5096T:p.Y1699F	0.036	pathogenic	0.031	pathogenic	0.999	pathogenic	0.973	pathogenic	2.11	pathogenic	0.83	pathogenic	-5.63	pathogenic
F8	25164	single nucleotide variant	NM_000132.4(F8):c.1171C>T (p.Arg391Cys)	2157	F8	HGNC:3546	Pathogenic	1	Oct 26, 2021	137852364	-	RCV000010838	MONDO:MONDO:0010602,MedGen:C0019069,OMIM:306700,Orphanet:98878	Hereditary factor VIII deficiency disease	germline	germline	GRCh37	NC_000023.10	X	154194801	154194801	na	na	Xq28	criteria provided, single submitter	2	-	N	ClinGen:CA255026,UniProtKB:P00451#VAR_001089,OMIM:300841.0041	3	10125	154194801	G	A	F8:NM_000132:exon8:c.C1171T:p.R391C	0.0	pathogenic	0.0	pathogenic	1.0	pathogenic	0.999	pathogenic	3.07	pathogenic	0.98	pathogenic	-5.18	pathogenic
F8	25165	single nucleotide variant	NM_000132.4(F8):c.6977G>A (p.Arg2326Gln)	2157	F8	HGNC:3546	Pathogenic/Likely pathogenic	1	May 03, 2020	137852360	-	RCV000010839|RCV000851861|RCV001169905	MONDO:MONDO:0010602,MedGen:C0019069,OMIM:306700,Orphanet:98878|MONDO:MONDO:0010604,MeSH:D002836,MedGen:C0008533,OMIM:306900,Orphanet:98879|MedGen:CN517202	Hereditary factor VIII deficiency disease|Hereditary factor IX deficiency disease|not provided	germline;unknown	germline	GRCh37	NC_000023.10	X	154065951	154065951	na	na	Xq28	criteria provided, multiple submitters, no conflicts	5	-	N	ClinGen:CA255027,UniProtKB:P00451#VAR_001212,OMIM:300841.0042	3	10126	154065951	C	T	F8:NM_019863:exon5:c.G572A:p.R191Q,F8:NM_000132:exon26:c.G6977A:p.R2326Q	0.0	pathogenic	0.0	pathogenic	1.0	pathogenic	1.0	pathogenic	3.64	pathogenic	0.83	pathogenic	-5.38	pathogenic
F8	25195	single nucleotide variant	NM_000132.4(F8):c.121G>T (p.Gly41Cys)	2157	F8	HGNC:3546	Pathogenic	1	May 04, 2022	137852379	-	RCV000010869|RCV002247317	MONDO:MONDO:0010602,MedGen:C0019069,OMIM:306700,Orphanet:98878|MONDO:MONDO:0859082,MedGen:C5676879,OMIM:301071	Hereditary factor VIII deficiency disease|Thrombophilia, X-linked, due to factor 8 defect	germline	germline	GRCh37	NC_000023.10	X	154250707	154250707	na	na	Xq28	criteria provided, single submitter	2	-	N	ClinGen:CA255048,UniProtKB:P00451#VAR_001047,OMIM:300841.0073	3	10156	154250707	C	A	F8:NM_000132:exon1:c.G121T:p.G41C	0.004	pathogenic	0.089	benign	0.985	pathogenic	0.548	pathogenic	1.545	pathogenic	0.16	benign	-5.27	pathogenic
F8	25206	single nucleotide variant	NM_000132.4(F8):c.323A>C (p.Lys108Thr)	2157	F8	HGNC:3546	Pathogenic	1	May 04, 2022	137852384	-	RCV000010880|RCV000508582|RCV002247318	MONDO:MONDO:0010602,MedGen:C0019069,OMIM:306700,Orphanet:98878|MedGen:CN169374|MONDO:MONDO:0859082,MedGen:C5676879,OMIM:301071	Hereditary factor VIII deficiency disease|not specified|Thrombophilia, X-linked, due to factor 8 defect	germline	germline	GRCh37	NC_000023.10	X	154225313	154225313	na	na	Xq28	criteria provided, multiple submitters, no conflicts	3	-	N	ClinGen:CA255056,UniProtKB:P00451#VAR_001054,OMIM:300841.0084	3	10167	154225313	T	G	F8:NM_000132:exon3:c.A323C:p.K108T	0.001	pathogenic	0.003	pathogenic	1.0	pathogenic	0.999	pathogenic	1.51	pathogenic	0.99	pathogenic	-5.21	pathogenic
F8	25215	single nucleotide variant	NM_000132.4(F8):c.493C>T (p.Pro165Ser)	2157	F8	HGNC:3546	Likely pathogenic	1	Jun 16, 2022	137852393	-	RCV000010889	MONDO:MONDO:0010602,MedGen:C0019069,OMIM:306700,Orphanet:98878	Hereditary factor VIII deficiency disease	germline	germline	GRCh37	NC_000023.10	X	154221319	154221319	na	na	Xq28	criteria provided, multiple submitters, no conflicts	3	-	N	ClinGen:CA255065,UniProtKB:P00451#VAR_001064,OMIM:300841.0093	3	10176	154221319	G	A	F8:NM_000132:exon4:c.C493T:p.P165S	0.0	pathogenic	0.004	pathogenic	1.0	pathogenic	1.0	pathogenic	3.13	pathogenic	0.98	pathogenic	-7.24	pathogenic
F8	25216	single nucleotide variant	NM_000132.4(F8):c.541G>A (p.Val181Met)	2157	F8	HGNC:3546	Pathogenic	1	Dec 05, 2022	137852394	-	RCV000010890|RCV000851946|RCV001701720|RCV003398478	MONDO:MONDO:0010602,MedGen:C0019069,OMIM:306700,Orphanet:98878|MONDO:MONDO:0010604,MeSH:D002836,MedGen:C0008533,OMIM:306900,Orphanet:98879|MedGen:C3661900|	Hereditary factor VIII deficiency disease|Hereditary factor IX deficiency disease|not provided|F8-related condition	germline;unknown	germline	GRCh37	NC_000023.10	X	154221271	154221271	na	na	Xq28	criteria provided, multiple submitters, no conflicts	6	-	N	ClinGen:CA255066,UniProtKB:P00451#VAR_001065,OMIM:300841.0094	3	10177	154221271	C	T	F8:NM_000132:exon4:c.G541A:p.V181M	0.001	pathogenic	0.005	pathogenic	1.0	pathogenic	1.0	pathogenic	2.695	pathogenic	0.89	pathogenic	-5.0	pathogenic
F8	25224	single nucleotide variant	NM_000132.4(F8):c.797G>A (p.Gly266Glu)	2157	F8	HGNC:3546	Likely pathogenic	1	Sep 07, 2021	137852398	-	RCV000010898	MONDO:MONDO:0010602,MedGen:C0019069,OMIM:306700,Orphanet:98878	Hereditary factor VIII deficiency disease	germline	germline	GRCh37	NC_000023.10	X	154197818	154197818	na	na	Xq28	criteria provided, single submitter	2	-	N	ClinGen:CA255071,UniProtKB:P00451#VAR_001071,OMIM:300841.0102	3	10185	154197818	C	T	F8:NM_000132:exon7:c.G797A:p.G266E	0.021	pathogenic	0.013	pathogenic	0.997	pathogenic	0.97	pathogenic	1.39	pathogenic	0.98	pathogenic	-6.67	pathogenic
F8	25231	single nucleotide variant	NM_000132.4(F8):c.902G>A (p.Arg301His)	2157	F8	HGNC:3546	Pathogenic	1	Jan 16, 2018	137852403	-	RCV000010905|RCV000255290	MONDO:MONDO:0010602,MedGen:C0019069,OMIM:306700,Orphanet:98878|MedGen:CN517202	Hereditary factor VIII deficiency disease|not provided	germline	germline	GRCh37	NC_000023.10	X	154197713	154197713	na	na	Xq28	criteria provided, multiple submitters, no conflicts	3	-	N	ClinGen:CA255079,UniProtKB:P00451#VAR_001077,OMIM:300841.0109	3	10192	154197713	C	T	F8:NM_000132:exon7:c.G902A:p.R301H	0.108	benign	0.002	pathogenic	1.0	pathogenic	1.0	pathogenic	1.845	pathogenic	0.92	pathogenic	-6.77	pathogenic
F8	25234	single nucleotide variant	NM_000132.4(F8):c.923C>T (p.Ser308Leu)	2157	F8	HGNC:3546	Pathogenic	1	Dec 01, 2022	137852404	-	RCV000010908|RCV003415685	MONDO:MONDO:0010602,MedGen:C0019069,OMIM:306700,Orphanet:98878|	Hereditary factor VIII deficiency disease|F8-related condition	germline	germline	GRCh37	NC_000023.10	X	154197692	154197692	na	na	Xq28	criteria provided, single submitter	2	-	N	ClinGen:CA255082,UniProtKB:P00451#VAR_001079,OMIM:300841.0112	3	10195	154197692	G	A	F8:NM_000132:exon7:c.C923T:p.S308L	0.65	benign	0.003	pathogenic	1.0	pathogenic	0.999	pathogenic	1.435	pathogenic	0.99	pathogenic	-6.56	pathogenic
F8	25235	single nucleotide variant	NM_000132.4(F8):c.935T>C (p.Phe312Ser)	2157	F8	HGNC:3546	Pathogenic	1	Oct 25, 2023	137852405	-	RCV000010909|RCV000852250	MONDO:MONDO:0010602,MedGen:C0019069,OMIM:306700,Orphanet:98878|MONDO:MONDO:0010604,MeSH:D002836,MedGen:C0008533,OMIM:306900,Orphanet:98879	Hereditary factor VIII deficiency disease|Hereditary factor IX deficiency disease	germline;unknown	germline	GRCh37	NC_000023.10	X	154197680	154197680	na	na	Xq28	criteria provided, multiple submitters, no conflicts	4	-	N	ClinGen:CA255083,UniProtKB:P00451#VAR_001080,OMIM:300841.0113	3	10196	154197680	A	G	F8:NM_000132:exon7:c.T935C:p.F312S	0.201	benign	0.049	pathogenic	1.0	pathogenic	0.994	pathogenic	1.51	pathogenic	0.97	pathogenic	-5.33	pathogenic
F8	25240	single nucleotide variant	NM_000132.4(F8):c.986G>A (p.Cys329Tyr)	2157	F8	HGNC:3546	Likely pathogenic	1	Nov 25, 2020	137852409	-	RCV000010914	MONDO:MONDO:0010602,MedGen:C0019069,OMIM:306700,Orphanet:98878	Hereditary factor VIII deficiency disease	germline	germline	GRCh37	NC_000023.10	X	154197629	154197629	na	na	Xq28	criteria provided, single submitter	2	-	N	ClinGen:CA255089,OMIM:300841.0118	3	10201	154197629	C	T	F8:NM_000132:exon7:c.G986A:p.C329Y	0.0	pathogenic	0.001	pathogenic	1.0	pathogenic	1.0	pathogenic	3.28	pathogenic	1.0	pathogenic	-7.34	pathogenic
F8	25244	single nucleotide variant	NM_000132.4(F8):c.1175C>T (p.Ser392Leu)	2157	F8	HGNC:3546	Likely pathogenic	1	Apr 14, 2022	28933668	-	RCV000010918|RCV003114182	MONDO:MONDO:0010602,MedGen:C0019069,OMIM:306700,Orphanet:98878|MedGen:CN517202	Hereditary factor VIII deficiency disease|not provided	germline	germline	GRCh37	NC_000023.10	X	154194797	154194797	na	na	Xq28	criteria provided, single submitter	2	-	N	ClinGen:CA255095,UniProtKB:P00451#VAR_001092,OMIM:300841.0122	3	10205	154194797	G	A	F8:NM_000132:exon8:c.C1175T:p.S392L	0.013	pathogenic	0.002	pathogenic	1.0	pathogenic	0.996	pathogenic	2.635	pathogenic	0.89	pathogenic	-5.08	pathogenic
F8	25256	single nucleotide variant	NM_000132.4(F8):c.1492G>A (p.Gly498Arg)	2157	F8	HGNC:3546	Pathogenic	1	Dec 03, 2019	137852414	-	RCV000010930|RCV000851700	MONDO:MONDO:0010602,MedGen:C0019069,OMIM:306700,Orphanet:98878|MONDO:MONDO:0010604,MeSH:D002836,MedGen:C0008533,OMIM:306900,Orphanet:98879	Hereditary factor VIII deficiency disease|Hereditary factor IX deficiency disease	germline;unknown	germline	GRCh37	NC_000023.10	X	154189395	154189395	na	na	Xq28	criteria provided, multiple submitters, no conflicts	3	-	N	ClinGen:CA255109,UniProtKB:P00451#VAR_001105,OMIM:300841.0134	3	10217	154189395	C	T	F8:NM_000132:exon10:c.G1492A:p.G498R	0.0	pathogenic	0.0	pathogenic	1.0	pathogenic	1.0	pathogenic	4.26	pathogenic	1.0	pathogenic	-9.41	pathogenic
F8	25261	single nucleotide variant	NM_000132.4(F8):c.1636C>T (p.Arg546Trp)	2157	F8	HGNC:3546	Pathogenic/Likely pathogenic	1	Feb 23, 2023	137852416	-	RCV000010935|RCV000852048|RCV003103711	MONDO:MONDO:0010602,MedGen:C0019069,OMIM:306700,Orphanet:98878|MONDO:MONDO:0010604,MeSH:D002836,MedGen:C0008533,OMIM:306900,Orphanet:98879|MedGen:CN517202	Hereditary factor VIII deficiency disease|Hereditary factor IX deficiency disease|not provided	germline;unknown	germline	GRCh37	NC_000023.10	X	154185348	154185348	na	na	Xq28	criteria provided, multiple submitters, no conflicts	6	-	N	ClinGen:CA255112,UniProtKB:P00451#VAR_001107,OMIM:300841.0139	3	10222	154185348	G	A	F8:NM_000132:exon11:c.C1636T:p.R546W	0.001	pathogenic	0.002	pathogenic	1.0	pathogenic	0.998	pathogenic	2.585	pathogenic	0.95	pathogenic	-5.03	pathogenic
F8	25263	single nucleotide variant	NM_000132.4(F8):c.1648C>G (p.Arg550Gly)	2157	F8	HGNC:3546	Likely pathogenic	1	Oct 13, 2017	137852417	-	RCV000010937|RCV000757245	MONDO:MONDO:0010602,MedGen:C0019069,OMIM:306700,Orphanet:98878|MedGen:CN517202	Hereditary factor VIII deficiency disease|not provided	germline	germline	GRCh37	NC_000023.10	X	154185336	154185336	na	na	Xq28	criteria provided, single submitter	2	-	N	ClinGen:CA255114,UniProtKB:P00451#VAR_001109,OMIM:300841.0141	3	10224	154185336	G	C	F8:NM_000132:exon11:c.C1648G:p.R550G	0.054	benign	0.002	pathogenic	1.0	pathogenic	0.997	pathogenic	2.08	pathogenic	0.91	pathogenic	-5.27	pathogenic
F8	25264	single nucleotide variant	NM_000132.4(F8):c.1649G>A (p.Arg550His)	2157	F8	HGNC:3546	Pathogenic	1	Mar 05, 2021	137852418	-	RCV000010938	MONDO:MONDO:0010602,MedGen:C0019069,OMIM:306700,Orphanet:98878	Hereditary factor VIII deficiency disease	germline	germline	GRCh37	NC_000023.10	X	154185335	154185335	na	na	Xq28	criteria provided, multiple submitters, no conflicts	3	-	N	ClinGen:CA255115,UniProtKB:P00451#VAR_001110,OMIM:300841.0142	3	10225	154185335	C	T	F8:NM_000132:exon11:c.G1649A:p.R550H	0.035	pathogenic	0.002	pathogenic	1.0	pathogenic	0.999	pathogenic	1.735	pathogenic	0.83	pathogenic	-5.24	pathogenic
F8	25265	single nucleotide variant	NM_000132.4(F8):c.1660A>G (p.Ser554Gly)	2157	F8	HGNC:3546	Pathogenic/Likely pathogenic	1	Aug 08, 2023	137852419	-	RCV000010939|RCV000727106	MONDO:MONDO:0010602,MedGen:C0019069,OMIM:306700,Orphanet:98878|MedGen:CN517202	Hereditary factor VIII deficiency disease|not provided	germline	germline	GRCh37	NC_000023.10	X	154185324	154185324	na	na	Xq28	criteria provided, multiple submitters, no conflicts	5	-	N	ClinGen:CA255116,UniProtKB:P00451#VAR_001111,OMIM:300841.0143	3	10226	154185324	T	C	F8:NM_000132:exon11:c.A1660G:p.S554G	0.0	pathogenic	0.0	pathogenic	0.999	pathogenic	0.984	pathogenic	2.785	pathogenic	0.98	pathogenic	-5.64	pathogenic
F8	25275	single nucleotide variant	NM_000132.4(F8):c.1834C>T (p.Arg612Cys)	2157	F8	HGNC:3546	Pathogenic	1	Jun 26, 2023	137852428	-	RCV000010949|RCV000413577|RCV000851933|RCV002247320	MONDO:MONDO:0010602,MedGen:C0019069,OMIM:306700,Orphanet:98878|MedGen:CN517202|MONDO:MONDO:0010604,MeSH:D002836,MedGen:C0008533,OMIM:306900,Orphanet:98879|MONDO:MONDO:0859082,MedGen:C5676879,OMIM:301071	Hereditary factor VIII deficiency disease|not provided|Hereditary factor IX deficiency disease|Thrombophilia, X-linked, due to factor 8 defect	germline;unknown	germline	GRCh37	NC_000023.10	X	154182236	154182236	na	na	Xq28	criteria provided, multiple submitters, no conflicts	8	-	N	ClinGen:CA255129,UniProtKB:P00451#VAR_001120,OMIM:300841.0153	3	10236	154182236	G	A	F8:NM_000132:exon12:c.C1834T:p.R612C	0.001	pathogenic	0.001	pathogenic	1.0	pathogenic	0.999	pathogenic	2.395	pathogenic	0.95	pathogenic	-5.34	pathogenic
F8	25284	single nucleotide variant	NM_000132.4(F8):c.2149C>T (p.Arg717Trp)	2157	F8	HGNC:3546	Pathogenic/Likely pathogenic	1	Sep 13, 2022	137852435	-	RCV000010958|RCV000851590|RCV000851937|RCV002247321|RCV002281701|RCV002490350	MONDO:MONDO:0010602,MedGen:C0019069,OMIM:306700,Orphanet:98878|Human Phenotype Ontology:HP:0001928,MedGen:C1846821|MONDO:MONDO:0010604,MeSH:D002836,MedGen:C0008533,OMIM:306900,Orphanet:98879|MONDO:MONDO:0859082,MedGen:C5676879,OMIM:301071|MedGen:CN517202|MONDO:MONDO:0859082,MedGen:C5676879,OMIM:301071;MONDO:MONDO:0010602,MedGen:C0019069,OMIM:306700,Orphanet:98878	Hereditary factor VIII deficiency disease|Abnormality of coagulation|Hereditary factor IX deficiency disease|Thrombophilia, X-linked, due to factor 8 defect|not provided|Thrombophilia, X-linked, due to factor 8 defect;Hereditary factor VIII deficiency disease	germline;unknown	germline	GRCh37	NC_000023.10	X	154159916	154159916	na	na	Xq28	criteria provided, multiple submitters, no conflicts	7	-	N	ClinGen:CA255137,UniProtKB:P00451#VAR_001130,OMIM:300841.0162	3	10245	154159916	G	A	F8:NM_000132:exon14:c.C2149T:p.R717W	0.018	pathogenic	0.0	pathogenic	1.0	pathogenic	0.999	pathogenic	2.215	pathogenic	0.98	pathogenic	-5.12	pathogenic
F8	25285	single nucleotide variant	NM_000132.4(F8):c.2167G>A (p.Ala723Thr)	2157	F8	HGNC:3546	Pathogenic	1	Jun 28, 2023	137852436	-	RCV000010959|RCV000852072|RCV001560529|RCV002490351	MONDO:MONDO:0010602,MedGen:C0019069,OMIM:306700,Orphanet:98878|MONDO:MONDO:0010604,MeSH:D002836,MedGen:C0008533,OMIM:306900,Orphanet:98879|MedGen:CN517202|MONDO:MONDO:0859082,MedGen:C5676879,OMIM:301071;MONDO:MONDO:0010602,MedGen:C0019069,OMIM:306700,Orphanet:98878	Hereditary factor VIII deficiency disease|Hereditary factor IX deficiency disease|not provided|Thrombophilia, X-linked, due to factor 8 defect;Hereditary factor VIII deficiency disease	germline;unknown	germline	GRCh37	NC_000023.10	X	154159898	154159898	na	na	Xq28	criteria provided, multiple submitters, no conflicts	7	-	N	ClinGen:CA255138,UniProtKB:P00451#VAR_001132,OMIM:300841.0163	3	10246	154159898	C	T	F8:NM_000132:exon14:c.G2167A:p.A723T	0.104	benign	0.015	pathogenic	1.0	pathogenic	0.996	pathogenic	1.395	pathogenic	0.92	pathogenic	-4.8	pathogenic
F8	25305	single nucleotide variant	NM_000132.4(F8):c.5123G>A (p.Arg1708His)	2157	F8	HGNC:3546	Pathogenic/Likely pathogenic	1	Jan 18, 2022	111033614	-	RCV000010979|RCV000851813|RCV001091839	MONDO:MONDO:0010602,MedGen:C0019069,OMIM:306700,Orphanet:98878|Human Phenotype Ontology:HP:0001928,MedGen:C1846821|MedGen:CN517202	Hereditary factor VIII deficiency disease|Abnormality of coagulation|not provided	germline;unknown	germline	GRCh37	NC_000023.10	X	154156942	154156942	na	na	Xq28	criteria provided, multiple submitters, no conflicts	6	-	N	ClinGen:CA255154,UniProtKB:P00451#VAR_001141,OMIM:300841.0183	3	10266	154156942	C	T	F8:NM_000132:exon14:c.G5123A:p.R1708H	0.009	pathogenic	0.002	pathogenic	1.0	pathogenic	0.999	pathogenic	2.11	pathogenic	0.83	pathogenic	-5.8	pathogenic
F8	25307	single nucleotide variant	NM_000132.4(F8):c.5143C>G (p.Arg1715Gly)	2157	F8	HGNC:3546	Likely pathogenic	1	Jun 24, 2022	137852439	-	RCV000010981|RCV003114183	MONDO:MONDO:0010602,MedGen:C0019069,OMIM:306700,Orphanet:98878|MedGen:CN517202	Hereditary factor VIII deficiency disease|not provided	germline	germline	GRCh37	NC_000023.10	X	154156922	154156922	na	na	Xq28	criteria provided, single submitter	2	-	N	ClinGen:CA255157,UniProtKB:P00451#VAR_001142,OMIM:300841.0185	3	10268	154156922	G	C	F8:NM_000132:exon14:c.C5143G:p.R1715G	0.001	pathogenic	0.011	pathogenic	1.0	pathogenic	0.998	pathogenic	3.575	pathogenic	0.97	pathogenic	-5.4	pathogenic
F8	25313	single nucleotide variant	NM_000132.4(F8):c.5399G>A (p.Arg1800His)	2157	F8	HGNC:3546	Pathogenic	1	Oct 31, 2022	137852442	-	RCV000010987|RCV001552643|RCV003430635	MONDO:MONDO:0010602,MedGen:C0019069,OMIM:306700,Orphanet:98878|MedGen:C3661900|	Hereditary factor VIII deficiency disease|not provided|F8-related condition	germline	germline	GRCh37	NC_000023.10	X	154133273	154133273	na	na	Xq28	criteria provided, multiple submitters, no conflicts	6	-	N	ClinGen:CA255162,UniProtKB:P00451#VAR_001150,OMIM:300841.0191	3	10274	154133273	C	T	F8:NM_000132:exon16:c.G5399A:p.R1800H	0.037	pathogenic	0.004	pathogenic	1.0	pathogenic	0.998	pathogenic	1.935	pathogenic	0.91	pathogenic	-5.67	pathogenic
F8	25317	single nucleotide variant	NM_000132.4(F8):c.5422C>T (p.Leu1808Phe)	2157	F8	HGNC:3546	Likely pathogenic	1	Jun 03, 2019	137852445	-	RCV000010991	MONDO:MONDO:0010602,MedGen:C0019069,OMIM:306700,Orphanet:98878	Hereditary factor VIII deficiency disease	germline	germline	GRCh37	NC_000023.10	X	154133250	154133250	na	na	Xq28	criteria provided, single submitter	2	-	N	ClinGen:CA255166,UniProtKB:P00451#VAR_001154,OMIM:300841.0195	3	10278	154133250	G	A	F8:NM_000132:exon16:c.C5422T:p.L1808F	0.172	benign	0.046	pathogenic	0.048	benign	0.055	benign	1.95	pathogenic	0.95	pathogenic	-5.23	pathogenic
F8	25320	single nucleotide variant	NM_000132.4(F8):c.5530C>T (p.Pro1844Ser)	2157	F8	HGNC:3546	Likely pathogenic	1	Feb 01, 2019	28933675	-	RCV000010994|RCV000851817	MONDO:MONDO:0010602,MedGen:C0019069,OMIM:306700,Orphanet:98878|MONDO:MONDO:0010604,MeSH:D002836,MedGen:C0008533,OMIM:306900,Orphanet:98879	Hereditary factor VIII deficiency disease|Hereditary factor IX deficiency disease	germline;unknown	germline	GRCh37	NC_000023.10	X	154133142	154133142	na	na	Xq28	criteria provided, single submitter	2	-	N	ClinGen:CA255170,UniProtKB:P00451#VAR_001156,OMIM:300841.0198	3	10281	154133142	G	A	F8:NM_000132:exon16:c.C5530T:p.P1844S	0.005	pathogenic	0.086	benign	1.0	pathogenic	0.999	pathogenic	3.0	pathogenic	0.97	pathogenic	-7.24	pathogenic
F8	25333	single nucleotide variant	NM_000132.4(F8):c.5822A>G (p.Asn1941Ser)	2157	F8	HGNC:3546	Pathogenic	1	Aug 04, 2022	28933682	-	RCV000011007	MONDO:MONDO:0010602,MedGen:C0019069,OMIM:306700,Orphanet:98878	Hereditary factor VIII deficiency disease	germline	germline	GRCh37	NC_000023.10	X	154132357	154132357	na	na	Xq28	criteria provided, multiple submitters, no conflicts	3	-	N	ClinGen:CA255184,UniProtKB:P00451#VAR_001169,OMIM:300841.0211	3	10294	154132357	T	C	F8:NM_000132:exon18:c.A5822G:p.N1941S	0.0	pathogenic	0.012	pathogenic	0.994	pathogenic	0.936	pathogenic	3.76	pathogenic	0.91	pathogenic	-7.09	pathogenic
F8	25343	single nucleotide variant	NM_000132.4(F8):c.6046C>T (p.Arg2016Trp)	2157	F8	HGNC:3546	Pathogenic	1	Oct 01, 2020	137852453	-	RCV000011017	MONDO:MONDO:0010602,MedGen:C0019069,OMIM:306700,Orphanet:98878	Hereditary factor VIII deficiency disease	germline	germline	GRCh37	NC_000023.10	X	154130395	154130395	na	na	Xq28	criteria provided, multiple submitters, no conflicts	4	-	N	ClinGen:CA255197,UniProtKB:P00451#VAR_001175,OMIM:300841.0221	3	10304	154130395	G	A	F8:NM_000132:exon19:c.C6046T:p.R2016W	0.082	benign	0.002	pathogenic	1.0	pathogenic	0.999	pathogenic	1.995	pathogenic	0.97	pathogenic	-6.31	pathogenic
F8	25349	single nucleotide variant	NM_000132.4(F8):c.6371A>G (p.Tyr2124Cys)	2157	F8	HGNC:3546	Pathogenic/Likely pathogenic	1	May 03, 2021	137852459	-	RCV000011023|RCV001508071	MONDO:MONDO:0010602,MedGen:C0019069,OMIM:306700,Orphanet:98878|MedGen:C3661900	Hereditary factor VIII deficiency disease|not provided	germline	germline	GRCh37	NC_000023.10	X	154124410	154124410	na	na	Xq28	criteria provided, multiple submitters, no conflicts	3	-	N	ClinGen:CA255203,UniProtKB:P00451#VAR_001183,OMIM:300841.0227	3	10310	154124410	T	C	F8:NM_000132:exon22:c.A6371G:p.Y2124C	0.0	pathogenic	0.006	pathogenic	1.0	pathogenic	1.0	pathogenic	2.47	pathogenic	0.9	pathogenic	-5.13	pathogenic
F8	25354	single nucleotide variant	NM_000132.4(F8):c.6506G>A (p.Arg2169His)	2157	F8	HGNC:3546	Pathogenic	1	Dec 22, 2021	137852461	-	RCV000011028|RCV000851846|RCV003147281	MONDO:MONDO:0010602,MedGen:C0019069,OMIM:306700,Orphanet:98878|MONDO:MONDO:0010604,MeSH:D002836,MedGen:C0008533,OMIM:306900,Orphanet:98879|MedGen:C3661900	Hereditary factor VIII deficiency disease|Hereditary factor IX deficiency disease|not provided	germline;unknown	germline	GRCh37	NC_000023.10	X	154091426	154091426	na	na	Xq28	criteria provided, multiple submitters, no conflicts	6	-	N	ClinGen:CA255208,UniProtKB:P00451#VAR_001187,OMIM:300841.0231	3	10315	154091426	C	T	F8:NM_019863:exon2:c.G101A:p.R34H,F8:NM_000132:exon23:c.G6506A:p.R2169H	0.0	pathogenic	0.003	pathogenic	1.0	pathogenic	1.0	pathogenic	4.26	pathogenic	0.95	pathogenic	-6.74	pathogenic
F8	25357	single nucleotide variant	NM_000132.4(F8):c.6532C>T (p.Arg2178Cys)	2157	F8	HGNC:3546	Pathogenic	1	Jun 13, 2022	137852464	-	RCV000011031|RCV003103985	MONDO:MONDO:0010602,MedGen:C0019069,OMIM:306700,Orphanet:98878|MedGen:CN517202	Hereditary factor VIII deficiency disease|not provided	germline	germline	GRCh37	NC_000023.10	X	154091400	154091400	na	na	Xq28	criteria provided, single submitter	3	-	N	ClinGen:CA255211,UniProtKB:P00451#VAR_001190,OMIM:300841.0234	3	10318	154091400	G	A	F8:NM_019863:exon2:c.C127T:p.R43C,F8:NM_000132:exon23:c.C6532T:p.R2178C	0.0	pathogenic	0.0	pathogenic	1.0	pathogenic	0.999	pathogenic	3.25	pathogenic	0.9	pathogenic	-5.34	pathogenic
F8	25358	single nucleotide variant	NM_000132.4(F8):c.6533G>A (p.Arg2178His)	2157	F8	HGNC:3546	Pathogenic/Likely pathogenic	1	Nov 11, 2022	137852465	-	RCV000011032|RCV000852179|RCV003114184	MONDO:MONDO:0010602,MedGen:C0019069,OMIM:306700,Orphanet:98878|MONDO:MONDO:0010604,MeSH:D002836,MedGen:C0008533,OMIM:306900,Orphanet:98879|MedGen:CN517202	Hereditary factor VIII deficiency disease|Hereditary factor IX deficiency disease|not provided	germline;unknown	germline	GRCh37	NC_000023.10	X	154091399	154091399	na	na	Xq28	criteria provided, multiple submitters, no conflicts	4	-	N	ClinGen:CA255212,UniProtKB:P00451#VAR_001191,OMIM:300841.0236	3	10319	154091399	C	T	F8:NM_019863:exon2:c.G128A:p.R43H,F8:NM_000132:exon23:c.G6533A:p.R2178H	0.031	pathogenic	0.003	pathogenic	1.0	pathogenic	0.979	pathogenic	1.415	pathogenic	0.98	pathogenic	-5.28	pathogenic
F8	25359	single nucleotide variant	NM_000132.4(F8):c.6545G>A (p.Arg2182His)	2157	F8	HGNC:3546	Pathogenic	1	Sep 10, 2021	137852466	-	RCV000011033	MONDO:MONDO:0010602,MedGen:C0019069,OMIM:306700,Orphanet:98878	Hereditary factor VIII deficiency disease	germline	germline	GRCh37	NC_000023.10	X	154091387	154091387	na	na	Xq28	criteria provided, multiple submitters, no conflicts	4	-	N	ClinGen:CA255213,UniProtKB:P00451#VAR_001194,OMIM:300841.0237	3	10320	154091387	C	T	F8:NM_019863:exon2:c.G140A:p.R47H,F8:NM_000132:exon23:c.G6545A:p.R2182H	0.0	pathogenic	0.0	pathogenic	1.0	pathogenic	1.0	pathogenic	4.285	pathogenic	1.0	pathogenic	-5.06	pathogenic
F8	25360	single nucleotide variant	NM_000132.4(F8):c.6544C>T (p.Arg2182Cys)	2157	F8	HGNC:3546	Pathogenic	1	May 04, 2022	137852467	-	RCV000011034|RCV002247323	MONDO:MONDO:0010602,MedGen:C0019069,OMIM:306700,Orphanet:98878|MONDO:MONDO:0859082,MedGen:C5676879,OMIM:301071	Hereditary factor VIII deficiency disease|Thrombophilia, X-linked, due to factor 8 defect	germline	germline	GRCh37	NC_000023.10	X	154091388	154091388	na	na	Xq28	criteria provided, multiple submitters, no conflicts	3	-	N	ClinGen:CA255214,UniProtKB:P00451#VAR_001193,OMIM:300841.0238	3	10321	154091388	G	A	F8:NM_019863:exon2:c.C139T:p.R47C,F8:NM_000132:exon23:c.C6544T:p.R2182C	0.0	pathogenic	0.0	pathogenic	1.0	pathogenic	1.0	pathogenic	4.285	pathogenic	0.79	pathogenic	-5.04	pathogenic
F8	25366	single nucleotide variant	NM_000132.4(F8):c.6744G>T (p.Trp2248Cys)	2157	F8	HGNC:3546	Pathogenic	1	Oct 07, 2022	137852469	-	RCV000011040|RCV000851849|RCV003114185	MONDO:MONDO:0010602,MedGen:C0019069,OMIM:306700,Orphanet:98878|MONDO:MONDO:0010604,MeSH:D002836,MedGen:C0008533,OMIM:306900,Orphanet:98879|MedGen:CN517202	Hereditary factor VIII deficiency disease|Hereditary factor IX deficiency disease|not provided	germline;unknown	germline	GRCh37	NC_000023.10	X	154088863	154088863	na	na	Xq28	criteria provided, multiple submitters, no conflicts	3	-	N	ClinGen:CA255218,UniProtKB:P00451#VAR_001205,OMIM:300841.0244	3	10327	154088863	C	A	F8:NM_019863:exon4:c.G339T:p.W113C,F8:NM_000132:exon25:c.G6744T:p.W2248C	0.0	pathogenic	0.0	pathogenic	1.0	pathogenic	0.999	pathogenic	4.18	pathogenic	0.97	pathogenic	-5.29	pathogenic
F8	25371	single nucleotide variant	NM_000132.4(F8):c.6956C>T (p.Pro2319Leu)	2157	F8	HGNC:3546	Pathogenic	1	Feb 01, 2019	137852472	-	RCV000011045|RCV000851613|RCV001701721	MONDO:MONDO:0010602,MedGen:C0019069,OMIM:306700,Orphanet:98878|MONDO:MONDO:0010604,MeSH:D002836,MedGen:C0008533,OMIM:306900,Orphanet:98879|MedGen:CN517202	Hereditary factor VIII deficiency disease|Hereditary factor IX deficiency disease|not provided	germline;unknown	germline	GRCh37	NC_000023.10	X	154065972	154065972	na	na	Xq28	criteria provided, single submitter	4	-	N	ClinGen:CA255224,UniProtKB:P00451#VAR_001207,OMIM:300841.0249	3	10332	154065972	G	A	F8:NM_019863:exon5:c.C551T:p.P184L,F8:NM_000132:exon26:c.C6956T:p.P2319L	0.0	pathogenic	0.003	pathogenic	1.0	pathogenic	1.0	pathogenic	3.675	pathogenic	0.97	pathogenic	-4.75	pathogenic
F8	25372	single nucleotide variant	NM_000132.4(F8):c.6967C>T (p.Arg2323Cys)	2157	F8	HGNC:3546	Pathogenic	1	Aug 22, 2023	137852473	-	RCV000011046	MONDO:MONDO:0010602,MedGen:C0019069,OMIM:306700,Orphanet:98878	Hereditary factor VIII deficiency disease	germline	germline	GRCh37	NC_000023.10	X	154065961	154065961	na	na	Xq28	criteria provided, multiple submitters, no conflicts	3	-	N	ClinGen:CA255225,UniProtKB:P00451#VAR_001209,OMIM:300841.0250	3	10333	154065961	G	A	F8:NM_019863:exon5:c.C562T:p.R188C,F8:NM_000132:exon26:c.C6967T:p.R2323C	0.0	pathogenic	0.0	pathogenic	1.0	pathogenic	1.0	pathogenic	4.205	pathogenic	0.92	pathogenic	-5.56	pathogenic
F8	25390	single nucleotide variant	NM_000132.4(F8):c.592T>G (p.Cys198Gly)	2157	F8	HGNC:3546	Likely pathogenic	1	Aug 24, 2020	137852475	-	RCV000011064	MONDO:MONDO:0010602,MedGen:C0019069,OMIM:306700,Orphanet:98878	Hereditary factor VIII deficiency disease	germline	germline	GRCh37	NC_000023.10	X	154221220	154221220	na	na	Xq28	criteria provided, single submitter	2	-	N	ClinGen:CA255227,UniProtKB:P00451#VAR_028490,OMIM:300841.0268	3	10351	154221220	A	C	F8:NM_000132:exon4:c.T592G:p.C198G	0.0	pathogenic	0.0	pathogenic	1.0	pathogenic	1.0	pathogenic	2.765	pathogenic	1.0	pathogenic	-5.54	pathogenic
NR0B1	25991	single nucleotide variant	NM_000475.5(NR0B1):c.800G>C (p.Arg267Pro)	190	NR0B1	HGNC:7960	Pathogenic/Likely pathogenic	1	Sep 02, 2021	104894888	-	RCV000011699|RCV001851797	MONDO:MONDO:0010264,MedGen:C0342482,OMIM:300200,Orphanet:95702|MONDO:MONDO:0010264,MedGen:C0342482,OMIM:300200,Orphanet:95702;MONDO:MONDO:0010226,MedGen:C1848296,OMIM:300018	Congenital adrenal hypoplasia, X-linked|Congenital adrenal hypoplasia, X-linked;46,XY sex reversal 2	germline;maternal	germline	GRCh37	NC_000023.10	X	30326681	30326681	na	na	Xp21.2	criteria provided, multiple submitters, no conflicts	3	-	N	ClinGen:CA255621,UniProtKB:P51843#VAR_004738,OMIM:300473.0004	3	10952	30326681	C	G	NR0B1:NM_000475:exon1:c.G800C:p.R267P	0.004	pathogenic	0.015	pathogenic	1.0	pathogenic	0.995	pathogenic	2.67	pathogenic	0.75	pathogenic	-4.13	pathogenic
PHF6	26107	single nucleotide variant	NM_001015877.2(PHF6):c.2T>C (p.Met1Thr)	84295	PHF6	HGNC:18145	Pathogenic	1	Jul 22, 2022	132630300	-	RCV000011817|RCV002286694|RCV002512974	MONDO:MONDO:0010537,MedGen:C0265339,OMIM:301900,Orphanet:127|MONDO:MONDO:0008438,MedGen:C1866855,OMIM:182601,Orphanet:100985|MedGen:CN517202	Borjeson-Forssman-Lehmann syndrome|Hereditary spastic paraplegia 4|not provided	germline;inherited;maternal;unknown	germline	GRCh37	NC_000023.10	X	133511649	133511649	na	na	Xq26.2	criteria provided, multiple submitters, no conflicts	7	-	N	ClinGen:CA121334,OMIM:300414.0006	3	11068	133511649	T	C	PHF6:NM_001015877:exon2:c.T2C:p.M1T,PHF6:NM_032335:exon2:c.T2C:p.M1T,PHF6:NM_032458:exon2:c.T2C:p.M1T	0.0	pathogenic	0.0	pathogenic	0.96	pathogenic	0.888	pathogenic	-	-	0.99	pathogenic	-2.71	pathogenic
ATRX	26760	single nucleotide variant	NM_000489.6(ATRX):c.4826A>G (p.His1609Arg)	546	ATRX	HGNC:886	Likely pathogenic	1	Mar 22, 2022	122445093	-	RCV000012487|RCV002285255	MONDO:MONDO:0010519,MedGen:C1845055,OMIM:301040,Orphanet:847|MedGen:CN517202	Alpha thalassemia-X-linked intellectual disability syndrome|not provided	germline	germline	GRCh37	NC_000023.10	X	76889184	76889184	na	na	Xq21.1	criteria provided, single submitter	2	-	N	ClinGen:CA256016,OMIM:300032.0001	3	11721	76889184	T	C	ATRX:NM_138270:exon17:c.A4712G:p.H1571R,ATRX:NM_000489:exon18:c.A4826G:p.H1609R	0.005	pathogenic	0.003	pathogenic	1.0	pathogenic	0.999	pathogenic	2.415	pathogenic	0.99	pathogenic	-3.16	pathogenic
ATRX	26763	single nucleotide variant	NM_000489.6(ATRX):c.5579A>G (p.Asn1860Ser)	546	ATRX	HGNC:886	Benign/Likely benign	1	Nov 03, 2022	45439799	-	RCV000012490|RCV000078966|RCV000428077|RCV000588578|RCV000590248|RCV002311512	MONDO:MONDO:0010519,MedGen:C1845055,OMIM:301040,Orphanet:847|MedGen:CN169374|MedGen:C3661900|Human Phenotype Ontology:HP:0034401,MONDO:MONDO:0020560,MedGen:C1266184,Orphanet:99966|MONDO:MONDO:0016684,MedGen:C0334579,Orphanet:251589|MeSH:D030342,MedGen:C0950123	Alpha thalassemia-X-linked intellectual disability syndrome|not specified|not provided|Atypical teratoid rhabdoid tumor|Astrocytoma, anaplastic|Inborn genetic diseases	germline;unknown	germline	GRCh37	NC_000023.10	X	76856021	76856021	na	na	Xq21.1	criteria provided, multiple submitters, no conflicts	21	-	N	ClinGen:CA146691,OMIM:300032.0004	3	11724	76856021	T	C	ATRX:NM_138270:exon22:c.A5465G:p.N1822S,ATRX:NM_000489:exon23:c.A5579G:p.N1860S	1.0	benign	0.814	benign	0.0	benign	0.0	benign	-0.015	benign	0.0	benign	-3.07	pathogenic
ATRX	26770	single nucleotide variant	NM_000489.6(ATRX):c.6392G>A (p.Arg2131Gln)	546	ATRX	HGNC:886	Pathogenic	1	May 15, 2023	122445101	-	RCV000012497|RCV000199096|RCV002272014|RCV003415687	|MONDO:MONDO:0010663,MedGen:C4759781,OMIM:309580,Orphanet:73220,Orphanet:93970,Orphanet:93971,Orphanet:93972,Orphanet:93973,Orphanet:93974,Orphanet:93975;MONDO:MONDO:0010519,MedGen:C1845055,OMIM:301040,Orphanet:847|MedGen:C3661900|	Intellectual disability-hypotonic facies syndrome, X-linked|Intellectual disability-hypotonic facies syndrome, X-linked, 1;Alpha thalassemia-X-linked intellectual disability syndrome|not provided|ATRX-related condition	germline	germline	GRCh37	NC_000023.10	X	76814252	76814252	na	na	Xq21.1	criteria provided, multiple submitters, no conflicts	4	-	N	ClinGen:CA121644,OMIM:300032.0011	3	11731	76814252	C	T	ATRX:NM_138270:exon28:c.G6278A:p.R2093Q,ATRX:NM_000489:exon29:c.G6392A:p.R2131Q	0.001	pathogenic	0.0	pathogenic	1.0	pathogenic	0.998	pathogenic	3.115	pathogenic	0.96	pathogenic	-0.92	benign
ATRX	26773	single nucleotide variant	NM_000489.6(ATRX):c.568C>G (p.Pro190Ala)	546	ATRX	HGNC:886	Likely pathogenic	1	May 21, 2013	122445103	-	RCV000012500|RCV000197579	MONDO:MONDO:0010519,MedGen:C1845055,OMIM:301040,Orphanet:847|MONDO:MONDO:0010519,MedGen:C1845055,OMIM:301040,Orphanet:847;MONDO:MONDO:0010663,MedGen:C4759781,OMIM:309580,Orphanet:73220,Orphanet:93970,Orphanet:93971,Orphanet:93972,Orphanet:93973,Orphanet:93974,Orphanet:93975	Alpha thalassemia-X-linked intellectual disability syndrome|Alpha thalassemia-X-linked intellectual disability syndrome;Intellectual disability-hypotonic facies syndrome, X-linked, 1	germline	germline	GRCh37	NC_000023.10	X	76944337	76944337	na	na	Xq21.1	criteria provided, single submitter	2	-	N	ClinGen:CA256044,OMIM:300032.0014	3	11734	76944337	G	C	ATRX:NM_138270:exon6:c.C454G:p.P152A,ATRX:NM_000489:exon7:c.C568G:p.P190A	0.001	pathogenic	0.0	pathogenic	0.993	pathogenic	0.986	pathogenic	2.98	pathogenic	0.96	pathogenic	-3.54	pathogenic
ATRX	26774	single nucleotide variant	NM_000489.6(ATRX):c.736C>T (p.Arg246Cys)	546	ATRX	HGNC:886	Pathogenic/Likely pathogenic	1	Jul 01, 2023	122445105	-	RCV000078972|RCV000190796|RCV000659281|RCV000763634|RCV001252427|RCV001249275	MedGen:C3661900|MeSH:D030342,MedGen:C0950123|MONDO:MONDO:0010519,MedGen:C1845055,OMIM:301040,Orphanet:847|MONDO:MONDO:0010663,MedGen:C4759781,OMIM:309580,Orphanet:73220,Orphanet:93970,Orphanet:93971,Orphanet:93972,Orphanet:93973,Orphanet:93974,Orphanet:93975;MONDO:MONDO:0010328,MedGen:C0585216,OMIM:300448,Orphanet:231401;MONDO:MONDO:0010519,MedGen:C1845055,OMIM:301040,Orphanet:847|MONDO:MONDO:001…	not provided|Inborn genetic diseases|Alpha thalassemia-X-linked intellectual disability syndrome|Intellectual disability-hypotonic facies syndrome, X-linked, 1;Acquired hemoglobin H disease;Alpha thalassemia-X-linked intellectual disability syndrome|Intellectual disability-hypotonic facies syndrome, X-linked, 1|Renier-Gabreels-Jasper syndrome	germline;unknown	germline	GRCh37	NC_000023.10	X	76940012	76940012	na	na	Xq21.1	criteria provided, multiple submitters, no conflicts	17	-	N	ClinGen:CA204872,OMIM:300032.0018	2	11735	76940012	G	A	ATRX:NM_138270:exon8:c.C622T:p.R208C,ATRX:NM_000489:exon9:c.C736T:p.R246C	0.0	pathogenic	0.0	pathogenic	1.0	pathogenic	0.998	pathogenic	2.885	pathogenic	0.92	pathogenic	-5.2	pathogenic
ATRX	26778	single nucleotide variant	NM_000489.6(ATRX):c.4862C>T (p.Thr1621Met)	546	ATRX	HGNC:886	Likely pathogenic	1	Jan 23, 2023	122445106	-	RCV000012505|RCV003128081	MONDO:MONDO:0010519,MedGen:C1845055,OMIM:301040,Orphanet:847|MONDO:MONDO:0010663,MedGen:C4759781,OMIM:309580,Orphanet:73220,Orphanet:93970,Orphanet:93971,Orphanet:93972,Orphanet:93973,Orphanet:93974,Orphanet:93975	Alpha thalassemia-X-linked intellectual disability syndrome|Intellectual disability-hypotonic facies syndrome, X-linked, 1	germline;maternal	germline	GRCh37	NC_000023.10	X	76889148	76889148	na	na	Xq21.1	criteria provided, single submitter	2	-	N	ClinGen:CA256049,OMIM:300032.0019	3	11739	76889148	G	A	ATRX:NM_138270:exon17:c.C4748T:p.T1583M,ATRX:NM_000489:exon18:c.C4862T:p.T1621M	0.01	pathogenic	0.001	pathogenic	1.0	pathogenic	1.0	pathogenic	2.79	pathogenic	0.8	pathogenic	-3.28	pathogenic
ATRX	26784	single nucleotide variant	NM_000489.6(ATRX):c.659G>A (p.Cys220Tyr)	546	ATRX	HGNC:886	Pathogenic/Likely pathogenic	1	Aug 10, 2021	122445111	-	RCV000012511|RCV000624600|RCV001582475	|MeSH:D030342,MedGen:C0950123|MONDO:MONDO:0010519,MedGen:C1845055,OMIM:301040,Orphanet:847	Intellectual disability-hypotonic facies syndrome, X-linked|Inborn genetic diseases|Alpha thalassemia-X-linked intellectual disability syndrome	germline	germline	GRCh37	NC_000023.10	X	76940434	76940434	na	na	Xq21.1	criteria provided, multiple submitters, no conflicts	3	-	N	ClinGen:CA121660,OMIM:300032.0025	3	11745	76940434	C	T	ATRX:NM_138270:exon7:c.G545A:p.C182Y,ATRX:NM_000489:exon8:c.G659A:p.C220Y	0.0	pathogenic	0.001	pathogenic	0.999	pathogenic	0.998	pathogenic	2.98	pathogenic	1.0	pathogenic	-5.73	pathogenic
PCCB	27050	single nucleotide variant	NM_000532.5(PCCB):c.1228C>T (p.Arg410Trp)	5096	PCCB	HGNC:8654	Pathogenic/Likely pathogenic	1	Sep 29, 2022	121964959	-	RCV000012791	Human Phenotype Ontology:HP:0003571,MONDO:MONDO:0011628,MedGen:C0268579,OMIM:606054,Orphanet:35	Propionic acidemia	germline;unknown	germline	GRCh37	NC_000003.11	3	136046026	136046026	na	na	3q22.3	criteria provided, multiple submitters, no conflicts	7	-	N	ClinGen:CA343136,UniProtKB:P05166#VAR_000278,OMIM:232050.0001	3	12011	136046026	C	T	PCCB:NM_000532:exon12:c.C1228T:p.R410W,PCCB:NM_001178014:exon13:c.C1288T:p.R430W	0.0	pathogenic	0.0	pathogenic	1.0	pathogenic	1.0	pathogenic	4.51	pathogenic	1.0	pathogenic	-4.74	pathogenic
PCCB	27054	single nucleotide variant	NM_000532.5(PCCB):c.502G>A (p.Glu168Lys)	5096	PCCB	HGNC:8654	Pathogenic/Likely pathogenic	1	Jun 09, 2022	121964960	-	RCV000012795	Human Phenotype Ontology:HP:0003571,MONDO:MONDO:0011628,MedGen:C0268579,OMIM:606054,Orphanet:35	Propionic acidemia	germline;unknown	germline	GRCh37	NC_000003.11	3	135980866	135980866	na	na	3q22.3	criteria provided, multiple submitters, no conflicts	8	-	Y	ClinGen:CA341173,UniProtKB:P05166#VAR_000275,OMIM:232050.0005	3	12015	135980866	G	A	PCCB:NM_000532:exon5:c.G502A:p.E168K,PCCB:NM_001178014:exon6:c.G562A:p.E188K	0.0	pathogenic	0.0	pathogenic	1.0	pathogenic	0.994	pathogenic	4.335	pathogenic	1.0	pathogenic	-4.62	pathogenic
PCCB	27055	single nucleotide variant	NM_000532.5(PCCB):c.1283C>T (p.Thr428Ile)	5096	PCCB	HGNC:8654	Pathogenic	1	Aug 21, 2022	111033542	-	RCV000012796	Human Phenotype Ontology:HP:0003571,MONDO:MONDO:0011628,MedGen:C0268579,OMIM:606054,Orphanet:35	Propionic acidemia	germline;unknown	germline	GRCh37	NC_000003.11	3	136046081	136046081	na	na	3q22.3	criteria provided, multiple submitters, no conflicts	8	-	N	ClinGen:CA341174,UniProtKB:P05166#VAR_009084,OMIM:232050.0006	3	12016	136046081	C	T	PCCB:NM_000532:exon12:c.C1283T:p.T428I,PCCB:NM_001178014:exon13:c.C1343T:p.T448I	0.0	pathogenic	0.0	pathogenic	1.0	pathogenic	0.999	pathogenic	4.295	pathogenic	1.0	pathogenic	-3.84	pathogenic
PCCB	27057	single nucleotide variant	NM_000532.5(PCCB):c.1304A>G (p.Tyr435Cys)	5096	PCCB	HGNC:8654	Pathogenic/Likely pathogenic	1	Jul 12, 2023	121964961	-	RCV000012798	Human Phenotype Ontology:HP:0003571,MONDO:MONDO:0011628,MedGen:C0268579,OMIM:606054,Orphanet:35	Propionic acidemia	germline;unknown	germline	GRCh37	NC_000003.11	3	136046480	136046480	na	na	3q22.3	criteria provided, multiple submitters, no conflicts	10	-	N	ClinGen:CA341178,UniProtKB:P05166#VAR_023856,OMIM:232050.0008	3	12018	136046480	A	G	PCCB:NM_000532:exon13:c.A1304G:p.Y435C,PCCB:NM_001178014:exon14:c.A1364G:p.Y455C	0.0	pathogenic	0.0	pathogenic	1.0	pathogenic	0.997	pathogenic	4.73	pathogenic	1.0	pathogenic	-4.68	pathogenic
CYP21A2	27189	single nucleotide variant	NM_000500.9(CYP21A2):c.518T>A (p.Ile173Asn)	1589	CYP21A2	HGNC:2600	Pathogenic	1	Mar 15, 2023	6475	-	RCV000012933|RCV000622562|RCV000711382|RCV003226157	MONDO:MONDO:0008728,MedGen:C2936858,OMIM:201910,Orphanet:90794|MeSH:D030342,MedGen:C0950123|MedGen:CN517202|Human Phenotype Ontology:HP:0008258,MONDO:MONDO:0018479,MedGen:C0001627,Orphanet:418	Classic congenital adrenal hyperplasia due to 21-hydroxylase deficiency|Inborn genetic diseases|not provided|Congenital adrenal hyperplasia	germline;inherited;unknown	germline	GRCh37	NC_000006.11	6	32007203	32007203	na	na	6p21.33	criteria provided, multiple submitters, no conflicts	19	-	N	ClinGen:CA341179,OMIM:613815.0001,ClinVar:427840,ClinVar:427842	3	12150	32007203	T	A	CYP21A2:NM_001128590:exon3:c.T428A:p.I143N,CYP21A2:NM_001368144:exon3:c.T113A:p.I38N,CYP21A2:NM_000500:exon4:c.T518A:p.I173N,CYP21A2:NM_001368143:exon4:c.T113A:p.I38N	0.004	pathogenic	0.018	pathogenic	-	-	-	-	-	-	0.98	pathogenic	-0.93	benign
CYP21A2	27190	single nucleotide variant	NM_000500.9(CYP21A2):c.844G>T (p.Val282Leu)	1589	CYP21A2	HGNC:2600	Pathogenic/Likely pathogenic	1	May 24, 2023	6471	-	RCV000012935|RCV000012934|RCV000012936|RCV000210728|RCV000711385|RCV001804725|RCV003407320	MedGen:C3151153|MONDO:MONDO:0008728,MedGen:C2936858,OMIM:201910,Orphanet:90794|MedGen:C1859998|MeSH:D030342,MedGen:C0950123|MedGen:C3661900|Human Phenotype Ontology:HP:0008258,MONDO:MONDO:0018479,MedGen:C0001627,Orphanet:418|	Adenoma, cortisol-producing|Classic congenital adrenal hyperplasia due to 21-hydroxylase deficiency|Carcinoma, adrenocortical, androgen-secreting|Inborn genetic diseases|not provided|Congenital adrenal hyperplasia|CYP21A2-related condition	germline;maternal;unknown	germline	GRCh37	NC_000006.11	6	32007887	32007887	na	na	6p21.33	criteria provided, multiple submitters, no conflicts	28	-	N	ClinGen:CA121919,OMIM:613815.0002,OMIM:613815.0033,ClinVar:12182	3	12151	32007887	G	T	CYP21A2:NM_001128590:exon6:c.G754T:p.V252L,CYP21A2:NM_001368144:exon6:c.G439T:p.V147L,CYP21A2:NM_000500:exon7:c.G844T:p.V282L,CYP21A2:NM_001368143:exon7:c.G439T:p.V147L	0.578	benign	0.407	benign	-	-	-	-	-	-	0.76	pathogenic	-0.03	benign
CYP21A2	27191	single nucleotide variant	NM_000500.9(CYP21A2):c.1069C>T (p.Arg357Trp)	-1	CYP21A2;LOC106780800;TNXB	-	Pathogenic	1	Apr 17, 2023	7769409	-	RCV000012937|RCV000711368|RCV003407321	MONDO:MONDO:0008728,MedGen:C2936858,OMIM:201910,Orphanet:90794|MedGen:C3661900|	Classic congenital adrenal hyperplasia due to 21-hydroxylase deficiency|not provided|CYP21A2-related condition	germline;unknown	germline	GRCh37	NC_000006.11	6	32008312	32008312	na	na	6p21.33	criteria provided, multiple submitters, no conflicts	13	-	N	ClinGen:CA341181,OMIM:613815.0003,OMIM:613815.0033,ClinVar:12182	3	12152	32008312	C	T	CYP21A2:NM_001128590:exon7:c.C979T:p.R327W,CYP21A2:NM_001368144:exon7:c.C664T:p.R222W,CYP21A2:NM_000500:exon8:c.C1069T:p.R357W,CYP21A2:NM_001368143:exon8:c.C664T:p.R222W	0.0	pathogenic	0.051	benign	-	-	-	-	-	-	0.96	pathogenic	-1.28	benign
CYP21A2	27192	single nucleotide variant	NM_000500.9(CYP21A2):c.92C>T (p.Pro31Leu)	1589	CYP21A2	HGNC:2600	Pathogenic	1	Oct 31, 2022	9378251	-	RCV000012938|RCV000711390	MONDO:MONDO:0008728,MedGen:C2936858,OMIM:201910,Orphanet:90794|MedGen:CN517202	Classic congenital adrenal hyperplasia due to 21-hydroxylase deficiency|not provided	germline;unknown	germline	GRCh37	NC_000006.11	6	32006291	32006291	na	na	6p21.33	criteria provided, multiple submitters, no conflicts	9	-	N	ClinGen:CA341183,OMIM:613815.0004	3	12153	32006291	C	T	CYP21A2:NM_000500:exon1:c.C92T:p.P31L,CYP21A2:NM_001128590:exon1:c.C92T:p.P31L	0.185	benign	0.057	benign	-	-	-	-	-	-	0.94	pathogenic	-0.88	benign
CYP21A2	27193	single nucleotide variant	NM_000500.9(CYP21A2):c.806G>C (p.Ser269Thr)	-1	CYP21A2;LOC106780800;TNXB	-	Benign	0	Apr 13, 2017	6472	-	RCV000024069|RCV000029655|RCV000055819|RCV000252481|RCV001529036	|Human Phenotype Ontology:HP:0008258,MONDO:MONDO:0018479,MedGen:C0001627,Orphanet:418|MONDO:MONDO:0008728,MedGen:C2936858,OMIM:201910,Orphanet:90794|MedGen:CN169374|MedGen:C3661900	21-HYDROXYLASE POLYMORPHISM|Congenital adrenal hyperplasia|Classic congenital adrenal hyperplasia due to 21-hydroxylase deficiency|not specified|not provided	germline;unknown	germline	GRCh37	NC_000006.11	6	32007849	32007849	na	na	6p21.33	criteria provided, multiple submitters, no conflicts	8	-	N	ClinGen:CA129645,OMIM:613815.0005	3	12154	32007849	G	C	CYP21A2:NM_001128590:exon6:c.G716C:p.S239T,CYP21A2:NM_001368144:exon6:c.G401C:p.S134T,CYP21A2:NM_000500:exon7:c.G806C:p.S269T,CYP21A2:NM_001368143:exon7:c.G401C:p.S134T	0.357	benign	0.599	benign	-	-	-	-	-	-	0.08	benign	-1.24	benign
CYP21A2	27195	single nucleotide variant	NM_000500.9(CYP21A2):c.874G>A (p.Gly292Ser)	1589	CYP21A2	HGNC:2600	Pathogenic/Likely pathogenic	1	Aug 07, 2021	201552310	-	RCV000012940|RCV000711386	MONDO:MONDO:0008728,MedGen:C2936858,OMIM:201910,Orphanet:90794|MedGen:CN517202	Classic congenital adrenal hyperplasia due to 21-hydroxylase deficiency|not provided	germline	germline	GRCh37	NC_000006.11	6	32007917	32007917	na	na	6p21.33	criteria provided, multiple submitters, no conflicts	4	-	N	ClinGen:CA256231,OMIM:613815.0007	3	12156	32007917	G	A	CYP21A2:NM_001128590:exon6:c.G784A:p.G262S,CYP21A2:NM_001368144:exon6:c.G469A:p.G157S,CYP21A2:NM_000500:exon7:c.G874A:p.G292S,CYP21A2:NM_001368143:exon7:c.G469A:p.G157S	0.008	pathogenic	0.013	pathogenic	-	-	-	-	-	-	0.99	pathogenic	-1.36	benign
CYP21A2	27198	single nucleotide variant	NM_000500.9(CYP21A2):c.1360C>T (p.Pro454Ser)	1589	CYP21A2	HGNC:2600	Pathogenic/Likely pathogenic	1	Jul 26, 2023	6445	-	RCV000012943|RCV000711371|RCV002288483	MONDO:MONDO:0008728,MedGen:C2936858,OMIM:201910,Orphanet:90794|MedGen:CN517202|MONDO:MONDO:0008725,MedGen:C0342474,OMIM:201710,Orphanet:418,Orphanet:90790	Classic congenital adrenal hyperplasia due to 21-hydroxylase deficiency|not provided|Congenital lipoid adrenal hyperplasia due to STAR deficency	germline;unknown	germline	GRCh37	NC_000006.11	6	32008783	32008783	na	na	6p21.33	criteria provided, multiple submitters, no conflicts	25	-	N	ClinGen:CA341186,OMIM:613815.0009,OMIM:613815.0010,OMIM:613815.0021,ClinVar:12158,ClinVar:12170	3	12159	32008783	C	T	CYP21A2:NM_001128590:exon9:c.C1270T:p.P424S,CYP21A2:NM_001368144:exon9:c.C955T:p.P319S,CYP21A2:NM_000500:exon10:c.C1360T:p.P454S,CYP21A2:NM_001368143:exon10:c.C955T:p.P319S	0.003	pathogenic	0.009	pathogenic	-	-	-	-	-	-	0.71	pathogenic	-0.37	benign
CYP21A2	27209	single nucleotide variant	NM_000500.9(CYP21A2):c.1019G>A (p.Arg340His)	1589	CYP21A2	HGNC:2600	Pathogenic	1	Jul 26, 2023	-1	-	RCV003318405	MONDO:MONDO:0008728,MedGen:C2936858,OMIM:201910,Orphanet:90794	Classic congenital adrenal hyperplasia due to 21-hydroxylase deficiency	germline	germline	GRCh37	NC_000006.11	6	32008262	32008262	na	na	6p21.33	criteria provided, single submitter	1	-	N	OMIM:613815.0021,ClinVar:12170	2	1341485	32008262	G	A	CYP21A2:NM_001128590:exon7:c.G929A:p.R310H,CYP21A2:NM_001368144:exon7:c.G614A:p.R205H,CYP21A2:NM_000500:exon8:c.G1019A:p.R340H,CYP21A2:NM_001368143:exon8:c.G614A:p.R205H	0.002	pathogenic	0.018	pathogenic	-	-	-	-	-	-	0.23	benign	-0.46	benign
CYP21A2	27214	single nucleotide variant	NM_000500.9(CYP21A2):c.1280G>A (p.Arg427His)	1589	CYP21A2	HGNC:2600	Pathogenic	1	Sep 25, 2022	151344504	-	RCV000012957|RCV001851813|RCV003390673	MONDO:MONDO:0008728,MedGen:C2936858,OMIM:201910,Orphanet:90794|MedGen:C3661900|	Classic congenital adrenal hyperplasia due to 21-hydroxylase deficiency|not provided|CYP21A2-related condition	germline	germline	GRCh37	NC_000006.11	6	32008703	32008703	na	na	6p21.33	criteria provided, multiple submitters, no conflicts	3	-	N	OMIM:613815.0026	3	12175	32008703	G	A	CYP21A2:NM_001128590:exon9:c.G1190A:p.R397H,CYP21A2:NM_001368144:exon9:c.G875A:p.R292H,CYP21A2:NM_000500:exon10:c.G1280A:p.R427H,CYP21A2:NM_001368143:exon10:c.G875A:p.R292H	0.001	pathogenic	0.0	pathogenic	-	-	-	-	-	-	0.96	pathogenic	-3.11	pathogenic
CYP21A2	27218	single nucleotide variant	NM_000500.9(CYP21A2):c.1225C>T (p.Arg409Cys)	1589	CYP21A2	HGNC:2600	Pathogenic	1	Mar 23, 2022	72552757	-	RCV000012961|RCV002472928	MONDO:MONDO:0008728,MedGen:C2936858,OMIM:201910,Orphanet:90794|MedGen:CN517202	Classic congenital adrenal hyperplasia due to 21-hydroxylase deficiency|not provided	germline;unknown	germline	GRCh37	NC_000006.11	6	32008648	32008648	na	na	6p21.33	criteria provided, multiple submitters, no conflicts	4	-	N	OMIM:613815.0030	3	12179	32008648	C	T	CYP21A2:NM_001128590:exon9:c.C1135T:p.R379C,CYP21A2:NM_001368144:exon9:c.C820T:p.R274C,CYP21A2:NM_000500:exon10:c.C1225T:p.R409C,CYP21A2:NM_001368143:exon10:c.C820T:p.R274C	0.02	pathogenic	0.0	pathogenic	-	-	-	-	-	-	0.98	pathogenic	-3.39	pathogenic
HSD3B2	27227	single nucleotide variant	NM_000198.4(HSD3B2):c.29C>A (p.Ala10Glu)	3284	HSD3B2	HGNC:5218	Likely pathogenic	1	May 14, 2022	28934880	-	RCV000012971	MONDO:MONDO:0008727,MeSH:C538236,MedGen:C0342471,OMIM:201810,Orphanet:90791	3 beta-Hydroxysteroid dehydrogenase deficiency	germline;unknown	germline	GRCh37	NC_000001.10	1	119958071	119958071	na	na	1p12	criteria provided, single submitter	2	-	N	ClinGen:CA121927,UniProtKB:P26439#VAR_010517,OMIM:613890.0005	3	12188	119958071	C	A	HSD3B2:NM_000198:exon2:c.C29A:p.A10E,HSD3B2:NM_001166120:exon2:c.C29A:p.A10E	0.001	pathogenic	0.002	pathogenic	0.996	pathogenic	0.969	pathogenic	3.935	pathogenic	0.91	pathogenic	-2.87	pathogenic
HSD3B2	27229	single nucleotide variant	NM_000198.4(HSD3B2):c.424G>A (p.Glu142Lys)	3284	HSD3B2	HGNC:5218	Pathogenic	1	Oct 24, 2022	80358219	-	RCV000012973|RCV001233258	MONDO:MONDO:0008727,MeSH:C538236,MedGen:C0342471,OMIM:201810,Orphanet:90791|MedGen:CN517202	3 beta-Hydroxysteroid dehydrogenase deficiency|not provided	germline	germline	GRCh37	NC_000001.10	1	119964548	119964548	na	na	1p12	criteria provided, single submitter	3	-	N	ClinGen:CA121931,UniProtKB:P26439#VAR_000006,OMIM:613890.0007	3	12190	119964548	G	A	HSD3B2:NM_000198:exon4:c.G424A:p.E142K,HSD3B2:NM_001166120:exon4:c.G424A:p.E142K	0.0	pathogenic	0.02	pathogenic	1.0	pathogenic	0.954	pathogenic	4.58	pathogenic	0.96	pathogenic	-3.25	pathogenic
HSD3B2	27230	single nucleotide variant	NM_000198.4(HSD3B2):c.664C>A (p.Pro222Thr)	3284	HSD3B2	HGNC:5218	Pathogenic	1	Jun 29, 2022	80358220	-	RCV000012974|RCV002271368	MONDO:MONDO:0008727,MeSH:C538236,MedGen:C0342471,OMIM:201810,Orphanet:90791|Human Phenotype Ontology:HP:0008258,MONDO:MONDO:0018479,MedGen:C0001627,Orphanet:418	3 beta-Hydroxysteroid dehydrogenase deficiency|Congenital adrenal hyperplasia	germline	germline	GRCh37	NC_000001.10	1	119964788	119964788	na	na	1p12	criteria provided, multiple submitters, no conflicts	3	-	N	ClinGen:CA121933,UniProtKB:P26439#VAR_015411,OMIM:613890.0008	3	12191	119964788	C	A	HSD3B2:NM_000198:exon4:c.C664A:p.P222T,HSD3B2:NM_001166120:exon4:c.C664A:p.P222T	0.001	pathogenic	0.072	benign	0.997	pathogenic	0.958	pathogenic	1.91	pathogenic	0.99	pathogenic	-2.37	pathogenic
HSD3B2	27231	single nucleotide variant	NM_000198.4(HSD3B2):c.776C>T (p.Thr259Met)	3284	HSD3B2	HGNC:5218	Pathogenic/Likely pathogenic	1	Aug 22, 2022	80358221	-	RCV000012975|RCV001039417|RCV002222349	MONDO:MONDO:0008727,MeSH:C538236,MedGen:C0342471,OMIM:201810,Orphanet:90791|MedGen:CN517202|Human Phenotype Ontology:HP:0008258,MONDO:MONDO:0018479,MedGen:C0001627,Orphanet:418	3 beta-Hydroxysteroid dehydrogenase deficiency|not provided|Congenital adrenal hyperplasia	germline;unknown	germline	GRCh37	NC_000001.10	1	119964900	119964900	na	na	1p12	criteria provided, multiple submitters, no conflicts	5	-	N	ClinGen:CA121935,UniProtKB:P26439#VAR_010534,OMIM:613890.0009	3	12192	119964900	C	T	HSD3B2:NM_000198:exon4:c.C776T:p.T259M,HSD3B2:NM_001166120:exon4:c.C776T:p.T259M	0.0	pathogenic	0.001	pathogenic	1.0	pathogenic	0.999	pathogenic	3.83	pathogenic	0.97	pathogenic	-1.97	pathogenic
NTRK1	27347	single nucleotide variant	NM_002529.4(NTRK1):c.1838G>T (p.Gly613Val)	4914	NTRK1	HGNC:8031	Benign/Likely benign	1	Nov 04, 2022	6339	-	RCV000013101|RCV000031916|RCV000127263|RCV000712454	MONDO:MONDO:0007958,MedGen:C1833921,OMIM:155240,Orphanet:653,Orphanet:99361|MONDO:MONDO:0009746,MedGen:C0020074,OMIM:256800,Orphanet:642|MedGen:CN169374|MedGen:CN517202	Familial medullary thyroid carcinoma|Hereditary insensitivity to pain with anhidrosis|not specified|not provided	germline;unknown	germline	GRCh37	NC_000001.10	1	156848946	156848946	na	na	1q23.1	criteria provided, multiple submitters, no conflicts	16	-	N	ClinVar:12304,OMIM:191315.0009,OMIM:191315.0005,ClinGen:CA256281	3	12308	156848946	G	T	NTRK1:NM_001012331:exon14:c.G1820T:p.G607V,NTRK1:NM_001007792:exon15:c.G1730T:p.G577V,NTRK1:NM_002529:exon15:c.G1838T:p.G613V	0.023	pathogenic	0.084	benign	0.379	benign	0.129	benign	1.37	pathogenic	0.44	benign	-2.4	pathogenic
NTRK1	27349	single nucleotide variant	NM_002529.4(NTRK1):c.2084C>T (p.Pro695Leu)	4914	NTRK1	HGNC:8031	Pathogenic	1	Aug 18, 2022	121964868	-	RCV000013103	MONDO:MONDO:0009746,MedGen:C0020074,OMIM:256800,Orphanet:642	Hereditary insensitivity to pain with anhidrosis	germline	germline	GRCh37	NC_000001.10	1	156849828	156849828	na	na	1q23.1	criteria provided, single submitter	3	-	N	ClinGen:CA256288,OMIM:191315.0011	3	12310	156849828	C	T	NTRK1:NM_001012331:exon15:c.C2066T:p.P689L,NTRK1:NM_001007792:exon16:c.C1976T:p.P659L,NTRK1:NM_002529:exon16:c.C2084T:p.P695L	0.0	pathogenic	0.0	pathogenic	1.0	pathogenic	0.996	pathogenic	3.155	pathogenic	0.97	pathogenic	-2.56	pathogenic
NTRK1	27351	single nucleotide variant	NM_002529.4(NTRK1):c.1759A>G (p.Met587Val)	4914	NTRK1	HGNC:8031	Pathogenic	1	Sep 01, 2021	121964870	-	RCV000013105	MONDO:MONDO:0009746,MedGen:C0020074,OMIM:256800,Orphanet:642	Hereditary insensitivity to pain with anhidrosis	germline	germline	GRCh37	NC_000001.10	1	156846318	156846318	na	na	1q23.1	criteria provided, single submitter	2	-	N	ClinGen:CA256300,OMIM:191315.0013	3	12312	156846318	A	G	NTRK1:NM_001012331:exon13:c.A1741G:p.M581V,NTRK1:NM_001007792:exon14:c.A1651G:p.M551V,NTRK1:NM_002529:exon14:c.A1759G:p.M587V	0.001	pathogenic	0.004	pathogenic	0.992	pathogenic	0.987	pathogenic	0.465	benign	0.97	pathogenic	-1.44	benign
TP53	27386	single nucleotide variant	NM_000546.6(TP53):c.742C>T (p.Arg248Trp)	7157	TP53	HGNC:11998	Pathogenic	1	Aug 28, 2019	121912651	-	RCV000013140|RCV000115735|RCV000168242|RCV000213057|RCV000418495|RCV000419032|RCV000419150|RCV000423184|RCV000423804|RCV000424308|RCV000424415|RCV000419857|RCV000425083|RCV000429884|RCV000431508|RCV000431689|RCV000425682|RCV000434504|RCV000435803|RCV000429777|RCV000430543|RCV000438698|RCV000433905|RCV000444845|RCV000440422|RCV000441091|RCV000441557|RCV000442243|RCV000436398|RCV000440560|RCV000735…	Gene:553989,MedGen:C1835398,OMIM:151623,Orphanet:524|MONDO:MONDO:0015356,MeSH:D009386,MedGen:C0027672,Orphanet:140162|MONDO:MONDO:0018875,MedGen:C0085390,OMIM:PS151623,Orphanet:524|MedGen:C3661900|Human Phenotype Ontology:HP:0001914,Human Phenotype Ontology:HP:0004808,Human Phenotype Ontology:HP:0004843,Human Phenotype Ontology:HP:0005516,Human Phenotype Ontology:HP:0006724,Human Phenotype Ontolo…	Li-Fraumeni syndrome 1|Hereditary cancer-predisposing syndrome|Li-Fraumeni syndrome|not provided|Acute myeloid leukemia|Lung adenocarcinoma|Glioblastoma|Squamous cell carcinoma of the head and neck|Chronic lymphatic leukemia|Brainstem glioma|Ovarian serous cystadenocarcinoma|Small cell lung carcinoma|Myelodysplastic syndrome|Esophageal carcinoma|Multiple myeloma|Uterine carcinosarcoma|Prostate ad…	germline;somatic;unknown	germline/somatic	GRCh37	NC_000017.10	17	7577539	7577539	na	na	17p13.1	reviewed by expert panel	28	ACMG2013,ACMG2016,ACMG2021,ACMG2022	N	ClinGen:CA000382,UniProtKB:P04637#VAR_005984,OMIM:191170.0001	3	12347	7577539	G	A	TP53:NM_001126115:exon3:c.C346T:p.R116W,TP53:NM_001126116:exon3:c.C346T:p.R116W,TP53:NM_001126117:exon3:c.C346T:p.R116W,TP53:NM_001276697:exon3:c.C265T:p.R89W,TP53:NM_001276698:exon3:c.C265T:p.R89W,TP53:NM_001276699:exon3:c.C265T:p.R89W,TP53:NM_001126118:exon6:c.C625T:p.R209W,TP53:NM_000546:exon7:c.C742T:p.R248W,TP53:NM_001126112:exon7:c.C742T:p.R248W,TP53:NM_001126113:exon7:c.C742T:p.R248W,TP53:…	0.0	pathogenic	0.0	pathogenic	1.0	pathogenic	1.0	pathogenic	3.28	pathogenic	1.0	pathogenic	-7.34	pathogenic
TP53	27387	single nucleotide variant	NM_000546.6(TP53):c.772G>A (p.Glu258Lys)	7157	TP53	HGNC:11998	Pathogenic/Likely pathogenic	1	Sep 30, 2022	121912652	-	RCV000013141|RCV000161071|RCV000582699|RCV000772122|RCV000785291|RCV000792895	Gene:553989,MedGen:C1835398,OMIM:151623,Orphanet:524|MedGen:C3661900|MedGen:CN169374|MONDO:MONDO:0015356,MeSH:D009386,MedGen:C0027672,Orphanet:140162|Human Phenotype Ontology:HP:0100615,MONDO:MONDO:0021068,MeSH:D010051,MedGen:C0919267,OMIM:167000|MONDO:MONDO:0018875,MedGen:C0085390,OMIM:PS151623,Orphanet:524	Li-Fraumeni syndrome 1|not provided|not specified|Hereditary cancer-predisposing syndrome|Neoplasm of ovary|Li-Fraumeni syndrome	germline;somatic;unknown	germline/somatic	GRCh37	NC_000017.10	17	7577509	7577509	na	na	17p13.1	criteria provided, multiple submitters, no conflicts	9	ACMG2013,ACMG2016,ACMG2021,ACMG2022	N	ClinGen:CA000406,UniProtKB:P04637#VAR_005991,OMIM:191170.0002	3	12348	7577509	C	T	TP53:NM_001126115:exon3:c.G376A:p.E126K,TP53:NM_001126116:exon3:c.G376A:p.E126K,TP53:NM_001126117:exon3:c.G376A:p.E126K,TP53:NM_001276697:exon3:c.G295A:p.E99K,TP53:NM_001276698:exon3:c.G295A:p.E99K,TP53:NM_001276699:exon3:c.G295A:p.E99K,TP53:NM_001126118:exon6:c.G655A:p.E219K,TP53:NM_000546:exon7:c.G772A:p.E258K,TP53:NM_001126112:exon7:c.G772A:p.E258K,TP53:NM_001126113:exon7:c.G772A:p.E258K,TP53:…	0.0	pathogenic	0.002	pathogenic	1.0	pathogenic	1.0	pathogenic	3.285	pathogenic	1.0	pathogenic	-7.21	pathogenic
TP53	27388	single nucleotide variant	NM_000546.6(TP53):c.733G>T (p.Gly245Cys)	7157	TP53	HGNC:11998	Pathogenic	1	Jun 18, 2022	28934575	-	RCV000013142|RCV000161025|RCV000417593|RCV000419737|RCV000418673|RCV000426090|RCV000425471|RCV000423577|RCV000424262|RCV000428895|RCV000430002|RCV000436186|RCV000440886|RCV000440197|RCV000436330|RCV000441334|RCV000443435|RCV000492412|RCV000434535|RCV000633397|RCV001271056	Gene:553989,MedGen:C1835398,OMIM:151623,Orphanet:524|MedGen:C3661900|MONDO:MONDO:0006485,MedGen:C0280630|Human Phenotype Ontology:HP:0010623,Human Phenotype Ontology:HP:0100013,MONDO:MONDO:0021100,MeSH:D001943,MedGen:C1458155|Human Phenotype Ontology:HP:0030078,MONDO:MONDO:0005061,MeSH:D000077192,MedGen:C0152013|Human Phenotype Ontology:HP:0006740,MONDO:MONDO:0005611,MedGen:C0279680|MONDO:MONDO:0…	Li-Fraumeni syndrome 1|not provided|Uterine carcinosarcoma|Breast neoplasm|Lung adenocarcinoma|Transitional cell carcinoma of the bladder|Glioblastoma|Ovarian serous cystadenocarcinoma|Gastric adenocarcinoma|Pancreatic adenocarcinoma|Prostate adenocarcinoma|Squamous cell carcinoma of the head and neck|Neoplasm of brain|Esophageal carcinoma|Squamous cell lung carcinoma|Hepatocellular carcinoma|Neo…	germline;somatic	germline/somatic	GRCh37	NC_000017.10	17	7577548	7577548	na	na	17p13.1	criteria provided, multiple submitters, no conflicts	7	ACMG2013,ACMG2016,ACMG2021,ACMG2022	N	ClinGen:CA000369,UniProtKB:P04637#VAR_005972,OMIM:191170.0003	3	12349	7577548	C	A	TP53:NM_001126115:exon3:c.G337T:p.G113C,TP53:NM_001126116:exon3:c.G337T:p.G113C,TP53:NM_001126117:exon3:c.G337T:p.G113C,TP53:NM_001276697:exon3:c.G256T:p.G86C,TP53:NM_001276698:exon3:c.G256T:p.G86C,TP53:NM_001276699:exon3:c.G256T:p.G86C,TP53:NM_001126118:exon6:c.G616T:p.G206C,TP53:NM_000546:exon7:c.G733T:p.G245C,TP53:NM_001126112:exon7:c.G733T:p.G245C,TP53:NM_001126113:exon7:c.G733T:p.G245C,TP53:…	0.0	pathogenic	0.0	pathogenic	1.0	pathogenic	1.0	pathogenic	3.31	pathogenic	0.99	pathogenic	-7.65	pathogenic
TP53	27390	single nucleotide variant	NM_000546.6(TP53):c.215C>G (p.Pro72Arg)	7157	TP53	HGNC:11998	Benign	1	Nov 28, 2022	1042522	-	RCV000013144|RCV000034639|RCV000079202|RCV000132165|RCV000144668|RCV000300782|RCV001255631|RCV002225263|RCV002496335|RCV002510562	|MedGen:C3661900|MedGen:CN169374|MONDO:MONDO:0015356,MeSH:D009386,MedGen:C0027672,Orphanet:140162|Gene:553989,MedGen:C1835398,OMIM:151623,Orphanet:524|MONDO:MONDO:0018875,MedGen:C0085390,OMIM:PS151623,Orphanet:524|MONDO:MONDO:0023644,MedGen:C0220641|MONDO:MONDO:0003582,MeSH:D061325,MedGen:C0677776,Orphanet:145|12 conditions|Human Phenotype Ontology:HP:0001914,Human Phenotype Ontology:HP:0004808,H…	CODON 72 POLYMORPHISM|not provided|not specified|Hereditary cancer-predisposing syndrome|Li-Fraumeni syndrome 1|Li-Fraumeni syndrome|Lip and oral cavity carcinoma|Hereditary breast ovarian cancer syndrome|12 conditions|Acute myeloid leukemia	germline;somatic;unknown	germline/somatic	GRCh37	NC_000017.10	17	7579472	7579472	na	na	17p13.1	criteria provided, multiple submitters, no conflicts	26	ACMG2013,ACMG2016,ACMG2021,ACMG2022	N	PharmGKB Clinical Annotation:655386635,ClinGen:CA000072,UniProtKB:P04637#VAR_005856,OMIM:191170.0005	3	12351	7579472	G	C	TP53:NM_001126118:exon3:c.C98G:p.P33R,TP53:NM_000546:exon4:c.C215G:p.P72R,TP53:NM_001126112:exon4:c.C215G:p.P72R,TP53:NM_001126113:exon4:c.C215G:p.P72R,TP53:NM_001126114:exon4:c.C215G:p.P72R,TP53:NM_001276695:exon4:c.C98G:p.P33R,TP53:NM_001276696:exon4:c.C98G:p.P33R,TP53:NM_001276760:exon4:c.C98G:p.P33R,TP53:NM_001276761:exon4:c.C98G:p.P33R	0.244	benign	0.411	benign	0.745	pathogenic	0.372	benign	1.355	pathogenic	0.01	benign	-5.23	pathogenic
TP53	27391	single nucleotide variant	NM_000546.6(TP53):c.747G>T (p.Arg249Ser)	7157	TP53	HGNC:11998	Pathogenic/Likely pathogenic	1	Jul 27, 2022	28934571	-	RCV000013145|RCV000013146|RCV000464372|RCV000579519|RCV000785491|RCV001270276|RCV001562247	Human Phenotype Ontology:HP:0001402,Human Phenotype Ontology:HP:0002899,Human Phenotype Ontology:HP:0003007,Human Phenotype Ontology:HP:0006750,MONDO:MONDO:0007256,MedGen:C2239176,OMIM:114550,Orphanet:88673|Human Phenotype Ontology:HP:0030079,MONDO:MONDO:0002974,MedGen:C4048328,OMIM:603956|MONDO:MONDO:0018875,MedGen:C0085390,OMIM:PS151623,Orphanet:524|MONDO:MONDO:0015356,MeSH:D009386,MedGen:C0027…	Hepatocellular carcinoma|Cervix cancer|Li-Fraumeni syndrome|Hereditary cancer-predisposing syndrome|Neoplasm of ovary|Squamous cell carcinoma of the head and neck|not provided	germline;somatic	germline/somatic	GRCh37	NC_000017.10	17	7577534	7577534	na	na	17p13.1	criteria provided, multiple submitters, no conflicts	9	ACMG2013,ACMG2016,ACMG2021,ACMG2022	N	ClinGen:CA000392,UniProtKB:P04637#VAR_005986,OMIM:191170.0006	3	12352	7577534	C	A	TP53:NM_001126115:exon3:c.G351T:p.R117S,TP53:NM_001126116:exon3:c.G351T:p.R117S,TP53:NM_001126117:exon3:c.G351T:p.R117S,TP53:NM_001276697:exon3:c.G270T:p.R90S,TP53:NM_001276698:exon3:c.G270T:p.R90S,TP53:NM_001276699:exon3:c.G270T:p.R90S,TP53:NM_001126118:exon6:c.G630T:p.R210S,TP53:NM_000546:exon7:c.G747T:p.R249S,TP53:NM_001126112:exon7:c.G747T:p.R249S,TP53:NM_001126113:exon7:c.G747T:p.R249S,TP53:…	0.007	pathogenic	0.0	pathogenic	1.0	pathogenic	0.992	pathogenic	3.31	pathogenic	1.0	pathogenic	-7.29	pathogenic
TP53	27393	single nucleotide variant	NM_000546.6(TP53):c.725G>A (p.Cys242Tyr)	7157	TP53	HGNC:11998	Pathogenic	1	Jul 13, 2023	121912655	-	RCV000013148|RCV000129809|RCV000231770|RCV000419614|RCV000419041|RCV000424935|RCV000426292|RCV000430302|RCV000432119|RCV000425602|RCV000436867|RCV000436295|RCV000442015|RCV000440992|RCV000785282|RCV002288484|RCV002247332|RCV003314552	MONDO:MONDO:0800290,MedGen:C2675080|MONDO:MONDO:0015356,MeSH:D009386,MedGen:C0027672,Orphanet:140162|MONDO:MONDO:0018875,MedGen:C0085390,OMIM:PS151623,Orphanet:524|Human Phenotype Ontology:HP:0033770,MONDO:MONDO:0005036,MedGen:C0278701|Human Phenotype Ontology:HP:0030359,MONDO:MONDO:0005097,MedGen:C0149782|Human Phenotype Ontology:HP:0006740,MONDO:MONDO:0005611,MedGen:C0279680|Human Phenotype Ont…	Li-fraumeni-like syndrome|Hereditary cancer-predisposing syndrome|Li-Fraumeni syndrome|Gastric adenocarcinoma|Squamous cell lung carcinoma|Transitional cell carcinoma of the bladder|Chronic lymphatic leukemia|Uterine carcinosarcoma|Squamous cell carcinoma of the head and neck|Lung adenocarcinoma|Hepatocellular carcinoma|Breast neoplasm|Glioblastoma|Esophageal carcinoma|Neoplasm of ovary|Li-Fraume…	germline;somatic	germline/somatic	GRCh37	NC_000017.10	17	7577556	7577556	na	na	17p13.1	criteria provided, multiple submitters, no conflicts	9	ACMG2013,ACMG2016,ACMG2021,ACMG2022	N	ClinGen:CA000361,UniProtKB:P04637#VAR_045224,OMIM:191170.0008	3	12354	7577556	C	T	TP53:NM_001126115:exon3:c.G329A:p.C110Y,TP53:NM_001126116:exon3:c.G329A:p.C110Y,TP53:NM_001126117:exon3:c.G329A:p.C110Y,TP53:NM_001276697:exon3:c.G248A:p.C83Y,TP53:NM_001276698:exon3:c.G248A:p.C83Y,TP53:NM_001276699:exon3:c.G248A:p.C83Y,TP53:NM_001126118:exon6:c.G608A:p.C203Y,TP53:NM_000546:exon7:c.G725A:p.C242Y,TP53:NM_001126112:exon7:c.G725A:p.C242Y,TP53:NM_001126113:exon7:c.G725A:p.C242Y,TP53:…	0.0	pathogenic	0.0	pathogenic	1.0	pathogenic	1.0	pathogenic	3.325	pathogenic	1.0	pathogenic	-7.99	pathogenic
TP53	27394	single nucleotide variant	NM_000546.6(TP53):c.734G>A (p.Gly245Asp)	7157	TP53	HGNC:11998	Pathogenic/Likely pathogenic	1	Mar 31, 2023	121912656	-	RCV000013149|RCV000164465|RCV000206683|RCV000419718|RCV000421349|RCV000421831|RCV000422520|RCV000426192|RCV000427250|RCV000429017|RCV000432021|RCV000436871|RCV000431450|RCV000440814|RCV000437916|RCV000444212|RCV000439739|RCV000443515|RCV000444304|RCV000785472|RCV000986053	Gene:553989,MedGen:C1835398,OMIM:151623,Orphanet:524|MONDO:MONDO:0015356,MeSH:D009386,MedGen:C0027672,Orphanet:140162|MONDO:MONDO:0018875,MedGen:C0085390,OMIM:PS151623,Orphanet:524|MONDO:MONDO:0006046,MedGen:C0279663|Human Phenotype Ontology:HP:0006725,MONDO:MONDO:0006047,MedGen:C0281361|Human Phenotype Ontology:HP:0010623,Human Phenotype Ontology:HP:0100013,MONDO:MONDO:0021100,MeSH:D001943,MedGe…	Li-Fraumeni syndrome 1|Hereditary cancer-predisposing syndrome|Li-Fraumeni syndrome|Ovarian serous cystadenocarcinoma|Pancreatic adenocarcinoma|Breast neoplasm|Prostate adenocarcinoma|Neoplasm of brain|Glioblastoma|Squamous cell carcinoma of the head and neck|Brainstem glioma|Lung adenocarcinoma|Neoplasm of the large intestine|Transitional cell carcinoma of the bladder|Uterine carcinosarcoma|Gast…	germline;somatic	germline/somatic	GRCh37	NC_000017.10	17	7577547	7577547	na	na	17p13.1	criteria provided, multiple submitters, no conflicts	9	ACMG2013,ACMG2016,ACMG2021,ACMG2022	N	ClinGen:CA000371,UniProtKB:P04637#VAR_005973,OMIM:191170.0009	3	12355	7577547	C	T	TP53:NM_001126115:exon3:c.G338A:p.G113D,TP53:NM_001126116:exon3:c.G338A:p.G113D,TP53:NM_001126117:exon3:c.G338A:p.G113D,TP53:NM_001276697:exon3:c.G257A:p.G86D,TP53:NM_001276698:exon3:c.G257A:p.G86D,TP53:NM_001276699:exon3:c.G257A:p.G86D,TP53:NM_001126118:exon6:c.G617A:p.G206D,TP53:NM_000546:exon7:c.G734A:p.G245D,TP53:NM_001126112:exon7:c.G734A:p.G245D,TP53:NM_001126113:exon7:c.G734A:p.G245D,TP53:…	0.0	pathogenic	0.0	pathogenic	1.0	pathogenic	1.0	pathogenic	3.31	pathogenic	1.0	pathogenic	-7.62	pathogenic
TP53	27395	single nucleotide variant	NM_000546.6(TP53):c.743G>A (p.Arg248Gln)	7157	TP53	HGNC:11998	Pathogenic	1	Aug 28, 2019	11540652	-	RCV000013150|RCV000115736|RCV000148913|RCV000197114|RCV000235221|RCV000419135|RCV000420303|RCV000421893|RCV000424869|RCV000427709|RCV000417916|RCV000432587|RCV000426606|RCV000426233|RCV000433424|RCV000437935|RCV000428591|RCV000420727|RCV000421194|RCV000430513|RCV000437518|RCV000444656|RCV000426359|RCV000441226|RCV000432778|RCV000435533|RCV000445235|RCV000437291|RCV000438410|RCV000439963|RCV000445…	Gene:553989,MedGen:C1835398,OMIM:151623,Orphanet:524|MONDO:MONDO:0015356,MeSH:D009386,MedGen:C0027672,Orphanet:140162|Human Phenotype Ontology:HP:0100242,MONDO:MONDO:0005089,MedGen:C1261473|MONDO:MONDO:0018875,MedGen:C0085390,OMIM:PS151623,Orphanet:524|MedGen:C3661900|Human Phenotype Ontology:HP:0010623,Human Phenotype Ontology:HP:0100013,MONDO:MONDO:0021100,MeSH:D001943,MedGen:C1458155|Human Phe…	Li-Fraumeni syndrome 1|Hereditary cancer-predisposing syndrome|Sarcoma|Li-Fraumeni syndrome|not provided|Breast neoplasm|Small cell lung carcinoma|Neoplasm of the large intestine|Multiple myeloma|Medulloblastoma|Acute myeloid leukemia|Uterine carcinosarcoma|Neoplasm|Prostate adenocarcinoma|Brainstem glioma|Myelodysplastic syndrome|Gastric adenocarcinoma|Malignant melanoma of skin|Ovarian serous c…	de novo;germline;maternal;somatic;unknown	germline/somatic	GRCh37	NC_000017.10	17	7577538	7577538	na	na	17p13.1	reviewed by expert panel	36	ACMG2013,ACMG2016,ACMG2021,ACMG2022	N	ClinGen:CA000387,UniProtKB:P04637#VAR_005983,OMIM:191170.0010	3	12356	7577538	C	T	TP53:NM_001126115:exon3:c.G347A:p.R116Q,TP53:NM_001126116:exon3:c.G347A:p.R116Q,TP53:NM_001126117:exon3:c.G347A:p.R116Q,TP53:NM_001276697:exon3:c.G266A:p.R89Q,TP53:NM_001276698:exon3:c.G266A:p.R89Q,TP53:NM_001276699:exon3:c.G266A:p.R89Q,TP53:NM_001126118:exon6:c.G626A:p.R209Q,TP53:NM_000546:exon7:c.G743A:p.R248Q,TP53:NM_001126112:exon7:c.G743A:p.R248Q,TP53:NM_001126113:exon7:c.G743A:p.R248Q,TP53:…	0.005	pathogenic	0.001	pathogenic	1.0	pathogenic	0.999	pathogenic	2.935	pathogenic	1.0	pathogenic	-7.28	pathogenic
TP53	27396	single nucleotide variant	NM_000546.6(TP53):c.398T>C (p.Met133Thr)	7157	TP53	HGNC:11998	Pathogenic	1	Jun 18, 2022	28934873	-	RCV000013151|RCV000492130|RCV001383051	Gene:553989,MedGen:C1835398,OMIM:151623,Orphanet:524|MONDO:MONDO:0015356,MeSH:D009386,MedGen:C0027672,Orphanet:140162|MONDO:MONDO:0018875,MedGen:C0085390,OMIM:PS151623,Orphanet:524	Li-Fraumeni syndrome 1|Hereditary cancer-predisposing syndrome|Li-Fraumeni syndrome	germline	germline	GRCh37	NC_000017.10	17	7578532	7578532	na	na	17p13.1	criteria provided, multiple submitters, no conflicts	4	ACMG2013,ACMG2016,ACMG2021,ACMG2022	N	ClinGen:CA000158,UniProtKB:P04637#VAR_005875,OMIM:191170.0011	3	12357	7578532	A	G	TP53:NM_001126115:exon1:c.T2C:p.M1T,TP53:NM_001126116:exon1:c.T2C:p.M1T,TP53:NM_001126117:exon1:c.T2C:p.M1T,TP53:NM_001126118:exon4:c.T281C:p.M94T,TP53:NM_000546:exon5:c.T398C:p.M133T,TP53:NM_001126112:exon5:c.T398C:p.M133T,TP53:NM_001126113:exon5:c.T398C:p.M133T,TP53:NM_001126114:exon5:c.T398C:p.M133T,TP53:NM_001276695:exon5:c.T281C:p.M94T,TP53:NM_001276696:exon5:c.T281C:p.M94T,TP53:NM_001276760…	0.0	pathogenic	0.0	pathogenic	0.674	pathogenic	0.858	pathogenic	0.0	benign	1.0	pathogenic	-6.7	pathogenic
TP53	27397	single nucleotide variant	NM_000546.6(TP53):c.814G>T (p.Val272Leu)	7157	TP53	HGNC:11998	Likely pathogenic	1	Oct 18, 2022	121912657	-	RCV000013152|RCV000164988|RCV000417682|RCV000420507|RCV000427077|RCV000428361|RCV000432989|RCV000426429|RCV000437706|RCV000439021|RCV000443589|RCV000431193|RCV000434905|RCV000437100|RCV000443570|RCV001221969	Gene:553989,MedGen:C1835398,OMIM:151623,Orphanet:524|MONDO:MONDO:0015356,MeSH:D009386,MedGen:C0027672,Orphanet:140162|Human Phenotype Ontology:HP:0033770,MONDO:MONDO:0005036,MedGen:C0278701|Human Phenotype Ontology:HP:0010623,Human Phenotype Ontology:HP:0100013,MONDO:MONDO:0021100,MeSH:D001943,MedGen:C1458155|Human Phenotype Ontology:HP:0006739,Human Phenotype Ontology:HP:0007614,MONDO:MONDO:0002…	Li-Fraumeni syndrome 1|Hereditary cancer-predisposing syndrome|Gastric adenocarcinoma|Breast neoplasm|Squamous cell carcinoma of the skin|Transitional cell carcinoma of the bladder|Ovarian serous cystadenocarcinoma|Squamous cell carcinoma of the head and neck|Medulloblastoma|Lung adenocarcinoma|Multiple myeloma|Neoplasm of the large intestine|Pancreatic adenocarcinoma|Papillary renal cell carcino…	germline;somatic	germline/somatic	GRCh37	NC_000017.10	17	7577124	7577124	na	na	17p13.1	criteria provided, multiple submitters, no conflicts	5	ACMG2013,ACMG2016,ACMG2021,ACMG2022	N	ClinGen:CA000430,UniProtKB:P04637#VAR_005992,OMIM:191170.0012	3	12358	7577124	C	A	TP53:NM_001126115:exon4:c.G418T:p.V140L,TP53:NM_001126116:exon4:c.G418T:p.V140L,TP53:NM_001126117:exon4:c.G418T:p.V140L,TP53:NM_001276697:exon4:c.G337T:p.V113L,TP53:NM_001276698:exon4:c.G337T:p.V113L,TP53:NM_001276699:exon4:c.G337T:p.V113L,TP53:NM_001126118:exon7:c.G697T:p.V233L,TP53:NM_000546:exon8:c.G814T:p.V272L,TP53:NM_001126112:exon8:c.G814T:p.V272L,TP53:NM_001126113:exon8:c.G814T:p.V272L,TP…	0.003	pathogenic	0.035	pathogenic	0.998	pathogenic	0.976	pathogenic	3.175	pathogenic	1.0	pathogenic	-6.96	pathogenic
TP53	27398	single nucleotide variant	NM_000546.6(TP53):c.722C>T (p.Ser241Phe)	7157	TP53	HGNC:11998	Pathogenic/Likely pathogenic	1	Aug 03, 2022	28934573	-	RCV000013154|RCV000013153|RCV000130168|RCV000417576|RCV000418653|RCV000421750|RCV000422867|RCV000423921|RCV000426907|RCV000430665|RCV000433125|RCV000426268|RCV000428255|RCV000429321|RCV000435867|RCV000434173|RCV000436959|RCV000438965|RCV000436527|RCV000441398|RCV000441622|RCV000444801|RCV000559355|RCV000785290|RCV001255673|RCV002288485|RCV002496336|RCV003114189	MONDO:MONDO:0002629,MedGen:C0585442,OMIM:259500,Orphanet:668|Human Phenotype Ontology:HP:0002884,MONDO:MONDO:0018666,MedGen:C0206624,Orphanet:449|MONDO:MONDO:0015356,MeSH:D009386,MedGen:C0027672,Orphanet:140162|Human Phenotype Ontology:HP:0006739,Human Phenotype Ontology:HP:0007614,MONDO:MONDO:0002529,MedGen:C0553723|Human Phenotype Ontology:HP:0012539,MONDO:MONDO:0018908,MedGen:C0024305,Orphanet…	Bone osteosarcoma|Hepatoblastoma|Hereditary cancer-predisposing syndrome|Squamous cell carcinoma of the skin|Non-Hodgkin lymphoma|Brainstem glioma|Esophageal carcinoma|Breast neoplasm|Uterine carcinosarcoma|Papillary renal cell carcinoma, sporadic|Neoplasm of brain|Squamous cell carcinoma of the head and neck|Lung adenocarcinoma|Malignant melanoma of skin|Malignant neoplasm of body of uterus|Glio…	germline;somatic;unknown	germline/somatic	GRCh37	NC_000017.10	17	7577559	7577559	na	na	17p13.1	criteria provided, multiple submitters, no conflicts	9	ACMG2013,ACMG2016,ACMG2021,ACMG2022	N	ClinGen:CA000359,UniProtKB:P04637#VAR_005969,OMIM:191170.0013	3	12359	7577559	G	A	TP53:NM_001126115:exon3:c.C326T:p.S109F,TP53:NM_001126116:exon3:c.C326T:p.S109F,TP53:NM_001126117:exon3:c.C326T:p.S109F,TP53:NM_001276697:exon3:c.C245T:p.S82F,TP53:NM_001276698:exon3:c.C245T:p.S82F,TP53:NM_001276699:exon3:c.C245T:p.S82F,TP53:NM_001126118:exon6:c.C605T:p.S202F,TP53:NM_000546:exon7:c.C722T:p.S241F,TP53:NM_001126112:exon7:c.C722T:p.S241F,TP53:NM_001126113:exon7:c.C722T:p.S241F,TP53:…	0.0	pathogenic	0.0	pathogenic	1.0	pathogenic	1.0	pathogenic	3.325	pathogenic	1.0	pathogenic	-7.22	pathogenic
TP53	27403	single nucleotide variant	NM_000546.6(TP53):c.844C>T (p.Arg282Trp)	7157	TP53	HGNC:11998	Pathogenic/Likely pathogenic	1	Jul 07, 2023	28934574	-	RCV000013161|RCV000144670|RCV000148905|RCV000210145|RCV000236400|RCV000417906|RCV000420798|RCV000423580|RCV000425909|RCV000422920|RCV000426680|RCV000430759|RCV000424430|RCV000431084|RCV000433225|RCV000432561|RCV000435581|RCV000436175|RCV000437607|RCV000441472|RCV000442231|RCV000444687|RCV000444544|RCV000434706|RCV000722016|RCV000785546|RCV001270278|RCV003315223	MONDO:MONDO:0800290,MedGen:C2675080|Gene:553989,MedGen:C1835398,OMIM:151623,Orphanet:524|MONDO:MONDO:0018875,MedGen:C0085390,OMIM:PS151623,Orphanet:524|MONDO:MONDO:0015356,MeSH:D009386,MedGen:C0027672,Orphanet:140162|MedGen:C3661900|Human Phenotype Ontology:HP:0012539,MONDO:MONDO:0018908,MedGen:C0024305,Orphanet:547|Human Phenotype Ontology:HP:0012056,MONDO:MONDO:0005012,MeSH:C562393,MedGen:C0151…	Li-fraumeni-like syndrome|Li-Fraumeni syndrome 1|Li-Fraumeni syndrome|Hereditary cancer-predisposing syndrome|not provided|Non-Hodgkin lymphoma|Malignant melanoma of skin|Squamous cell lung carcinoma|Ovarian serous cystadenocarcinoma|Glioblastoma|Prostate adenocarcinoma|Neoplasm of the large intestine|Squamous cell carcinoma of the skin|Hepatocellular carcinoma|Breast neoplasm|Transitional cell c…	germline;maternal;somatic;unknown	germline/somatic	GRCh37	NC_000017.10	17	7577094	7577094	na	na	17p13.1	criteria provided, multiple submitters, no conflicts	29	ACMG2013,ACMG2016,ACMG2021,ACMG2022	N	ClinGen:CA000454,UniProtKB:P04637#VAR_006016,OMIM:191170.0018	3	12364	7577094	G	A	TP53:NM_001126115:exon4:c.C448T:p.R150W,TP53:NM_001126116:exon4:c.C448T:p.R150W,TP53:NM_001126117:exon4:c.C448T:p.R150W,TP53:NM_001276697:exon4:c.C367T:p.R123W,TP53:NM_001276698:exon4:c.C367T:p.R123W,TP53:NM_001276699:exon4:c.C367T:p.R123W,TP53:NM_001126118:exon7:c.C727T:p.R243W,TP53:NM_000546:exon8:c.C844T:p.R282W,TP53:NM_001126112:exon8:c.C844T:p.R282W,TP53:NM_001126113:exon8:c.C844T:p.R282W,TP…	0.002	pathogenic	0.0	pathogenic	1.0	pathogenic	1.0	pathogenic	3.145	pathogenic	1.0	pathogenic	-7.34	pathogenic
TP53	27404	single nucleotide variant	NM_000546.6(TP53):c.733G>A (p.Gly245Ser)	7157	TP53	HGNC:11998	Pathogenic	1	Aug 28, 2019	28934575	-	RCV000013162|RCV000144669|RCV000130147|RCV000148909|RCV000154014|RCV000226657|RCV000421457|RCV000417419|RCV000420452|RCV000432898|RCV000426990|RCV000430925|RCV000432120|RCV000425581|RCV000419767|RCV000437643|RCV000442506|RCV000426307|RCV000436979|RCV000428113|RCV000438801|RCV000442529|RCV000438107|RCV000588736|RCV000587017|RCV000785316|RCV001270274|RCV001354825|RCV001642222|RCV002496337|RCV003332…	MONDO:MONDO:0800290,MedGen:C2675080|Gene:553989,MedGen:C1835398,OMIM:151623,Orphanet:524|MONDO:MONDO:0015356,MeSH:D009386,MedGen:C0027672,Orphanet:140162|MONDO:MONDO:0004970,MedGen:C0001418|MedGen:C3661900|MONDO:MONDO:0018875,MedGen:C0085390,OMIM:PS151623,Orphanet:524|Human Phenotype Ontology:HP:0030078,MONDO:MONDO:0005061,MeSH:D000077192,MedGen:C0152013|MONDO:MONDO:0005082,MedGen:C0007112|MONDO:…	Li-fraumeni-like syndrome|Li-Fraumeni syndrome 1|Hereditary cancer-predisposing syndrome|Adenocarcinoma|not provided|Li-Fraumeni syndrome|Lung adenocarcinoma|Prostate adenocarcinoma|Glioblastoma|Transitional cell carcinoma of the bladder|Squamous cell lung carcinoma|Neoplasm of brain|Gastric adenocarcinoma|Neoplasm|Squamous cell carcinoma of the head and neck|Pancreatic adenocarcinoma|Ovarian ser…	germline;paternal;somatic;unknown	germline/somatic	GRCh37	NC_000017.10	17	7577548	7577548	na	na	17p13.1	reviewed by expert panel	30	ACMG2013,ACMG2016,ACMG2021,ACMG2022	N	ClinGen:CA000367,UniProtKB:P04637#VAR_005974,OMIM:191170.0019	3	12365	7577548	C	T	TP53:NM_001126115:exon3:c.G337A:p.G113S,TP53:NM_001126116:exon3:c.G337A:p.G113S,TP53:NM_001126117:exon3:c.G337A:p.G113S,TP53:NM_001276697:exon3:c.G256A:p.G86S,TP53:NM_001276698:exon3:c.G256A:p.G86S,TP53:NM_001276699:exon3:c.G256A:p.G86S,TP53:NM_001126118:exon6:c.G616A:p.G206S,TP53:NM_000546:exon7:c.G733A:p.G245S,TP53:NM_001126112:exon7:c.G733A:p.G245S,TP53:NM_001126113:exon7:c.G733A:p.G245S,TP53:…	0.003	pathogenic	0.0	pathogenic	1.0	pathogenic	1.0	pathogenic	2.62	pathogenic	1.0	pathogenic	-7.58	pathogenic
TP53	27405	single nucleotide variant	NM_000546.6(TP53):c.818G>A (p.Arg273His)	7157	TP53	HGNC:11998	Pathogenic	1	Aug 28, 2019	28934576	-	RCV000013163|RCV000013164|RCV000115738|RCV000254693|RCV000424833|RCV000419960|RCV000428779|RCV000429822|RCV000424109|RCV000424627|RCV000433409|RCV000435547|RCV000423826|RCV000431361|RCV000437210|RCV000418930|RCV000434044|RCV000430161|RCV000436207|RCV000422097|RCV000422733|RCV000424218|RCV000441169|RCV000440474|RCV000444851|RCV000444900|RCV000439513|RCV000440815|RCV000443907|RCV000463420|RCV000785…	Gene:553989,MedGen:C1835398,OMIM:151623,Orphanet:524|Human Phenotype Ontology:HP:0011779,MONDO:MONDO:0006468,MedGen:C0238461,Orphanet:142|MONDO:MONDO:0015356,MeSH:D009386,MedGen:C0027672,Orphanet:140162|MedGen:C3661900|Human Phenotype Ontology:HP:0006775,MONDO:MONDO:0009693,MeSH:D009101,MedGen:C0026764,OMIM:254500,Orphanet:29073,Orphanet:85443|Human Phenotype Ontology:HP:0033770,MONDO:MONDO:00050…	Li-Fraumeni syndrome 1|Thyroid gland undifferentiated (anaplastic) carcinoma|Hereditary cancer-predisposing syndrome|not provided|Multiple myeloma|Gastric adenocarcinoma|Ovarian serous cystadenocarcinoma|Transitional cell carcinoma of the bladder|Chronic lymphatic leukemia|Adrenal cortex carcinoma|Malignant melanoma of skin|Esophageal carcinoma|Uterine carcinosarcoma|Lung adenocarcinoma|Small cel…	germline;somatic;unknown	germline/somatic	GRCh37	NC_000017.10	17	7577120	7577120	na	na	17p13.1	reviewed by expert panel	31	ACMG2013,ACMG2016,ACMG2021,ACMG2022	N	ClinGen:CA000434,UniProtKB:P04637#VAR_005995,OMIM:191170.0020	3	12366	7577120	C	T	TP53:NM_001126115:exon4:c.G422A:p.R141H,TP53:NM_001126116:exon4:c.G422A:p.R141H,TP53:NM_001126117:exon4:c.G422A:p.R141H,TP53:NM_001276697:exon4:c.G341A:p.R114H,TP53:NM_001276698:exon4:c.G341A:p.R114H,TP53:NM_001276699:exon4:c.G341A:p.R114H,TP53:NM_001126118:exon7:c.G701A:p.R234H,TP53:NM_000546:exon8:c.G818A:p.R273H,TP53:NM_001126112:exon8:c.G818A:p.R273H,TP53:NM_001126113:exon8:c.G818A:p.R273H,TP…	0.007	pathogenic	0.026	pathogenic	1.0	pathogenic	0.989	pathogenic	2.08	pathogenic	1.0	pathogenic	-7.32	pathogenic
TP53	27407	single nucleotide variant	NM_000546.6(TP53):c.839G>C (p.Arg280Thr)	7157	TP53	HGNC:11998	Pathogenic/Likely pathogenic	1	Aug 05, 2021	121912660	-	RCV000013167|RCV000198779|RCV000418209|RCV000420086|RCV000422446|RCV000424688|RCV000422958|RCV000423074|RCV000428404|RCV000429718|RCV000431210|RCV000432716|RCV000432461|RCV000434981|RCV000441513|RCV000440816|RCV000437764|RCV000445307|RCV000441912|RCV002433452|RCV003332081	MONDO:MONDO:0015459,MedGen:C2931822,OMIM:607107,Orphanet:150|MONDO:MONDO:0018875,MedGen:C0085390,OMIM:PS151623,Orphanet:524|Human Phenotype Ontology:HP:0030357,MONDO:MONDO:0008433,MeSH:D055752,MedGen:C0149925,OMIM:182280,Orphanet:70573|Human Phenotype Ontology:HP:0001402,Human Phenotype Ontology:HP:0002899,Human Phenotype Ontology:HP:0003007,Human Phenotype Ontology:HP:0006750,MONDO:MONDO:0007256…	Nasopharyngeal carcinoma|Li-Fraumeni syndrome|Small cell lung carcinoma|Hepatocellular carcinoma|Neoplasm of uterine cervix|Squamous cell carcinoma of the head and neck|Breast neoplasm|Acute myeloid leukemia|Ovarian serous cystadenocarcinoma|Squamous cell carcinoma of the skin|Transitional cell carcinoma of the bladder|Squamous cell lung carcinoma|Gastric adenocarcinoma|Malignant melanoma of skin…	germline;somatic	germline/somatic	GRCh37	NC_000017.10	17	7577099	7577099	na	na	17p13.1	criteria provided, multiple submitters, no conflicts	6	ACMG2013,ACMG2016,ACMG2021,ACMG2022	N	ClinGen:CA000445,UniProtKB:P04637#VAR_006009,OMIM:191170.0024	3	12368	7577099	C	G	TP53:NM_001126115:exon4:c.G443C:p.R148T,TP53:NM_001126116:exon4:c.G443C:p.R148T,TP53:NM_001126117:exon4:c.G443C:p.R148T,TP53:NM_001276697:exon4:c.G362C:p.R121T,TP53:NM_001276698:exon4:c.G362C:p.R121T,TP53:NM_001276699:exon4:c.G362C:p.R121T,TP53:NM_001126118:exon7:c.G722C:p.R241T,TP53:NM_000546:exon8:c.G839C:p.R280T,TP53:NM_001126112:exon8:c.G839C:p.R280T,TP53:NM_001126113:exon8:c.G839C:p.R280T,TP…	0.0	pathogenic	0.0	pathogenic	1.0	pathogenic	1.0	pathogenic	3.285	pathogenic	1.0	pathogenic	-7.3	pathogenic
TP53	27408	single nucleotide variant	NM_000546.6(TP53):c.451C>A (p.Pro151Thr)	7157	TP53	HGNC:11998	Pathogenic/Likely pathogenic	1	Aug 15, 2023	28934874	-	RCV000013168|RCV000130617|RCV000417493|RCV000418145|RCV000422094|RCV000423161|RCV000424222|RCV000425139|RCV000428384|RCV000428836|RCV000429500|RCV000437544|RCV000433405|RCV000435159|RCV000442802|RCV000443817|RCV000434485|RCV000439740|RCV000440812|RCV000520731|RCV000691152|RCV001257524|RCV002288486	MONDO:MONDO:0004988,MedGen:C0858252|MONDO:MONDO:0015356,MeSH:D009386,MedGen:C0027672,Orphanet:140162|Human Phenotype Ontology:HP:0012056,MONDO:MONDO:0005012,MeSH:C562393,MedGen:C0151779|Human Phenotype Ontology:HP:0033770,MONDO:MONDO:0005036,MedGen:C0278701|Human Phenotype Ontology:HP:0030359,MONDO:MONDO:0005097,MedGen:C0149782|MONDO:MONDO:0006046,MedGen:C0279663|Human Phenotype Ontology:HP:00114…	Breast adenocarcinoma|Hereditary cancer-predisposing syndrome|Malignant melanoma of skin|Gastric adenocarcinoma|Squamous cell lung carcinoma|Ovarian serous cystadenocarcinoma|Esophageal carcinoma|Neoplasm of the large intestine|Adenoid cystic carcinoma|Neoplasm of brain|Squamous cell carcinoma of the head and neck|Breast neoplasm|Lung adenocarcinoma|Uterine carcinosarcoma|Hepatocellular carcinoma…	germline;somatic	germline/somatic	GRCh37	NC_000017.10	17	7578479	7578479	na	na	17p13.1	criteria provided, multiple submitters, no conflicts	8	ACMG2013,ACMG2016,ACMG2021,ACMG2022	N	ClinGen:CA000198,UniProtKB:P04637#VAR_005896,OMIM:191170.0025	3	12369	7578479	G	T	TP53:NM_001126115:exon1:c.C55A:p.P19T,TP53:NM_001126116:exon1:c.C55A:p.P19T,TP53:NM_001126117:exon1:c.C55A:p.P19T,TP53:NM_001126118:exon4:c.C334A:p.P112T,TP53:NM_000546:exon5:c.C451A:p.P151T,TP53:NM_001126112:exon5:c.C451A:p.P151T,TP53:NM_001126113:exon5:c.C451A:p.P151T,TP53:NM_001126114:exon5:c.C451A:p.P151T,TP53:NM_001276695:exon5:c.C334A:p.P112T,TP53:NM_001276696:exon5:c.C334A:p.P112T,TP53:NM_…	0.001	pathogenic	0.001	pathogenic	1.0	pathogenic	1.0	pathogenic	3.195	pathogenic	1.0	pathogenic	-7.49	pathogenic
TP53	27409	single nucleotide variant	NM_000546.6(TP53):c.451C>T (p.Pro151Ser)	7157	TP53	HGNC:11998	Pathogenic/Likely pathogenic	1	Jun 18, 2022	28934874	-	RCV000013169|RCV000079203|RCV000219702|RCV000420199|RCV000429847|RCV000421928|RCV000420869|RCV000422996|RCV000424996|RCV000435681|RCV000440887|RCV000432585|RCV000426058|RCV000433689|RCV000427411|RCV000440140|RCV000431507|RCV000443379|RCV000438074|RCV000443020|RCV000633355|RCV000785532|RCV001257523|RCV002288487	MONDO:MONDO:0004988,MedGen:C0858252|MedGen:C3661900|MONDO:MONDO:0015356,MeSH:D009386,MedGen:C0027672,Orphanet:140162|Human Phenotype Ontology:HP:0012056,MONDO:MONDO:0005012,MeSH:C562393,MedGen:C0151779|Human Phenotype Ontology:HP:0100834,MONDO:MONDO:0005335,MeSH:D015179,MedGen:C0009404|Human Phenotype Ontology:HP:0011459,MONDO:MONDO:0019086,MedGen:C0152018,Orphanet:70482|Human Phenotype Ontology:…	Breast adenocarcinoma|not provided|Hereditary cancer-predisposing syndrome|Malignant melanoma of skin|Neoplasm of the large intestine|Esophageal carcinoma|Gastric adenocarcinoma|Malignant neoplasm of body of uterus|Ovarian serous cystadenocarcinoma|Neoplasm of brain|Pancreatic adenocarcinoma|Adenoid cystic carcinoma|Multiple myeloma|Squamous cell carcinoma of the head and neck|Lung adenocarcinoma…	germline;somatic;unknown	germline/somatic	GRCh37	NC_000017.10	17	7578479	7578479	na	na	17p13.1	criteria provided, multiple submitters, no conflicts	9	ACMG2013,ACMG2016,ACMG2021,ACMG2022	N	ClinGen:CA000200,UniProtKB:P04637#VAR_005895,OMIM:191170.0026	3	12370	7578479	G	A	TP53:NM_001126115:exon1:c.C55T:p.P19S,TP53:NM_001126116:exon1:c.C55T:p.P19S,TP53:NM_001126117:exon1:c.C55T:p.P19S,TP53:NM_001126118:exon4:c.C334T:p.P112S,TP53:NM_000546:exon5:c.C451T:p.P151S,TP53:NM_001126112:exon5:c.C451T:p.P151S,TP53:NM_001126113:exon5:c.C451T:p.P151S,TP53:NM_001126114:exon5:c.C451T:p.P151S,TP53:NM_001276695:exon5:c.C334T:p.P112S,TP53:NM_001276696:exon5:c.C334T:p.P112S,TP53:NM_…	0.002	pathogenic	0.002	pathogenic	1.0	pathogenic	1.0	pathogenic	2.295	pathogenic	1.0	pathogenic	-7.47	pathogenic
TP53	27413	single nucleotide variant	NM_000546.6(TP53):c.524G>A (p.Arg175His)	7157	TP53	HGNC:11998	Pathogenic	1	May 11, 2023	28934578	-	RCV000013173|RCV000131301|RCV000213054|RCV000204931|RCV000239398|RCV000421746|RCV000428918|RCV000785352|RCV001270269|RCV001255668|RCV001270268|RCV001527463|RCV002476956|RCV003162247	Gene:553989,MedGen:C1835398,OMIM:151623,Orphanet:524|MONDO:MONDO:0015356,MeSH:D009386,MedGen:C0027672,Orphanet:140162|MedGen:C3661900|MONDO:MONDO:0018875,MedGen:C0085390,OMIM:PS151623,Orphanet:524|MONDO:MONDO:0007576,MedGen:C0546837,OMIM:133239,Orphanet:99977|Human Phenotype Ontology:HP:0002664,Human Phenotype Ontology:HP:0003008,Human Phenotype Ontology:HP:0006741,MONDO:MONDO:0005070,MeSH:D00936…	Li-Fraumeni syndrome 1|Hereditary cancer-predisposing syndrome|not provided|Li-Fraumeni syndrome|Malignant tumor of esophagus|Neoplasm|Breast neoplasm|Neoplasm of ovary|Colorectal cancer|Lip and oral cavity carcinoma|Squamous cell carcinoma of the head and neck|Familial cancer of breast|12 conditions|Stomach cancer	germline;somatic;unknown	germline/somatic	GRCh37	NC_000017.10	17	7578406	7578406	na	na	17p13.1	criteria provided, multiple submitters, no conflicts	26	ACMG2013,ACMG2016,ACMG2021,ACMG2022	N	ClinGen:CA000251,UniProtKB:P04637#VAR_005932,OMIM:191170.0030	3	12374	7578406	C	T	TP53:NM_001126115:exon1:c.G128A:p.R43H,TP53:NM_001126116:exon1:c.G128A:p.R43H,TP53:NM_001126117:exon1:c.G128A:p.R43H,TP53:NM_001276697:exon1:c.G47A:p.R16H,TP53:NM_001276698:exon1:c.G47A:p.R16H,TP53:NM_001276699:exon1:c.G47A:p.R16H,TP53:NM_001126118:exon4:c.G407A:p.R136H,TP53:NM_000546:exon5:c.G524A:p.R175H,TP53:NM_001126112:exon5:c.G524A:p.R175H,TP53:NM_001126113:exon5:c.G524A:p.R175H,TP53:NM_001…	0.0	pathogenic	0.0	pathogenic	1.0	pathogenic	0.999	pathogenic	2.585	pathogenic	1.0	pathogenic	-7.55	pathogenic
TP53	27414	single nucleotide variant	NM_000546.6(TP53):c.1031T>C (p.Leu344Pro)	7157	TP53	HGNC:11998	Likely pathogenic	1	Aug 28, 2019	121912662	-	RCV000013174|RCV000991141|RCV002390102	Gene:553989,MedGen:C1835398,OMIM:151623,Orphanet:524|MONDO:MONDO:0018875,MedGen:C0085390,OMIM:PS151623,Orphanet:524|MONDO:MONDO:0015356,MeSH:D009386,MedGen:C0027672,Orphanet:140162	Li-Fraumeni syndrome 1|Li-Fraumeni syndrome|Hereditary cancer-predisposing syndrome	germline	germline	GRCh37	NC_000017.10	17	7573996	7573996	na	na	17p13.1	reviewed by expert panel	3	ACMG2013,ACMG2016,ACMG2021,ACMG2022	N	ClinGen:CA000021,UniProtKB:P04637#VAR_045546,OMIM:191170.0031	3	12375	7573996	A	G	TP53:NM_001126115:exon6:c.T635C:p.L212P,TP53:NM_001276697:exon6:c.T554C:p.L185P,TP53:NM_001126118:exon9:c.T914C:p.L305P,TP53:NM_000546:exon10:c.T1031C:p.L344P,TP53:NM_001126112:exon10:c.T1031C:p.L344P,TP53:NM_001276760:exon10:c.T914C:p.L305P,TP53:NM_001276761:exon10:c.T914C:p.L305P	0.001	pathogenic	0.001	pathogenic	0.995	pathogenic	0.967	pathogenic	2.89	pathogenic	0.96	pathogenic	-3.64	pathogenic
TP53	27415	single nucleotide variant	NM_000546.6(TP53):c.412G>C (p.Ala138Pro)	7157	TP53	HGNC:11998	Pathogenic/Likely pathogenic	1	Aug 24, 2021	28934875	-	RCV000013175|RCV000461233|RCV002326677	Gene:553989,MedGen:C1835398,OMIM:151623,Orphanet:524|MONDO:MONDO:0018875,MedGen:C0085390,OMIM:PS151623,Orphanet:524|MONDO:MONDO:0015356,MeSH:D009386,MedGen:C0027672,Orphanet:140162	Li-Fraumeni syndrome 1|Li-Fraumeni syndrome|Hereditary cancer-predisposing syndrome	germline	germline	GRCh37	NC_000017.10	17	7578518	7578518	na	na	17p13.1	criteria provided, multiple submitters, no conflicts	3	ACMG2013,ACMG2016,ACMG2021,ACMG2022	N	ClinGen:CA000166,UniProtKB:P04637#VAR_005881,OMIM:191170.0032	3	12376	7578518	C	G	TP53:NM_001126115:exon1:c.G16C:p.A6P,TP53:NM_001126116:exon1:c.G16C:p.A6P,TP53:NM_001126117:exon1:c.G16C:p.A6P,TP53:NM_001126118:exon4:c.G295C:p.A99P,TP53:NM_000546:exon5:c.G412C:p.A138P,TP53:NM_001126112:exon5:c.G412C:p.A138P,TP53:NM_001126113:exon5:c.G412C:p.A138P,TP53:NM_001126114:exon5:c.G412C:p.A138P,TP53:NM_001276695:exon5:c.G295C:p.A99P,TP53:NM_001276696:exon5:c.G295C:p.A99P,TP53:NM_001276…	0.001	pathogenic	0.002	pathogenic	1.0	pathogenic	1.0	pathogenic	3.09	pathogenic	1.0	pathogenic	-7.28	pathogenic
TP53	27418	single nucleotide variant	NM_000546.6(TP53):c.1010G>A (p.Arg337His)	7157	TP53	HGNC:11998	Pathogenic/Likely pathogenic	1	Nov 01, 2022	121912664	-	RCV000013178|RCV000128923|RCV000197240|RCV000413754|RCV000481814|RCV000576817|RCV000989700|RCV001375632|RCV002251901|RCV002307364|RCV002496338|RCV003162248	MedGen:C1859973|MONDO:MONDO:0015356,MeSH:D009386,MedGen:C0027672,Orphanet:140162|MONDO:MONDO:0018875,MedGen:C0085390,OMIM:PS151623,Orphanet:524|Human Phenotype Ontology:HP:0010623,Human Phenotype Ontology:HP:0100013,MONDO:MONDO:0021100,MeSH:D001943,MedGen:C1458155|MedGen:C3661900|Gene:553989,MedGen:C1835398,OMIM:151623,Orphanet:524|MONDO:MONDO:0010150,MeSH:D000077195,MedGen:C1168401,OMIM:275355,O…	Adrenocortical carcinoma, pediatric|Hereditary cancer-predisposing syndrome|Li-Fraumeni syndrome|Breast neoplasm|not provided|Li-Fraumeni syndrome 1|Squamous cell carcinoma of the head and neck|Adrenocortical carcinoma, hereditary|See cases|Hereditary breast ovarian cancer syndrome|12 conditions|Stomach cancer	germline;maternal;unknown	germline	GRCh37	NC_000017.10	17	7574017	7574017	na	na	17p13.1	criteria provided, multiple submitters, no conflicts	18	ACMG2013,ACMG2016,ACMG2021,ACMG2022	N	ClinGen:CA000013,UniProtKB:P04637#VAR_035016,OMIM:191170.0035	3	12379	7574017	C	T	TP53:NM_001126115:exon6:c.G614A:p.R205H,TP53:NM_001276697:exon6:c.G533A:p.R178H,TP53:NM_001126118:exon9:c.G893A:p.R298H,TP53:NM_000546:exon10:c.G1010A:p.R337H,TP53:NM_001126112:exon10:c.G1010A:p.R337H,TP53:NM_001276760:exon10:c.G893A:p.R298H,TP53:NM_001276761:exon10:c.G893A:p.R298H	0.038	pathogenic	0.054	benign	0.96	pathogenic	0.719	pathogenic	2.4	pathogenic	0.98	pathogenic	-3.63	pathogenic
TP53	27422	single nucleotide variant	NM_000546.6(TP53):c.659A>C (p.Tyr220Ser)	7157	TP53	HGNC:11998	Pathogenic	1	Nov 11, 2022	121912666	-	RCV000013183|RCV000423167|RCV000418406|RCV000424238|RCV000417473|RCV000429097|RCV000422874|RCV000425801|RCV000432708|RCV000428157|RCV000425300|RCV000435597|RCV000430581|RCV000436486|RCV000433786|RCV000441285|RCV000444276|RCV000445060|RCV000441465|RCV000472593|RCV000443214|RCV000785481|RCV003162249	Gene:553989,MedGen:C1835398,OMIM:151623,Orphanet:524|Human Phenotype Ontology:HP:0001402,Human Phenotype Ontology:HP:0002899,Human Phenotype Ontology:HP:0003007,Human Phenotype Ontology:HP:0006750,MONDO:MONDO:0007256,MedGen:C2239176,OMIM:114550,Orphanet:88673|Human Phenotype Ontology:HP:0030359,MONDO:MONDO:0005097,MedGen:C0149782|Human Phenotype Ontology:HP:0006725,MONDO:MONDO:0006047,MedGen:C028…	Li-Fraumeni syndrome 1|Hepatocellular carcinoma|Squamous cell lung carcinoma|Pancreatic adenocarcinoma|Papillary renal cell carcinoma type 1|Breast neoplasm|Lung adenocarcinoma|Squamous cell carcinoma of the head and neck|Malignant melanoma of skin|Prostate adenocarcinoma|Ovarian serous cystadenocarcinoma|Malignant neoplasm of body of uterus|Small cell lung carcinoma|Transitional cell carcinoma o…	germline;somatic	germline/somatic	GRCh37	NC_000017.10	17	7578190	7578190	na	na	17p13.1	criteria provided, multiple submitters, no conflicts	5	ACMG2013,ACMG2016,ACMG2021,ACMG2022	N	ClinGen:CA000314,UniProtKB:P04637#VAR_005959,OMIM:191170.0039	3	12383	7578190	T	G	TP53:NM_001126115:exon2:c.A263C:p.Y88S,TP53:NM_001126116:exon2:c.A263C:p.Y88S,TP53:NM_001126117:exon2:c.A263C:p.Y88S,TP53:NM_001276697:exon2:c.A182C:p.Y61S,TP53:NM_001276698:exon2:c.A182C:p.Y61S,TP53:NM_001276699:exon2:c.A182C:p.Y61S,TP53:NM_001126118:exon5:c.A542C:p.Y181S,TP53:NM_000546:exon6:c.A659C:p.Y220S,TP53:NM_001126112:exon6:c.A659C:p.Y220S,TP53:NM_001126113:exon6:c.A659C:p.Y220S,TP53:NM_…	0.0	pathogenic	0.0	pathogenic	1.0	pathogenic	1.0	pathogenic	3.165	pathogenic	1.0	pathogenic	-7.03	pathogenic
TP53	27423	single nucleotide variant	NM_000546.6(TP53):c.854A>T (p.Glu285Val)	7157	TP53	HGNC:11998	Pathogenic	1	Aug 13, 2021	121912667	-	RCV000013185|RCV000013184|RCV000813961	Human Phenotype Ontology:HP:0030392,MONDO:MONDO:0016718,MedGen:C0431109,Orphanet:251899|MedGen:C1859973|MONDO:MONDO:0018875,MedGen:C0085390,OMIM:PS151623,Orphanet:524	Choroid plexus carcinoma|Adrenocortical carcinoma, pediatric|Li-Fraumeni syndrome	germline	germline	GRCh37	NC_000017.10	17	7577084	7577084	na	na	17p13.1	criteria provided, single submitter	2	ACMG2013,ACMG2016,ACMG2021,ACMG2022	N	UniProtKB:P04637#VAR_006025,OMIM:191170.0040,ClinGen:CA000463	3	12384	7577084	T	A	TP53:NM_001126115:exon4:c.A458T:p.E153V,TP53:NM_001126116:exon4:c.A458T:p.E153V,TP53:NM_001126117:exon4:c.A458T:p.E153V,TP53:NM_001276697:exon4:c.A377T:p.E126V,TP53:NM_001276698:exon4:c.A377T:p.E126V,TP53:NM_001276699:exon4:c.A377T:p.E126V,TP53:NM_001126118:exon7:c.A737T:p.E246V,TP53:NM_000546:exon8:c.A854T:p.E285V,TP53:NM_001126112:exon8:c.A854T:p.E285V,TP53:NM_001126113:exon8:c.A854T:p.E285V,TP…	0.0	pathogenic	0.001	pathogenic	0.999	pathogenic	0.994	pathogenic	2.7	pathogenic	1.0	pathogenic	-6.97	pathogenic
TGFB1	27568	single nucleotide variant	NM_000660.7(TGFB1):c.653G>A (p.Arg218His)	7040	TGFB1	HGNC:11766	Pathogenic	1	Sep 11, 2023	104894720	-	RCV000013355|RCV001851823	Human Phenotype Ontology:HP:0100252,MONDO:MONDO:0007542,MedGen:C0011989,OMIM:131300,Orphanet:1328|MedGen:C3661900	Diaphyseal dysplasia|not provided	germline	germline	GRCh37	NC_000019.9	19	41848134	41848134	na	na	19q13.2	criteria provided, multiple submitters, no conflicts	5	-	N	ClinGen:CA341196,OMIM:190180.0002	3	12529	41848134	C	T	TGFB1:NM_000660:exon4:c.G653A:p.R218H	0.007	pathogenic	0.029	pathogenic	1.0	pathogenic	0.986	pathogenic	2.655	pathogenic	0.86	pathogenic	-0.14	benign
TGFB1	27570	single nucleotide variant	NM_000660.7(TGFB1):c.652C>T (p.Arg218Cys)	7040	TGFB1	HGNC:11766	Pathogenic	1	Apr 01, 2023	104894721	-	RCV000013357|RCV001794443|RCV003156058	Human Phenotype Ontology:HP:0100252,MONDO:MONDO:0007542,MedGen:C0011989,OMIM:131300,Orphanet:1328|MedGen:C3661900|	Diaphyseal dysplasia|not provided|See cases	de novo;germline;unknown	germline	GRCh37	NC_000019.9	19	41848135	41848135	na	na	19q13.2	criteria provided, multiple submitters, no conflicts	8	-	N	ClinGen:CA341200,OMIM:190180.0003	3	12531	41848135	G	A	TGFB1:NM_000660:exon4:c.C652T:p.R218C	0.001	pathogenic	0.003	pathogenic	1.0	pathogenic	0.997	pathogenic	2.655	pathogenic	0.71	pathogenic	-0.18	benign
TGFB1	27573	single nucleotide variant	NM_000660.7(TGFB1):c.29C>T (p.Pro10Leu)	7040	TGFB1	HGNC:11766	Benign	0	Nov 04, 2022	1800470	-	RCV000013360|RCV000013361|RCV000242872|RCV001516678|RCV001838525|RCV001838526|RCV002496341	MONDO:MONDO:0009061,MedGen:C0010674,OMIM:219700,Orphanet:586||MedGen:CN169374|MedGen:C3661900|Human Phenotype Ontology:HP:0100252,MONDO:MONDO:0007542,MedGen:C0011989,OMIM:131300,Orphanet:1328|MONDO:MONDO:0032601,MedGen:C4748708,OMIM:618213,Orphanet:565788|MONDO:MONDO:0013609,MedGen:C3280036,OMIM:614175,Orphanet:564	Cystic fibrosis|Breast cancer, invasive, susceptibility to|not specified|not provided|Diaphyseal dysplasia|Inflammatory bowel disease, immunodeficiency, and encephalopathy|Meckel syndrome, type 10	germline;unknown	germline	GRCh37	NC_000019.9	19	41858921	41858921	na	na	19q13.2	criteria provided, multiple submitters, no conflicts	7	-	N	ClinGen:CA122449,OMIM:190180.0007	3	12534	41858921	G	A	TGFB1:NM_000660:exon1:c.C29T:p.P10L	0.83	benign	0.178	benign	-	-	-	-	-	-	0.06	benign	1.73	benign
THRB	27581	single nucleotide variant	NM_001354712.2(THRB):c.949G>A (p.Ala317Thr)	7068	THRB	HGNC:11799	Pathogenic	1	May 05, 2023	121918690	-	RCV000013369|RCV000760096	MONDO:MONDO:0008569,MedGen:C2937288,OMIM:188570|MedGen:CN517202	Thyroid hormone resistance, generalized, autosomal dominant|not provided	germline	germline	GRCh37	NC_000003.11	3	24169185	24169185	na	na	3p24.2	criteria provided, multiple submitters, no conflicts	5	-	N	OMIM:190160.0006,ClinGen:CA122467,UniProtKB:P10828#VAR_004635	3	12542	24169185	C	T	THRB:NM_001354714:exon8:c.G856A:p.A286T,THRB:NM_001354715:exon8:c.G856A:p.A286T,THRB:NM_000461:exon9:c.G949A:p.A317T,THRB:NM_001354708:exon9:c.G949A:p.A317T,THRB:NM_001354711:exon9:c.G949A:p.A317T,THRB:NM_001354713:exon9:c.G949A:p.A317T,THRB:NM_001128176:exon10:c.G949A:p.A317T,THRB:NM_001128177:exon10:c.G949A:p.A317T,THRB:NM_001354709:exon10:c.G949A:p.A317T,THRB:NM_001354710:exon10:c.G949A:p.A317…	0.077	benign	0.529	benign	1.0	pathogenic	0.99	pathogenic	1.17	pathogenic	0.97	pathogenic	-3.64	pathogenic
THRB	27584	single nucleotide variant	NM_001354712.2(THRB):c.1034G>T (p.Gly345Val)	7068	THRB	HGNC:11799	Pathogenic	1	May 14, 2019	28999970	-	RCV000013372|RCV000986042	MONDO:MONDO:0008569,MedGen:C2937288,OMIM:188570|MedGen:CN517202	Thyroid hormone resistance, generalized, autosomal dominant|not provided	germline	germline	GRCh37	NC_000003.11	3	24169100	24169100	na	na	3p24.2	criteria provided, single submitter	2	-	N	ClinGen:CA122473,UniProtKB:P10828#VAR_004643,OMIM:190160.0008	3	12545	24169100	C	A	THRB:NM_001354714:exon8:c.G941T:p.G314V,THRB:NM_001354715:exon8:c.G941T:p.G314V,THRB:NM_000461:exon9:c.G1034T:p.G345V,THRB:NM_001354708:exon9:c.G1034T:p.G345V,THRB:NM_001354711:exon9:c.G1034T:p.G345V,THRB:NM_001354713:exon9:c.G1034T:p.G345V,THRB:NM_001128176:exon10:c.G1034T:p.G345V,THRB:NM_001128177:exon10:c.G1034T:p.G345V,THRB:NM_001354709:exon10:c.G1034T:p.G345V,THRB:NM_001354710:exon10:c.G1034…	0.026	pathogenic	0.02	pathogenic	1.0	pathogenic	1.0	pathogenic	2.46	pathogenic	1.0	pathogenic	-4.07	pathogenic
THRB	27586	single nucleotide variant	NM_001354712.2(THRB):c.1324A>G (p.Met442Val)	7068	THRB	HGNC:11799	Likely pathogenic	1	Aug 26, 2023	121918691	-	RCV000013374|RCV000760087|RCV003390675	MONDO:MONDO:0008569,MedGen:C2937288,OMIM:188570|MedGen:C3661900|	Thyroid hormone resistance, generalized, autosomal dominant|not provided|THRB-related condition	germline;unknown	germline	GRCh37	NC_000003.11	3	24164437	24164437	na	na	3p24.2	criteria provided, multiple submitters, no conflicts	5	-	N	ClinGen:CA122477,UniProtKB:P10828#VAR_004650,OMIM:190160.0010	3	12547	24164437	T	C	THRB:NM_001354714:exon9:c.A1231G:p.M411V,THRB:NM_001354715:exon9:c.A1231G:p.M411V,THRB:NM_000461:exon10:c.A1324G:p.M442V,THRB:NM_001354708:exon10:c.A1324G:p.M442V,THRB:NM_001354711:exon10:c.A1324G:p.M442V,THRB:NM_001354713:exon10:c.A1324G:p.M442V,THRB:NM_001128176:exon11:c.A1324G:p.M442V,THRB:NM_001128177:exon11:c.A1324G:p.M442V,THRB:NM_001354709:exon11:c.A1324G:p.M442V,THRB:NM_001354710:exon11:c…	0.154	benign	0.089	benign	0.542	pathogenic	0.237	benign	1.245	pathogenic	1.0	pathogenic	-3.54	pathogenic
THRB	27589	single nucleotide variant	NM_001354712.2(THRB):c.1357C>A (p.Pro453Thr)	7068	THRB	HGNC:11799	Pathogenic	1	Apr 19, 2023	28933408	-	RCV000013377|RCV000725589	MONDO:MONDO:0008569,MedGen:C2937288,OMIM:188570|MedGen:CN517202	Thyroid hormone resistance, generalized, autosomal dominant|not provided	germline;unknown	germline	GRCh37	NC_000003.11	3	24164404	24164404	na	na	3p24.2	criteria provided, multiple submitters, no conflicts	6	-	N	ClinGen:CA122481,UniProtKB:P10828#VAR_004655,OMIM:190160.0012	3	12550	24164404	G	T	THRB:NM_001354714:exon9:c.C1264A:p.P422T,THRB:NM_001354715:exon9:c.C1264A:p.P422T,THRB:NM_000461:exon10:c.C1357A:p.P453T,THRB:NM_001354708:exon10:c.C1357A:p.P453T,THRB:NM_001354711:exon10:c.C1357A:p.P453T,THRB:NM_001354713:exon10:c.C1357A:p.P453T,THRB:NM_001128176:exon11:c.C1357A:p.P453T,THRB:NM_001128177:exon11:c.C1357A:p.P453T,THRB:NM_001354709:exon11:c.C1357A:p.P453T,THRB:NM_001354710:exon11:c…	0.001	pathogenic	0.002	pathogenic	0.999	pathogenic	0.993	pathogenic	2.495	pathogenic	0.99	pathogenic	-3.99	pathogenic
THRB	27591	single nucleotide variant	NM_001354712.2(THRB):c.1033G>A (p.Gly345Ser)	7068	THRB	HGNC:11799	Pathogenic	1	Apr 15, 2023	121918686	-	RCV000013379|RCV002476957	MONDO:MONDO:0008569,MedGen:C2937288,OMIM:188570|MedGen:CN517202	Thyroid hormone resistance, generalized, autosomal dominant|not provided	germline;unknown	germline	GRCh37	NC_000003.11	3	24169101	24169101	na	na	3p24.2	criteria provided, multiple submitters, no conflicts	3	-	N	ClinGen:CA122485,UniProtKB:P10828#VAR_004644,OMIM:190160.0014	3	12552	24169101	C	T	THRB:NM_001354714:exon8:c.G940A:p.G314S,THRB:NM_001354715:exon8:c.G940A:p.G314S,THRB:NM_000461:exon9:c.G1033A:p.G345S,THRB:NM_001354708:exon9:c.G1033A:p.G345S,THRB:NM_001354711:exon9:c.G1033A:p.G345S,THRB:NM_001354713:exon9:c.G1033A:p.G345S,THRB:NM_001128176:exon10:c.G1033A:p.G345S,THRB:NM_001128177:exon10:c.G1033A:p.G345S,THRB:NM_001354709:exon10:c.G1033A:p.G345S,THRB:NM_001354710:exon10:c.G1033…	0.003	pathogenic	0.01	pathogenic	1.0	pathogenic	0.998	pathogenic	2.115	pathogenic	1.0	pathogenic	-4.07	pathogenic
THRB	27592	single nucleotide variant	NM_001354712.2(THRB):c.959G>A (p.Arg320His)	7068	THRB	HGNC:11799	Pathogenic/Likely pathogenic	1	Jul 19, 2023	121918693	-	RCV000013380|RCV000622278|RCV000760097	MONDO:MONDO:0008569,MedGen:C2937288,OMIM:188570|MeSH:D030342,MedGen:C0950123|MedGen:CN517202	Thyroid hormone resistance, generalized, autosomal dominant|Inborn genetic diseases|not provided	germline	germline	GRCh37	NC_000003.11	3	24169175	24169175	na	na	3p24.2	criteria provided, multiple submitters, no conflicts	5	-	N	ClinGen:CA122487,UniProtKB:P10828#VAR_004637,OMIM:190160.0015	3	12553	24169175	C	T	THRB:NM_001354714:exon8:c.G866A:p.R289H,THRB:NM_001354715:exon8:c.G866A:p.R289H,THRB:NM_000461:exon9:c.G959A:p.R320H,THRB:NM_001354708:exon9:c.G959A:p.R320H,THRB:NM_001354711:exon9:c.G959A:p.R320H,THRB:NM_001354713:exon9:c.G959A:p.R320H,THRB:NM_001128176:exon10:c.G959A:p.R320H,THRB:NM_001128177:exon10:c.G959A:p.R320H,THRB:NM_001354709:exon10:c.G959A:p.R320H,THRB:NM_001354710:exon10:c.G959A:p.R320…	0.0	pathogenic	0.012	pathogenic	1.0	pathogenic	1.0	pathogenic	2.605	pathogenic	1.0	pathogenic	-4.3	pathogenic
THRB	27593	single nucleotide variant	NM_001354712.2(THRB):c.700G>A (p.Ala234Thr)	7068	THRB	HGNC:11799	Pathogenic	1	Jun 22, 2020	121918694	-	RCV000013381|RCV000502150|RCV001284717	MONDO:MONDO:0008569,MedGen:C2937288,OMIM:188570|MONDO:MONDO:0001328,MedGen:C2940786|MedGen:CN517202	Thyroid hormone resistance, generalized, autosomal dominant|Thyroid hormone resistance syndrome|not provided	germline;unknown	germline	GRCh37	NC_000003.11	3	24185030	24185030	na	na	3p24.2	criteria provided, multiple submitters, no conflicts	3	-	N	ClinGen:CA122489,UniProtKB:P10828#VAR_004632,OMIM:190160.0017	3	12554	24185030	C	T	THRB:NM_001354714:exon6:c.G607A:p.A203T,THRB:NM_001354715:exon6:c.G607A:p.A203T,THRB:NM_000461:exon7:c.G700A:p.A234T,THRB:NM_001354708:exon7:c.G700A:p.A234T,THRB:NM_001354711:exon7:c.G700A:p.A234T,THRB:NM_001354713:exon7:c.G700A:p.A234T,THRB:NM_001128176:exon8:c.G700A:p.A234T,THRB:NM_001128177:exon8:c.G700A:p.A234T,THRB:NM_001354709:exon8:c.G700A:p.A234T,THRB:NM_001354710:exon8:c.G700A:p.A234T,TH…	0.01	pathogenic	0.333	benign	0.998	pathogenic	0.741	pathogenic	2.38	pathogenic	1.0	pathogenic	-3.57	pathogenic
THRB	27594	single nucleotide variant	NM_001354712.2(THRB):c.947G>A (p.Arg316His)	7068	THRB	HGNC:11799	Pathogenic	1	Feb 08, 2022	121918695	-	RCV000013382|RCV001844011|RCV002476958	MONDO:MONDO:0007784,MedGen:C1840364,OMIM:145650,Orphanet:165994|MONDO:MONDO:0008569,MedGen:C2937288,OMIM:188570|MedGen:CN517202	Selective pituitary resistance to thyroid hormone|Thyroid hormone resistance, generalized, autosomal dominant|not provided	germline;unknown	germline	GRCh37	NC_000003.11	3	24169187	24169187	na	na	3p24.2	criteria provided, multiple submitters, no conflicts	3	-	N	ClinGen:CA122491,UniProtKB:P10828#VAR_004634,OMIM:190160.0018	3	12555	24169187	C	T	THRB:NM_001354714:exon8:c.G854A:p.R285H,THRB:NM_001354715:exon8:c.G854A:p.R285H,THRB:NM_000461:exon9:c.G947A:p.R316H,THRB:NM_001354708:exon9:c.G947A:p.R316H,THRB:NM_001354711:exon9:c.G947A:p.R316H,THRB:NM_001354713:exon9:c.G947A:p.R316H,THRB:NM_001128176:exon10:c.G947A:p.R316H,THRB:NM_001128177:exon10:c.G947A:p.R316H,THRB:NM_001354709:exon10:c.G947A:p.R316H,THRB:NM_001354710:exon10:c.G947A:p.R316…	0.002	pathogenic	0.002	pathogenic	1.0	pathogenic	1.0	pathogenic	2.085	pathogenic	0.97	pathogenic	-4.0	pathogenic
THRB	27596	single nucleotide variant	NM_001354712.2(THRB):c.958C>T (p.Arg320Cys)	7068	THRB	HGNC:11799	Pathogenic	1	Oct 03, 2022	121918696	-	RCV000013384|RCV001284719|RCV002504780	MONDO:MONDO:0008569,MedGen:C2937288,OMIM:188570|MedGen:CN517202|MONDO:MONDO:0010131,MedGen:C3489796,OMIM:274300;MONDO:MONDO:0008569,MedGen:C2937288,OMIM:188570;MONDO:MONDO:0007784,MedGen:C1840364,OMIM:145650,Orphanet:165994	Thyroid hormone resistance, generalized, autosomal dominant|not provided|Thyroid hormone resistance, generalized, autosomal recessive;Thyroid hormone resistance, generalized, autosomal dominant;Selective pituitary resistance to thyroid hormone	germline;unknown	germline	GRCh37	NC_000003.11	3	24169176	24169176	na	na	3p24.2	criteria provided, multiple submitters, no conflicts	5	-	N	ClinGen:CA122493,UniProtKB:P10828#VAR_004636,OMIM:190160.0021	3	12557	24169176	G	A	THRB:NM_001354714:exon8:c.C865T:p.R289C,THRB:NM_001354715:exon8:c.C865T:p.R289C,THRB:NM_000461:exon9:c.C958T:p.R320C,THRB:NM_001354708:exon9:c.C958T:p.R320C,THRB:NM_001354711:exon9:c.C958T:p.R320C,THRB:NM_001354713:exon9:c.C958T:p.R320C,THRB:NM_001128176:exon10:c.C958T:p.R320C,THRB:NM_001128177:exon10:c.C958T:p.R320C,THRB:NM_001354709:exon10:c.C958T:p.R320C,THRB:NM_001354710:exon10:c.C958T:p.R320…	0.0	pathogenic	0.003	pathogenic	1.0	pathogenic	1.0	pathogenic	1.975	pathogenic	0.99	pathogenic	-4.31	pathogenic
THRB	27597	single nucleotide variant	NM_001354712.2(THRB):c.1012C>T (p.Arg338Trp)	7068	THRB	HGNC:11799	Pathogenic	1	May 25, 2022	121918697	-	RCV000013385|RCV000013386|RCV000986041	MONDO:MONDO:0008569,MedGen:C2937288,OMIM:188570|MONDO:MONDO:0007784,MedGen:C1840364,OMIM:145650,Orphanet:165994|MedGen:CN517202	Thyroid hormone resistance, generalized, autosomal dominant|Selective pituitary resistance to thyroid hormone|not provided	de novo;germline;unknown	germline	GRCh37	NC_000003.11	3	24169122	24169122	na	na	3p24.2	criteria provided, multiple submitters, no conflicts	5	-	N	ClinGen:CA122495,UniProtKB:P10828#VAR_004640,OMIM:190160.0023	3	12558	24169122	G	A	THRB:NM_001354714:exon8:c.C919T:p.R307W,THRB:NM_001354715:exon8:c.C919T:p.R307W,THRB:NM_000461:exon9:c.C1012T:p.R338W,THRB:NM_001354708:exon9:c.C1012T:p.R338W,THRB:NM_001354711:exon9:c.C1012T:p.R338W,THRB:NM_001354713:exon9:c.C1012T:p.R338W,THRB:NM_001128176:exon10:c.C1012T:p.R338W,THRB:NM_001128177:exon10:c.C1012T:p.R338W,THRB:NM_001354709:exon10:c.C1012T:p.R338W,THRB:NM_001354710:exon10:c.C1012…	0.0	pathogenic	0.003	pathogenic	1.0	pathogenic	0.992	pathogenic	3.13	pathogenic	1.0	pathogenic	-4.22	pathogenic
THRB	27598	single nucleotide variant	NM_001354712.2(THRB):c.1313G>A (p.Arg438His)	7068	THRB	HGNC:11799	Pathogenic	1	Aug 29, 2022	121918698	-	RCV000013387|RCV001800292|RCV003148621	MONDO:MONDO:0008569,MedGen:C2937288,OMIM:188570|MedGen:CN169374|MedGen:CN517202	Thyroid hormone resistance, generalized, autosomal dominant|not specified|not provided	germline;unknown	germline	GRCh37	NC_000003.11	3	24164448	24164448	na	na	3p24.2	criteria provided, multiple submitters, no conflicts	4	-	N	ClinGen:CA122497,UniProtKB:P10828#VAR_004649,OMIM:190160.0024	3	12559	24164448	C	T	THRB:NM_001354714:exon9:c.G1220A:p.R407H,THRB:NM_001354715:exon9:c.G1220A:p.R407H,THRB:NM_000461:exon10:c.G1313A:p.R438H,THRB:NM_001354708:exon10:c.G1313A:p.R438H,THRB:NM_001354711:exon10:c.G1313A:p.R438H,THRB:NM_001354713:exon10:c.G1313A:p.R438H,THRB:NM_001128176:exon11:c.G1313A:p.R438H,THRB:NM_001128177:exon11:c.G1313A:p.R438H,THRB:NM_001354709:exon11:c.G1313A:p.R438H,THRB:NM_001354710:exon11:c…	0.001	pathogenic	0.017	pathogenic	1.0	pathogenic	0.998	pathogenic	1.39	pathogenic	1.0	pathogenic	-3.59	pathogenic
THRB	27602	single nucleotide variant	NM_001354712.2(THRB):c.1336T>C (p.Cys446Arg)	7068	THRB	HGNC:11799	Pathogenic	1	Dec 12, 2022	121918703	-	RCV000013391|RCV003233068	MONDO:MONDO:0008569,MedGen:C2937288,OMIM:188570|MedGen:CN517202	Thyroid hormone resistance, generalized, autosomal dominant|not provided	germline	germline	GRCh37	NC_000003.11	3	24164425	24164425	na	na	3p24.2	criteria provided, single submitter	2	-	N	ClinGen:CA122503,UniProtKB:P10828#VAR_004652,OMIM:190160.0034	3	12563	24164425	A	G	THRB:NM_001354714:exon9:c.T1243C:p.C415R,THRB:NM_001354715:exon9:c.T1243C:p.C415R,THRB:NM_000461:exon10:c.T1336C:p.C446R,THRB:NM_001354708:exon10:c.T1336C:p.C446R,THRB:NM_001354711:exon10:c.T1336C:p.C446R,THRB:NM_001354713:exon10:c.T1336C:p.C446R,THRB:NM_001128176:exon11:c.T1336C:p.C446R,THRB:NM_001128177:exon11:c.T1336C:p.C446R,THRB:NM_001354709:exon11:c.T1336C:p.C446R,THRB:NM_001354710:exon11:c…	0.09	benign	0.323	benign	1.0	pathogenic	0.998	pathogenic	1.155	pathogenic	1.0	pathogenic	-3.54	pathogenic
THRB	27603	single nucleotide variant	NM_001354712.2(THRB):c.1373T>C (p.Val458Ala)	7068	THRB	HGNC:11799	Likely pathogenic	1	Oct 07, 2019	121918704	-	RCV000986043|RCV000852377	MedGen:CN517202|MONDO:MONDO:0008569,MedGen:C2937288,OMIM:188570	not provided|Thyroid hormone resistance, generalized, autosomal dominant	germline	germline	GRCh37	NC_000003.11	3	24164388	24164388	na	na	3p24.2	criteria provided, multiple submitters, no conflicts	3	-	N	ClinGen:CA122505,OMIM:190160.0035	3	12564	24164388	A	G	THRB:NM_001354714:exon9:c.T1280C:p.V427A,THRB:NM_001354715:exon9:c.T1280C:p.V427A,THRB:NM_000461:exon10:c.T1373C:p.V458A,THRB:NM_001354708:exon10:c.T1373C:p.V458A,THRB:NM_001354711:exon10:c.T1373C:p.V458A,THRB:NM_001354713:exon10:c.T1373C:p.V458A,THRB:NM_001128176:exon11:c.T1373C:p.V458A,THRB:NM_001128177:exon11:c.T1373C:p.V458A,THRB:NM_001354709:exon11:c.T1373C:p.V458A,THRB:NM_001354710:exon11:c…	0.007	pathogenic	0.007	pathogenic	0.922	pathogenic	0.641	pathogenic	1.1	pathogenic	1.0	pathogenic	-3.84	pathogenic
THRB	27605	single nucleotide variant	NM_001354712.2(THRB):c.728G>A (p.Arg243Gln)	7068	THRB	HGNC:11799	Pathogenic	1	May 01, 2022	121918706	-	RCV000013394|RCV000760093|RCV002476959	MONDO:MONDO:0008569,MedGen:C2937288,OMIM:188570|MedGen:CN517202|MONDO:MONDO:0010131,MedGen:C3489796,OMIM:274300;MONDO:MONDO:0008569,MedGen:C2937288,OMIM:188570;MONDO:MONDO:0007784,MedGen:C1840364,OMIM:145650,Orphanet:165994	Thyroid hormone resistance, generalized, autosomal dominant|not provided|Thyroid hormone resistance, generalized, autosomal recessive;Thyroid hormone resistance, generalized, autosomal dominant;Selective pituitary resistance to thyroid hormone	germline;unknown	germline	GRCh37	NC_000003.11	3	24185002	24185002	na	na	3p24.2	criteria provided, multiple submitters, no conflicts	5	-	N	ClinGen:CA122509,OMIM:190160.0037	3	12566	24185002	C	T	THRB:NM_001354714:exon6:c.G635A:p.R212Q,THRB:NM_001354715:exon6:c.G635A:p.R212Q,THRB:NM_000461:exon7:c.G728A:p.R243Q,THRB:NM_001354708:exon7:c.G728A:p.R243Q,THRB:NM_001354711:exon7:c.G728A:p.R243Q,THRB:NM_001354713:exon7:c.G728A:p.R243Q,THRB:NM_001128176:exon8:c.G728A:p.R243Q,THRB:NM_001128177:exon8:c.G728A:p.R243Q,THRB:NM_001354709:exon8:c.G728A:p.R243Q,THRB:NM_001354710:exon8:c.G728A:p.R243Q,TH…	0.054	benign	0.154	benign	1.0	pathogenic	0.983	pathogenic	2.36	pathogenic	0.97	pathogenic	-3.86	pathogenic
THRB	27606	single nucleotide variant	NM_001354712.2(THRB):c.727C>T (p.Arg243Trp)	7068	THRB	HGNC:11799	Pathogenic	1	Mar 04, 2021	121918707	-	RCV000013395|RCV000657921	MONDO:MONDO:0008569,MedGen:C2937288,OMIM:188570|MedGen:CN517202	Thyroid hormone resistance, generalized, autosomal dominant|not provided	germline;unknown	germline	GRCh37	NC_000003.11	3	24185003	24185003	na	na	3p24.2	criteria provided, multiple submitters, no conflicts	4	-	N	ClinGen:CA122511,UniProtKB:P10828#VAR_004633,OMIM:190160.0038	3	12567	24185003	G	A	THRB:NM_001354714:exon6:c.C634T:p.R212W,THRB:NM_001354715:exon6:c.C634T:p.R212W,THRB:NM_000461:exon7:c.C727T:p.R243W,THRB:NM_001354708:exon7:c.C727T:p.R243W,THRB:NM_001354711:exon7:c.C727T:p.R243W,THRB:NM_001354713:exon7:c.C727T:p.R243W,THRB:NM_001128176:exon8:c.C727T:p.R243W,THRB:NM_001128177:exon8:c.C727T:p.R243W,THRB:NM_001354709:exon8:c.C727T:p.R243W,THRB:NM_001354710:exon8:c.C727T:p.R243W,TH…	0.001	pathogenic	0.005	pathogenic	1.0	pathogenic	0.998	pathogenic	2.36	pathogenic	0.99	pathogenic	-3.93	pathogenic
TG	27735	single nucleotide variant	NM_003235.5(TG):c.5995C>T (p.Arg1999Trp)	7038	TG	HGNC:11764	Benign	0	Sep 10, 2021	2076740	-	RCV000013533|RCV000251808|RCV000277644|RCV001723563	MONDO:MONDO:0011982,MedGen:C1842444,OMIM:608175|MedGen:CN169374|MONDO:MONDO:0010135,MedGen:C0342194,OMIM:274700,Orphanet:95716|MedGen:CN517202	Autoimmune thyroid disease, susceptibility to, 3|not specified|Iodotyrosyl coupling defect|not provided	germline	germline	GRCh37	NC_000008.10	8	133984058	133984058	na	na	8q24.22	criteria provided, multiple submitters, no conflicts	5	-	N	ClinGen:CA122634,UniProtKB:P01266#VAR_010220,OMIM:188450.0008	3	12696	133984058	C	T	TG:NM_003235:exon33:c.C5995T:p.R1999W	0.082	benign	0.043	pathogenic	0.025	benign	0.006	benign	1.295	pathogenic	0.05	benign	-0.19	benign
TG	27736	single nucleotide variant	NM_003235.5(TG):c.2200T>G (p.Ser734Ala)	7038	TG	HGNC:11764	Benign	0	Sep 10, 2021	180223	-	RCV000013534|RCV000253912|RCV000309189	MONDO:MONDO:0011982,MedGen:C1842444,OMIM:608175|MedGen:CN169374|MONDO:MONDO:0010135,MedGen:C0342194,OMIM:274700,Orphanet:95716	Autoimmune thyroid disease, susceptibility to, 3|not specified|Iodotyrosyl coupling defect	germline	germline	GRCh37	NC_000008.10	8	133900252	133900252	na	na	8q24.22	criteria provided, multiple submitters, no conflicts	6	-	N	ClinGen:CA122636,UniProtKB:P01266#VAR_010213,OMIM:188450.0009	3	12697	133900252	T	G	TG:NM_003235:exon10:c.T2200G:p.S734A	1.0	benign	1.0	benign	0.0	benign	0.0	benign	-2.62	benign	0.0	benign	0.08	benign
TG	27737	single nucleotide variant	NM_003235.5(TG):c.3082A>G (p.Met1028Val)	7038	TG	HGNC:11764	Benign	0	Sep 10, 2021	853326	-	RCV000013535|RCV000254213|RCV000368266|RCV001675580	MONDO:MONDO:0011982,MedGen:C1842444,OMIM:608175|MedGen:CN169374|MONDO:MONDO:0010135,MedGen:C0342194,OMIM:274700,Orphanet:95716|MedGen:CN517202	Autoimmune thyroid disease, susceptibility to, 3|not specified|Iodotyrosyl coupling defect|not provided	germline	germline	GRCh37	NC_000008.10	8	133909974	133909974	na	na	8q24.22	criteria provided, multiple submitters, no conflicts	7	-	N	ClinGen:CA122638,UniProtKB:P01266#VAR_010215,OMIM:188450.0010	3	12698	133909974	A	G	TG:NM_003235:exon12:c.A3082G:p.M1028V	1.0	benign	1.0	benign	0.0	benign	0.0	benign	-1.81	benign	0.01	benign	0.21	benign
TG	27739	single nucleotide variant	NM_003235.5(TG):c.6725G>A (p.Arg2242His)	7038	TG	HGNC:11764	Pathogenic	1	Oct 11, 2019	2069566	-	RCV000013537|RCV001329060|RCV001551747	MONDO:MONDO:0010135,MedGen:C0342194,OMIM:274700,Orphanet:95716|MONDO:MONDO:0011982,MedGen:C1842444,OMIM:608175|MedGen:CN517202	Iodotyrosyl coupling defect|Autoimmune thyroid disease, susceptibility to, 3|not provided	germline;unknown	germline	GRCh37	NC_000008.10	8	134030185	134030185	na	na	8q24.22	criteria provided, multiple submitters, no conflicts	4	-	N	ClinGen:CA210705,UniProtKB:P01266#VAR_016863,OMIM:188450.0012	3	12700	134030185	G	A	TG:NM_003235:exon38:c.G6725A:p.R2242H	0.0	pathogenic	0.001	pathogenic	1.0	pathogenic	1.0	pathogenic	4.535	pathogenic	0.85	pathogenic	-1.59	pathogenic
TG	27744	single nucleotide variant	NM_003235.5(TG):c.7007G>A (p.Arg2336Gln)	7038	TG	HGNC:11764	Likely pathogenic	1	Sep 03, 2021	121912650	-	RCV000013542|RCV002496347	MONDO:MONDO:0010135,MedGen:C0342194,OMIM:274700,Orphanet:95716|MONDO:MONDO:0011982,MedGen:C1842444,OMIM:608175;MONDO:MONDO:0010135,MedGen:C0342194,OMIM:274700,Orphanet:95716	Iodotyrosyl coupling defect|Autoimmune thyroid disease, susceptibility to, 3;Iodotyrosyl coupling defect	germline;unknown	germline	GRCh37	NC_000008.10	8	134034366	134034366	na	na	8q24.22	criteria provided, single submitter	2	-	N	ClinGen:CA210711,UniProtKB:P01266#VAR_063037,OMIM:188450.0017	3	12705	134034366	G	A	TG:NM_003235:exon40:c.G7007A:p.R2336Q	0.0	pathogenic	0.0	pathogenic	1.0	pathogenic	1.0	pathogenic	5.125	pathogenic	0.9	pathogenic	-2.71	pathogenic
THBD	27753	single nucleotide variant	NM_000361.3(THBD):c.1456G>T (p.Asp486Tyr)	7056	THBD	HGNC:11784	Benign	0	Nov 03, 2022	41348347	-	RCV000013551|RCV000263795|RCV000949435|RCV001818153|RCV002293979	MONDO:MONDO:0013775,MedGen:C3280976,OMIM:614486,Orphanet:436169|MONDO:MONDO:0013044,MedGen:C2752036,OMIM:612926|MedGen:CN517202|MedGen:CN169374|Human Phenotype Ontology:HP:0000112,MONDO:MONDO:0005240,MedGen:C0022658	Thrombomodulin-related bleeding disorder|Atypical hemolytic-uremic syndrome with thrombomodulin anomaly|not provided|not specified|Kidney disorder	germline	germline	GRCh37	NC_000020.10	20	23028686	23028686	na	na	20p11.21	criteria provided, multiple submitters, no conflicts	6	-	N	ClinGen:CA122642,UniProtKB:P07204#VAR_011371,OMIM:188040.0001	3	12714	23028686	C	A	THBD:NM_000361:exon1:c.G1456T:p.D486Y	0.274	benign	0.091	benign	0.539	pathogenic	0.086	benign	1.83	pathogenic	0.02	benign	-1.33	benign
FGFR2	28302	single nucleotide variant	NM_000141.5(FGFR2):c.1025G>A (p.Cys342Tyr)	2263	FGFR2	HGNC:3689	Pathogenic/Likely pathogenic	1	Jul 01, 2023	121918487	-	RCV000014173|RCV000014174|RCV000547490|RCV000762801|RCV001090933|RCV001196204|RCV001730471	Human Phenotype Ontology:HP:0004439,MONDO:MONDO:0007405,MeSH:D003394,MedGen:C0010273,OMIM:123500,Orphanet:207|MONDO:MONDO:0007043,MedGen:C0220658,OMIM:101600,Orphanet:710|MedGen:CN231480|11 conditions|MedGen:C3661900|MONDO:MONDO:0020667,MedGen:C2936791,OMIM:207410,Orphanet:596008,Orphanet:83|Human Phenotype Ontology:HP:0001363,Human Phenotype Ontology:HP:0001365,Human Phenotype Ontology:HP:000449…	Craniofacial dysostosis|Pfeiffer syndrome|FGFR2-related craniosynostosis|11 conditions|not provided|Antley-Bixler syndrome without genital anomalies or disordered steroidogenesis|Craniosynostosis syndrome	germline;somatic;unknown	germline/somatic	GRCh37	NC_000010.10	10	123276892	123276892	na	na	10q26.13	criteria provided, multiple submitters, no conflicts	14	-	N	ClinGen:CA280168,UniProtKB:P21802#VAR_004139,OMIM:176943.0001	3	13263	123276892	C	T	FGFR2:NM_001144916:exon5:c.G680A:p.C227Y,FGFR2:NM_001144918:exon6:c.G680A:p.C227Y,FGFR2:NM_023029:exon6:c.G758A:p.C253Y,FGFR2:NM_001144915:exon7:c.G758A:p.C253Y,FGFR2:NM_001320654:exon7:c.G341A:p.C114Y,FGFR2:NM_000141:exon8:c.G1025A:p.C342Y,FGFR2:NM_001320658:exon8:c.G1025A:p.C342Y	0.0	pathogenic	0.0	pathogenic	1.0	pathogenic	0.994	pathogenic	4.415	pathogenic	1.0	pathogenic	-5.46	pathogenic
FGFR2	28303	single nucleotide variant	NM_000141.5(FGFR2):c.1018T>C (p.Tyr340His)	2263	FGFR2	HGNC:3689	Pathogenic	1	Jul 26, 2022	121918489	-	RCV000014175|RCV001214882|RCV001723564	Human Phenotype Ontology:HP:0004439,MONDO:MONDO:0007405,MeSH:D003394,MedGen:C0010273,OMIM:123500,Orphanet:207|MedGen:CN231480|MedGen:C3661900	Craniofacial dysostosis|FGFR2-related craniosynostosis|not provided	germline;unknown	germline	GRCh37	NC_000010.10	10	123276899	123276899	na	na	10q26.13	criteria provided, multiple submitters, no conflicts	6	-	N	ClinGen:CA280169,UniProtKB:P21802#VAR_004134,OMIM:176943.0004	3	13264	123276899	A	G	FGFR2:NM_001144916:exon5:c.T673C:p.Y225H,FGFR2:NM_001144918:exon6:c.T673C:p.Y225H,FGFR2:NM_023029:exon6:c.T751C:p.Y251H,FGFR2:NM_001144915:exon7:c.T751C:p.Y251H,FGFR2:NM_001320654:exon7:c.T334C:p.Y112H,FGFR2:NM_000141:exon8:c.T1018C:p.Y340H,FGFR2:NM_001320658:exon8:c.T1018C:p.Y340H	0.0	pathogenic	0.0	pathogenic	1.0	pathogenic	0.997	pathogenic	4.425	pathogenic	0.98	pathogenic	-6.26	pathogenic
FGFR2	28304	single nucleotide variant	NM_000141.5(FGFR2):c.1061C>G (p.Ser354Cys)	2263	FGFR2	HGNC:3689	Pathogenic	1	Jun 08, 2022	121918490	-	RCV000014176|RCV000623131|RCV000655419|RCV001565300|RCV002287333	Human Phenotype Ontology:HP:0004439,MONDO:MONDO:0007405,MeSH:D003394,MedGen:C0010273,OMIM:123500,Orphanet:207|MeSH:D030342,MedGen:C0950123|MedGen:CN231480|MedGen:C3661900|	Craniofacial dysostosis|Inborn genetic diseases|FGFR2-related craniosynostosis|not provided|See cases	germline;unknown	germline	GRCh37	NC_000010.10	10	123276856	123276856	na	na	10q26.13	criteria provided, multiple submitters, no conflicts	8	-	N	ClinGen:CA280170,UniProtKB:P21802#VAR_004144,OMIM:176943.0005	3	13265	123276856	G	C	FGFR2:NM_001144916:exon5:c.C716G:p.S239C,FGFR2:NM_001144918:exon6:c.C716G:p.S239C,FGFR2:NM_023029:exon6:c.C794G:p.S265C,FGFR2:NM_001144915:exon7:c.C794G:p.S265C,FGFR2:NM_001320654:exon7:c.C377G:p.S126C,FGFR2:NM_000141:exon8:c.C1061G:p.S354C,FGFR2:NM_001320658:exon8:c.C1061G:p.S354C	0.0	pathogenic	0.001	pathogenic	0.999	pathogenic	0.94	pathogenic	3.05	pathogenic	1.0	pathogenic	-0.4	benign
FGFR2	28305	single nucleotide variant	NM_000141.5(FGFR2):c.1024T>C (p.Cys342Arg)	2263	FGFR2	HGNC:3689	Pathogenic	1	Jul 01, 2023	121918488	-	RCV000014178|RCV000014180|RCV000014177|RCV000014179|RCV000534888|RCV001723565	MONDO:MONDO:0007043,MedGen:C0220658,OMIM:101600,Orphanet:710|MONDO:MONDO:0020667,MedGen:C2936791,OMIM:207410,Orphanet:596008,Orphanet:83|Human Phenotype Ontology:HP:0004439,MONDO:MONDO:0007405,MeSH:D003394,MedGen:C0010273,OMIM:123500,Orphanet:207|MONDO:MONDO:0007400,MedGen:C0795998,OMIM:123150,Orphanet:1540|MedGen:CN231480|MedGen:C3661900	Pfeiffer syndrome|Antley-Bixler syndrome without genital anomalies or disordered steroidogenesis|Craniofacial dysostosis|Jackson-Weiss syndrome|FGFR2-related craniosynostosis|not provided	germline	germline	GRCh37	NC_000010.10	10	123276893	123276893	na	na	10q26.13	criteria provided, multiple submitters, no conflicts	8	-	N	ClinGen:CA256745,UniProtKB:P21802#VAR_004137,OMIM:176943.0002	3	13266	123276893	A	G	FGFR2:NM_001144916:exon5:c.T679C:p.C227R,FGFR2:NM_001144918:exon6:c.T679C:p.C227R,FGFR2:NM_023029:exon6:c.T757C:p.C253R,FGFR2:NM_001144915:exon7:c.T757C:p.C253R,FGFR2:NM_001320654:exon7:c.T340C:p.C114R,FGFR2:NM_000141:exon8:c.T1024C:p.C342R,FGFR2:NM_001320658:exon8:c.T1024C:p.C342R	0.005	pathogenic	0.012	pathogenic	0.967	pathogenic	0.622	pathogenic	4.415	pathogenic	1.0	pathogenic	-5.46	pathogenic
FGFR2	28306	single nucleotide variant	NM_000141.5(FGFR2):c.1024T>A (p.Cys342Ser)	2263	FGFR2	HGNC:3689	Pathogenic	1	May 31, 2023	121918488	-	RCV000014181|RCV000014182|RCV000014183|RCV000415484|RCV000490034|RCV000655416	Human Phenotype Ontology:HP:0004439,MONDO:MONDO:0007405,MeSH:D003394,MedGen:C0010273,OMIM:123500,Orphanet:207|MONDO:MONDO:0007400,MedGen:C0795998,OMIM:123150,Orphanet:1540|MONDO:MONDO:0020667,MedGen:C2936791,OMIM:207410,Orphanet:596008,Orphanet:83|MONDO:MONDO:0007043,MedGen:C0220658,OMIM:101600,Orphanet:710|MedGen:C3661900|MedGen:CN231480	Craniofacial dysostosis|Jackson-Weiss syndrome|Antley-Bixler syndrome without genital anomalies or disordered steroidogenesis|Pfeiffer syndrome|not provided|FGFR2-related craniosynostosis	germline	germline	GRCh37	NC_000010.10	10	123276893	123276893	na	na	10q26.13	criteria provided, multiple submitters, no conflicts	5	-	N	ClinGen:CA256746,UniProtKB:P21802#VAR_004138,OMIM:176943.0003	3	13267	123276893	A	T	FGFR2:NM_001144916:exon5:c.T679A:p.C227S,FGFR2:NM_001144918:exon6:c.T679A:p.C227S,FGFR2:NM_023029:exon6:c.T757A:p.C253S,FGFR2:NM_001144915:exon7:c.T757A:p.C253S,FGFR2:NM_001320654:exon7:c.T340A:p.C114S,FGFR2:NM_000141:exon8:c.T1024A:p.C342S,FGFR2:NM_001320658:exon8:c.T1024A:p.C342S	0.0	pathogenic	0.001	pathogenic	1.0	pathogenic	0.978	pathogenic	4.415	pathogenic	1.0	pathogenic	-5.46	pathogenic
FGFR2	28308	single nucleotide variant	NM_000141.5(FGFR2):c.1031C>G (p.Ala344Gly)	2263	FGFR2	HGNC:3689	Pathogenic	1	May 07, 2022	121918492	-	RCV000014187|RCV000014188|RCV001851846|RCV003313919	MONDO:MONDO:0007400,MedGen:C0795998,OMIM:123150,Orphanet:1540|Human Phenotype Ontology:HP:0004439,MONDO:MONDO:0007405,MeSH:D003394,MedGen:C0010273,OMIM:123500,Orphanet:207|MedGen:CN231480|MONDO:MONDO:0007043,MedGen:C0220658,OMIM:101600,Orphanet:710	Jackson-Weiss syndrome|Craniofacial dysostosis|FGFR2-related craniosynostosis|Pfeiffer syndrome	germline;unknown	germline	GRCh37	NC_000010.10	10	123276886	123276886	na	na	10q26.13	criteria provided, multiple submitters, no conflicts	3	-	N	ClinGen:CA280171,UniProtKB:P21802#VAR_004140,OMIM:176943.0007	3	13269	123276886	G	C	FGFR2:NM_001144916:exon5:c.C686G:p.A229G,FGFR2:NM_001144918:exon6:c.C686G:p.A229G,FGFR2:NM_023029:exon6:c.C764G:p.A255G,FGFR2:NM_001144915:exon7:c.C764G:p.A255G,FGFR2:NM_001320654:exon7:c.C347G:p.A116G,FGFR2:NM_000141:exon8:c.C1031G:p.A344G,FGFR2:NM_001320658:exon8:c.C1031G:p.A344G	0.002	pathogenic	0.006	pathogenic	0.999	pathogenic	0.977	pathogenic	1.29	pathogenic	0.99	pathogenic	-1.04	benign
FGFR2	28309	single nucleotide variant	NM_000141.5(FGFR2):c.983A>G (p.Tyr328Cys)	2263	FGFR2	HGNC:3689	Pathogenic	1	Aug 13, 2021	121918493	-	RCV000014189|RCV000798719	Human Phenotype Ontology:HP:0004439,MONDO:MONDO:0007405,MeSH:D003394,MedGen:C0010273,OMIM:123500,Orphanet:207|MedGen:CN231480	Craniofacial dysostosis|FGFR2-related craniosynostosis	germline	germline	GRCh37	NC_000010.10	10	123276934	123276934	na	na	10q26.13	criteria provided, multiple submitters, no conflicts	3	-	N	ClinGen:CA280172,UniProtKB:P21802#VAR_004130,OMIM:176943.0008	3	13270	123276934	T	C	FGFR2:NM_001144916:exon5:c.A638G:p.Y213C,FGFR2:NM_001144918:exon6:c.A638G:p.Y213C,FGFR2:NM_023029:exon6:c.A716G:p.Y239C,FGFR2:NM_001144915:exon7:c.A716G:p.Y239C,FGFR2:NM_001320654:exon7:c.A299G:p.Y100C,FGFR2:NM_000141:exon8:c.A983G:p.Y328C,FGFR2:NM_001320658:exon8:c.A983G:p.Y328C	0.016	pathogenic	0.125	benign	0.921	pathogenic	0.556	pathogenic	0.79	benign	0.99	pathogenic	-0.24	benign
FGFR2	28310	single nucleotide variant	NM_000141.5(FGFR2):c.1040C>G (p.Ser347Cys)	2263	FGFR2	HGNC:3689	Pathogenic/Likely pathogenic	1	Apr 06, 2023	121918494	-	RCV000014190|RCV000626619|RCV000655421|RCV000726654|RCV001823713	Human Phenotype Ontology:HP:0004439,MONDO:MONDO:0007405,MeSH:D003394,MedGen:C0010273,OMIM:123500,Orphanet:207|22 conditions|MedGen:CN231480|MedGen:C3661900|MONDO:MONDO:0007043,MedGen:C0220658,OMIM:101600,Orphanet:710	Craniofacial dysostosis|22 conditions|FGFR2-related craniosynostosis|not provided|Pfeiffer syndrome	germline;unknown	germline	GRCh37	NC_000010.10	10	123276877	123276877	na	na	10q26.13	criteria provided, multiple submitters, no conflicts	8	-	N	ClinGen:CA280173,UniProtKB:P21802#VAR_004142,OMIM:176943.0009	3	13271	123276877	G	C	FGFR2:NM_001144916:exon5:c.C695G:p.S232C,FGFR2:NM_001144918:exon6:c.C695G:p.S232C,FGFR2:NM_023029:exon6:c.C773G:p.S258C,FGFR2:NM_001144915:exon7:c.C773G:p.S258C,FGFR2:NM_001320654:exon7:c.C356G:p.S119C,FGFR2:NM_000141:exon8:c.C1040G:p.S347C,FGFR2:NM_001320658:exon8:c.C1040G:p.S347C	0.002	pathogenic	0.01	pathogenic	0.997	pathogenic	0.923	pathogenic	2.525	pathogenic	1.0	pathogenic	-0.49	benign
FGFR2	28311	single nucleotide variant	NM_000141.5(FGFR2):c.755C>G (p.Ser252Trp)	2263	FGFR2	HGNC:3689	Pathogenic	1	Jul 01, 2023	79184941	-	RCV000014191|RCV000014192|RCV000263144|RCV000422979|RCV000433250|RCV000431027|RCV000433942|RCV000438603|RCV000440715|RCV000552015|RCV002476961|RCV003335033	MONDO:MONDO:0007041,MedGen:C0001193,OMIM:101200,Orphanet:87|Human Phenotype Ontology:HP:0012114,MONDO:MONDO:0002447,MedGen:C0476089,OMIM:608089|MedGen:C3661900|MedGen:C0153574|MONDO:MONDO:0006485,MedGen:C0280630|MedGen:C0279763|MONDO:MONDO:0019796,MeSH:D000168,MedGen:C1510455|MeSH:D016889,MedGen:C0014170|Human Phenotype Ontology:HP:0033770,MONDO:MONDO:0005036,MedGen:C0278701|MedGen:CN231480|11 co…	Acrocephalosyndactyly type I|Endometrial carcinoma|not provided|Malignant neoplasm of body of uterus|Uterine carcinosarcoma|Endometrial Endometrioid Adenocarcinoma, Variant with Squamous Differentiation|Acrocephalosyndactyly|Endometrial neoplasm|Gastric adenocarcinoma|FGFR2-related craniosynostosis|11 conditions|FGFR2-related disorders	de novo;germline;somatic;unknown	germline/somatic	GRCh37	NC_000010.10	10	123279677	123279677	na	na	10q26.13	criteria provided, multiple submitters, no conflicts	29	-	N	ClinGen:CA122985,UniProtKB:P21802#VAR_004115,OMIM:176943.0010	3	13272	123279677	G	C	FGFR2:NM_001144916:exon4:c.C410G:p.S137W,FGFR2:NM_001144918:exon5:c.C410G:p.S137W,FGFR2:NM_023029:exon5:c.C488G:p.S163W,FGFR2:NM_001144913:exon6:c.C755G:p.S252W,FGFR2:NM_001144915:exon6:c.C488G:p.S163W,FGFR2:NM_001144919:exon6:c.C488G:p.S163W,FGFR2:NM_001320654:exon6:c.C71G:p.S24W,FGFR2:NM_000141:exon7:c.C755G:p.S252W,FGFR2:NM_001144917:exon7:c.C755G:p.S252W,FGFR2:NM_001320658:exon7:c.C755G:p.S25…	0.0	pathogenic	0.182	benign	1.0	pathogenic	0.997	pathogenic	3.43	pathogenic	1.0	pathogenic	-1.34	benign
FGFR2	28312	single nucleotide variant	NM_000141.5(FGFR2):c.758C>G (p.Pro253Arg)	2263	FGFR2	HGNC:3689	Pathogenic/Likely pathogenic	1	Aug 08, 2023	77543610	-	RCV000014193|RCV000436870|RCV000532721|RCV000489611|RCV000762803|RCV001197223|RCV003415698	MONDO:MONDO:0007041,MedGen:C0001193,OMIM:101200,Orphanet:87|Human Phenotype Ontology:HP:0012288,MONDO:MONDO:0005586,MeSH:D006258,MedGen:C0018671|MedGen:CN231480|MedGen:C3661900|11 conditions|MONDO:MONDO:0020667,MedGen:C2936791,OMIM:207410,Orphanet:596008,Orphanet:83|	Acrocephalosyndactyly type I|Head and neck neoplasm|FGFR2-related craniosynostosis|not provided|11 conditions|Antley-Bixler syndrome without genital anomalies or disordered steroidogenesis|FGFR2-related condition	germline;somatic;unknown	germline/somatic	GRCh37	NC_000010.10	10	123279674	123279674	na	na	10q26.13	criteria provided, multiple submitters, no conflicts	20	-	N	ClinGen:CA280174,UniProtKB:P21802#VAR_004117,OMIM:176943.0011	3	13273	123279674	G	C	FGFR2:NM_001144916:exon4:c.C413G:p.P138R,FGFR2:NM_001144918:exon5:c.C413G:p.P138R,FGFR2:NM_023029:exon5:c.C491G:p.P164R,FGFR2:NM_001144913:exon6:c.C758G:p.P253R,FGFR2:NM_001144915:exon6:c.C491G:p.P164R,FGFR2:NM_001144919:exon6:c.C491G:p.P164R,FGFR2:NM_001320654:exon6:c.C74G:p.P25R,FGFR2:NM_000141:exon7:c.C758G:p.P253R,FGFR2:NM_001144917:exon7:c.C758G:p.P253R,FGFR2:NM_001320658:exon7:c.C758G:p.P25…	0.0	pathogenic	0.18	benign	0.323	benign	0.506	pathogenic	1.7	pathogenic	1.0	pathogenic	-1.44	benign
FGFR2	28313	single nucleotide variant	NM_000141.5(FGFR2):c.1021A>C (p.Thr341Pro)	2263	FGFR2	HGNC:3689	Pathogenic	1	Mar 01, 2023	121918495	-	RCV000014194|RCV001037961|RCV001781263	MONDO:MONDO:0007043,MedGen:C0220658,OMIM:101600,Orphanet:710|MedGen:CN231480|MedGen:C3661900	Pfeiffer syndrome|FGFR2-related craniosynostosis|not provided	germline	germline	GRCh37	NC_000010.10	10	123276896	123276896	na	na	10q26.13	criteria provided, multiple submitters, no conflicts	6	-	N	ClinGen:CA280176,UniProtKB:P21802#VAR_004135,OMIM:176943.0012	3	13274	123276896	T	G	FGFR2:NM_001144916:exon5:c.A676C:p.T226P,FGFR2:NM_001144918:exon6:c.A676C:p.T226P,FGFR2:NM_023029:exon6:c.A754C:p.T252P,FGFR2:NM_001144915:exon7:c.A754C:p.T252P,FGFR2:NM_001320654:exon7:c.A337C:p.T113P,FGFR2:NM_000141:exon8:c.A1021C:p.T341P,FGFR2:NM_001320658:exon8:c.A1021C:p.T341P	0.001	pathogenic	0.003	pathogenic	0.978	pathogenic	0.9	pathogenic	2.995	pathogenic	1.0	pathogenic	-4.17	pathogenic
FGFR2	28314	single nucleotide variant	NM_000141.5(FGFR2):c.1026C>G (p.Cys342Trp)	2263	FGFR2	HGNC:3689	Pathogenic	1	Mar 08, 2022	121918496	-	RCV000014195|RCV000535651|RCV001588812	Human Phenotype Ontology:HP:0004439,MONDO:MONDO:0007405,MeSH:D003394,MedGen:C0010273,OMIM:123500,Orphanet:207|MedGen:CN231480|MedGen:C3661900	Craniofacial dysostosis|FGFR2-related craniosynostosis|not provided	germline	germline	GRCh37	NC_000010.10	10	123276891	123276891	na	na	10q26.13	criteria provided, multiple submitters, no conflicts	3	-	N	ClinGen:CA280177,UniProtKB:P21802#VAR_017271,OMIM:176943.0013	3	13275	123276891	G	C	FGFR2:NM_001144916:exon5:c.C681G:p.C227W,FGFR2:NM_001144918:exon6:c.C681G:p.C227W,FGFR2:NM_023029:exon6:c.C759G:p.C253W,FGFR2:NM_001144915:exon7:c.C759G:p.C253W,FGFR2:NM_001320654:exon7:c.C342G:p.C114W,FGFR2:NM_000141:exon8:c.C1026G:p.C342W,FGFR2:NM_001320658:exon8:c.C1026G:p.C342W	0.0	pathogenic	0.0	pathogenic	1.0	pathogenic	0.999	pathogenic	4.07	pathogenic	1.0	pathogenic	-5.46	pathogenic
FGFR2	28315	single nucleotide variant	NM_000141.5(FGFR2):c.866A>C (p.Gln289Pro)	2263	FGFR2	HGNC:3689	Pathogenic	1	Mar 08, 2023	121918497	-	RCV000014196|RCV000014197|RCV000415509|RCV001217538|RCV001572560	Human Phenotype Ontology:HP:0004439,MONDO:MONDO:0007405,MeSH:D003394,MedGen:C0010273,OMIM:123500,Orphanet:207|MONDO:MONDO:0007400,MedGen:C0795998,OMIM:123150,Orphanet:1540|MONDO:MONDO:0007043,MedGen:C0220658,OMIM:101600,Orphanet:710|MedGen:CN231480|MedGen:C3661900	Craniofacial dysostosis|Jackson-Weiss syndrome|Pfeiffer syndrome|FGFR2-related craniosynostosis|not provided	germline	germline	GRCh37	NC_000010.10	10	123279566	123279566	na	na	10q26.13	criteria provided, multiple submitters, no conflicts	5	-	N	ClinGen:CA280178,UniProtKB:P21802#VAR_004123,OMIM:176943.0014	3	13276	123279566	T	G	FGFR2:NM_001144916:exon4:c.A521C:p.Q174P,FGFR2:NM_001144918:exon5:c.A521C:p.Q174P,FGFR2:NM_023029:exon5:c.A599C:p.Q200P,FGFR2:NM_001144913:exon6:c.A866C:p.Q289P,FGFR2:NM_001144915:exon6:c.A599C:p.Q200P,FGFR2:NM_001144919:exon6:c.A599C:p.Q200P,FGFR2:NM_001320654:exon6:c.A182C:p.Q61P,FGFR2:NM_000141:exon7:c.A866C:p.Q289P,FGFR2:NM_001144917:exon7:c.A866C:p.Q289P,FGFR2:NM_001320658:exon7:c.A866C:p.Q2…	0.0	pathogenic	0.005	pathogenic	0.999	pathogenic	0.987	pathogenic	3.33	pathogenic	1.0	pathogenic	-0.31	benign
FGFR2	28316	single nucleotide variant	NM_000141.5(FGFR2):c.1124A>G (p.Tyr375Cys)	2263	FGFR2	HGNC:3689	Pathogenic/Likely pathogenic	1	Mar 26, 2023	121913478	-	RCV000014198|RCV000014199|RCV000224124|RCV000441051|RCV000549100|RCV000762799	MONDO:MONDO:0007412,MedGen:C1852406,OMIM:123790,Orphanet:1555|Human Phenotype Ontology:HP:0012114,MONDO:MONDO:0002447,MedGen:C0476089,OMIM:608089|MedGen:C3661900|MeSH:D016889,MedGen:C0014170|MedGen:CN231480|11 conditions	Beare-Stevenson cutis gyrata syndrome|Endometrial carcinoma|not provided|Endometrial neoplasm|FGFR2-related craniosynostosis|11 conditions	de novo;germline;somatic;unknown	germline/somatic	GRCh37	NC_000010.10	10	123274794	123274794	na	na	10q26.13	criteria provided, multiple submitters, no conflicts	10	-	N	ClinGen:CA122987,UniProtKB:P21802#VAR_017275,OMIM:176943.0015	3	13277	123274794	T	C	FGFR2:NM_001144914:exon6:c.A788G:p.Y263C,FGFR2:NM_001144916:exon6:c.A779G:p.Y260C,FGFR2:NM_001144918:exon7:c.A779G:p.Y260C,FGFR2:NM_023029:exon7:c.A857G:p.Y286C,FGFR2:NM_001144913:exon8:c.A1127G:p.Y376C,FGFR2:NM_001144915:exon8:c.A857G:p.Y286C,FGFR2:NM_001144919:exon8:c.A860G:p.Y287C,FGFR2:NM_001320654:exon8:c.A440G:p.Y147C,FGFR2:NM_000141:exon9:c.A1124G:p.Y375C,FGFR2:NM_001320658:exon9:c.A1124G:…	0.001	pathogenic	0.007	pathogenic	0.999	pathogenic	0.967	pathogenic	2.92	pathogenic	1.0	pathogenic	-2.35	pathogenic
FGFR2	28317	single nucleotide variant	NM_000141.5(FGFR2):c.1115C>G (p.Ser372Cys)	2263	FGFR2	HGNC:3689	Pathogenic	1	Jul 19, 2022	121913477	-	RCV000014200|RCV000424237|RCV001382546	MONDO:MONDO:0007412,MedGen:C1852406,OMIM:123790,Orphanet:1555|MeSH:D016889,MedGen:C0014170|MedGen:CN231480	Beare-Stevenson cutis gyrata syndrome|Endometrial neoplasm|FGFR2-related craniosynostosis	germline;somatic	germline/somatic	GRCh37	NC_000010.10	10	123274803	123274803	na	na	10q26.13	criteria provided, single submitter	3	-	N	ClinGen:CA256747,UniProtKB:P21802#VAR_017274,OMIM:176943.0016	3	13278	123274803	G	C	FGFR2:NM_001144914:exon6:c.C779G:p.S260C,FGFR2:NM_001144916:exon6:c.C770G:p.S257C,FGFR2:NM_001144918:exon7:c.C770G:p.S257C,FGFR2:NM_023029:exon7:c.C848G:p.S283C,FGFR2:NM_001144913:exon8:c.C1118G:p.S373C,FGFR2:NM_001144915:exon8:c.C848G:p.S283C,FGFR2:NM_001144919:exon8:c.C851G:p.S284C,FGFR2:NM_001320654:exon8:c.C431G:p.S144C,FGFR2:NM_000141:exon9:c.C1115G:p.S372C,FGFR2:NM_001320658:exon9:c.C1115G:…	0.002	pathogenic	0.022	pathogenic	0.996	pathogenic	0.917	pathogenic	2.44	pathogenic	1.0	pathogenic	-1.38	benign
FGFR2	28320	single nucleotide variant	NM_000141.5(FGFR2):c.870G>C (p.Trp290Cys)	2263	FGFR2	HGNC:3689	Pathogenic	1	Dec 20, 2022	121918499	-	RCV000014203|RCV000419759|RCV002254264|RCV003150929|RCV003421919	MONDO:MONDO:0007043,MedGen:C0220658,OMIM:101600,Orphanet:710|Human Phenotype Ontology:HP:0030359,MONDO:MONDO:0005097,MedGen:C0149782|MONDO:MONDO:0011921,MedGen:C1842937,OMIM:607842|MedGen:C3661900|	Pfeiffer syndrome|Squamous cell lung carcinoma|Aural atresia, congenital|not provided|FGFR2-related condition	germline;somatic	germline/somatic	GRCh37	NC_000010.10	10	123279562	123279562	na	na	10q26.13	criteria provided, multiple submitters, no conflicts	6	-	N	ClinGen:CA280182,UniProtKB:P21802#VAR_004124,OMIM:176943.0019	3	13281	123279562	C	G	FGFR2:NM_001144916:exon4:c.G525C:p.W175C,FGFR2:NM_001144918:exon5:c.G525C:p.W175C,FGFR2:NM_023029:exon5:c.G603C:p.W201C,FGFR2:NM_001144913:exon6:c.G870C:p.W290C,FGFR2:NM_001144915:exon6:c.G603C:p.W201C,FGFR2:NM_001144919:exon6:c.G603C:p.W201C,FGFR2:NM_001320654:exon6:c.G186C:p.W62C,FGFR2:NM_000141:exon7:c.G870C:p.W290C,FGFR2:NM_001144917:exon7:c.G870C:p.W290C,FGFR2:NM_001320658:exon7:c.G870C:p.W2…	0.0	pathogenic	0.0	pathogenic	1.0	pathogenic	1.0	pathogenic	4.435	pathogenic	1.0	pathogenic	-3.97	pathogenic
FGFR2	28321	single nucleotide variant	NM_000141.5(FGFR2):c.874A>G (p.Lys292Glu)	2263	FGFR2	HGNC:3689	Likely pathogenic	1	May 04, 2022	121918500	-	RCV000014204|RCV002513037	Human Phenotype Ontology:HP:0004439,MONDO:MONDO:0007405,MeSH:D003394,MedGen:C0010273,OMIM:123500,Orphanet:207|MedGen:CN231480	Craniofacial dysostosis|FGFR2-related craniosynostosis	germline	germline	GRCh37	NC_000010.10	10	123279558	123279558	na	na	10q26.13	criteria provided, single submitter	2	-	N	UniProtKB:P21802#VAR_004126,OMIM:176943.0020,ClinGen:CA280183	3	13282	123279558	T	C	FGFR2:NM_001144916:exon4:c.A529G:p.K177E,FGFR2:NM_001144918:exon5:c.A529G:p.K177E,FGFR2:NM_023029:exon5:c.A607G:p.K203E,FGFR2:NM_001144913:exon6:c.A874G:p.K292E,FGFR2:NM_001144915:exon6:c.A607G:p.K203E,FGFR2:NM_001144919:exon6:c.A607G:p.K203E,FGFR2:NM_001320654:exon6:c.A190G:p.K64E,FGFR2:NM_000141:exon7:c.A874G:p.K292E,FGFR2:NM_001144917:exon7:c.A874G:p.K292E,FGFR2:NM_001320658:exon7:c.A874G:p.K2…	0.001	pathogenic	0.005	pathogenic	0.996	pathogenic	0.942	pathogenic	3.775	pathogenic	1.0	pathogenic	-4.28	pathogenic
FGFR2	28322	single nucleotide variant	NM_000141.5(FGFR2):c.868T>C (p.Trp290Arg)	2263	FGFR2	HGNC:3689	Pathogenic	1	Oct 23, 2022	121918501	-	RCV000014205|RCV000537718|RCV001549469	Human Phenotype Ontology:HP:0004439,MONDO:MONDO:0007405,MeSH:D003394,MedGen:C0010273,OMIM:123500,Orphanet:207|MedGen:CN231480|MedGen:C3661900	Craniofacial dysostosis|FGFR2-related craniosynostosis|not provided	germline	germline	GRCh37	NC_000010.10	10	123279564	123279564	na	na	10q26.13	criteria provided, multiple submitters, no conflicts	7	-	N	ClinGen:CA280185,UniProtKB:P21802#VAR_004125,OMIM:176943.0021	3	13283	123279564	A	G	FGFR2:NM_001144916:exon4:c.T523C:p.W175R,FGFR2:NM_001144918:exon5:c.T523C:p.W175R,FGFR2:NM_023029:exon5:c.T601C:p.W201R,FGFR2:NM_001144913:exon6:c.T868C:p.W290R,FGFR2:NM_001144915:exon6:c.T601C:p.W201R,FGFR2:NM_001144919:exon6:c.T601C:p.W201R,FGFR2:NM_001320654:exon6:c.T184C:p.W62R,FGFR2:NM_000141:exon7:c.T868C:p.W290R,FGFR2:NM_001144917:exon7:c.T868C:p.W290R,FGFR2:NM_001320658:exon7:c.T868C:p.W2…	0.0	pathogenic	0.0	pathogenic	1.0	pathogenic	0.999	pathogenic	4.435	pathogenic	1.0	pathogenic	-3.97	pathogenic
FGFR2	28323	single nucleotide variant	NM_000141.5(FGFR2):c.868T>G (p.Trp290Gly)	2263	FGFR2	HGNC:3689	Pathogenic	1	Sep 17, 2016	121918501	-	RCV000014206	Human Phenotype Ontology:HP:0004439,MONDO:MONDO:0007405,MeSH:D003394,MedGen:C0010273,OMIM:123500,Orphanet:207	Craniofacial dysostosis	germline	germline	GRCh37	NC_000010.10	10	123279564	123279564	na	na	10q26.13	criteria provided, single submitter	2	-	N	ClinGen:CA280187,UniProtKB:P21802#VAR_017266,OMIM:176943.0022	3	13284	123279564	A	C	FGFR2:NM_001144916:exon4:c.T523G:p.W175G,FGFR2:NM_001144918:exon5:c.T523G:p.W175G,FGFR2:NM_023029:exon5:c.T601G:p.W201G,FGFR2:NM_001144913:exon6:c.T868G:p.W290G,FGFR2:NM_001144915:exon6:c.T601G:p.W201G,FGFR2:NM_001144919:exon6:c.T601G:p.W201G,FGFR2:NM_001320654:exon6:c.T184G:p.W62G,FGFR2:NM_000141:exon7:c.T868G:p.W290G,FGFR2:NM_001144917:exon7:c.T868G:p.W290G,FGFR2:NM_001320658:exon7:c.T868G:p.W2…	0.001	pathogenic	0.0	pathogenic	1.0	pathogenic	0.998	pathogenic	4.435	pathogenic	1.0	pathogenic	-3.96	pathogenic
FGFR2	28325	single nucleotide variant	NM_000141.5(FGFR2):c.1052C>G (p.Ser351Cys)	2263	FGFR2	HGNC:3689	Pathogenic	1	Aug 11, 2023	121918502	-	RCV000014208|RCV000014209|RCV000256107|RCV000415503|RCV000528973|RCV003313920	MONDO:MONDO:0019661,MedGen:C5438850,Orphanet:93260|MONDO:MONDO:0020667,MedGen:C2936791,OMIM:207410,Orphanet:596008,Orphanet:83|MedGen:C3661900|MONDO:MONDO:0007043,MedGen:C0220658,OMIM:101600,Orphanet:710|MedGen:CN231480|Human Phenotype Ontology:HP:0004439,MONDO:MONDO:0007405,MeSH:D003394,MedGen:C0010273,OMIM:123500,Orphanet:207	Pfeiffer syndrome type 3|Antley-Bixler syndrome without genital anomalies or disordered steroidogenesis|not provided|Pfeiffer syndrome|FGFR2-related craniosynostosis|Craniofacial dysostosis	de novo;germline;unknown	germline	GRCh37	NC_000010.10	10	123276865	123276865	na	na	10q26.13	criteria provided, multiple submitters, no conflicts	10	-	N	ClinGen:CA122991,UniProtKB:P21802#VAR_004143,OMIM:176943.0024	3	13286	123276865	G	C	FGFR2:NM_001144916:exon5:c.C707G:p.S236C,FGFR2:NM_001144918:exon6:c.C707G:p.S236C,FGFR2:NM_023029:exon6:c.C785G:p.S262C,FGFR2:NM_001144915:exon7:c.C785G:p.S262C,FGFR2:NM_001320654:exon7:c.C368G:p.S123C,FGFR2:NM_000141:exon8:c.C1052G:p.S351C,FGFR2:NM_001320658:exon8:c.C1052G:p.S351C	0.001	pathogenic	0.002	pathogenic	0.978	pathogenic	0.823	pathogenic	2.54	pathogenic	1.0	pathogenic	-0.31	benign
FGFR2	28328	single nucleotide variant	NM_000141.5(FGFR2):c.943G>T (p.Ala315Ser)	2263	FGFR2	HGNC:3689	Pathogenic	1	Jun 04, 2022	121918504	-	RCV000014212|RCV000856813|RCV001280733|RCV001851847|RCV002496355	MedGen:C4016346|Human Phenotype Ontology:HP:0004439,MONDO:MONDO:0007405,MeSH:D003394,MedGen:C0010273,OMIM:123500,Orphanet:207|MedGen:C3661900|MedGen:CN231480|11 conditions	Craniosynostosis, nonsyndromic unicoronal|Craniofacial dysostosis|not provided|FGFR2-related craniosynostosis|11 conditions	germline;unknown	germline	GRCh37	NC_000010.10	10	123276974	123276974	na	na	10q26.13	criteria provided, multiple submitters, no conflicts	7	-	N	ClinGen:CA122992,UniProtKB:P21802#VAR_017267,OMIM:176943.0028	3	13289	123276974	C	A	FGFR2:NM_001144916:exon5:c.G598T:p.A200S,FGFR2:NM_001144918:exon6:c.G598T:p.A200S,FGFR2:NM_023029:exon6:c.G676T:p.A226S,FGFR2:NM_001144915:exon7:c.G676T:p.A226S,FGFR2:NM_001320654:exon7:c.G259T:p.A87S,FGFR2:NM_000141:exon8:c.G943T:p.A315S,FGFR2:NM_001320658:exon8:c.G943T:p.A315S	0.259	benign	0.332	benign	0.001	benign	0.013	benign	-0.17	benign	0.98	pathogenic	-0.18	benign
FGFR2	28329	single nucleotide variant	NM_000141.5(FGFR2):c.799T>C (p.Ser267Pro)	2263	FGFR2	HGNC:3689	Pathogenic	1	Sep 08, 2023	121918505	-	RCV000014213|RCV000408850|RCV000435703|RCV000690962|RCV002508123	MONDO:MONDO:0007043,MedGen:C0220658,OMIM:101600,Orphanet:710|Human Phenotype Ontology:HP:0004439,MONDO:MONDO:0007405,MeSH:D003394,MedGen:C0010273,OMIM:123500,Orphanet:207|MedGen:C3661900|MedGen:CN231480|Human Phenotype Ontology:HP:0012126,MONDO:MONDO:0001056,MeSH:D013274,MedGen:C0024623,OMIM:613659	Pfeiffer syndrome|Craniofacial dysostosis|not provided|FGFR2-related craniosynostosis|Stomach cancer	de novo;germline;somatic;unknown	germline/somatic	GRCh37	NC_000010.10	10	123279633	123279633	na	na	10q26.13	criteria provided, multiple submitters, no conflicts	6	-	N	ClinGen:CA210548,UniProtKB:P21802#VAR_004118,OMIM:176943.0029	3	13290	123279633	A	G	FGFR2:NM_001144916:exon4:c.T454C:p.S152P,FGFR2:NM_001144918:exon5:c.T454C:p.S152P,FGFR2:NM_023029:exon5:c.T532C:p.S178P,FGFR2:NM_001144913:exon6:c.T799C:p.S267P,FGFR2:NM_001144915:exon6:c.T532C:p.S178P,FGFR2:NM_001144919:exon6:c.T532C:p.S178P,FGFR2:NM_001320654:exon6:c.T115C:p.S39P,FGFR2:NM_000141:exon7:c.T799C:p.S267P,FGFR2:NM_001144917:exon7:c.T799C:p.S267P,FGFR2:NM_001320658:exon7:c.T799C:p.S2…	0.001	pathogenic	0.002	pathogenic	0.99	pathogenic	0.841	pathogenic	1.34	pathogenic	1.0	pathogenic	-0.3	benign
FGFR2	28332	single nucleotide variant	NM_000141.5(FGFR2):c.870G>T (p.Trp290Cys)	2263	FGFR2	HGNC:3689	Pathogenic	1	Jul 01, 2023	121918499	-	RCV000014217|RCV000014218|RCV000655418|RCV001268882|RCV002490362	MONDO:MONDO:0007043,MedGen:C0220658,OMIM:101600,Orphanet:710|MedGen:CN042705|MedGen:CN231480|MedGen:C3661900|11 conditions	Pfeiffer syndrome|Craniofacial-skeletal-dermatologic dysplasia|FGFR2-related craniosynostosis|not provided|11 conditions	germline;unknown	germline	GRCh37	NC_000010.10	10	123279562	123279562	na	na	10q26.13	criteria provided, multiple submitters, no conflicts	10	-	N	ClinGen:CA122994,UniProtKB:P21802#VAR_004124,OMIM:176943.0032	3	13293	123279562	C	A	FGFR2:NM_001144916:exon4:c.G525T:p.W175C,FGFR2:NM_001144918:exon5:c.G525T:p.W175C,FGFR2:NM_023029:exon5:c.G603T:p.W201C,FGFR2:NM_001144913:exon6:c.G870T:p.W290C,FGFR2:NM_001144915:exon6:c.G603T:p.W201C,FGFR2:NM_001144919:exon6:c.G603T:p.W201C,FGFR2:NM_001320654:exon6:c.G186T:p.W62C,FGFR2:NM_000141:exon7:c.G870T:p.W290C,FGFR2:NM_001144917:exon7:c.G870T:p.W290C,FGFR2:NM_001320658:exon7:c.G870T:p.W2…	0.0	pathogenic	0.0	pathogenic	1.0	pathogenic	1.0	pathogenic	4.435	pathogenic	1.0	pathogenic	-3.97	pathogenic
FGFR2	28333	single nucleotide variant	NM_000141.5(FGFR2):c.1694A>C (p.Glu565Ala)	2263	FGFR2	HGNC:3689	Pathogenic/Likely pathogenic	1	Oct 16, 2023	121918506	-	RCV000014219|RCV000434384|RCV001851848|RCV003441716	MONDO:MONDO:0007043,MedGen:C0220658,OMIM:101600,Orphanet:710|Human Phenotype Ontology:HP:0001363,Human Phenotype Ontology:HP:0001365,Human Phenotype Ontology:HP:0004494,Human Phenotype Ontology:HP:0005448,Human Phenotype Ontology:HP:0005457,Human Phenotype Ontology:HP:0005467,Human Phenotype Ontology:HP:0008492,MONDO:MONDO:0015469,MeSH:D003398,MedGen:C0010278,OMIM:PS123100,Orphanet:1531|MedGen:CN…	Pfeiffer syndrome|Craniosynostosis syndrome|FGFR2-related craniosynostosis|not provided	germline;somatic	germline/somatic	GRCh37	NC_000010.10	10	123256215	123256215	na	na	10q26.13	criteria provided, multiple submitters, no conflicts	7	-	N	ClinGen:CA280192,OMIM:176943.0033	3	13294	123256215	T	G	FGFR2:NM_001144914:exon10:c.A1358C:p.E453A,FGFR2:NM_001144916:exon10:c.A1349C:p.E450A,FGFR2:NM_001144917:exon11:c.A1346C:p.E449A,FGFR2:NM_001144918:exon11:c.A1343C:p.E448A,FGFR2:NM_023029:exon11:c.A1427C:p.E476A,FGFR2:NM_001144913:exon12:c.A1697C:p.E566A,FGFR2:NM_001144915:exon12:c.A1427C:p.E476A,FGFR2:NM_001144919:exon12:c.A1430C:p.E477A,FGFR2:NM_001320654:exon12:c.A1010C:p.E337A,FGFR2:NM_000141…	0.01	pathogenic	0.001	pathogenic	1.0	pathogenic	0.998	pathogenic	3.32	pathogenic	1.0	pathogenic	-3.85	pathogenic
FGFR2	28335	single nucleotide variant	NM_000141.5(FGFR2):c.1942G>A (p.Ala648Thr)	2263	FGFR2	HGNC:3689	Pathogenic	1	Jan 26, 2023	121918508	-	RCV000014222|RCV001291623|RCV002513038	MONDO:MONDO:0007872,MedGen:C0265269,OMIM:PS149730,Orphanet:2363|MedGen:C3661900|MedGen:CN231480	Levy-Hollister syndrome|not provided|FGFR2-related craniosynostosis	germline;inherited	germline	GRCh37	NC_000010.10	10	123247549	123247549	na	na	10q26.13	criteria provided, multiple submitters, no conflicts	5	-	N	ClinGen:CA122998,UniProtKB:P21802#VAR_029885,OMIM:176943.0035	3	13296	123247549	C	T	FGFR2:NM_001144914:exon11:c.G1606A:p.A536T,FGFR2:NM_001144916:exon11:c.G1597A:p.A533T,FGFR2:NM_001144917:exon12:c.G1594A:p.A532T,FGFR2:NM_001144918:exon12:c.G1591A:p.A531T,FGFR2:NM_023029:exon12:c.G1675A:p.A559T,FGFR2:NM_001144913:exon13:c.G1945A:p.A649T,FGFR2:NM_001144915:exon13:c.G1675A:p.A559T,FGFR2:NM_001144919:exon13:c.G1678A:p.A560T,FGFR2:NM_001320654:exon13:c.G1258A:p.A420T,FGFR2:NM_000141…	0.0	pathogenic	0.015	pathogenic	1.0	pathogenic	1.0	pathogenic	1.6	pathogenic	1.0	pathogenic	-3.25	pathogenic
FGFR2	28337	single nucleotide variant	NM_000141.5(FGFR2):c.1882G>A (p.Ala628Thr)	2263	FGFR2	HGNC:3689	Pathogenic	1	Dec 07, 2016	121918509	-	RCV000014224|RCV000414415	MONDO:MONDO:0007872,MedGen:C0265269,OMIM:PS149730,Orphanet:2363|MedGen:CN517202	Levy-Hollister syndrome|not provided	germline	germline	GRCh37	NC_000010.10	10	123247609	123247609	na	na	10q26.13	criteria provided, single submitter	2	-	N	ClinGen:CA123000,UniProtKB:P21802#VAR_029884,OMIM:176943.0037	3	13298	123247609	C	T	FGFR2:NM_001144914:exon11:c.G1546A:p.A516T,FGFR2:NM_001144916:exon11:c.G1537A:p.A513T,FGFR2:NM_001144917:exon12:c.G1534A:p.A512T,FGFR2:NM_001144918:exon12:c.G1531A:p.A511T,FGFR2:NM_023029:exon12:c.G1615A:p.A539T,FGFR2:NM_001144913:exon13:c.G1885A:p.A629T,FGFR2:NM_001144915:exon13:c.G1615A:p.A539T,FGFR2:NM_001144919:exon13:c.G1618A:p.A540T,FGFR2:NM_001320654:exon13:c.G1198A:p.A400T,FGFR2:NM_000141…	0.0	pathogenic	0.0	pathogenic	1.0	pathogenic	1.0	pathogenic	2.13	pathogenic	1.0	pathogenic	-2.88	pathogenic
FGFR2	28339	single nucleotide variant	NM_000141.5(FGFR2):c.962A>C (p.Asp321Ala)	2263	FGFR2	HGNC:3689	Pathogenic	1	May 17, 2022	121918510	-	RCV000014227|RCV002513039	MONDO:MONDO:0007043,MedGen:C0220658,OMIM:101600,Orphanet:710|MedGen:CN231480	Pfeiffer syndrome|FGFR2-related craniosynostosis	germline	germline	GRCh37	NC_000010.10	10	123276955	123276955	na	na	10q26.13	criteria provided, multiple submitters, no conflicts	3	-	N	ClinGen:CA280195,UniProtKB:P21802#VAR_004129,OMIM:176943.0039	3	13300	123276955	T	G	FGFR2:NM_001144916:exon5:c.A617C:p.D206A,FGFR2:NM_001144918:exon6:c.A617C:p.D206A,FGFR2:NM_023029:exon6:c.A695C:p.D232A,FGFR2:NM_001144915:exon7:c.A695C:p.D232A,FGFR2:NM_001320654:exon7:c.A278C:p.D93A,FGFR2:NM_000141:exon8:c.A962C:p.D321A,FGFR2:NM_001320658:exon8:c.A962C:p.D321A	0.002	pathogenic	0.058	benign	0.153	benign	0.236	benign	1.895	pathogenic	0.96	pathogenic	-0.15	benign
POLG	28534	single nucleotide variant	NM_002693.3(POLG):c.2864A>G (p.Tyr955Cys)	5428	POLG	HGNC:9179	Pathogenic	1	Apr 19, 2022	113994099	-	RCV000014439|RCV000508934|RCV000676321|RCV000758267	MONDO:MONDO:0024528,MedGen:C1834846,OMIM:157640|MONDO:MONDO:0044970,MedGen:C0751651,Orphanet:68380|MedGen:CN517202|MONDO:MONDO:0008758,MedGen:C0205710,OMIM:203700,Orphanet:726	Progressive external ophthalmoplegia with mitochondrial DNA deletions, autosomal dominant 1|Mitochondrial disease|not provided|Progressive sclerosing poliodystrophy	germline;unknown	germline	GRCh37	NC_000015.9	15	89864114	89864114	na	na	15q26.1	criteria provided, multiple submitters, no conflicts	8	-	N	ClinGen:CA341291,UniProtKB:P54098#VAR_012156,OMIM:174763.0001	3	13495	89864114	T	C	POLG:NM_001126131:exon18:c.A2864G:p.Y955C,POLG:NM_002693:exon18:c.A2864G:p.Y955C	0.0	pathogenic	0.0	pathogenic	1.0	pathogenic	0.999	pathogenic	3.545	pathogenic	0.85	pathogenic	-7.04	pathogenic
POLG	28535	single nucleotide variant	NM_002693.3(POLG):c.1399G>A (p.Ala467Thr)	5428	POLG	HGNC:9179	Pathogenic	1	Oct 01, 2023	113994095	-	RCV000014440|RCV000014441|RCV000014442|RCV000014443|RCV000188658|RCV000184011|RCV000347876|RCV000515354|RCV000508942|RCV000735201|RCV001004604|RCV001198082|RCV001095683|RCV001376079|RCV001731286|RCV001813983|RCV001847600|RCV002273931|RCV002316195	MONDO:MONDO:0009783,MedGen:C4225153,OMIM:258450,Orphanet:254886|MONDO:MONDO:0011835,MedGen:C1843851,OMIM:607459,Orphanet:70595|MONDO:MONDO:0016809,MedGen:C1843852,Orphanet:254881|MONDO:MONDO:0008758,MedGen:C0205710,OMIM:203700,Orphanet:726|MedGen:C3661900|MONDO:MONDO:0024528,MedGen:C1834846,OMIM:157640|MedGen:C4763519|6 conditions|MONDO:MONDO:0044970,MedGen:C0751651,Orphanet:68380||MONDO:MONDO:00…	Progressive external ophthalmoplegia with mitochondrial DNA deletions, autosomal recessive 1|Sensory ataxic neuropathy, dysarthria, and ophthalmoparesis|Spinocerebellar ataxia with epilepsy|Progressive sclerosing poliodystrophy|not provided|Progressive external ophthalmoplegia with mitochondrial DNA deletions, autosomal dominant 1|POLG-Related Spectrum Disorders|6 conditions|Mitochondrial disease…	biparental;germline;inherited;maternal;paternal;unknown	germline	GRCh37	NC_000015.9	15	89870432	89870432	na	na	15q26.1	criteria provided, multiple submitters, no conflicts	42	-	N	ClinGen:CA123140,UniProtKB:P54098#VAR_012155,OMIM:174763.0002	3	13496	89870432	C	T	POLG:NM_001126131:exon7:c.G1399A:p.A467T,POLG:NM_002693:exon7:c.G1399A:p.A467T	0.003	pathogenic	0.055	benign	1.0	pathogenic	0.996	pathogenic	1.95	pathogenic	1.0	pathogenic	-3.1	pathogenic
POLG	28536	single nucleotide variant	NM_002693.3(POLG):c.911T>G (p.Leu304Arg)	5428	POLG	HGNC:9179	Pathogenic/Likely pathogenic	1	Apr 27, 2023	121918044	-	RCV000014444|RCV000188648|RCV000626287|RCV000762954|RCV001266602|RCV001813984|RCV003387722	MONDO:MONDO:0009783,MedGen:C4225153,OMIM:258450,Orphanet:254886|MedGen:CN517202|MONDO:MONDO:0008758,MedGen:C0205710,OMIM:203700,Orphanet:726|6 conditions|MeSH:D030342,MedGen:C0950123|Human Phenotype Ontology:HP:0012103,MedGen:C4023042|MedGen:CN180166	Progressive external ophthalmoplegia with mitochondrial DNA deletions, autosomal recessive 1|not provided|Progressive sclerosing poliodystrophy|6 conditions|Inborn genetic diseases|Abnormality of the mitochondrion|POLG-related disorders	germline;inherited;unknown	germline	GRCh37	NC_000015.9	15	89872286	89872286	na	na	15q26.1	criteria provided, multiple submitters, no conflicts	17	-	N	ClinGen:CA256883,UniProtKB:P54098#VAR_012154,OMIM:174763.0003	3	13497	89872286	A	C	POLG:NM_001126131:exon4:c.T911G:p.L304R,POLG:NM_002693:exon4:c.T911G:p.L304R	0.001	pathogenic	0.003	pathogenic	1.0	pathogenic	0.998	pathogenic	2.975	pathogenic	0.95	pathogenic	-2.97	pathogenic
POLG	28538	single nucleotide variant	NM_002693.3(POLG):c.1879C>T (p.Arg627Trp)	5428	POLG	HGNC:9179	Pathogenic	1	Aug 31, 2021	121918046	-	RCV000014446|RCV001382679|RCV001781264	MONDO:MONDO:0011835,MedGen:C1843851,OMIM:607459,Orphanet:70595|MONDO:MONDO:0008758,MedGen:C0205710,OMIM:203700,Orphanet:726|MedGen:CN517202	Sensory ataxic neuropathy, dysarthria, and ophthalmoparesis|Progressive sclerosing poliodystrophy|not provided	germline	germline	GRCh37	NC_000015.9	15	89868751	89868751	na	na	15q26.1	criteria provided, multiple submitters, no conflicts	3	-	N	ClinGen:CA256887,UniProtKB:P54098#VAR_023672,OMIM:174763.0005	3	13499	89868751	G	A	POLG:NM_001126131:exon10:c.C1879T:p.R627W,POLG:NM_002693:exon10:c.C1879T:p.R627W	0.001	pathogenic	0.003	pathogenic	1.0	pathogenic	0.965	pathogenic	2.74	pathogenic	0.49	benign	-4.14	pathogenic
[truncated: 8,713 more rows]
[truncated: 54 more columns]

## Sheet: Supplementary Table S2
Supplementary Table S2 Pathogenicity score thresholds of 30 in silico prediction tools from the VarCards2 database
Prediction Tool	Pathogenicity Threshold
SIFT	Pathogenic < 0.05
SIFT4G	Pathogenic < 0.05
PolyPhen2_HD	Pathogenic > 0.5
PolyPhen2_HV	Pathogenic > 0.5
[truncated: 26 more rows]

## Sheet: Supplementary Table S3
Supplementary Table S3 Overview of the three data subsets
[truncated: 10 more rows]

[truncated: 7 more sheets: Supplementary Table S4, Supplementary Table S5, Supplementary Table S6, Supplementary Table S7, Supplementary Table S8, Supplementary Table S9, Supplementary Table S10]
